# Supplementary material for: Estimating the effects of non-pharmaceutical interventions on the number of new infections with COVID-19 during the first epidemic wave
Source: PubMed Central journal article supplement (PMC8171941; doi:10.1371/journal.pone.0252827), 2021-06-02
Supplement: pone.0252827.s001.pdf [file pone.0252827.s001.pdf]

## Supplementary material:

### Estimating the effects of non-pharmaceutical interventions on the number of new infections with COVID-19 during the first epidemic wave

Nicolas Banholzer<sup>1</sup>, Eva van Weenen<sup>1</sup>, Adrian Lison<sup>1</sup>, Alberto Cenedese<sup>1</sup>, Arne Seeliger<sup>1</sup>, Bernhard Kratzwald<sup>1</sup>, Daniel Tschernutter<sup>1</sup>, Joan Puig Salles<sup>1</sup>, Pierluigi Bottrighi<sup>1</sup>, Sonja Lehtinen<sup>2</sup>, Stefan Feuerriegel<sup>1</sup>, and Werner Vach<sup>3,4,\*</sup>

<sup>1</sup>Department of Management, Technology, and Economics, ETH Zurich, Zurich, Switzerland

<sup>2</sup>Department of Environmental Systems Science, ETH Zurich, Zurich, Switzerland

<sup>3</sup>Basel Academy for Quality and Research in Medicine, Basel, Switzerland

<sup>4</sup>Department of Environmental Sciences, University of Basel, Basel, Switzerland

\*Corresponding author: [werner.vach@unibas.ch](mailto:werner.vach@unibas.ch)

## Abstract

The supplementary material contains (1) a detailed description of the method, (2) discussion of methodological aspects in comparison to related work, (3) description and results from a simulation-based study, (4) further descriptives on the timing of non-pharmaceutical interventions, (5) detailed estimation results and model checks, (6) results from the sensitivity analysis, (7) a visual inspection of the model fit, and (8) data on non-pharmaceutical interventions.

# 14 Contents

|    |                                                                                                         |           |
|----|---------------------------------------------------------------------------------------------------------|-----------|
| 15 | <b>1 Method</b>                                                                                         | <b>6</b>  |
| 16 | 1.1 Notation                                                                                            | 6         |
| 17 | 1.2 Overall approach                                                                                    | 6         |
| 18 | 1.3 Relating the number of new infections to the number of contagious subjects and the presence of NPIs | 7         |
| 19 | 1.4 Relating the number of observed cases to the number of new infections in the previous days          | 8         |
| 20 | 1.5 Relating the number of contagious subjects to the number of new infections in the previous days     | 8         |
| 21 | 1.6 Relating the probability to be contagious to the generation time distribution                       | 9         |
| 22 | 1.7 Choice of priors for the parameters of the distribution of the time from infection to reporting     | 9         |
| 23 | 1.8 Choice of estimate for the generation time distribution                                             | 10        |
| 24 | 1.9 Choice of the functional form of the time-delayed response function                                 | 12        |
| 25 | 1.10 Modeling and non-modeling phase                                                                    | 12        |
| 26 | 1.11 Choice of prior distributions for the effect of NPIs                                               | 13        |
| 27 | 1.12 Choice of prior distributions (summary)                                                            | 14        |
| 28 | 1.13 Model parameter estimation                                                                         | 15        |
| 29 | 1.14 Ignoring undetected infections                                                                     | 16        |
| 30 | <b>2 Methodological aspects and comparison with related work</b>                                        | <b>17</b> |
| 31 | <b>3 Simulation-based study</b>                                                                         | <b>18</b> |
| 32 | <b>4 Timing of non-pharmaceutical interventions</b>                                                     | <b>20</b> |
| 33 | <b>5 Estimation results</b>                                                                             | <b>22</b> |
| 34 | 5.1 Estimated model parameters                                                                          | 22        |
| 35 | 5.2 Checking for correlations between parameters                                                        | 25        |
| 36 | 5.3 Checking for influential observations                                                               | 27        |
| 37 | <b>6 Sensitivity analysis</b>                                                                           | <b>29</b> |
| 38 | 6.1 Modeling phase starting from 10 cumulative cases onward                                             | 29        |
| 39 | 6.2 Modeling phase ending 21 to 35 days after last NPI was implemented                                  | 30        |
| 40 | 6.3 Varying the time-delayed response functions                                                         | 31        |
| 41 | 6.4 Varying the prior distribution for the effects of non-pharmaceutical interventions                  | 32        |
| 42 | 6.5 Varying the prior distribution for the time from infection to reporting of a new case               | 33        |

|    |                                                                              |            |
|----|------------------------------------------------------------------------------|------------|
| 43 | 6.6 Varying the generation time distribution . . . . .                       | 36         |
| 44 | 6.7 Analyzing the influence of leaving out one country at the time . . . . . | 38         |
| 45 | <b>7 Visual inspection of the model fit</b>                                  | <b>41</b>  |
| 46 | <b>8 Data on non-pharmaceutical interventions</b>                            | <b>52</b>  |
| 47 | 8.1 Data collection . . . . .                                                | 52         |
| 48 | 8.2 Data Sources . . . . .                                                   | 53         |
| 49 | <b>References</b>                                                            | <b>136</b> |

## 50 List of Figures

|    |                                                                                               |    |
|----|-----------------------------------------------------------------------------------------------|----|
| 51 | 1 Prior choice for the distribution of the time from infection to reporting of a new case . . | 11 |
| 52 | 2 Prior choice for the generation time distribution . . . . .                                 | 11 |
| 53 | 3 Prior choice for the effects of non-pharmaceutical interventions $\theta_m$ . . . . .       | 15 |
| 54 | 4 Estimated effects based on 50 simulations of fake data for scenario 1 (first row) and       |    |
| 55 | 2 (second row), respectively. <b>(a,c)</b> Boxplot of the estimated effects (posterior mean   |    |
| 56 | with the true effect in red, respectively). <b>(b,d)</b> Proportion of simulations where the  |    |
| 57 | posterior credible intervals (CrIs) contain the true effect. . . . .                          | 19 |
| 58 | 5 Distribution of the time from infection to reporting of a new case . . . . .                | 24 |
| 59 | 6 Bivariate posterior distributions for the parameters of non-pharmaceutical interventions    | 26 |
| 60 | 7 Model diagnostics based on influential observations . . . . .                               | 28 |
| 61 | 8 Comparison of the effects of non-pharmaceutical interventions when varying the start        |    |
| 62 | of the modeling phase . . . . .                                                               | 29 |
| 63 | 9 Comparison of the effects of non-pharmaceutical interventions when the modeling             |    |
| 64 | phase ends 21 or 35 days after the last NPI was implemented . . . . .                         | 30 |
| 65 | 10 Comparison of the effects of non-pharmaceutical interventions when varying the time        |    |
| 66 | delayed response function . . . . .                                                           | 31 |
| 67 | 11 Comparison of the effects of non-pharmaceutical interventions when varying the prior       |    |
| 68 | distribution for the effects of non-pharmaceutical interventions . . . . .                    | 32 |
| 69 | 12 Prior choices for the distribution of the time from infection to reporting of a new case   |    |
| 70 | in the sensitivity analysis . . . . .                                                         | 34 |

|    |    |                                                                                                                                                                               |    |
|----|----|-------------------------------------------------------------------------------------------------------------------------------------------------------------------------------|----|
| 71 | 13 | Comparison of the effects of non-pharmaceutical interventions when varying the prior choices for distribution of the time from infection to reporting of a new case . . . . . | 35 |
| 72 |    |                                                                                                                                                                               |    |
| 73 | 14 | Prior choices for the generation time distribution in the sensitivity analysis . . . . .                                                                                      | 36 |
| 74 | 15 | Comparison of the effects of non-pharmaceutical interventions when varying the generation time distribution . . . . .                                                         | 37 |
| 75 |    |                                                                                                                                                                               |    |
| 76 | 16 | Comparison of the effects of non-pharmaceutical interventions in a leave-one-country analysis . . . . .                                                                       | 39 |
| 77 |    |                                                                                                                                                                               |    |
| 78 | 17 | Comparison of the effects of non-pharmaceutical interventions when leaving-out Eastern or Western Australia . . . . .                                                         | 40 |
| 79 |    |                                                                                                                                                                               |    |
| 80 | 18 | Expected number of new infections and new cases and observed number of new cases over time for Australia and Austria . . . . .                                                | 42 |
| 81 |    |                                                                                                                                                                               |    |
| 82 | 18 | Expected number of new infections and new cases and observed number of new cases over time for Belgium and Canada . . . . .                                                   | 43 |
| 83 |    |                                                                                                                                                                               |    |
| 84 | 18 | Expected number of new infections and new cases and observed number of new cases over time for Denmark and Finland . . . . .                                                  | 44 |
| 85 |    |                                                                                                                                                                               |    |
| 86 | 18 | Estimated number of new infections and new cases and observed number of new cases over time for France and Germany . . . . .                                                  | 45 |
| 87 |    |                                                                                                                                                                               |    |
| 88 | 18 | Expected number of new infections and new cases and observed number of new cases over time for Greece and Ireland . . . . .                                                   | 46 |
| 89 |    |                                                                                                                                                                               |    |
| 90 | 18 | Expected number of new infections and new cases and observed number of new cases over time for Italy and Luxembourg . . . . .                                                 | 47 |
| 91 |    |                                                                                                                                                                               |    |
| 92 | 18 | Expected number of new infections and new cases and observed number of new cases over time for the Netherlands and Norway . . . . .                                           | 48 |
| 93 |    |                                                                                                                                                                               |    |
| 94 | 18 | Expected number of new infections and new cases and observed number of new cases over time for Portugal and Spain . . . . .                                                   | 49 |
| 95 |    |                                                                                                                                                                               |    |
| 96 | 18 | Expected number of new infections and new cases and observed number of new cases over time for Sweden and Switzerland . . . . .                                               | 50 |
| 97 |    |                                                                                                                                                                               |    |
| 98 | 18 | Expected number of new infections and new cases and observed number of new cases over time for the United Kingdom and the United States . . . . .                             | 51 |
| 99 |    |                                                                                                                                                                               |    |

# List of Tables

100  
101  
102  
103  
104  
105  
106  
107  
108  
109  
110  
111  
112  
113  
114  
115  
116  
117  
118  
119  
120  
121  
122  
123  
124  
125  
126

|    |                                                                                                                                                                                                                                                                                                                                                                                                                                                                                                                                                |     |
|----|------------------------------------------------------------------------------------------------------------------------------------------------------------------------------------------------------------------------------------------------------------------------------------------------------------------------------------------------------------------------------------------------------------------------------------------------------------------------------------------------------------------------------------------------|-----|
| 1  | Start and end of non-modeling and modeling phase by country. . . . .                                                                                                                                                                                                                                                                                                                                                                                                                                                                           | 14  |
| 2  | Prior choices for model parameters. . . . .                                                                                                                                                                                                                                                                                                                                                                                                                                                                                                    | 15  |
| 3  | Distance (in days) to the next NPIs in time per contry and NPI. “Average” is the mean distance over all countries. Computation: For each NPI, the distance is measured as the absolute difference (in days) to the NPI that was implemented closest before or after, which is then averaged across countries. For countries where NPIs were implemented at the regional level, the absolute differences were first averaged over all regions. If an NPI was not implemented, then the absolute difference is omitted from computation. . . . . | 20  |
| 4  | Pairwise average distance (in days) between the implementation of NPIs across countries. Computation: For each pair of NPIs, the distance is measured as the absolute difference (in days) between the implementation dates of NPIs, which is then averaged across countries. For countries where NPIs were implemented at the regional level, the absolute differences were first averaged over all regions. If an NPI was not implemented, then the absolute difference is omitted from computation. . . . .                                 | 21  |
| 5  | Estimation results . . . . .                                                                                                                                                                                                                                                                                                                                                                                                                                                                                                                   | 23  |
| 6  | Sources for policies in Switzerland, Austria, Belgium, Denmark, Finland, France, United Kingdom, Greece, Ireland, Luxembourg, Netherlands, Norway, Portugal, Sweden, United States of America, Germany, Italy, Spain, Canada, and Australia . . . . .                                                                                                                                                                                                                                                                                          | 63  |
| 7  | Sources for policies implemented across different US States . . . . .                                                                                                                                                                                                                                                                                                                                                                                                                                                                          | 87  |
| 8  | Sources for policies implemented across different German regions . . . . .                                                                                                                                                                                                                                                                                                                                                                                                                                                                     | 93  |
| 9  | Sources for policies implemented across different Spanish regions . . . . .                                                                                                                                                                                                                                                                                                                                                                                                                                                                    | 104 |
| 10 | Sources for policies implemented across different Canadian regions . . . . .                                                                                                                                                                                                                                                                                                                                                                                                                                                                   | 110 |
| 11 | Sources for policies implemented across different Australian regions . . . . .                                                                                                                                                                                                                                                                                                                                                                                                                                                                 | 114 |
| 12 | Sources for policies implemented across different Italian regions . . . . .                                                                                                                                                                                                                                                                                                                                                                                                                                                                    | 124 |
| 13 | Sources for policies implemented across different Swiss regions . . . . .                                                                                                                                                                                                                                                                                                                                                                                                                                                                      | 135 |

# 1 Method

## 1.1 Notation

$j$  country

$t$  days since start of observation period

$N_{jt}$  number of reported new cases in country  $j$  at day  $t$

$I_{jt}$  number of new infections (transmissions) in country  $j$  at day  $t$  (unobserved)

$C_{jt}$  number of contagious subjects in country  $j$  at day  $t$  (unobserved)

To model the impact of a non-pharmaceutical intervention (NPI) in a specific country, we have to take into account that some countries introduced the NPIs only in specific subregions or at different timepoints in different subregions. Hence, with respect to the NPIs, we introduce the following notation:

$m$  NPI (numbered from 1 to  $M$ )

$r$  subregion  $r$  of country  $j$  ( $r = 1, \dots, R_j$ )

$T_{mrjt}$  number of days since NPI  $m$  took effect in region  $r$  of country  $j$  at day  $t$  (counting the first day at which the NPI could affect the number of new cases as  $t = 1$ )

$p_{rj}$  the share of region's  $r$  population of the total population of country  $j$

Note that, also in countries with several regions, only the overall number of new cases is analyzed, not region specific counts.

## 1.2 Overall approach

The overall aim is to assess the impact of NPI  $m$  on the number of new infections in the days after the NPI becomes active. We approach this by modeling the number of new infections as a function of the number of contagious subjects and the presence of active measures. That is, we consider a model linking two unobserved quantities. To obtain a model in the observed quantities  $N_{jt}$ , we link this number to the number of new infections in the previous days. Similarly, we link the number of contagious subjects to the number of new infections in the previous days. The overall model is then

147 fitted using a fully Bayesian approach, which requires the specification of prior distributions for all  
 148 model parameters.

149 In the following, we present the three submodels and describe to which degree external knowledge  
 150 is incorporated to justify choices.

### 151 **1.3 Relating the number of new infections to the number of con-** 152 **tagious subjects and the presence of NPIs**

153 Let  $\theta_m$  denote the relative reduction of new infections when NPI  $m$  is fully implemented, i.e. the  
 154 fraction of avoided new infections compared to the situation without this NPI. Let  $f(t)$  denote a  
 155 function taking values between 0 and 1 describing the degree of implementation as a function of the  
 156 time since start of the NPI. In a country  $j$  with only one region,  $\theta_m f(T_{m1jt})$  describes the fraction of  
 157 new infections that are avoided in this country at day  $t$ . If regions are exposed to NPIs to a varying  
 158 degree, the corresponding fraction is  $\theta_m \sum_{r=1}^{R_j} p_{rj} f(T_{mrjt})$ .

The overall fraction of *un*-avoided new infections is then given by

$$\prod_{m=1}^M \left( 1 - \theta_m \sum_{r=1}^{R_j} p_{rj} f(T_{mrjt}) \right). \quad (1)$$

In the absence of any measure, the expected value of the number of new infections  $\mu^{I_{jt}}$  would be determined by the number of contagious subjects  $C_{jt}$  and the country-specific daily transmission rate  $\delta_j$ , i.e.,  $\mu^{I_{jt}} = C_{jt} \delta_j$ . In the presence of NPIs, we have to multiply this with the fraction of un-avoided infections, resulting in

$$\mu^{I_{jt}} = C_{jt} \delta_j \prod_{m=1}^M \left( 1 - \theta_m \sum_{r=1}^{R_j} p_{rj} f(T_{mrjt}) \right). \quad (2)$$

It would be natural to model the number of new infections as a negative binomial distribution. However, the software used in this work does not allow integer values for unobserved variables. Therefore, a normal distribution was used instead, with the mean and standard deviation analogous to a negative binomial distribution:

$$I_{jt} \sim \text{Lognormal}(\mu^{I_{jt}}, \sigma^{I_{jt}}), \quad (3)$$

159 with  $\sigma^{I_{jt}} = \sqrt{\mu^{I_{jt}} \left(1 + \frac{\mu^{I_{jt}}}{\phi^I}\right)}$ , and an overdispersion parameter  $\phi^I$ .

## 160 **1.4 Relating the number of observed cases to the number of new** 161 **infections in the previous days**

The expected number  $\mu^{N_{jt}}$  of new cases  $N_{jt}$  in country  $j$  at day  $t$  can be derived from the number of new infections in the previous days as

$$\mu^{N_{jt}} = \sum_{s < t} I_{js} \cdot p_{\text{IN}}(t-s) , \quad (4)$$

162 where  $p_{\text{IN}}(t)$  denotes the probability that a new infected subject is reported at day  $t$  after the  
163 infection, i.e., becomes a new case. It is assumed that  $p_{\text{IN}}(t)$  is a discretized version of a lognormal  
164 distribution. This distribution is estimated from our data as part of fitting the overall model using a  
165 weakly informative prior, as described later.

The observed number of new cases are modeled to follow a negative binomial distribution (NB),  
i.e.,

$$N_{jt} \sim \text{NB}(\mu^{N_{jt}}, \sigma^{N_{jt}}) \quad (5)$$

166 with mean  $\mu^{N_{jt}}$ , standard deviation  $\sigma^{N_{jt}} = \sqrt{\mu^{N_{jt}} \left(1 + \frac{\mu^{N_{jt}}}{\phi^N}\right)}$ , and an overdispersion parameter  $\phi^N$ .

## 167 **1.5 Relating the number of contagious subjects to the number** 168 **of new infections in the previous days**

The expected number  $\mu^{C_{jt}}$  of contagious subjects in country  $j$  at day  $t$  can be derived from the number of new infections in the previous days as

$$\mu^{C_{jt}} = \sum_{s < t} I_{js} p_{\text{IC}}(t-s) , \quad (6)$$

169 where  $p_{\text{IC}}(t)$  denotes the probability that a new infected subject is contagious at day  $t$  after the  
170 infection. Since our data does not include information about these probabilities, we make a choice  
171 based on external information and considerations presented in the next section. Moreover, we regard



172 the relation between  $I_{jt}$  and  $C_{jt}$  as a deterministic one, i.e.,  $C_{jt} = \mu^{C_{jt}}$ .

## 173 **1.6 Relating the probability to be contagious to the generation** 174 **time distribution**

Let  $\gamma$  denote the probability that a randomly chosen contagious subject infects another randomly chosen subject within one day. Considering the probabilities  $q(t)$  that an infected subject infects another randomly chosen subject at day  $t$  after his/her own infection, there is the simple relation

$$q(t) = p_{IC}(t) \gamma . \tag{7}$$

Now, let  $p_G(t)$  denote the density of the generation time distribution. That is, given a subject has infected another subject,  $p_G(t)$  is the probability that this has happened  $t$  days after his/her infection. It follows that there is a simple relation

$$p_G(t) = \frac{q(t)}{\sum_t q(t)} = \frac{p_{IC}(t) \gamma}{\sum_t p_{IC}(t) \gamma} = \frac{p_{IC}(t)}{\sum_t p_{IC}(t)} \tag{8}$$

175 showing that  $p_{IC}(t)$  is proportional to the generation time distribution. Consequently, an estimate  
176 for the generation time distribution is needed. The proportionality factor can be omitted because  
177  $\mu^{I_{jt}}$  is multiplicative in  $C_{jt}$ , and thus the omitted factor can be subsumed into  $\delta_j$ .

178 Approximating  $p_{IC}$  by the generation time distribution has been also done by Cori et al<sup>1</sup>. A  
179 more rigorous discussion about the validity of this approximation is given by Fraser et al<sup>2</sup>. Since  
180 we model the ratio between the expected number of new infections and the number of contagious  
181 subjects, our approach can be also interpreted as modeling the course of the reproduction number  
182 over time.

## 183 **1.7 Choice of priors for the parameters of the distribution of the** 184 **time from infection to reporting**

185 The time from infection to reporting of a new case can be written as a sum of the incubation  
186 period and the time from symptom onset to reporting (i.e., the reporting delay). Estimates for  
187 these individual distributions can be found in the literature. A rapid systematic review and meta

188 analysis of observational research on the incubation period<sup>3</sup> arrived at a lognormal distribution  
189 for the incubation period and reported estimates of  $\mu = 1.63$  for the mean and of  $\sigma = 0.50$  for the  
190 standard deviation of the natural logarithm. This translates into an average incubation period of  
191 about six days. A study on the COVID-19 outbreak in Italy<sup>4</sup> arrived at a Gamma distribution for  
192 the reporting delay and reported estimates of  $\alpha = 1.88$  for the shape and  $\beta = 0.26$  for the inverse  
193 scale. This translates into an average reporting delay of about seven days, which is in line with  
194 estimates from other countries<sup>5-8</sup>.

195 It is reasonable to assume that the incubation period and the reporting delay are independent.  
196 Following this assumption, the distribution for the time from infection to reporting of a new case is  
197 the sum of i.i.d. random variables and thus we can compute the mean and variance as the sum of  
198 the individual means and variances. Assuming for the sum again a lognormal distribution hence  
199 leads to the choice of a Lognormal( $\mu = 2.47, \sigma = 0.45$ ). This translates into an average delay for the  
200 time from infection to reporting of a new case of about thirteen days with a standard deviation  
201 of six days. However, a fixed choice for  $p_{\text{IN}}$  would neglect the uncertainty about the shape of the  
202 distribution and thus the parameters of the lognormal distribution were instead estimated from our  
203 data as part of fitting the overall model. To do so, weakly informative priors are chosen for the  
204 mean  $\mu \sim \text{Normal}(2.47, 0.50)$  and standard deviation  $\sigma \sim \text{Gamma}(2.00, 4.48)$  (since  $\frac{2.00}{4.48} \approx 0.45$ ) of  
205 the natural logarithm. Our choices reflect prior knowledge about the delay's mean and standard  
206 deviation, while taking uncertainty about their estimates into account.

207 The prior distributions for  $\mu$  and  $\sigma$  as well as the resulting prior distributions for the discrete  
208 probabilities  $p_{\text{IN}}(t)$  are shown in Fig 1. Note that  $p_{\text{IN}}$  is discretized via  $p_{\text{IN}}(s) = \int_0^{0.5} p_{\text{IN}}(\tau) d\tau$  for  
209  $s = 0$  and  $p_{\text{IN}}(s) = \int_{s-0.5}^{s+0.5} p_{\text{IN}}(\tau) d\tau$  for  $s = 1, 2, \dots$ , where  $p_{\text{IN}}(\tau) \sim \text{Lognormal}(\mu, \sigma)$  is the density of  
210 the lognormal distribution with mean  $\mu$  and standard deviation  $\sigma$ .

## 211 1.8 Choice of estimate for the generation time distribution

212 The generation time distribution is often approximated by the serial interval distribution (e.g.,<sup>9</sup>).  
213 However, it was recently pointed out that this approximation is based on the assumption that the  
214 incubation period and the infectiousness profile are independent<sup>10</sup>, which is questionable. Other  
215 studies estimated the generation time distribution from data on transmission pairs<sup>11,12</sup>, thereby  
216 making the implicit assumption that the generation time is independent of the incubation period<sup>10</sup>,

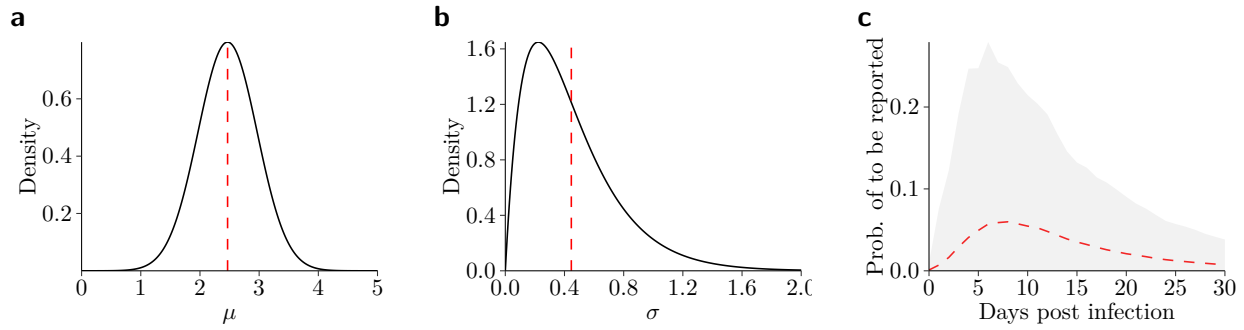

**Fig 1.** Prior choice for the distribution of the time from infection to reporting of a new case. **(a)** Log mean  $\mu$  (prior mean as dashed red line). **(b)** Log standard deviation  $\sigma$  (prior mean as dashed red line). **(c)** Distribution of  $p_{IN}(t)$  for  $t = 0, 1, \dots, 30$  (prior mean as dashed red line with 95% range as shaded area, based on 4,000 independent draws from the distributions for  $\mu$  and  $\sigma$ ).

217 which is also questionable.

218 By leveraging data on the exposure for both index and secondary cases, a recent study inferred  
 219 the generation distribution more accurately<sup>13</sup> without having to make the above assumptions. This  
 220 study suggests to use a Weibull(3.28, 6.12) distribution, which has a mean of 5.49 days and a standard  
 221 deviation of 1.84 days.

222 The discrete form of this distribution is depicted in Fig 2. Again, the distribution is discretized  
 223 via  $p_G(s) = \int_0^{1.5} p_G(\tau) d\tau$  for  $s = 1$  and  $p_G(s) = \int_{s-0.5}^{s+0.5} p_G(\tau) d\tau$  for  $s = 2, 3, \dots$ , where  $p_G(\tau) \sim$   
 224 Weibull(3.28, 6.12) is the density of the Weibull distribution with shape  $\alpha$  and scale  $\kappa$ . Note that we  
 225 explicitly set  $p_{IC}(0)$  to 0, avoiding the challenge to include new infections at one day in the number  
 226 of contagious subjects the same day.

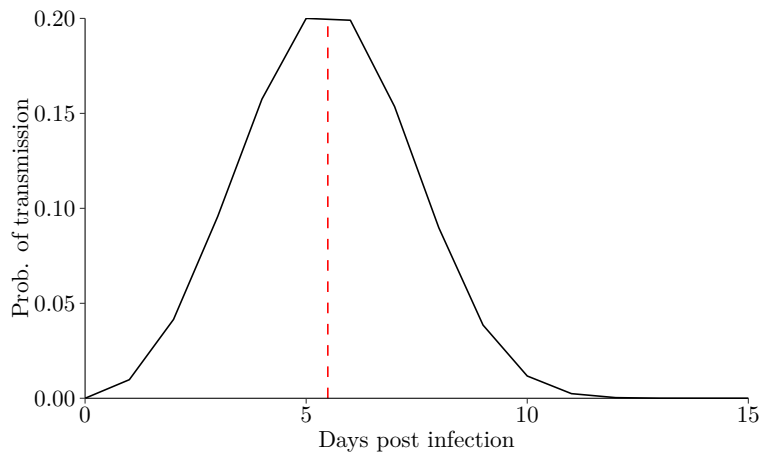

**Fig 2.** Prior choice for the generation time distribution  $p_G(t)$ .

227 **1.9 Choice of the functional form of the time-delayed response**  
 228 **function**

We model the time-delayed response function with a first-order spline

$$f(t) = \begin{cases} 0, & \text{if } t \leq t_0, \\ \frac{t-t_0}{t_1-t_0}, & \text{if } t_0 < t < t_1, \\ 1, & \text{if } t \geq t_1. \end{cases} \quad (9)$$

229 This means that the effect of an NPI increases linearly after its implementation until  $t_1$ . We set  $t_0 = 0$   
 230 days and  $t_1 = 3$  days, reflecting a three day period until people fully respond to the implemented  
 231 NPI.

232 **1.10 Modeling and non-modeling phase**

It took some time for countries to set up reporting practices so that case numbers at the very beginning of the epidemic are often missing or irregular. That is why, in each country, modeling of the number of new cases starts after 100 cumulative cases were reported, i.e., the first day at which the number of cumulative cases exceeds 100 is set as  $t = 1$ . Before that, the number of new cases is seeded similar to Ref.<sup>9</sup>. That is, in the non-modeling phase, the modeling of  $N_{jt}$  is ignored, but the other components are still used and, in particular,  $\mu^{I_{jt}}$  and  $\mu^{C_{jt}}$  are computed. The start of the non-modeling phase is determined as the day at which we would expect the first case when reaching 100 cumulative cases at day  $t = 1$ , given the reproduction number, mean generation time and reporting delay as specified. That is,

$$t = 1 - \frac{\log 100}{\log 3.28} \cdot 5.49 + 13.01 \approx -33, \quad (10)$$

where  $R_0 = 3.28$  is the basic reproductive number taken from a meta analysis across countries<sup>14</sup>, 5.49 days is the mean generation time and 13.01 days is the mean time from infection to reporting. For  $I_{j-33}$ , we replace the recursive formula of our model with

$$I_{j-33} \sim \text{Exponential} \left( \frac{1}{\lambda} \right) \quad (11)$$

and choose  $\lambda \sim \text{Exponential}(1)$  as a prior distribution. Thereby, it is expected that one person is infected at day  $t = -33$ , but the estimated number can vary substantially by country. Using the recursive formula, the number of contagious subjects at the start of the non-modeling phase are computed from the initially infected seven days before the non-modeling phase. The initially infected are computed by assuming an exponential growth rate of  $\frac{\log 3.28}{5.49}$ , i.e.,

$$I_{jt} = I_{j-33} \cdot \frac{1}{\exp\left(\frac{\log 3.28}{5.49} \cdot (-33 - t)\right)}, \quad t = -40, -39, \dots, -34.$$

233 Note that the initially infected are only computed to smooth the number of infected and contagious  
 234 subjects at the start of the non-modeling phase.

235 The end of the modeling phase is, in each country, set to 28 days after the last NPI was  
 236 implemented in any of the country's regions. This provides sufficient time for the effects of NPIs to  
 237 show up in the number of new cases, thereby concluding the first wave of the epidemic, as most  
 238 countries saw their case numbers reverting back after all NPIs were in place. The start of the  
 239 non-modeling phase as well as the start and end of the modeling phase are shown in Table 1. We  
 240 made only two adjustments. In Australia, Queensland closed schools on April 20, while all other  
 241 regions implemented their NPIs before April 2, thus we set April 2 plus 28 days for the end of the  
 242 modeling phase in Australia. Similarly, in Canada, Northwest Territories canceled gatherings on  
 243 April 11 while all other territories implemented their NPIs before April 1, thus we set April 1 plus  
 244 28 days for the end of the modeling phase in Canada.

## 245 1.11 Choice of prior distributions for the effect of NPIs

246 Our primary goal is to infer the effect of NPIs. These policy measures were implemented to reduce  
 247 new infections via social distancing. We wanted to construct a prior for the effect of NPIs that  
 248 (1) has support  $\theta_m \in (-\infty, 1)$ , thereby not precluding a negative effect corresponding to an increase  
 249 in new infections from NPIs but also allowing a single NPI to account for a complete elimination of  
 250 transmissions, (2) gives higher probability to positive effects than to negative effects, and (3) is  
 251 little informative with respect to the magnitude of a positive effect.

The desired properties were accomplished with a mixture of a half normal distribution for

| Country        | Non-modeling phase | Modeling phase |        |
|----------------|--------------------|----------------|--------|
|                | Start              | Start          | End    |
| Australia      | Feb 11             | Mar 10         | Apr 30 |
| Austria        | Feb 09             | Mar 08         | Apr 16 |
| Belgium        | Feb 07             | Mar 06         | Apr 17 |
| Canada         | Feb 12             | Mar 11         | Apr 29 |
| Denmark        | Feb 11             | Mar 10         | Apr 15 |
| Finland        | Feb 14             | Mar 13         | Apr 16 |
| France         | Feb 01             | Feb 29         | Apr 14 |
| Germany        | Feb 02             | Mar 01         | Apr 20 |
| Greece         | Feb 14             | Mar 13         | Apr 20 |
| Ireland        | Feb 15             | Mar 14         | Apr 25 |
| Italy          | Jan 26             | Feb 23         | Apr 23 |
| Luxembourg     | Feb 18             | Mar 17         | Apr 15 |
| Netherlands    | Feb 07             | Mar 06         | Apr 20 |
| Norway         | Feb 07             | Mar 06         | Apr 13 |
| Portugal       | Feb 14             | Mar 13         | Apr 19 |
| Spain          | Feb 03             | Mar 02         | Apr 27 |
| Sweden         | Feb 07             | Mar 06         | Apr 24 |
| Switzerland    | Feb 06             | Mar 05         | Apr 22 |
| United Kingdom | Feb 03             | Mar 02         | Apr 20 |
| United States  | Feb 05             | Mar 04         | May 05 |

**Table 1.** Start and end of non-modeling and modeling phase by country.

negative effects and a uniform distribution for positive effects. The formal specification

$$\theta_m \sim \text{Mixture}(w) = \begin{cases} \text{Normal}^-(0, \sigma) & \text{with probability } w, \\ \text{Uniform}(0, 1) & \text{with probability } (1 - w). \end{cases} \quad (12)$$

where  $w \in [0, 1]$  is the mixing ratio. For efficient sampling, the prior density should rather be continuous and thus  $\sigma$  is chosen based on  $w$  such that this is the case, i. e.,

$$\sigma = \frac{w}{(1 - w) \sqrt{2\pi}}. \quad (13)$$

252 As a default, a mixing ratio of  $w = 0.1$  is chosen, which implies a 10% probability that NPIs can lead  
 253 to an increase in new infections, resulting in  $\sigma = 0.04$ . The density of this prior is shown in Fig 3.

## 254 1.12 Choice of prior distributions (summary)

255 Table 2 provides an overview of the model parameters together with the choice of priors. If not  
 256 tailored to the specifics of our model, the choice of priors are informed by recommendations on the  
 257 choice of priors from the Stan Development Team<sup>15</sup>.

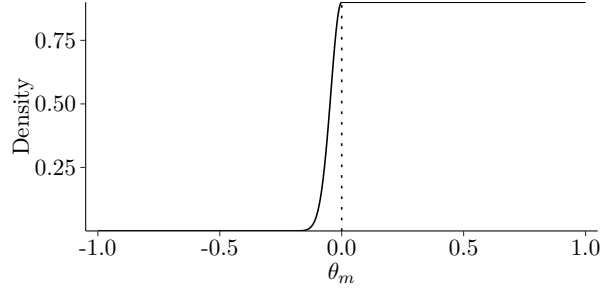

**Fig 3.** Prior choice for the effects of non-pharmaceutical interventions  $\theta_m$ .

| Parameter                                | Notation   | (Hyper-)Prior                                                                                                                                 |
|------------------------------------------|------------|-----------------------------------------------------------------------------------------------------------------------------------------------|
| NPIs                                     | $\theta_m$ | Mixture(0.1) = $\begin{cases} \text{Normal}^-(0, 0.04) & \text{with prob. } 0.1 \\ \text{Uniform}(0, 1) & \text{with prob. } 0.9 \end{cases}$ |
| Country-specific daily transmission rate | $\delta_j$ | $\delta_j = \exp(\alpha + \alpha_j)$                                                                                                          |
|                                          | $\alpha$   | Student-t( $\nu = 7, \mu = 0, \sigma = 10$ )                                                                                                  |
|                                          | $\alpha_j$ | Normal( $0, \tau$ )                                                                                                                           |
|                                          | $\tau$     | Student-t <sup>+</sup> ( $\nu = 4, \mu = 0, \sigma = 1$ )                                                                                     |
| Overdispersion                           | $\phi^N$   | $\phi^N = \left(\frac{1}{\xi^N}\right)^2$                                                                                                     |
|                                          | $\xi^N$    | Normal <sup>+</sup> ( $\mu = 0, \sigma = 1$ )                                                                                                 |
|                                          | $\phi^I$   | $\phi^I = \left(\frac{1}{\xi^I}\right)^2$                                                                                                     |
|                                          | $\xi^I$    | Normal <sup>+</sup> ( $\mu = 0, \sigma = 1$ )                                                                                                 |
| Time from infection to new case          | $p_{IN}$   | Lognormal( $\mu, \sigma$ )                                                                                                                    |
|                                          | $\mu$      | Normal( $\mu = 2.47, \sigma = 0.45$ )                                                                                                         |
|                                          | $\sigma$   | Gamma( $\alpha = 2.00, \beta = 4.48$ )                                                                                                        |
| Generation time                          | $p_G$      | Weibull( $\alpha = 3.28, \kappa = 6.12$ )                                                                                                     |
| Initially infected subjects              | $I_{j-33}$ | Exponential( $\frac{1}{\lambda}$ )                                                                                                            |
|                                          | $\lambda$  | Exponential(1)                                                                                                                                |

**Table 2.** Prior choices for model parameters.

### 1.13 Model parameter estimation

Model parameters are estimated with a Bayesian approach. Specifically, Markov chain Monte Carlo (MCMC) sampling is used as implemented by the Hamiltonian Monte Carlo algorithm with the No-U-Turn Sampler (NUTS) from Stan 2.19.2<sup>16</sup>. If not stated otherwise, we report posterior means and credible intervals (CrIs) based on the 2.5% and 97.5% quantile of the posterior samples.

Each model is estimated with 4 Markov chains and 2,000 iterations of which the first 1,000 iterations are discarded as part of the warm-up. Estimation power is evaluated via the ratio of the effective sample size ( $\hat{n}_{\text{eff}}/N$ ), and convergence of the Markov chains is assessed with the Gelman-Rubin convergence diagnostic ( $\hat{R}$ ). Further checks pertain to the detection of influential observations and correlations between the parameters of interest.

## 268 **1.14 Ignoring undetected infections**

269 In our considerations, we ignore that probably many infected subjects remain undetected as we  
270 implicitly assume that all infected case are detected ( $p_{\text{IN}}(t)$  sums up to 1). Formally, we could try  
271 to take this into account by introducing the probability of an infected case to be observed. However,  
272 this would act mainly on the global intercept  $\alpha'$  (except that the shape of a negative binomial  
273 distribution depends slightly on the actual sample size). Hence it seems to be safe to ignore this.



## 2 Methodological aspects and comparison with related work

Flaxman et al.<sup>9</sup> were the first who attempted to link NPIs to observed cases or deaths using a semi-mechanistic Bayesian hierarchical model. Both the study by Brauner et al.<sup>17</sup> and our study can be seen as extensions of this approach, thereby making use in particular of data from more countries. This also implies the possibility of refined modeling.

The above studies have in common that they model the effect of the NPIs on the number of new infections. Whereas the other studies approached this by modeling explicitly the effect on the reproduction number, we directly modelled the number of new infections in relation to the number of contagious subjects. Thereby, the generation time distribution was used in a way to approximate the time from infection to becoming contagious<sup>1</sup>.

A further common property of the above studies is the use of prior information on the distribution of certain quantities that play a central role in the spread of infectious diseases. Flaxman et al. equal the generation time distribution with the serial distribution, whereas Brauner et al. and our study avoid this, considering that there can be a substantial difference between these distributions<sup>10</sup>. Brauner et al. estimated the generation time distribution from their data on cases and deaths using an informative prior, whereas we made use of an explicit assumption based on prior knowledge. The second quantity used in both studies is the time from infection to reporting, which is assumed to be known by Flaxman et al. and estimated by Brauner et al. and our study. Similar to the other studies, we investigated the sensitivity of the estimated NPI effects with respect to the assumptions made or the priors chosen.

A specific property of our approach is to take the regional variation in the implementation of NPIs explicitly into account. We approached this by incorporating the share of the country's total population that is affected by active NPIs in our model. The other studies ignored this variation or restricted the analysis to countries with no or very little regional variation. A further specific property was to allow for a gradual increase in the response to NPIs over the first few days, whereas the other studies assumed a full response on the first day NPIs were implemented.

### 3 Simulation-based study

The close succession in which NPIs were implemented and the complexity of our model may raise concerns regarding the identifiability of the effects of NPIs. To alleviate such concerns, we conduct a simulation-based study in order to show that our model can recover the true effects.

The simulation-based study is conducted as follows. First, we set our model parameters to fixed values. For the effects of the NPIs  $\theta_m$ , we consider two scenarios as described below. All nuisance parameters are set to their prior mean (e.g.,  $\mu^{PIN}$  and  $\sigma^{PIN}$ ) or close to their posterior mean from our default model (e.g., in the case of  $\delta_j$ ). Second, we simulate fake data for the number of new cases from our model based on the NPIs that were implemented in each country over time (but with hypothetical effects  $\theta_m$  assigned to them). Third, the simulated number of new cases are used as model input for estimating the effects of NPIs.

Two scenarios are considered to check whether our model can recover the true effects  $\theta_m$ . In the first scenario, we assign a large effect to one NPI ( $\theta_{\text{School closure}} = 0.5$ ), a modest effect to a second NPI ( $\theta_{\text{Bans on small gatherings}} = 0.25$ ), and small effects to all other NPIs ( $\theta_{m \setminus \{\text{School closure, Bans on large gatherings}\}} = 0.05$ ). This scenario is intended to show that our model can identify large effects and distinguish them from small ones. In the second scenario, we assign a modest effect to all NPIs ( $\theta_m = 0.15$ ). This scenario is intended to show that the timing of NPIs does not influence our estimation, which is something we were concerned about after seeing that the most effective measures in our study were the ones implemented earlier.

The results from our simulation-based study are shown in Fig 4. As expected, there is considerable uncertainty in the estimated effects in both scenarios, but the estimated effects are reasonably close to the true effects. More importantly, the credible intervals contain the true effect in most simulations. In fact, we would expect the credible interval to contain the true effect 95% of the time. Note that our estimated proportions may approach the 95% as we increase the number of simulations. Overall, our simulation-based study suggests that our model can identify the effects of NPIs.

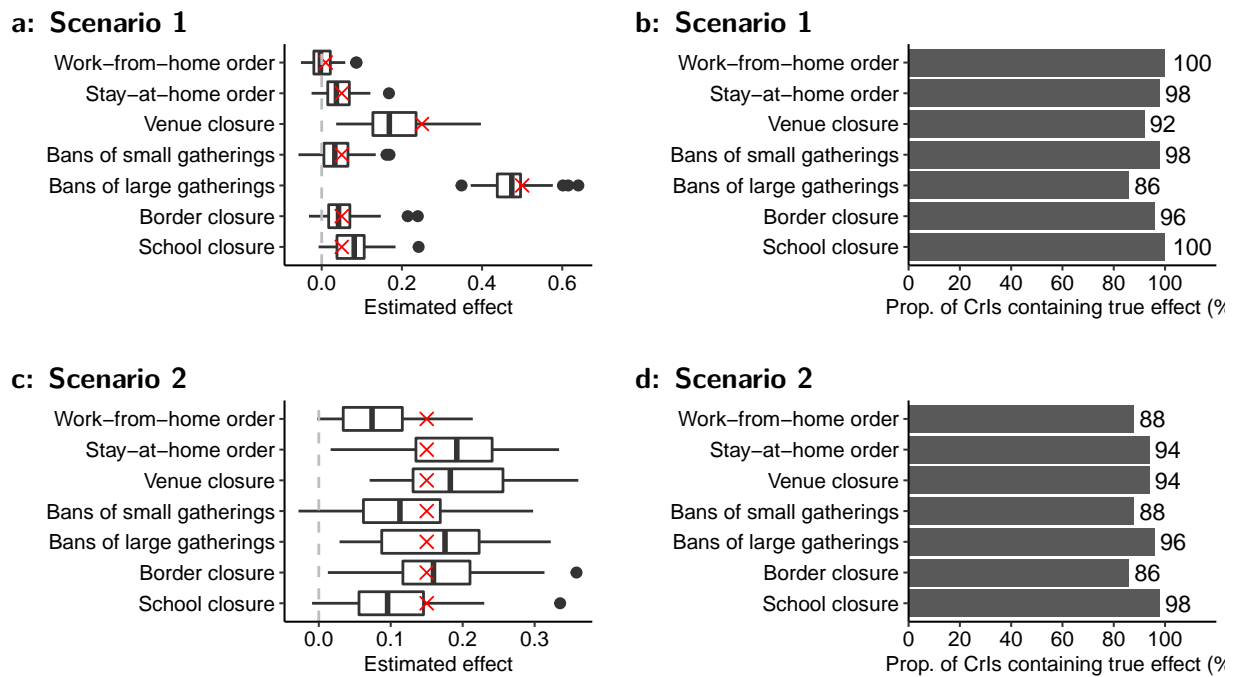

**Fig 4.** Estimated effects based on 50 simulations of fake data for scenario 1 (first row) and 2 (second row), respectively. **(a,c)** Boxplot of the estimated effects (posterior mean with the true effect in red, respectively). **(b,d)** Proportion of simulations where the posterior credible intervals (CrIs) contain the true effect.

## 4 Timing of non-pharmaceutical interventions

|                | Ban of<br>small<br>gather-<br>ings | School<br>closure | Venue<br>closure | Ban of<br>large<br>gather-<br>ings | Border<br>closure | Stay-at-<br>home<br>order | Work-<br>from-<br>home<br>order |
|----------------|------------------------------------|-------------------|------------------|------------------------------------|-------------------|---------------------------|---------------------------------|
| Australia      | 4.0                                | 7.0               | 3.0              | 4.1                                | 3.0               | 3.2                       |                                 |
| Austria        | 5.0                                | 3.0               | 3.0              | 3.0                                | 3.0               | 3.0                       |                                 |
| Belgium        | 4.0                                | 2.0               | 2.0              | 2.0                                | 2.0               | 2.0                       |                                 |
| Canada         | 2.9                                | 2.5               | 2.5              | 5.0                                | 2.5               | 5.0                       | 6.0                             |
| Denmark        | 2.0                                | 2.0               | 2.0              | 2.0                                | 2.0               |                           |                                 |
| Finland        | 3.0                                | 3.0               | 3.0              | 3.0                                | 3.0               |                           |                                 |
| France         | 1.0                                | 1.0               | 1.0              | 1.0                                | 1.0               | 1.0                       | 1.0                             |
| Germany        | 3.9                                | 3.1               | 3.0              | 6.1                                |                   | 4.0                       |                                 |
| Greece         | 1.0                                | 2.0               | 1.0              | 4.0                                |                   | 5.0                       |                                 |
| Ireland        | 3.0                                | 3.0               | 3.0              | 13.0                               |                   | 13.0                      | 13.0                            |
| Italy          | 4.0                                | 4.0               | 4.9              | 4.0                                | 4.0               | 4.9                       | 4.0                             |
| Luxembourg     | 5.0                                | 1.0               | 1.0              | 1.0                                |                   | 1.0                       | 1.0                             |
| Netherlands    | 4.0                                | 4.0               | 4.0              | 7.0                                |                   |                           |                                 |
| Norway         | 1.0                                | 1.0               | 1.0              |                                    | 3.0               |                           |                                 |
| Portugal       | 1.0                                | 1.0               | 6.0              | 6.0                                |                   | 6.0                       |                                 |
| Spain          | 1.7                                | 1.2               | 1.4              | 1.3                                | 1.4               | 1.3                       | 13.0                            |
| Sweden         | 16.0                               |                   |                  | 16.0                               |                   |                           |                                 |
| Switzerland    | 16.9                               | 1.5               | 1.5              | 3.3                                | 5.2               |                           | 2.0                             |
| United Kingdom | 4.0                                | 3.0               | 3.0              | 3.0                                |                   | 3.0                       |                                 |
| United States  | 1.8                                | 2.0               | 3.0              | 2.0                                | 2.3               | 8.2                       | 7.1                             |
| Average        | 4.3                                | 2.5               | 2.6              | 4.6                                | 2.7               | 4.3                       | 5.9                             |

**Table 3.** Distance (in days) to the next NPIs in time per contry and NPI. “Average” is the mean distance over all countries. Computation: For each NPI, the distance is measured as the absolute difference (in days) to the NPI that was implemented closest before or after, which is then averaged across countries. For countries where NPIs were implemented at the regional level, the absolute differences were first averaged over all regions. If an NPI was not implemented, then the absolute difference is omitted from computation.

|                         | Ban of large gatherings | School closure | Venue closure | Ban of small gatherings | Border closure | Stay-at-home order | Work-from-home order |
|-------------------------|-------------------------|----------------|---------------|-------------------------|----------------|--------------------|----------------------|
| Ban of large gatherings | 0.0                     | 4.1            | 4.3           | 7.4                     | 7.6            | 9.1                | 12.4                 |
| School closure          | 4.1                     | 0.0            | 2.5           | 4.4                     | 5.4            | 6.4                | 8.9                  |
| Venue closure           | 4.3                     | 2.5            | 0.0           | 3.4                     | 4.8            | 4.9                | 7.1                  |
| Ban of small gatherings | 7.4                     | 4.4            | 3.4           | 0.0                     | 5.2            | 2.7                | 6.9                  |
| Border closure          | 7.6                     | 5.4            | 4.8           | 5.2                     | 0.0            | 6.8                | 7.8                  |
| Stay-at-home order      | 9.1                     | 6.4            | 4.9           | 2.7                     | 6.8            | 0.0                | 4.7                  |
| Work-from-home order    | 12.4                    | 8.9            | 7.1           | 6.9                     | 7.8            | 4.7                | 0.0                  |

**Table 4.** Pairwise average distance (in days) between the implementation of NPIs across countries. Computation: For each pair of NPIs, the distance is measured as the absolute difference (in days) between the implementation dates of NPIs, which is then averaged across countries. For countries where NPIs were implemented at the regional level, the absolute differences were first averaged over all regions. If an NPI was not implemented, then the absolute difference is omitted from computation.

## 5 Estimation results

### 5.1 Estimated model parameters

Table 5 presents posterior means and credible intervals for all model parameters. See the main paper for a discussion of the effects of NPIs. Here we briefly discuss some of the additional model parameters.

The ratio of the effective sample size ( $\hat{n}_{\text{eff}}/N$ ) and the Gelman-Rubin convergence diagnostic ( $\hat{R}$ ) indicates good estimation power. It further suggests that the Markov chains converged.

There is a country-specific variation in the intercept parameter ( $\alpha_j$ ), reflecting differences in the rate of new cases – i.e., spread of the disease – in the absence of any NPI. Australia, Norway and Sweden are among the countries with lowest estimated rate and Canada, Ireland, and the US are among the countries with highest estimated rate.

The expected number of new infections at start of the non-modeling phase is around 4, but the exact number varies between countries, with around 11 infected in Australia and 1 infected in the US.

The overdispersion parameter ( $\phi$ ) can be rather precisely estimated to be in the magnitude of 4 for the number of new cases and 8 for the number of new infections, i.e., we are far away from the case of no overdispersion ( $\phi = \infty$ ). This coincides with the empirical observation of rather unsmooth trajectories in each country (Section 7).

The posterior distribution of the parameters of the log normal distribution describing the time from infection to reporting suggest that we can estimate them with a rather high precision (Fig 5a-b). The posterior mean of  $\mu^{PIN} = 2.62$  and  $\sigma^{PIN} = 0.18$  corresponds to a mean delay of about 15 days, which is slightly higher when compared to the prior. The posterior distribution of sigma is placed distinctly below the prior mean value of 0.4. Both together implies a rather precise posterior knowledge about the distribution of the time from infection to reporting with a range from roughly 8 to 25 days.

|                | Mean  | Lower CrI | Upper CrI | $\hat{n}_{\text{eff}}/N$ | $\hat{R}$ |
|----------------|-------|-----------|-----------|--------------------------|-----------|
| $\alpha$       | 0.83  | 0.73      | 0.94      | 0.24                     | 1.00      |
| $\tau$         | 0.20  | 0.13      | 0.29      | 0.67                     | 1.00      |
| $\alpha_1$     | -0.32 | -0.48     | -0.17     | 0.35                     | 1.00      |
| $\alpha_2$     | -0.11 | -0.27     | 0.04      | 0.36                     | 1.00      |
| $\alpha_3$     | 0.18  | 0.04      | 0.33      | 0.32                     | 1.00      |
| $\alpha_4$     | 0.24  | 0.10      | 0.38      | 0.27                     | 1.00      |
| $\alpha_5$     | -0.12 | -0.28     | 0.04      | 0.33                     | 1.00      |
| $\alpha_6$     | -0.05 | -0.21     | 0.12      | 0.26                     | 1.00      |
| $\alpha_7$     | 0.16  | 0.02      | 0.32      | 0.30                     | 1.00      |
| $\alpha_8$     | 0.02  | -0.12     | 0.15      | 0.35                     | 1.00      |
| $\alpha_9$     | -0.13 | -0.29     | 0.02      | 0.34                     | 1.00      |
| $\alpha_{10}$  | 0.20  | 0.05      | 0.36      | 0.38                     | 1.00      |
| $\alpha_{11}$  | 0.06  | -0.06     | 0.19      | 0.32                     | 1.00      |
| $\alpha_{12}$  | -0.18 | -0.35     | -0.01     | 0.32                     | 1.00      |
| $\alpha_{13}$  | 0.01  | -0.13     | 0.16      | 0.33                     | 1.00      |
| $\alpha_{14}$  | -0.25 | -0.41     | -0.10     | 0.35                     | 1.00      |
| $\alpha_{15}$  | 0.01  | -0.14     | 0.16      | 0.33                     | 1.00      |
| $\alpha_{16}$  | 0.12  | -0.02     | 0.26      | 0.31                     | 1.00      |
| $\alpha_{17}$  | -0.18 | -0.35     | 0.00      | 0.19                     | 1.01      |
| $\alpha_{18}$  | 0.00  | -0.15     | 0.16      | 0.21                     | 1.01      |
| $\alpha_{19}$  | 0.04  | -0.10     | 0.17      | 0.37                     | 1.00      |
| $\alpha_{20}$  | 0.33  | 0.20      | 0.47      | 0.30                     | 1.00      |
| $\theta_1$     | 0.17  | -0.02     | 0.36      | 0.45                     | 1.00      |
| $\theta_2$     | 0.10  | -0.02     | 0.21      | 0.30                     | 1.00      |
| $\theta_3$     | 0.37  | 0.21      | 0.50      | 0.09                     | 1.02      |
| $\theta_4$     | 0.09  | -0.04     | 0.23      | 0.36                     | 1.00      |
| $\theta_5$     | 0.18  | -0.04     | 0.40      | 0.16                     | 1.01      |
| $\theta_6$     | 0.04  | -0.06     | 0.17      | 0.43                     | 1.00      |
| $\theta_7$     | 0.01  | -0.08     | 0.12      | 0.64                     | 1.00      |
| $\lambda$      | 4.41  | 2.39      | 7.32      | 0.14                     | 1.00      |
| $I_{1-33}$     | 11.02 | 3.08      | 24.93     | 0.18                     | 1.01      |
| $I_{2-33}$     | 7.20  | 1.84      | 17.59     | 0.22                     | 1.00      |
| $I_{3-33}$     | 1.22  | 0.14      | 3.59      | 0.34                     | 1.00      |
| $I_{4-33}$     | 1.04  | 0.10      | 3.28      | 0.27                     | 1.00      |
| $I_{5-33}$     | 7.94  | 2.07      | 18.97     | 0.19                     | 1.01      |
| $I_{6-33}$     | 2.83  | 0.42      | 8.02      | 0.21                     | 1.00      |
| $I_{7-33}$     | 1.90  | 0.30      | 5.45      | 0.25                     | 1.00      |
| $I_{8-33}$     | 5.07  | 1.30      | 12.67     | 0.20                     | 1.01      |
| $I_{9-33}$     | 3.99  | 0.80      | 10.17     | 0.23                     | 1.00      |
| $I_{10-33}$    | 1.28  | 0.15      | 3.99      | 0.41                     | 1.00      |
| $I_{11-33}$    | 5.29  | 1.38      | 12.73     | 0.18                     | 1.01      |
| $I_{12-33}$    | 10.50 | 2.73      | 25.32     | 0.21                     | 1.00      |
| $I_{13-33}$    | 3.62  | 0.76      | 9.27      | 0.29                     | 1.00      |
| $I_{14-33}$    | 10.46 | 3.01      | 23.95     | 0.17                     | 1.00      |
| $I_{15-33}$    | 4.78  | 1.06      | 12.39     | 0.22                     | 1.01      |
| $I_{16-33}$    | 3.78  | 0.78      | 9.49      | 0.23                     | 1.00      |
| $I_{17-33}$    | 7.19  | 1.85      | 17.26     | 0.36                     | 1.00      |
| $I_{18-33}$    | 6.31  | 1.61      | 15.45     | 0.26                     | 1.00      |
| $I_{19-33}$    | 3.36  | 0.71      | 8.49      | 0.25                     | 1.00      |
| $I_{20-33}$    | 1.28  | 0.16      | 3.82      | 0.18                     | 1.01      |
| $\phi^N$       | 4.24  | 3.80      | 4.71      | 0.72                     | 1.00      |
| $\phi^I$       | 8.66  | 6.70      | 11.44     | 0.05                     | 1.02      |
| $\mu^{PIN}$    | 2.62  | 2.51      | 2.73      | 0.05                     | 1.03      |
| $\sigma^{PIN}$ | 0.18  | 0.11      | 0.27      | 0.29                     | 1.00      |

**Table 5.** Estimation results for the main analysis. The ratio  $\hat{n}_{\text{eff}} / N$  is the effective sample size ( $\hat{n}_{\text{eff}}$ ) divided by the total sample size ( $N$ ). Generally, ratios above 0.5 correspond to high, between 0.1 and 0.5 to medium and below 0.1 to low estimation power<sup>18</sup>.  $\hat{R}$  is the Gelman-Rubin convergence diagnostic<sup>19</sup>. A  $\hat{R} \approx 1.00$  indicates good convergence, while a  $\hat{R} > 1.10$  indicates bad convergence<sup>20</sup>.

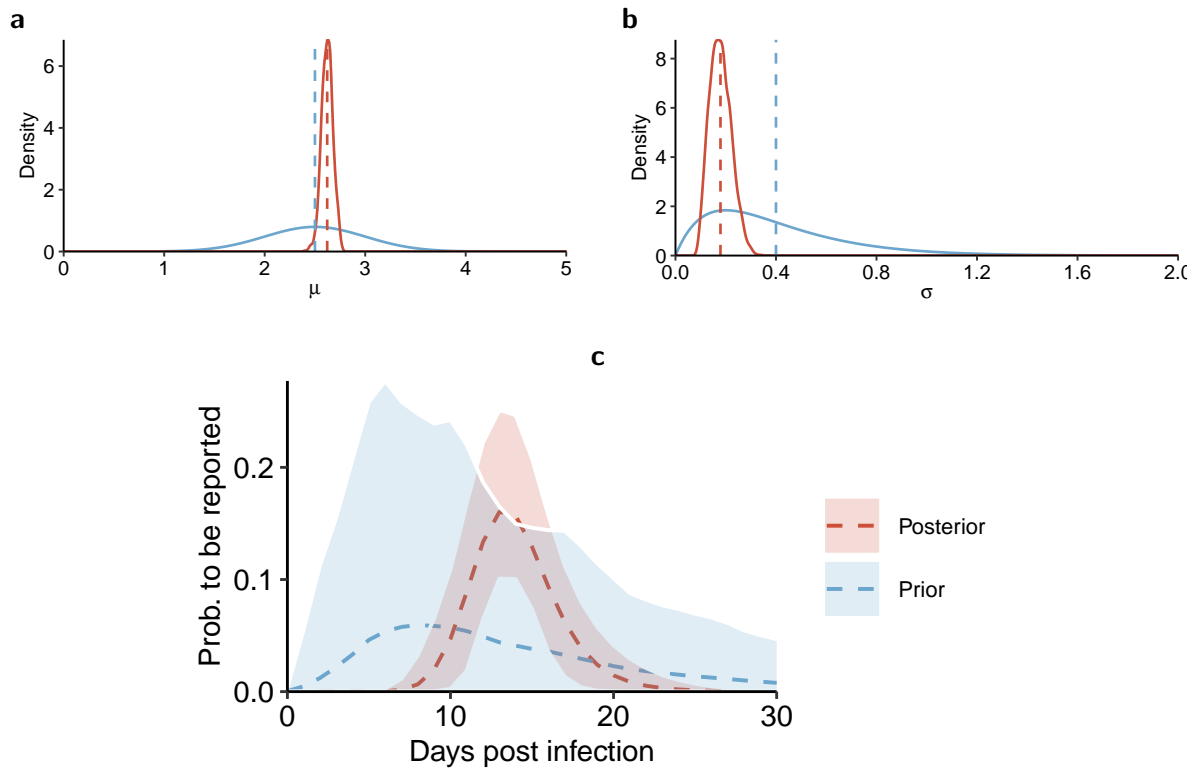

**Fig 5.** Distribution of the time from infection to reporting of a new case. **(a)** Log mean  $\mu$  (prior and posterior mean as dashed lines) **(b)** Log standard deviation  $\sigma$  (prior and posterior mean as dashed lines). **(c)** Posterior distribution of  $p_{IN}(t)$  for  $t = 0, 1, \dots, 30$  (prior and posterior mean as dashed lines with 95% range and 95% credible interval as shaded area, based on 4,000 draws from the prior and posterior distributions for  $\mu$  and  $\sigma$ , respectively).



## 353 **5.2 Checking for correlations between parameters**

354 A similar timing could make it difficult to distinguish the individual effects of NPIs. To investigate  
355 this issue, Fig 6 depicts the pairwise bivariate posterior distributions of the parameters of the NPIs.  
356 We observe a tendency towards negative correlations, reflecting the difficulty to distinguish the  
357 effects of NPIs, which were often introduced close in time. That is, highest negative correlations  
358 were observed for the pair of NPIs with the smallest average distance in implementation (Fig 4).

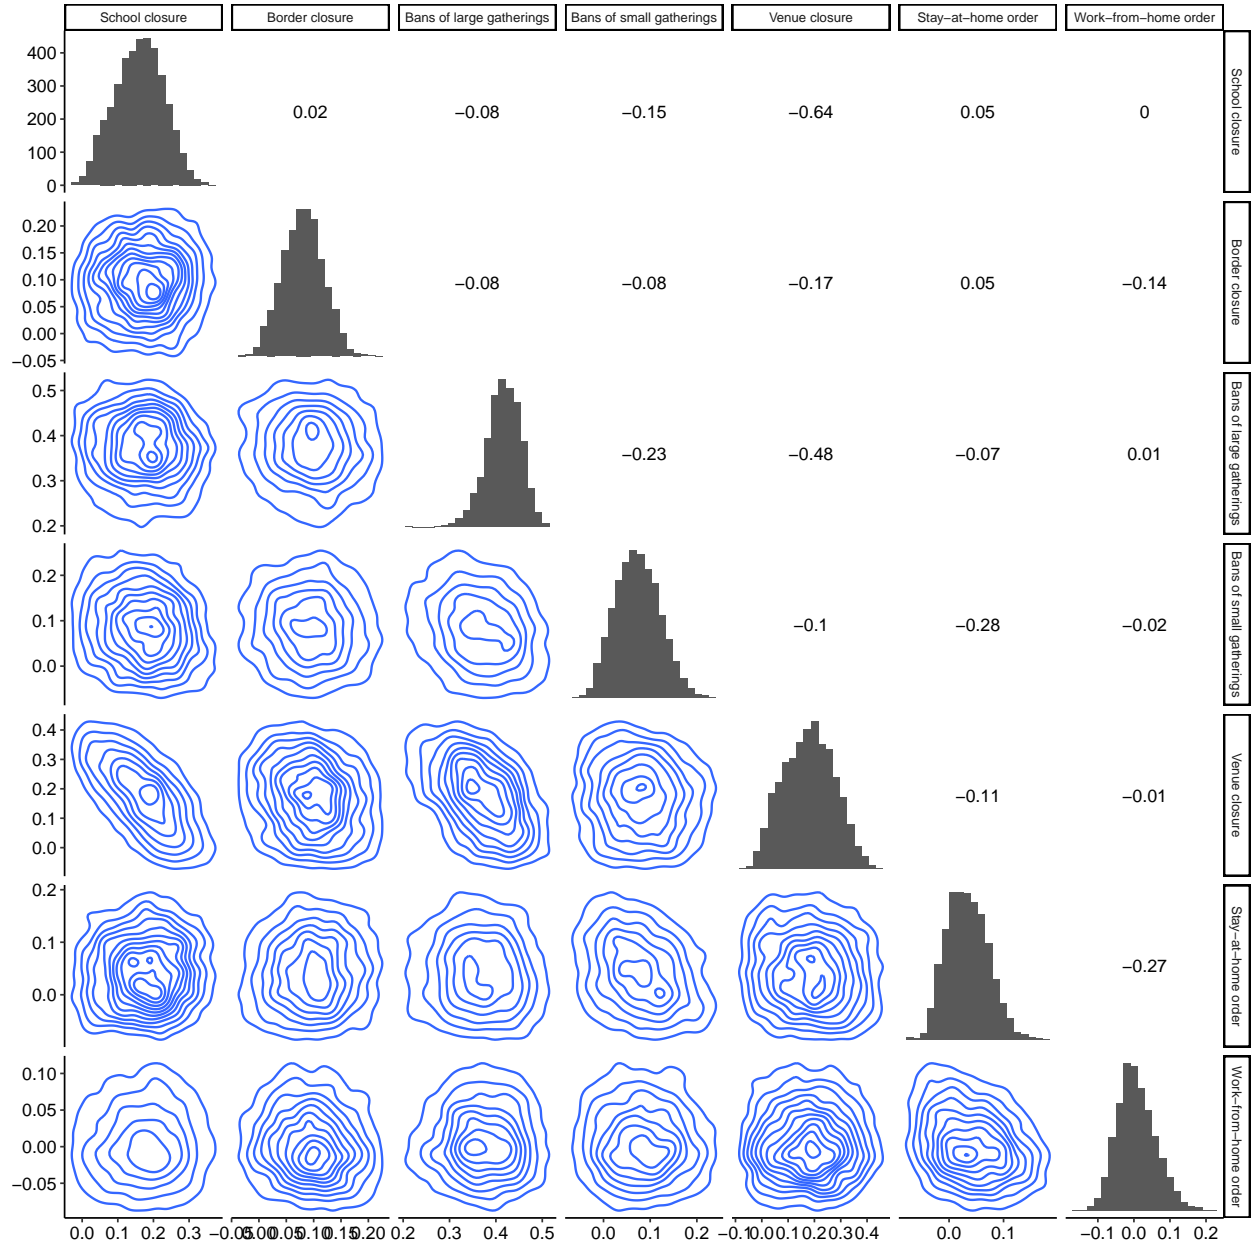

**Fig 6.** Bivariate posterior distributions visualized by contour plots (lower diagonal matrix) from the MCMC sample for the parameters of non-pharmaceutical interventions (NPIs). Pearson's  $r$  is shown in the upper diagonal matrix, and the marginal distribution is depicted as a histogram on the diagonal of the matrix.

### 359 **5.3 Checking for influential observations**

360 Influential observations can affect parameter estimates. To check for influential observations, Fig 7  
361 shows the tail shape parameter  $k$  from approximate leave-one-out cross-validation using Pareto  
362 smoothed importance sampling<sup>21</sup>. Only few observations seem to be highly influential.

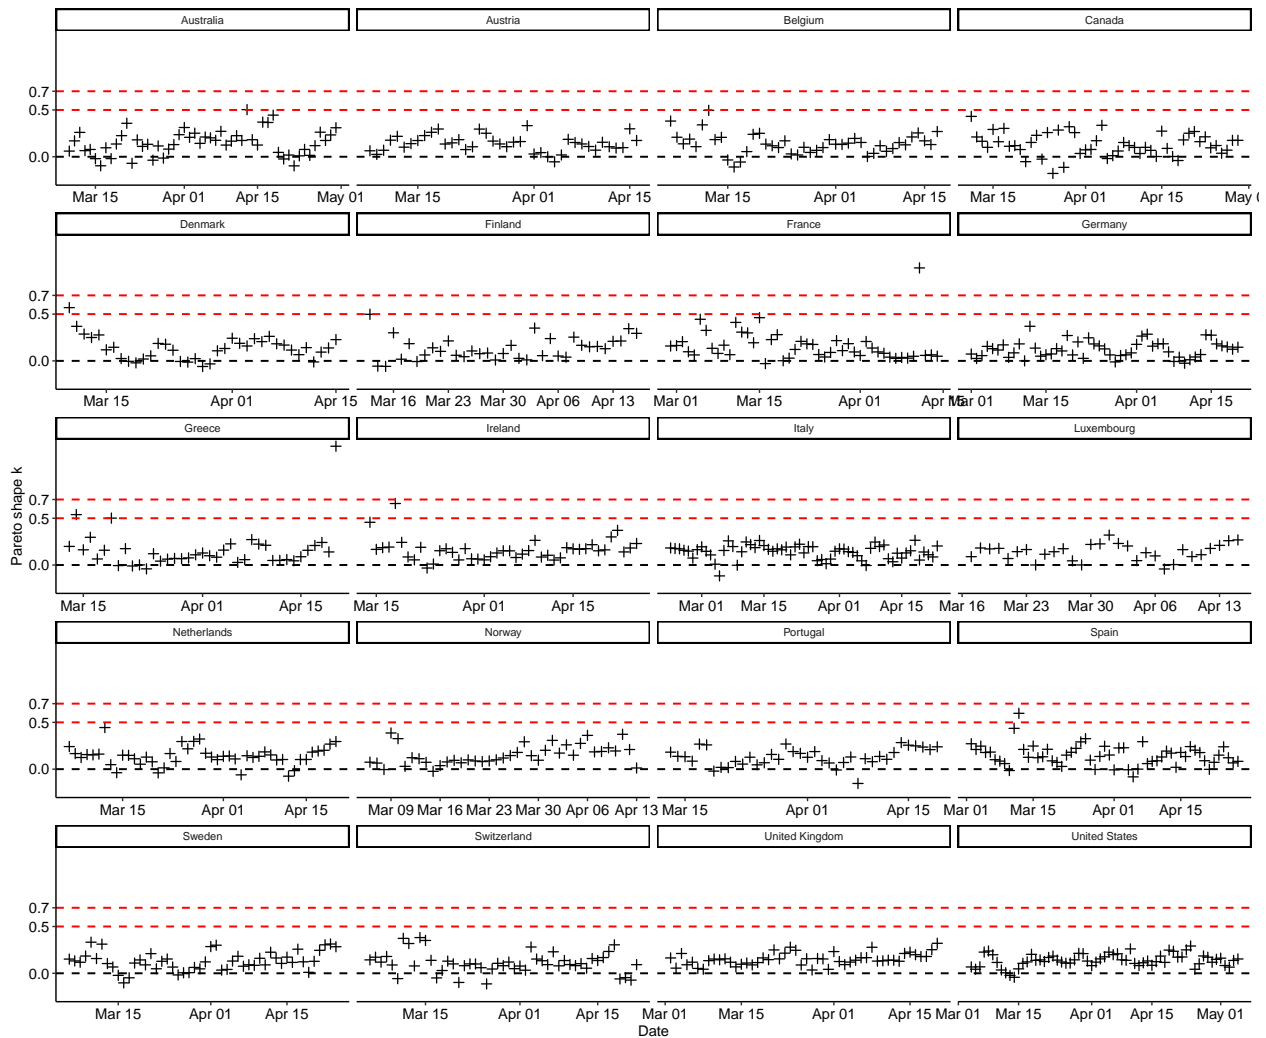

**Fig 7.** Model diagnostics based on influential observations. Shown is the tail shape parameter  $k$  of the generalized Pareto distribution from approximate leave-one-out cross-validation using Pareto smoothed importance sampling for each observation by country and time. Values below 0.5 indicate that the observation is not influential; values between 0.5 and 0.7 indicate that the observation might be influential but the model is usually still robust; values above 0.7 indicate the observation is influential and that the model may not be robust<sup>21</sup>.

## 6 Sensitivity analysis

### 6.1 Modeling phase starting from 10 cumulative cases onward

In the main model, the modeling phase starts after 100 cumulative cases were reported by a country. This is because countries needed time to set up documentation practices and thus the early reported cases numbers were very variable. Fig 8 shows the estimated NPI effects when modeling starts after 10 cumulative cases were reported. Overall, NPI effects are not sensitive to a start of the modeling phase after 50 or 100 cumulative cases were observed. The effects of ban of large gatherings, venue closure, and ban of small gatherings are sensitive to a very early start of the modeling phase after 10 cumulative cases, but it should be noted that case numbers were highly variable in the very beginning.

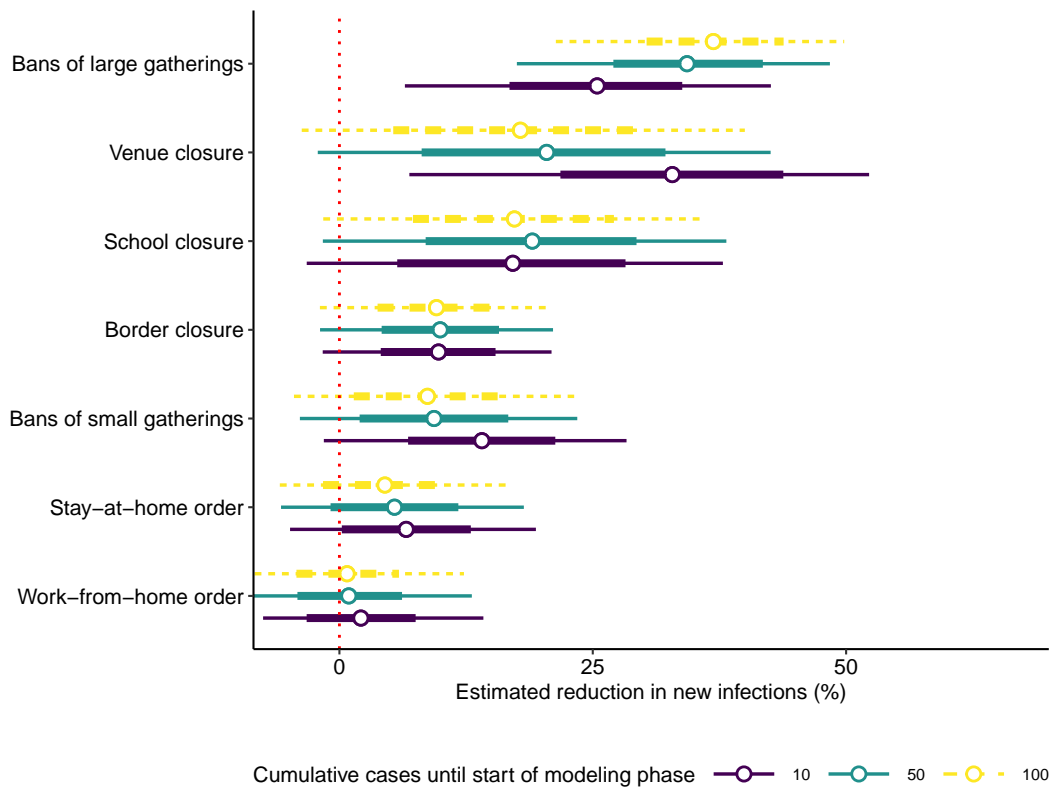

**Fig 8.** Reduction (posterior mean as dots with 80% and 95% credible interval as thick and thin lines, respectively) in the number of new infections (in %) for each non-pharmaceutical intervention (NPI) when varying the start of the modeling phase (default in main model as dashed yellow line).

## 6.2 Modeling phase ending 21 to 35 days after last NPI was implemented

In the main model, the modeling phase ends 28 days after the last NPI was implemented. This should provide enough time for the effect of NPIs to show up in the number of reported cases, thereby concluding the first wave of the epidemic. Fig 9 shows the estimated NPI effects when the end of the modeling phase is varied from 21 to 25 days after the last NPI was implemented within a country. NPI effects are a little sensitive to an earlier end of the modeling phase. The wider credible intervals for border closure, ban of small gatherings, stay-at-home order and work-from-home order could indicate that ending the modeling phase 21 days after the last NPI was implemented is a bit too early.

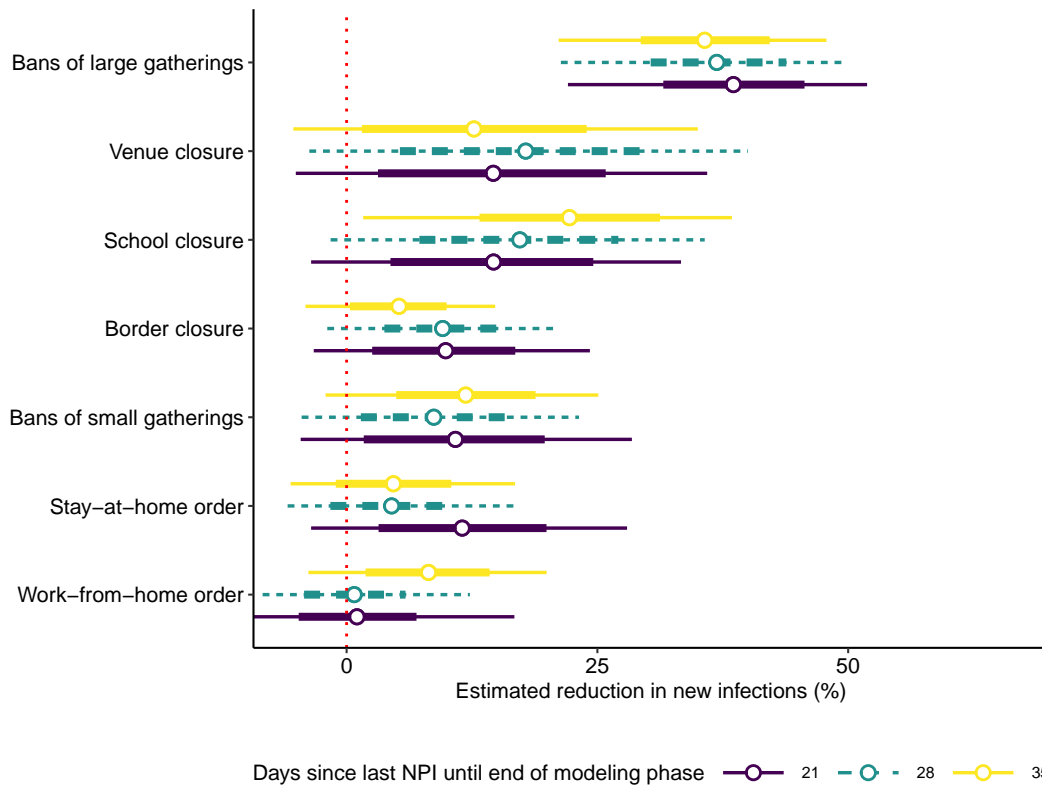

**Fig 9.** Reduction (posterior mean as dots with 80% and 95% credible interval as thick and thin lines, respectively) in the number of new infections (in %) for each non-pharmaceutical intervention (NPI) when varying the end of the modeling phase (default in main model as dashed turquoise line).

### 6.3 Varying the time-delayed response functions

In the main model, a time delayed response function was considered where the effect of an NPI increases linearly between  $t_0 = 0$  days and  $t_1 = 3$  days after their implementation. Fig 10 shows the estimated NPI effects when varying  $t_0$  and  $t_1$  considering the following alternatives for the first-order spline  $FOS(t_0, t_1)$ : a proactive response  $FOS(-1,0)$ , a quicker response  $FOS(0,1)$ , and a more delayed response  $FOS(0,5)$  as compared to the main model. Overall, the results are not sensitive to the choice of  $t_0$  and  $t_1$  in the FOS.

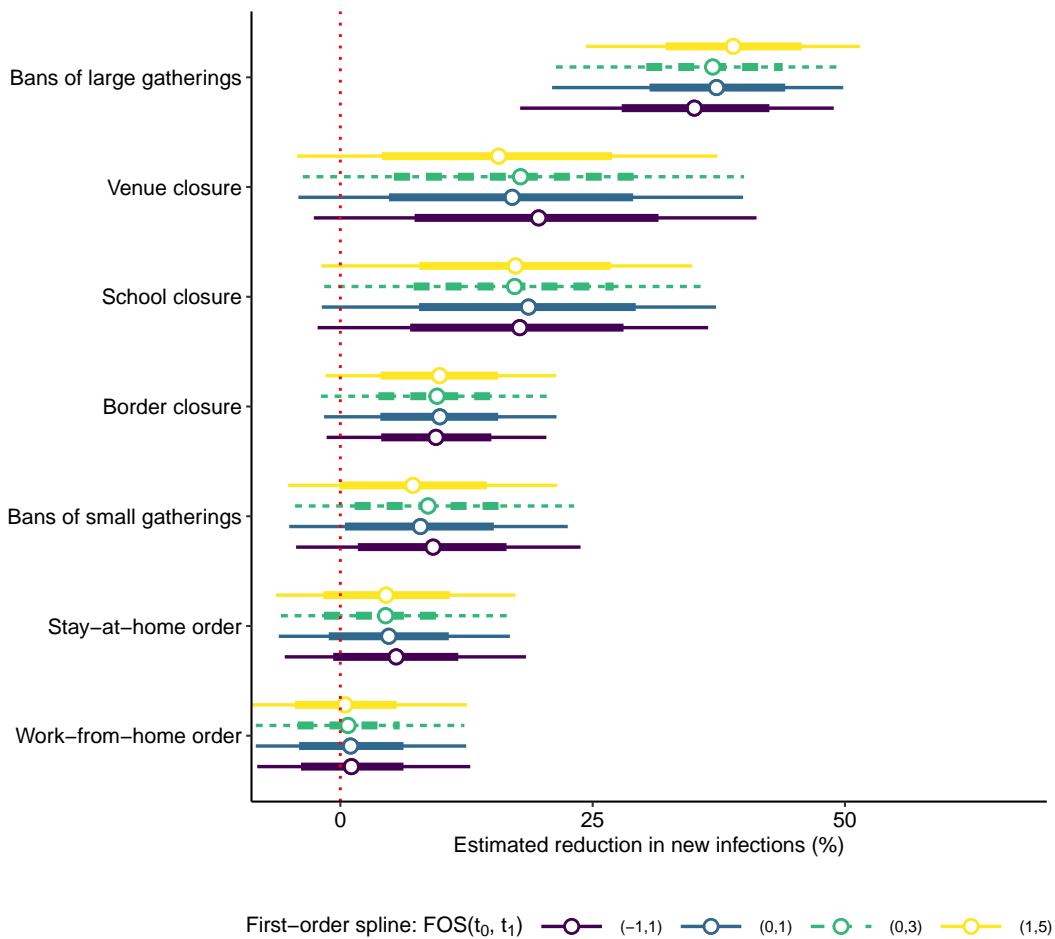

**Fig 10.** Reduction (posterior mean as dots with 80% and 95% credible interval as thick and thin lines, respectively) in the number of new infections (in %) for each non-pharmaceutical intervention (NPI) when varying time delayed response function (default in main model as dashed turquoise line).

## 6.4 Varying the prior distribution for the effects of non-pharmaceutical interventions

In the main model, a mixture prior for the NPI effects was constructed where the probability of a negative effect (i.e., NPIs leading to an increase in the number of new cases) is 10%. Fig 11 shows the estimated NPI effects when the prior probability of a negative effect of NPIs is alternatively 30% or 50%. The ranking of the posterior mean effects does not depend on the prior, but the range of effects for venue closure and work-from-home order would include larger negative effects when increasing the prior probability for a negative effect.

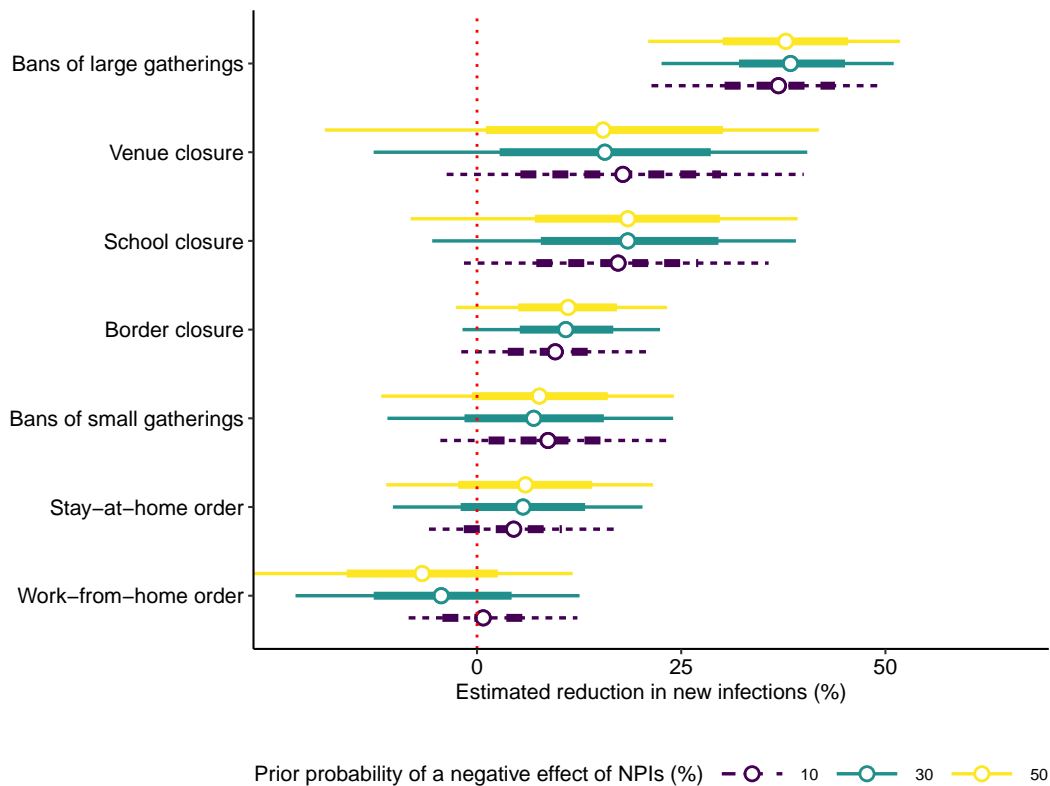

**Fig 11.** Reduction (posterior mean as dots with 80% and 95% credible interval as thick and thin lines, respectively) in the number of new infections (in %) for each non-pharmaceutical intervention (NPI) when varying the probability of a negative effect (in %) in the prior distribution for the effects of non-pharmaceutical interventions (default in main model as dashed purple line).



## 6.5 Varying the prior distribution for the time from infection to reporting of a new case

In the main model, the probability distribution for the time from infection to reporting of a new case  $p_{\text{IN}}(t)$  was inferred by estimating the log mean  $\mu$  and the log standard deviation  $\sigma$  of the assumed lognormal distribution. The specified priors in the main model correspond to a Normal( $\mu_0 = 2.47, \sigma_0 = 0.45$ ) for the log mean and Gamma( $\alpha_0 = 2, \beta_0 = 4$ ) for the log standard deviation, such that  $\mu = \mu_0 = 2.47$  and  $\sigma = \frac{\alpha_0}{\beta_0} = \frac{2.00}{4.48} \approx 0.45$  correspond to the prior means of a Lognormal( $\mu = 2.47, \sigma = 0.45$ ) that was obtained based on prior knowledge. For this sensitivity check,  $\mu_0$  and  $\beta_0$  were varied in the Normal prior for the log mean  $\mu$  and the Gamma prior for the log standard deviation  $\sigma$ , resulting in alternative probability distributions for  $p_{\text{IN}}(t)$  (Fig 12). Fig 13 shows the estimated NPI effects for this sensitivity check. Overall, NPI effects are not sensitive to the choice of priors for the parameters of  $p_{\text{IN}}(t)$ .

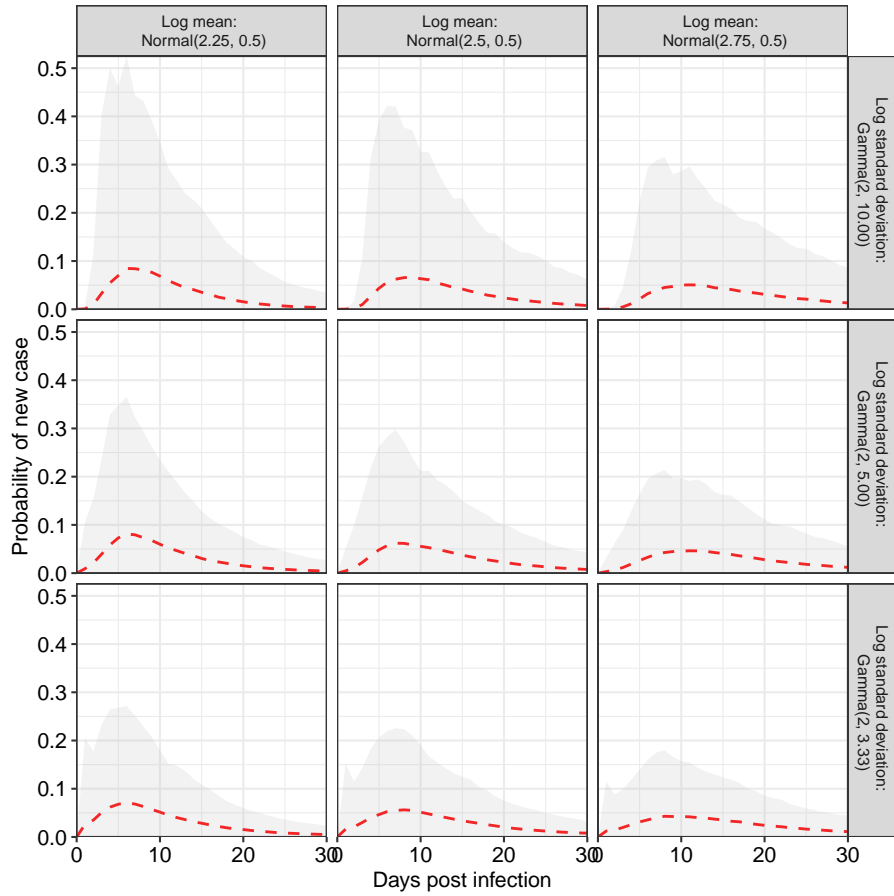

**Fig 12.** Prior choices for the distribution of the time from infection to reporting of a new case  $p_{IN}(t)$  depending on log mean  $\mu$  and log standard deviation  $\sigma$  (prior mean as dashed red line with 95 % range as shaded area, based on 4,000 independent draws from the distributions for the log mean  $\mu$  (column) in the sensitivity analysis (default in main model as middle tile).

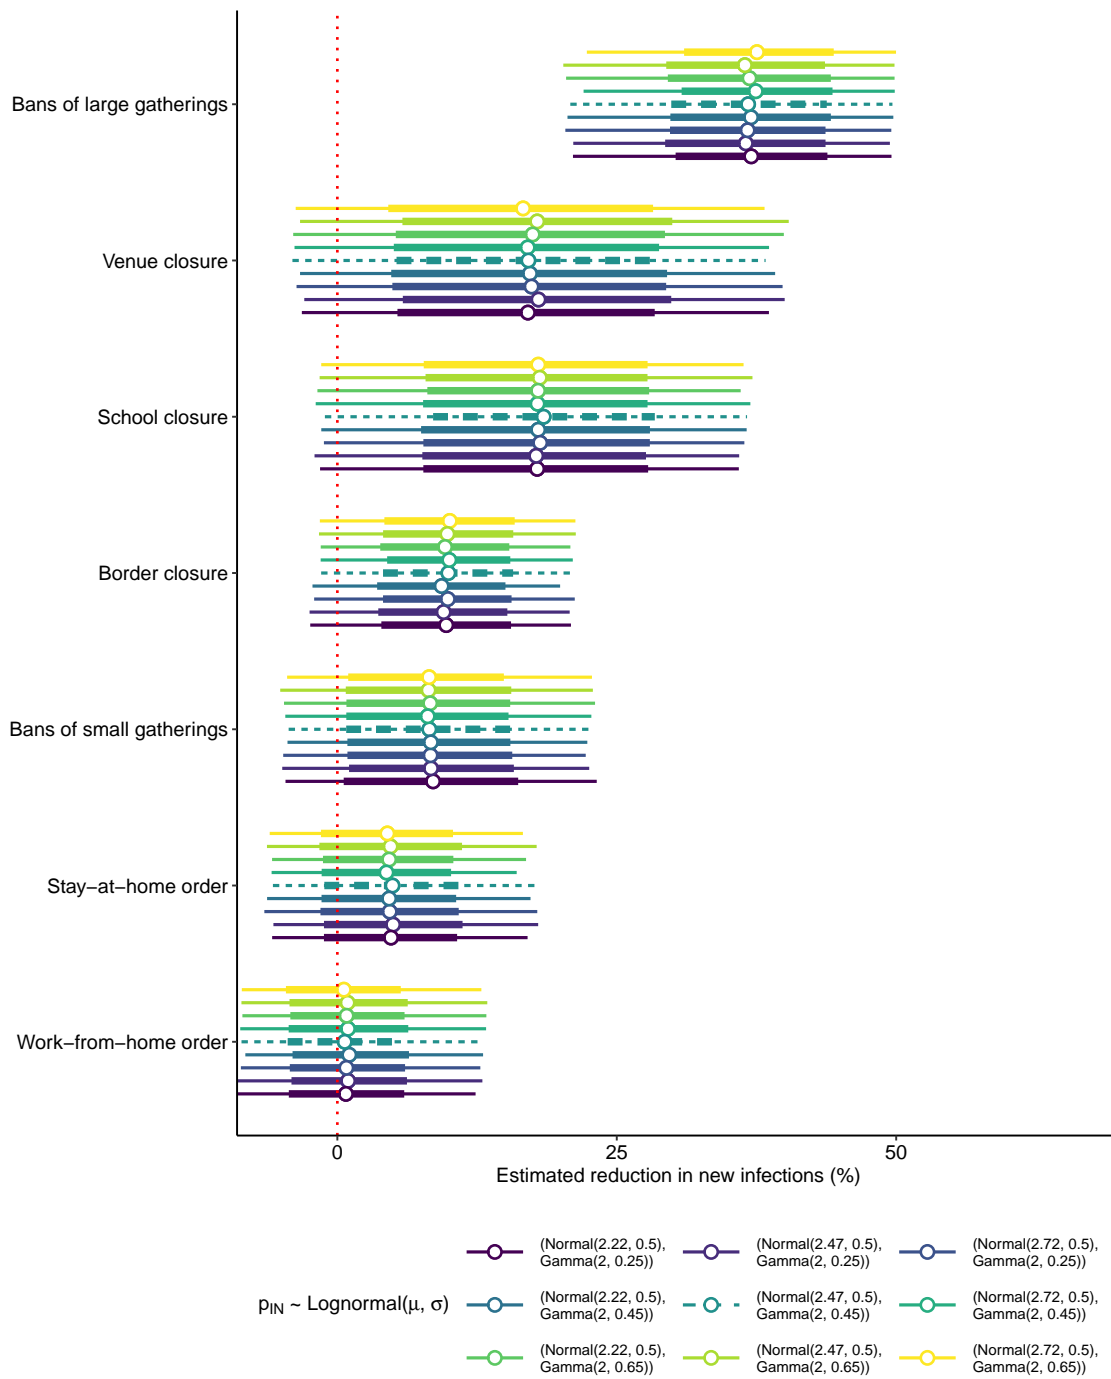

**Fig 13.** Reduction (posterior mean as dots with 80% and 95% credible interval as thick and thin lines, respectively) in the number of new infections (in %) for each non-pharmaceutical intervention (NPI) when varying the prior choices for distribution of the time from infection to reporting of a new case (default in main model as dashed turquoise line).

## 410 6.6 Varying the generation time distribution

411 In the main model, the generation time distribution  $p_G(t)$  was assumed to be a Weibull( $\alpha = 3.28, \beta =$   
412  $6.12$ )<sup>13</sup>. For this sensitivity check, the shape parameter  $\alpha$  and inverse scale parameter  $\beta$  were varied,  
413 resulting in the alternative probability distributions for  $p_G(t)$  (Fig 14). Fig 15 shows the estimated  
414 NPI effects for this sensitivity check. Overall, NPI effects are not very sensitive to the choice of  
415  $p_G(t)$ , except that the estimated effects tend to increase for longer generation times.

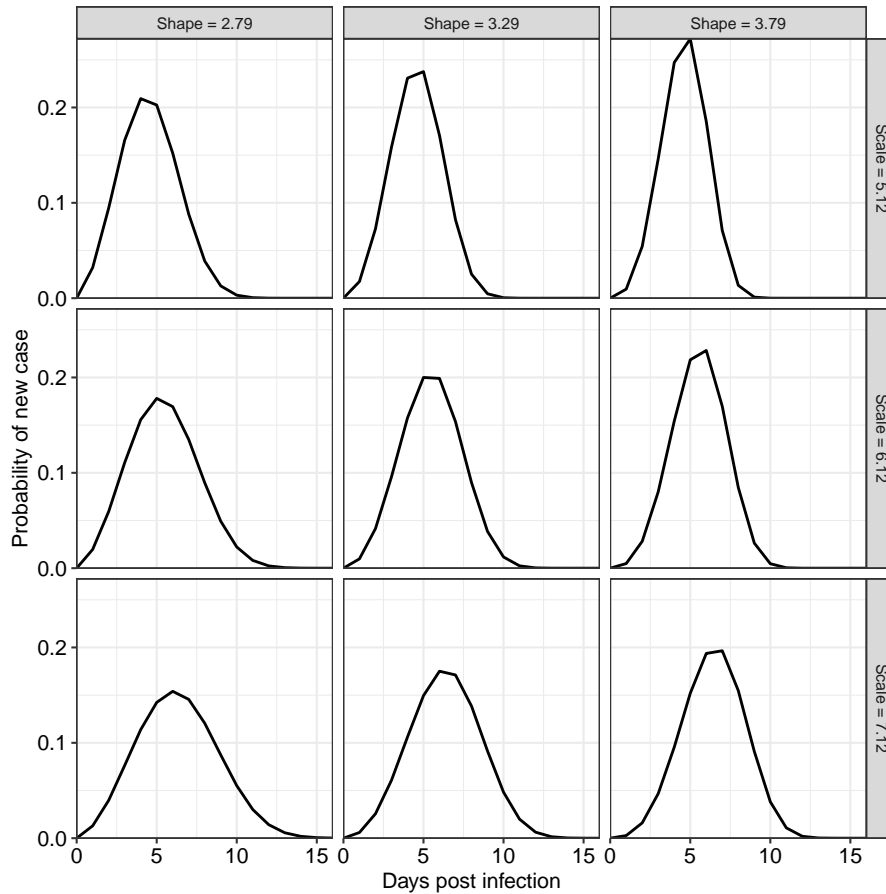

**Fig 14.** Prior choices for the generation time distribution  $p_G(t)$  depending on shape parameter  $\alpha$  and rate parameter  $\kappa$  in the sensitivity analysis (default in main model as middle tile).

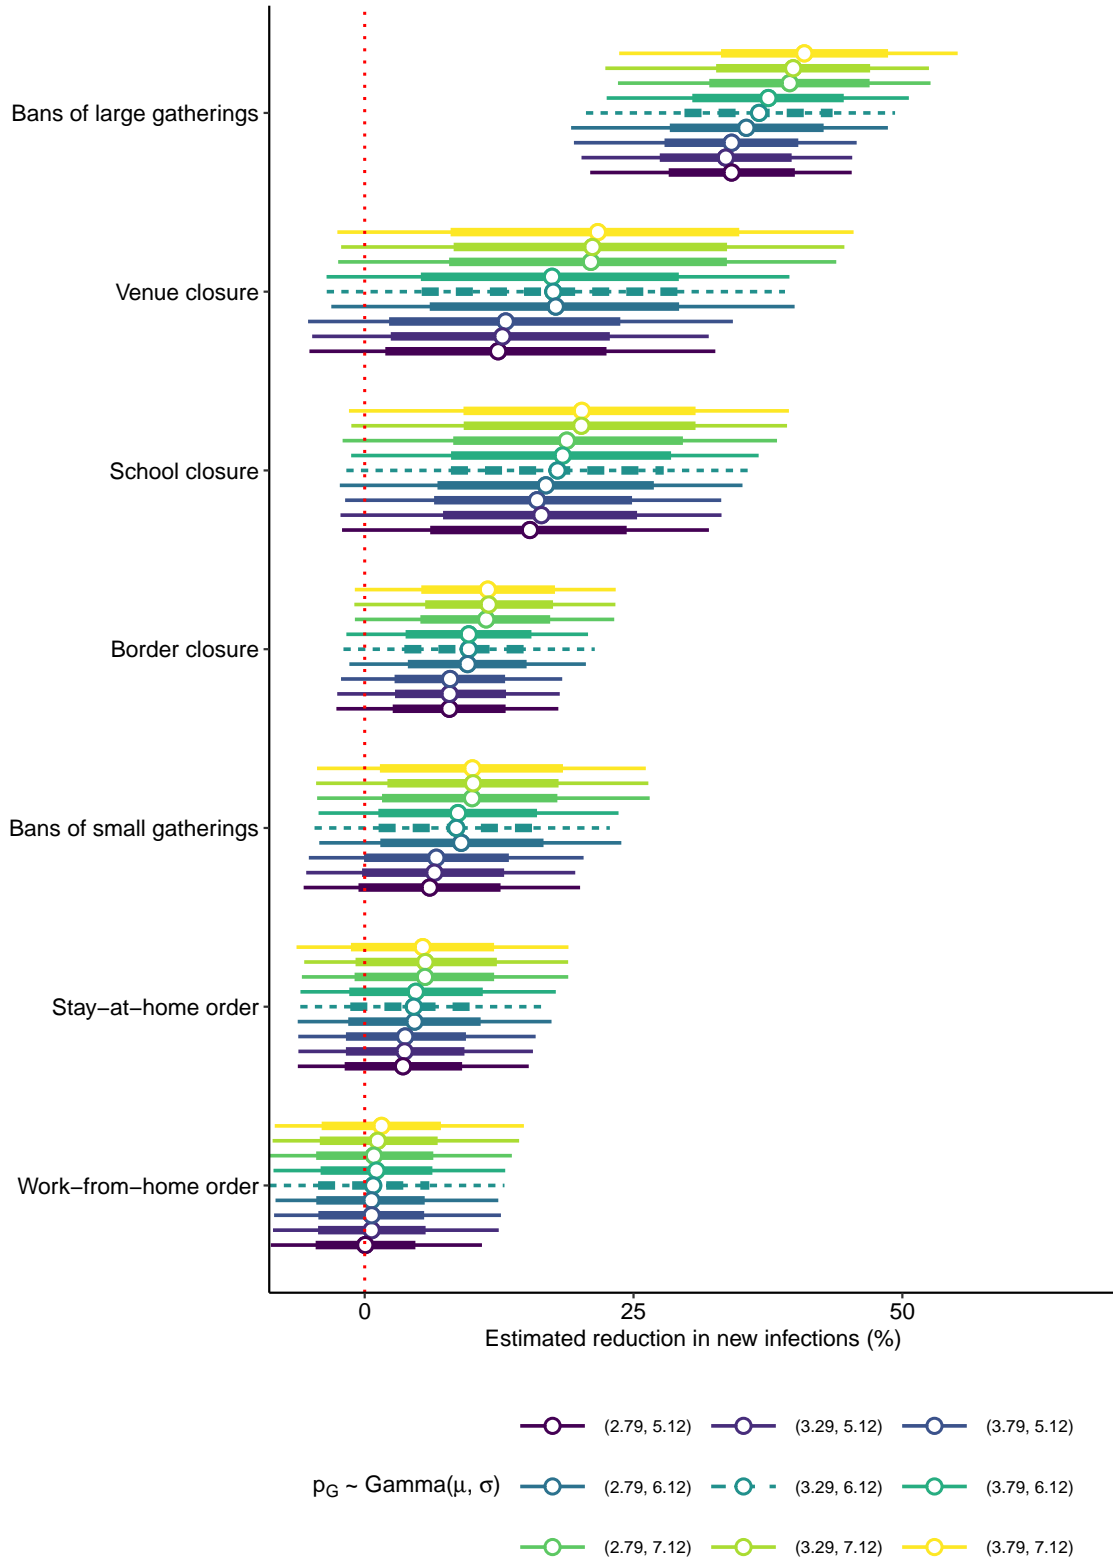

**Fig 15.** Reduction (posterior mean as dots with 80% and 95% credible interval as thick and thin lines, respectively) in the number of new infections (in %) for each non-pharmaceutical intervention (NPI) when varying the generation time distribution (default in main model turquoise as dashed line).

## 6.7 Analyzing the influence of leaving out one country at the time

A leave-one-out analysis was conducted to analyze the influence of individual countries for the estimated NPI effects, i.e., the model is re-estimated leaving out one country at a time. Fig 16 shows the results of this analysis for each NPI. Some estimated effects seem sensitive to the exclusion of individual countries.

The effect of school closure would be higher when estimating the model without Australia. This could implicate sensitivity or, instead, it could be that the particular country is informative for the estimated effect of a particular NPI. Australia is a good example to check for this, as here, school closures were implemented in Queensland, New South Wales, Victoria and Australian Capital Territory (Eastern Australia) but not in Western Australia, Northern Territory and South Australia (Western Australia). As a result, Australia was split into Eastern and Western Australia and the model was estimated leaving out one region at a time. This time, the effect of school closure is lower without Eastern Australia and higher without Western Australia (Fig 17). A reason for this could be that both regions successfully reduced the number of cases, but Western Australia did so with similar measures as Eastern Australia except for closing schools, thereby providing substantial evidence against the particular effectiveness of school closures.

The effect of bans of large gatherings would be higher without Switzerland and Sweden. Note that both countries implemented bans of large gatherings comparably early into the epidemic. Despite that, the number of new infections was still increasing in Switzerland for a couple of weeks and continuously in Sweden, thereby indicating that bans of large gatherings were potentially not as effective as in other countries.

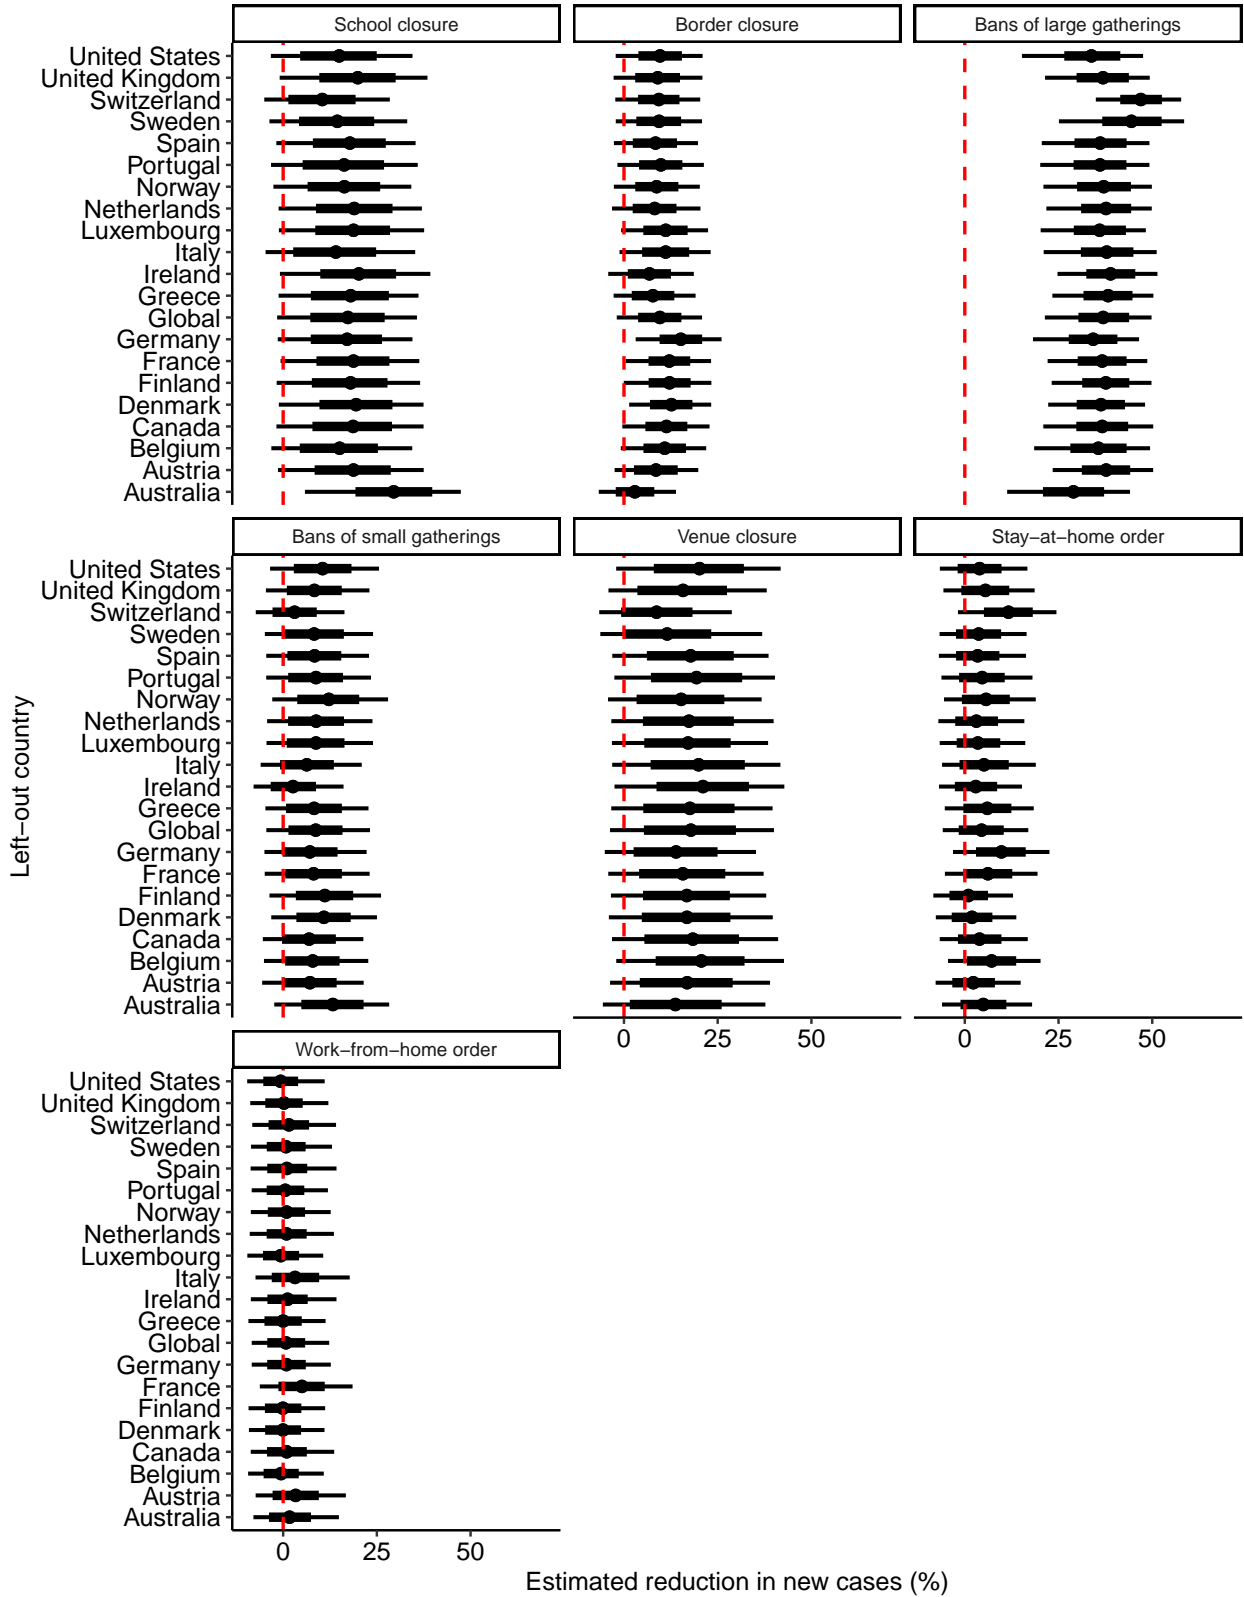

**Fig 16.** Reduction (posterior mean as dots with 80% and 95% credible interval as thick and thin lines, respectively) in the number of new infections (in %) for each non-pharmaceutical intervention (NPI) when leaving out one country at a time.

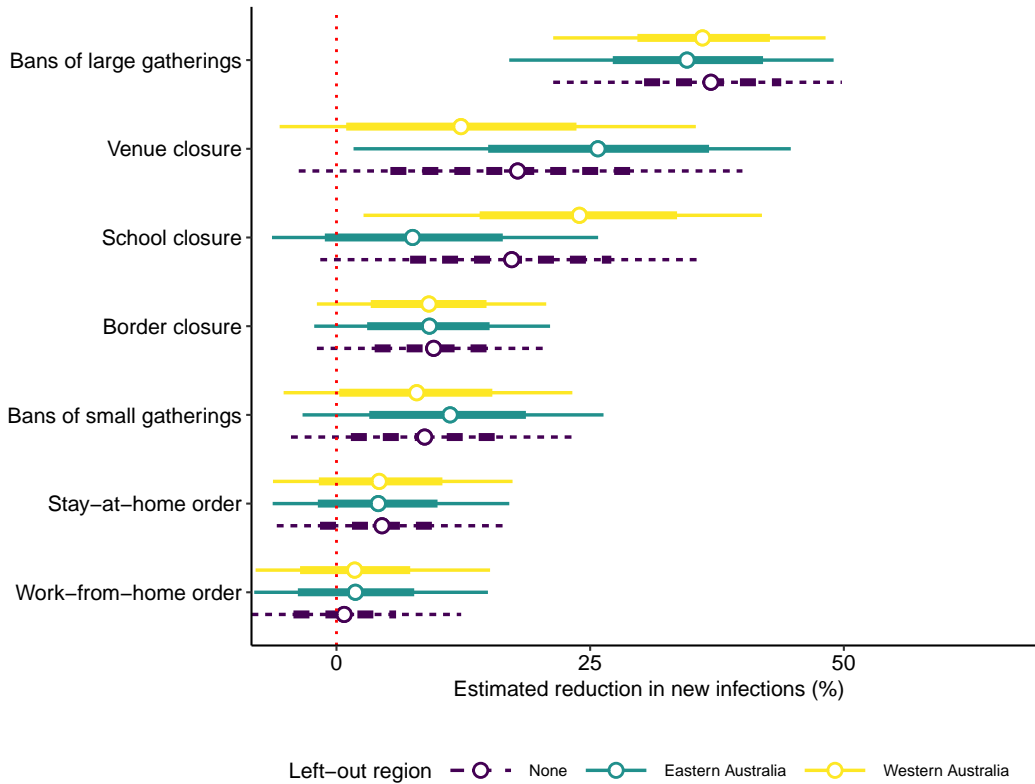

**Fig 17.** Reduction (posterior mean as dots with 80% and 95% credible interval as thick and thin lines, respectively) in the number of new infections (in %) for each non-pharmaceutical intervention (NPI) when dividing Australia into two sub-regions and leaving-out Eastern or Western Australia (default in main model as dashed line).



## 7 Visual inspection of the model fit

Fig 18 shows the expected number of new infections ( $\mu^I$ ) and new cases ( $\mu^N$ ) over time for each country. The estimated numbers are compared to the observed number of new cases in order to assess the model fit. Overall, our model provides a reasonable fit in the sense that the expected number of new cases follow the development of the observed number of new cases in each country. Furthermore, changes in the expected number of new infections clearly follow the implementation of NPIs. The size of the credible intervals reflect varying uncertainty in the expected number of new infections and cases in each country (e.g., compare Germany (small) to France (large)). For a couple of countries (e.g., Ireland, Sweden, United Kingdom, United States), the credible intervals are particularly large at the very end of the epidemic. This corresponds to a rather high level of new infections at that time, indicating that the interventions were not yet enough to strongly reduce the number of new infections. The large credible intervals are a reminder that this implies a risk for a new exponential increase in the number of new infections.

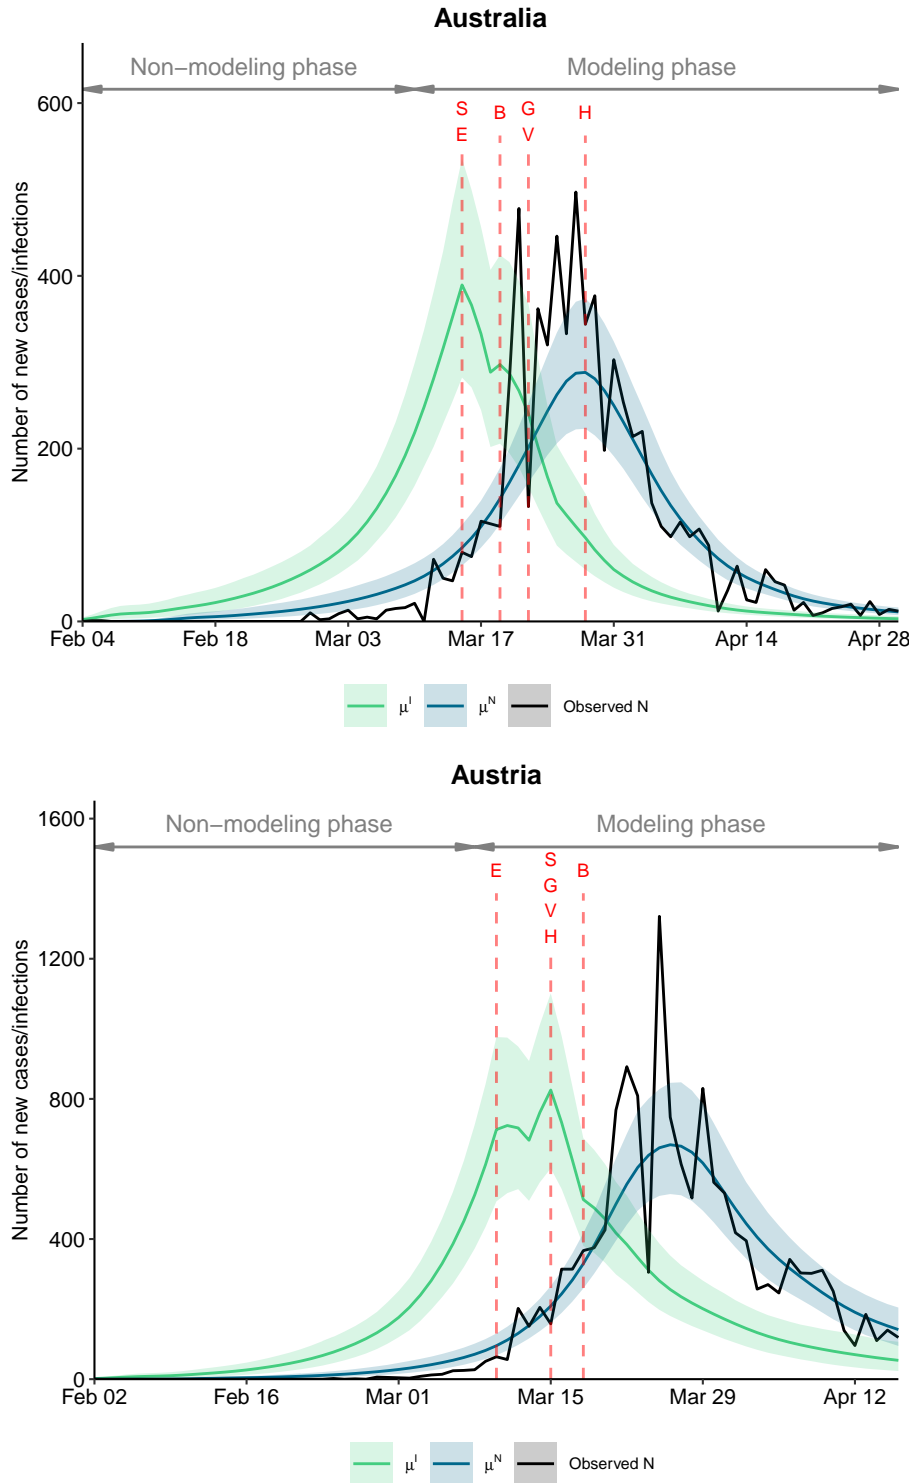

**Fig 18.** Expected number of new infections  $\mu^I$  and new cases  $\mu^N$  (posterior mean as colored lines with 95% credible interval as shaded area) and the observed number of new cases by country over time. Red letters and lines indicate the first day an NPI was implemented within a country (S: School closures, B: Border closure, E: Ban of large gatherings, G: Ban of small gatherings, V: Venue closure, H: Stay-at-home order, W: Work-from-home order).

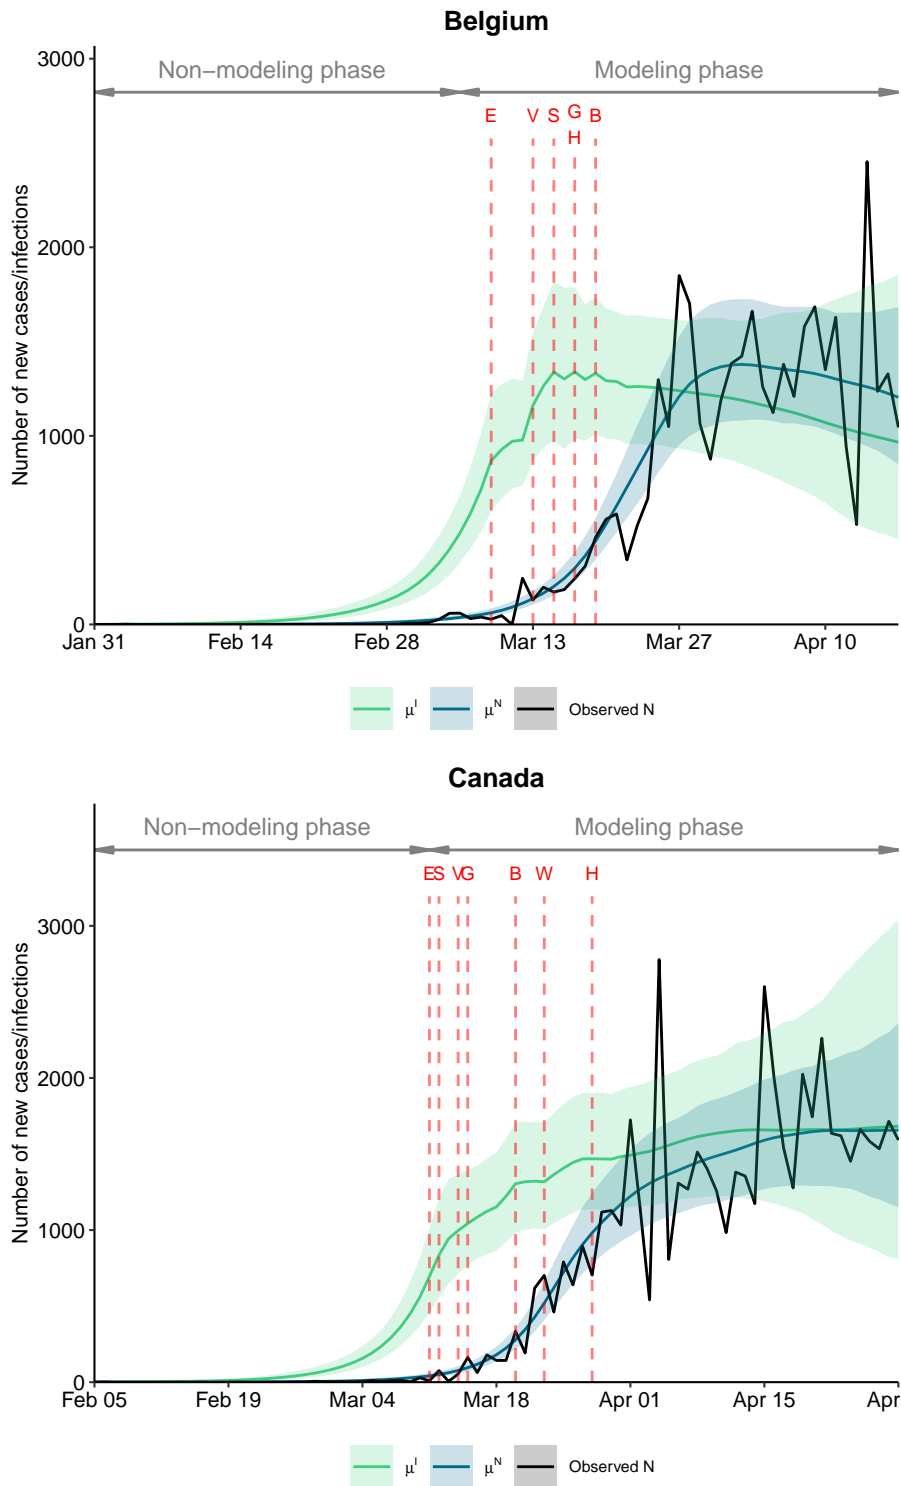

**Fig 18.** Expected number of new infections  $\mu^I$  and new cases  $\mu^N$  (posterior mean as colored lines with 95% credible interval as shaded area) and the observed number of new cases by country over time. Red letters and lines indicate the first day an NPI was implemented within a country (S: School closures, B: Border closure, E: Ban of large gatherings, G: Ban of small gatherings, V: Venue closure, H: Stay-at-home order, W: Work-from-home order).

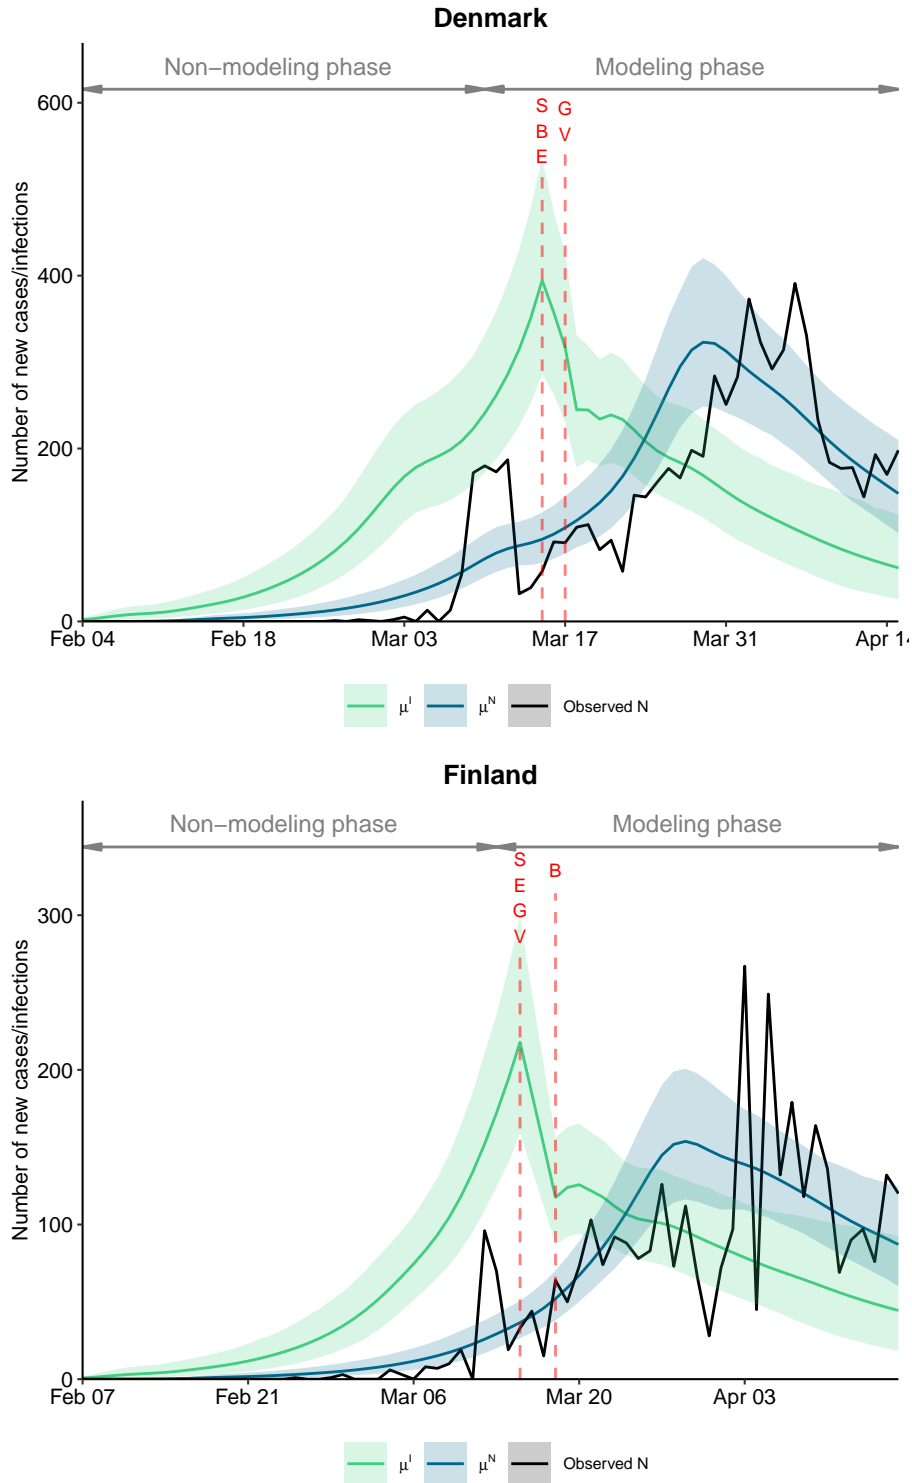

**Fig 18.** Expected number of new infections  $\mu^I$  and new cases  $\mu^N$  (posterior mean as colored lines with 95% credible interval as shaded area) and the observed number of new cases by country over time. Red letters and lines indicate the first day an NPI was implemented within a country (S: School closures, B: Border closure, E: Ban of large gatherings, G: Ban of small gatherings, V: Venue closure, H: Stay-at-home order, W: Work-from-home order).

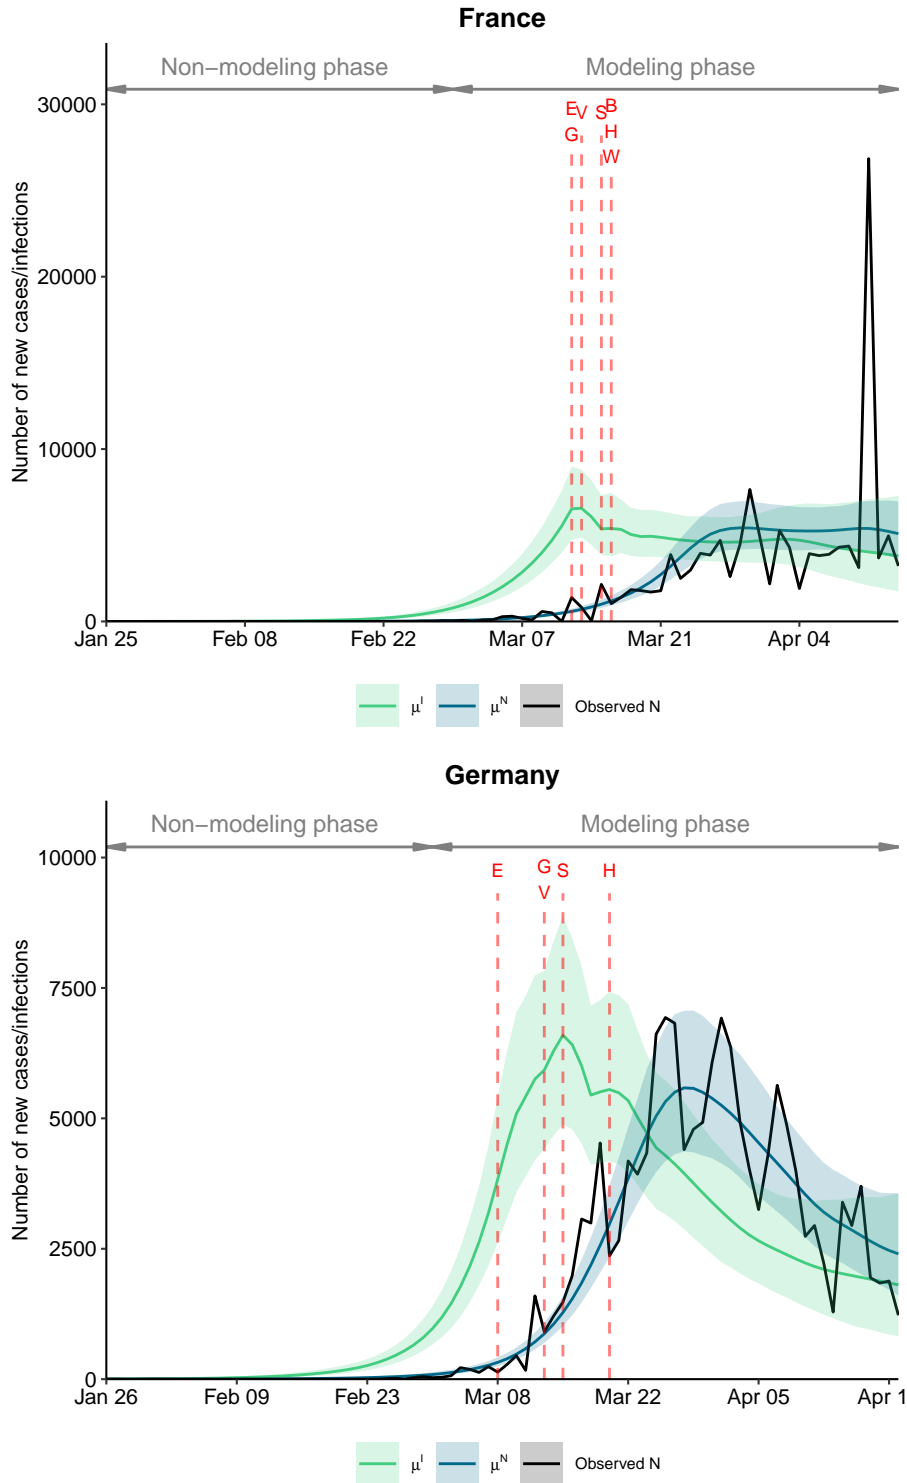

**Fig 18.** Expected number of new infections  $\mu^I$  and new cases  $\mu^N$  (posterior mean as colored lines with 95% credible interval as shaded area) and the observed number of new cases by country over time. Red letters and lines indicate the first day an NPI was implemented within a country (S: School closures, B: Border closure, E: Ban of large gatherings, G: Ban of small gatherings, V: Venue closure, H: Stay-at-home order, W: Work-from-home order).

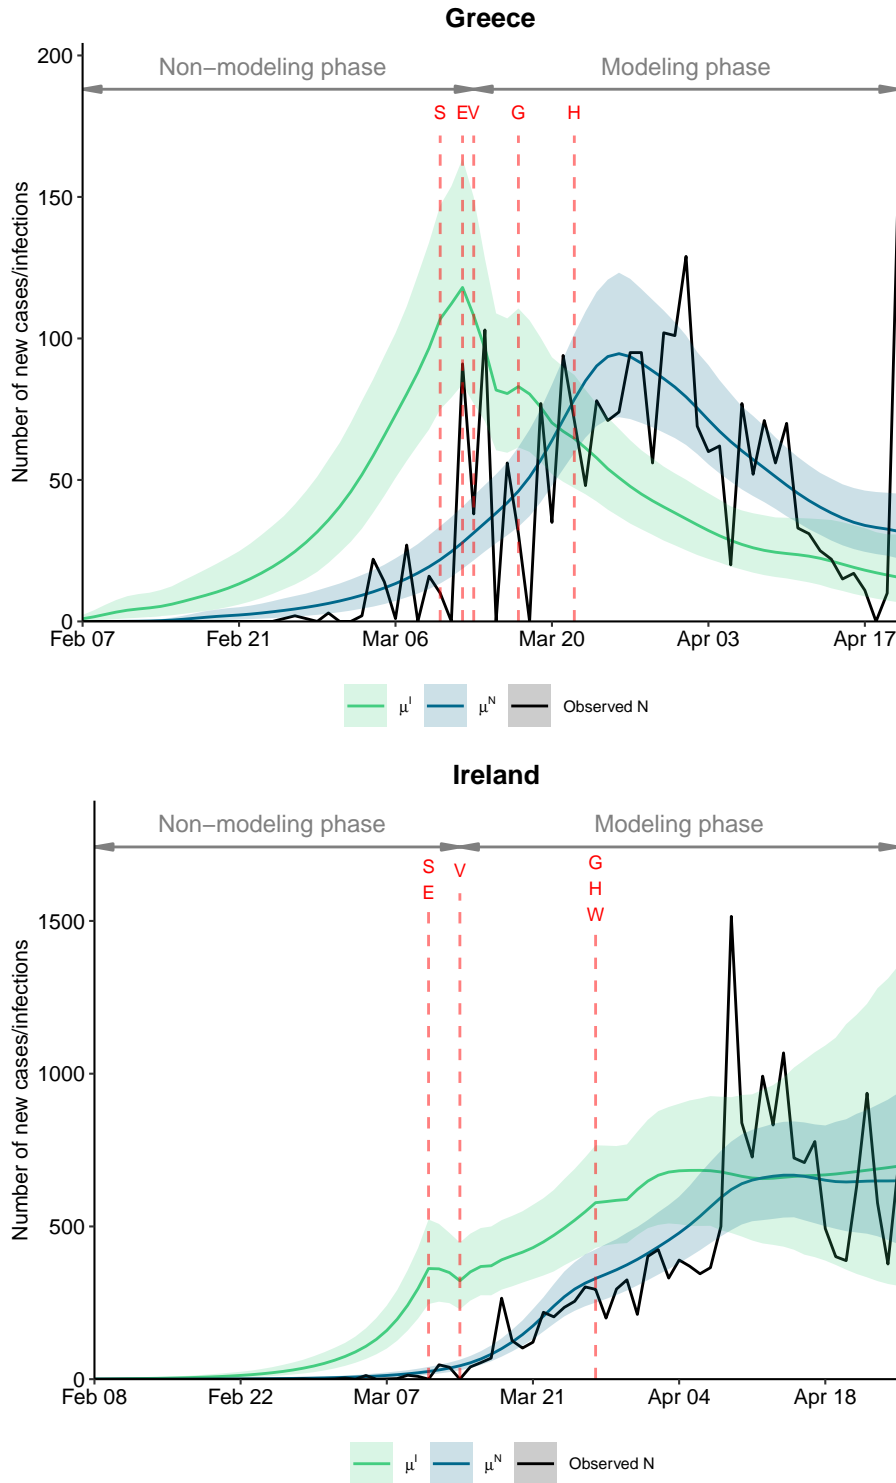

**Fig 18.** Expected number of new infections  $\mu^I$  and new cases  $\mu^N$  (posterior mean as colored lines with 95% credible interval as shaded area) and the observed number of new cases by country over time. Red letters and lines indicate the first day an NPI was implemented within a country (S: School closures, B: Border closure, E: Ban of large gatherings, G: Ban of small gatherings, V: Venue closure, H: Stay-at-home order, W: Work-from-home order).

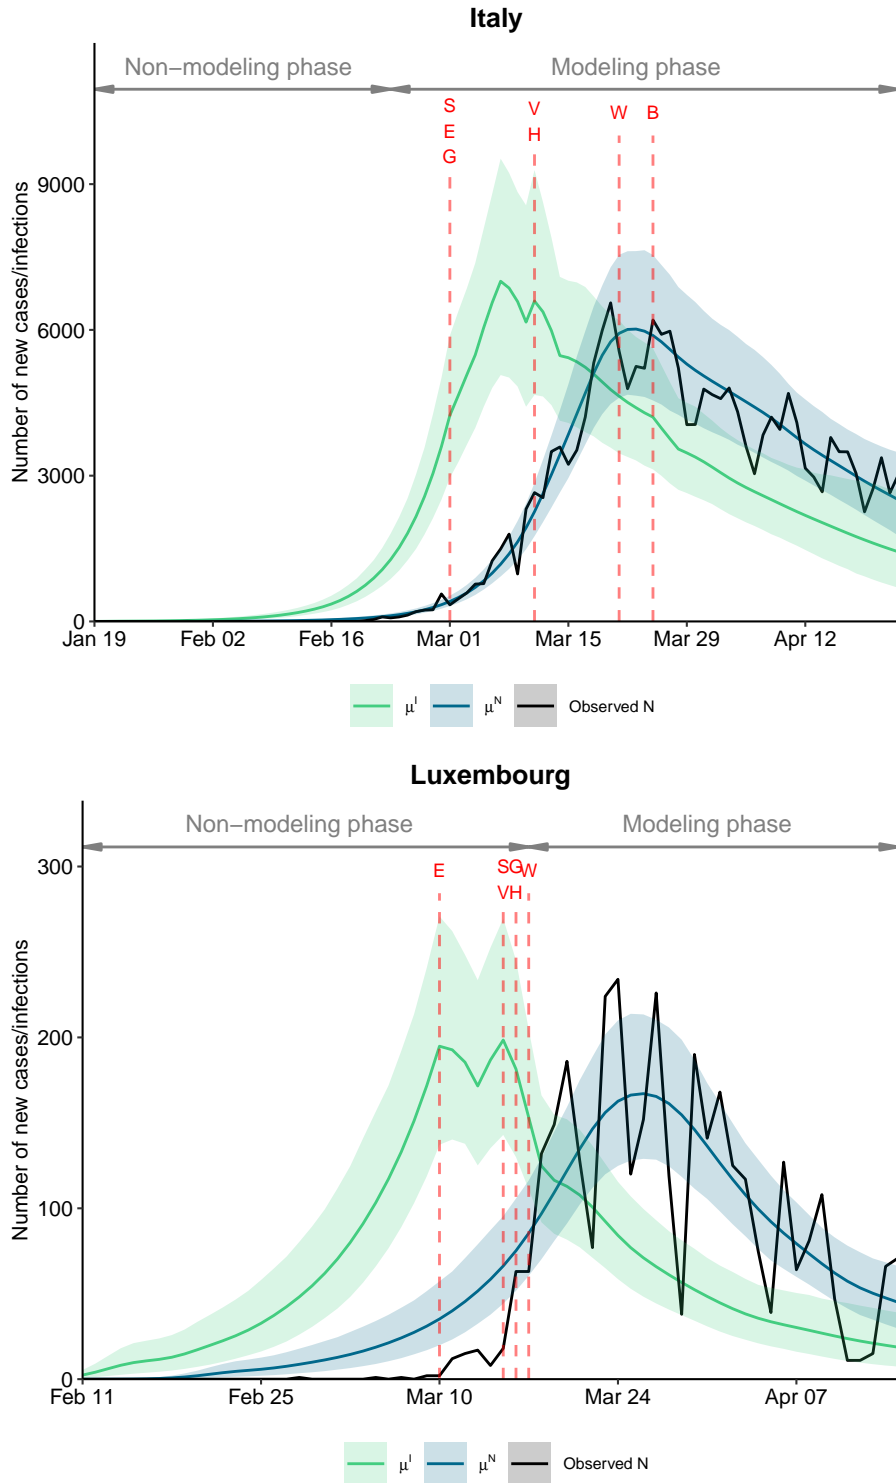

**Fig 18.** Expected number of new infections  $\mu^I$  and new cases  $\mu^N$  (posterior mean as colored lines with 95% credible interval as shaded area) and the observed number of new cases by country over time. Red letters and lines indicate the first day an NPI was implemented within a country (S: School closures, B: Border closure, E: Ban of large gatherings, G: Ban of small gatherings, V: Venue closure, H: Stay-at-home order, W: Work-from-home order).

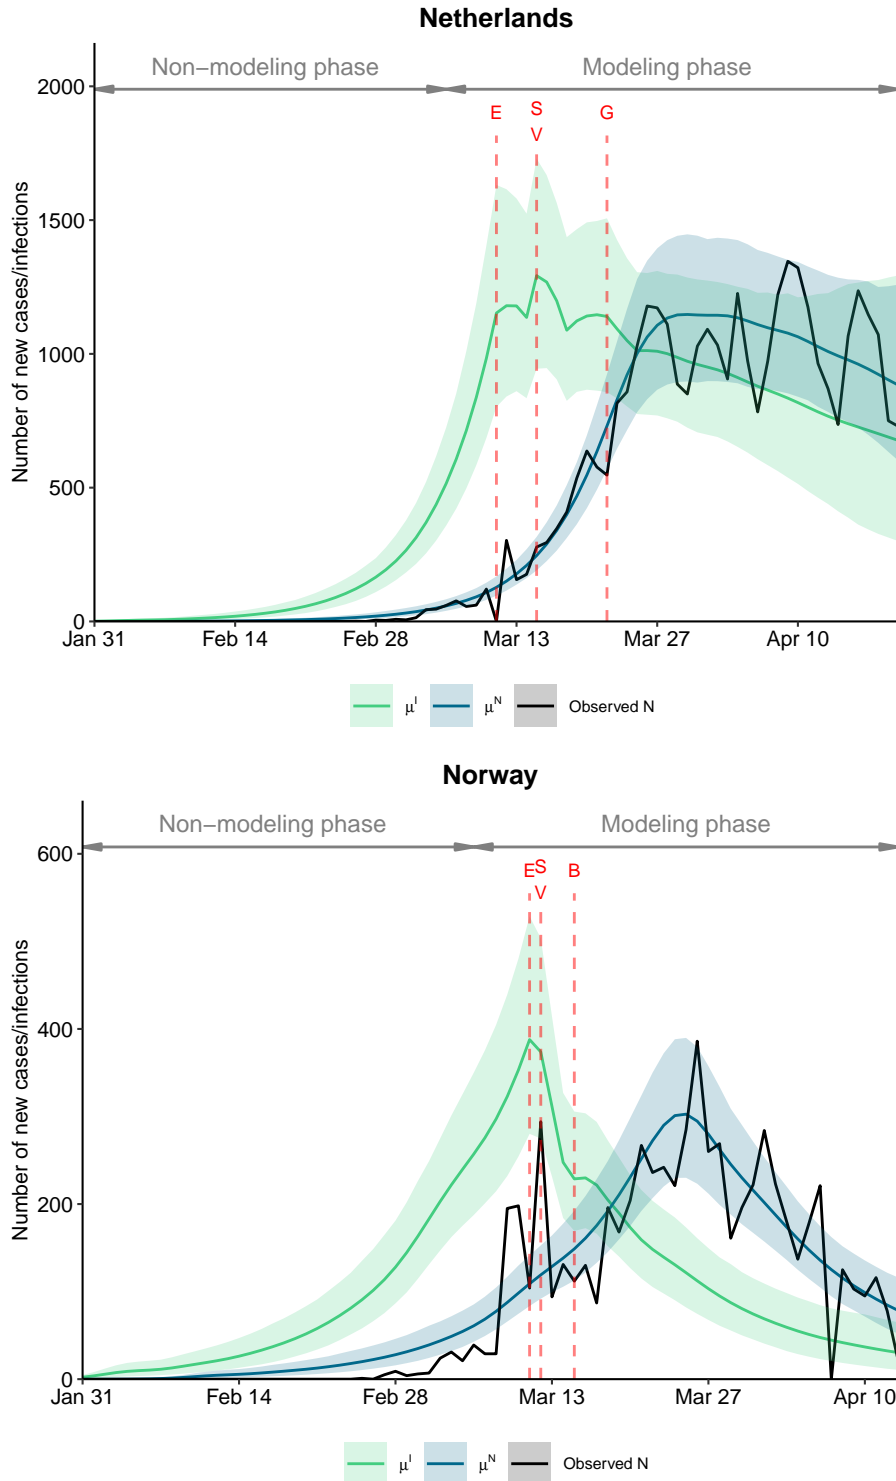

**Fig 18.** Expected number of new infections  $\mu^I$  and new cases  $\mu^N$  (posterior mean as colored lines with 95% credible interval as shaded area) and the observed number of new cases by country over time. Red letters and lines indicate the first day an NPI was implemented within a country (S: School closures, B: Border closure, E: Ban of large gatherings, G: Ban of small gatherings, V: Venue closure, H: Stay-at-home order, W: Work-from-home order).



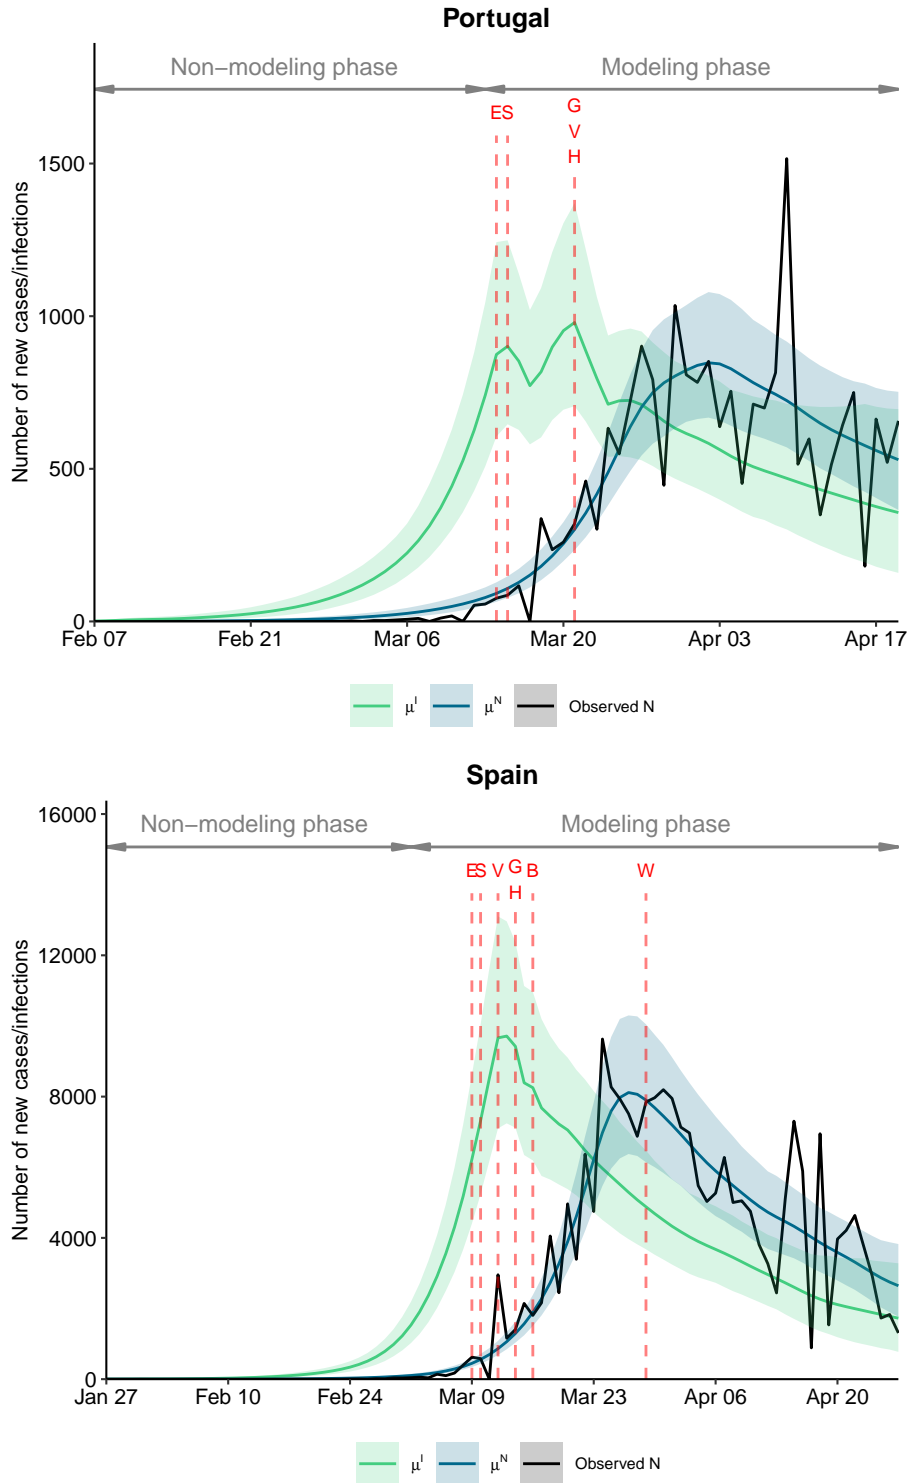

**Fig 18.** Expected number of new infections  $\mu^I$  and new cases  $\mu^N$  (posterior mean as colored lines with 95% credible interval as shaded area) and the observed number of new cases by country over time. Red letters and lines indicate the first day an NPI was implemented within a country (S: School closures, B: Border closure, E: Ban of large gatherings, G: Ban of small gatherings, V: Venue closure, H: Stay-at-home order, W: Work-from-home order).

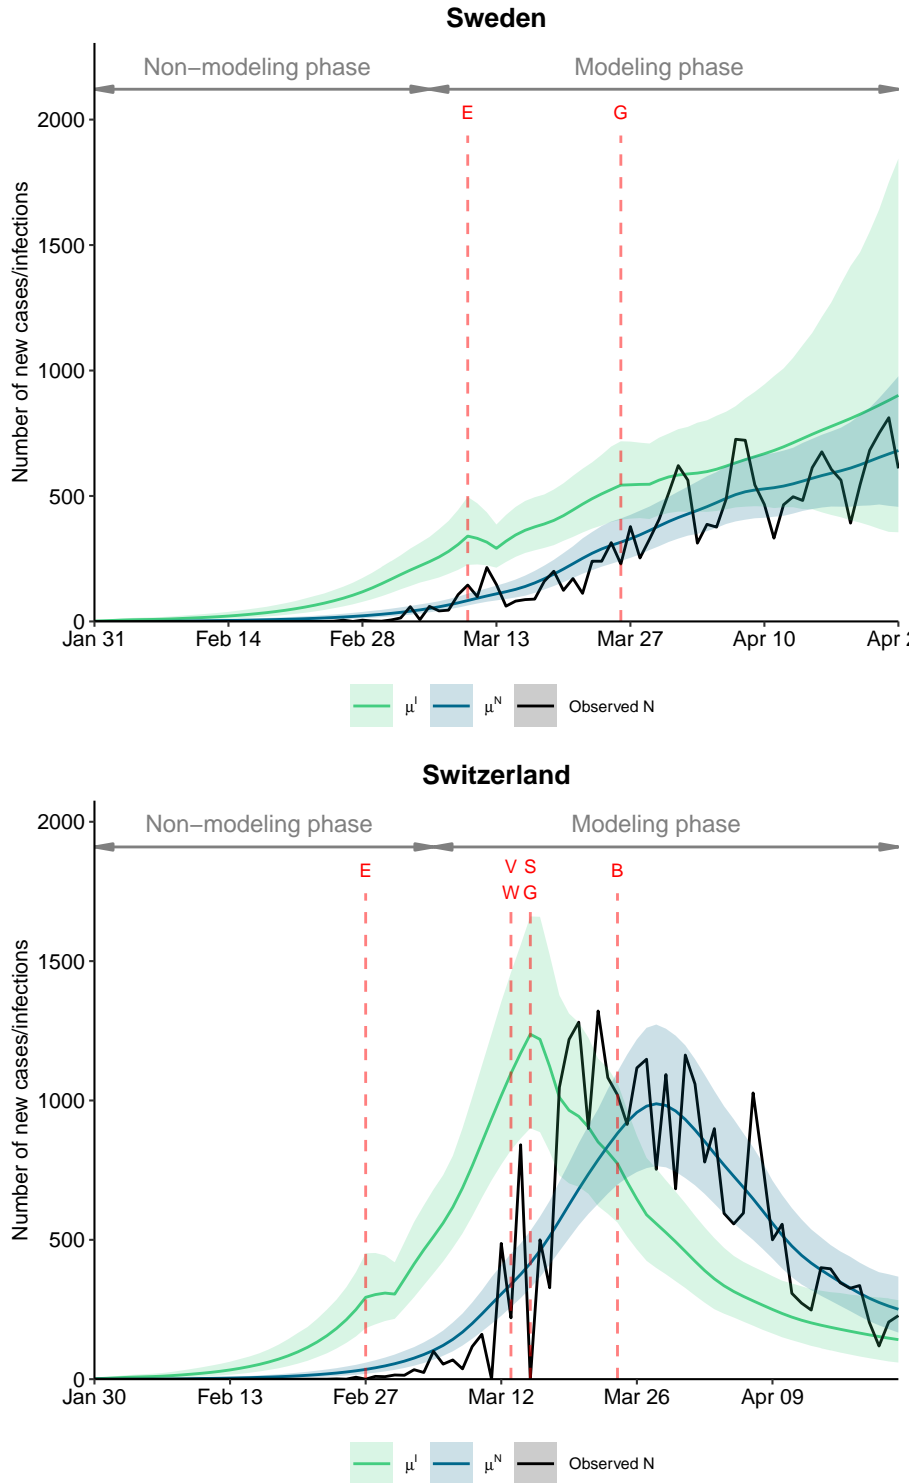

**Fig 18.** Expected number of new infections  $\mu^I$  and new cases  $\mu^N$  (posterior mean as colored lines with 95% credible interval as shaded area) and the observed number of new cases by country over time. Red letters and lines indicate the first day an NPI was implemented within a country (S: School closures, B: Border closure, E: Ban of large gatherings, G: Ban of small gatherings, V: Venue closure, H: Stay-at-home order, W: Work-from-home order).

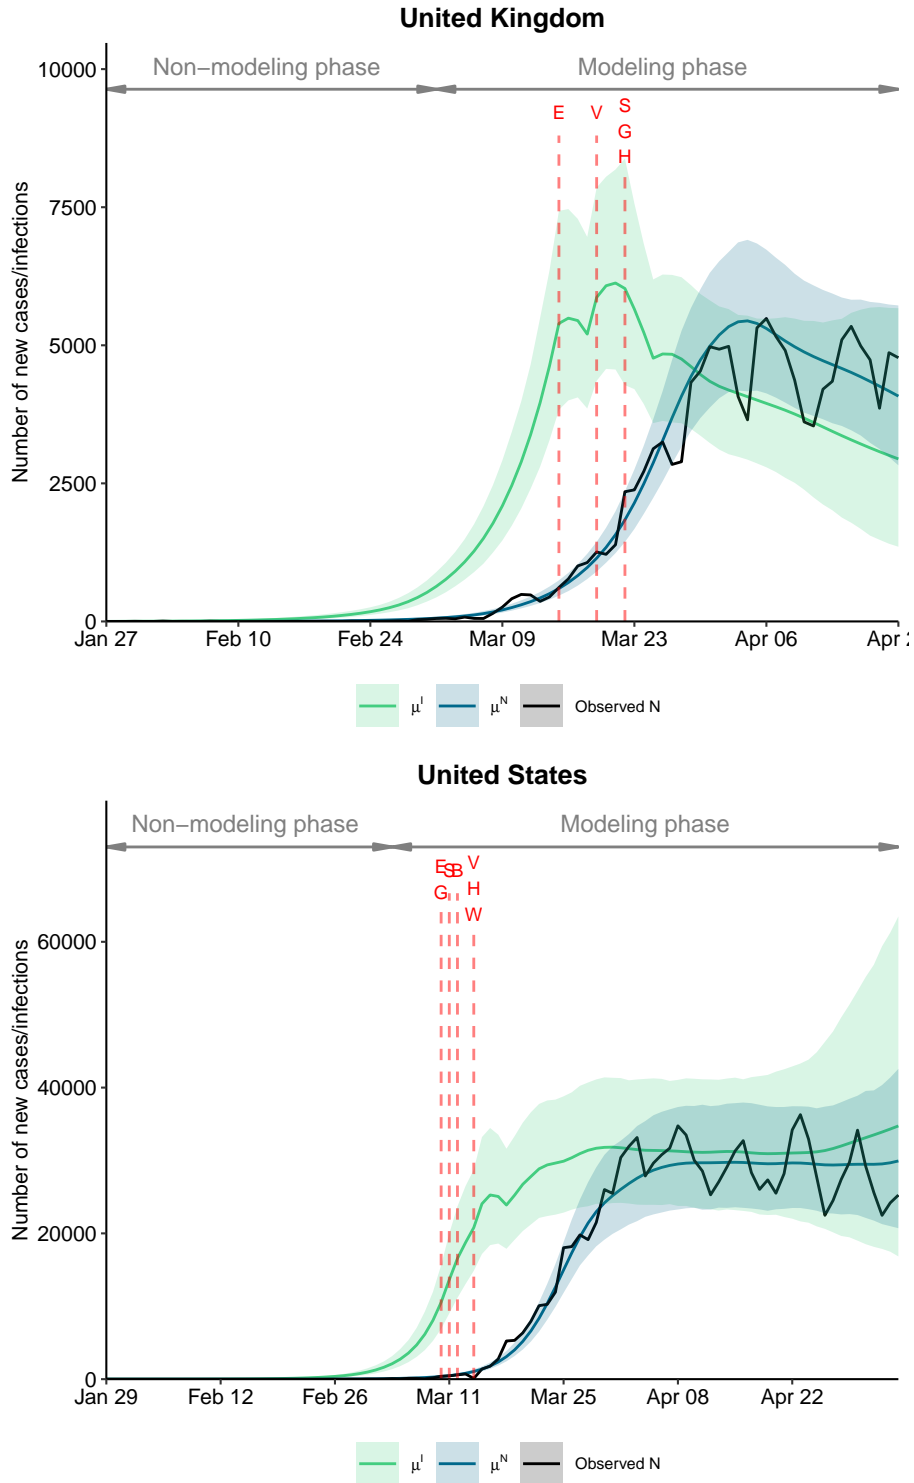

**Fig 18.** Expected number of new infections  $\mu^I$  and new cases  $\mu^N$  (posterior mean as colored lines with 95% credible interval as shaded area) and the observed number of new cases by country over time. Red letters and lines indicate the first day an NPI was implemented within a country (S: School closures, B: Border closure, E: Ban of large gatherings, G: Ban of small gatherings, V: Venue closure, H: Stay-at-home order, W: Work-from-home order).

## 8 Data on non-pharmaceutical interventions

### 8.1 Data collection

Data on non-pharmaceutical interventions (NPIs) have been collected systematically in six steps.

1. Granular information on NPIs have been gathered from government resources and news outlets by two authors (AC, PB).
2. After collecting data for the first few countries, NPIs have been classified into seven categories by seven authors (NB, EvW, AL, AS, DT, AC, PB): (1) school closures, (2) border closures, (3) bans of large gatherings, (4) bans of small gatherings, (5) venue closures (e.g., shops, bars, restaurants, and other recreational activities), (6) stay-at-home orders prohibiting public movements without valid reason, and (7) work-from-home orders. Note that stay-at-home orders always implied bans of gatherings and venue closures, and bans of large gatherings implied bans of small gatherings. That is, for instance, if a country implemented a ban of small gatherings without yet having implemented a ban of large gatherings, then the implementation date for the ban of small and the ban of large gatherings is the same. In contrast to this, a ban of small gatherings alone does not necessarily imply a venue closure (see, for example, Sweden where recreational facilities, bars, and restaurants were allowed to stay open, despite a ban of small gatherings). Similarly, a work-from-home order does not necessarily imply a venue closure, although this happened to be the case for all countries in our data during the first epidemic wave. Our classification has later been cross-checked against the encoding from the Imperial College COVID-19 Response Team<sup>9</sup> and “Coronavirus Government Response Tracker” from the University of Oxford<sup>22</sup>.
3. The date of NPIs has been referred to as the first day a measure went into action. For instance, if a country banned large gatherings with more than 5,000 people on March 1 and banned large gatherings with more than 1,000 people on March 5, then March 1 has been chosen as the date of bans of large gatherings.
4. NPIs for countries that subsequently followed in the data collection have been encoded accordingly.

- 478 5. The date of NPIs has been collected for each country or region.
- 479 6. A fifth author (BK) checked and verified the collected data. Part of this was also to recruit  
480 local residents and/or native speakers from each country in order to check our encoding. The  
481 reason for this is that countries have often used different legal terms to refer to the same NPI.  
482 Also, checking with local residents has helped to determine, for instance, whether the NPI was  
483 actually enforced or just recommended.

## 484 8.2 Data Sources

485 In Table 6, we provide sources of our data on NPIs at a national level. For less centrally managed  
486 countries, the aggregated (national level) date of the NPI is shown and the regional sources are  
487 displayed in Table 7 (United States), Table 8 (Germany), Table 9 (Spain), Table 10 (Canada),  
488 Table 11 (Australia), and Table 12 (Italy). Note that border closures are defined as a national  
489 closure of borders and is thus only considered at a national level.

490 In the following, we want to highlight some encoding decisions that were subject to internal  
491 discussions.

- 492 • School closure in New South Wales (Australia): Schools have remained technically open but  
493 attendance dropped below 5%. Therefore, schools have been encoded as closed.
- 494 • Border closure in the US: The US has not stopped flights to all countries but closed their  
495 land borders and has suspended travel from a huge number of Asian and European countries.  
496 Hence, US borders have been encoded as closed.
- 497 • Border closure in Germany: Germany has not closed its borders with Belgium and the  
498 Netherlands, therefore not all land borders have been closed and we have decided to encode  
499 them as open.
- 500 • School closure in Sweden: Only upper secondary schools (16+ y/o) and universities are closed,  
501 while other schools are still open. Thus, Swedish schools have been encoded as open.
- 502 • Venue closure in Belgium: In Belgium, bars and restaurants were ordered to close on April  
503 14\*, while other non-essential businesses followed only a few days later†. In Austria, shops

---

\*see <https://www.vrt.be/vrtnws/en/2020/03/14/tensions-as-belgium-closes-bars-and-restaurants/>

†see <https://www.reuters.com/article/health-coronavirus-belgium-lockdown-idUSS8N2K307D>

504 were ordered to close on March 15, while bars and restaurants were allowed to stay open until  
505 3pm<sup>‡</sup>. In both cases, the earlier dates (April 14 and March 15) were considered as the dates  
506 when venues were closed.

---

<sup>‡</sup>see <https://www.bundeskanzleramt.gv.at/bundeskanzleramt/nachrichten-der-bundesregierung/2020/bundesregierung-praesentiert-aktuelle-beschluesse-zum-coronavirus.html>

| Country   | NPI                     | Date effective | Source                                                                                                                                                                                                                                                                                                                                        |
|-----------|-------------------------|----------------|-----------------------------------------------------------------------------------------------------------------------------------------------------------------------------------------------------------------------------------------------------------------------------------------------------------------------------------------------|
| Australia | Ban of small gatherings |                | Date derived by cumulative share, see Tab. 11                                                                                                                                                                                                                                                                                                 |
|           | Border closure          | 2020-03-20     | <a href="https://www.pm.gov.au/media/border-restrictions">https://www.pm.gov.au/media/border-restrictions</a>                                                                                                                                                                                                                                 |
|           | Venue closure           |                | Date derived by cumulative share, see Tab. 11                                                                                                                                                                                                                                                                                                 |
| Austria   | Ban of large gatherings | 2020-03-11     | <a href="https://www.bundeskanzleramt.gv.at/bundeskanzleramt/nachrichten-der-bundesregierung/2020/weitere-massnahmen-gegen-ausbreitung-des-coronavirus.html">https://www.bundeskanzleramt.gv.at/bundeskanzleramt/nachrichten-der-bundesregierung/2020/weitere-massnahmen-gegen-ausbreitung-des-coronavirus.html</a>                           |
|           | Ban of small gatherings | 2020-03-16     | <a href="https://www.reuters.com/article/us-health-coronavirus-austria-austria-imposes-major-restrictions-on-movement-over-coronavirus-idUSKBN2120D8">https://www.reuters.com/article/us-health-coronavirus-austria-austria-imposes-major-restrictions-on-movement-over-coronavirus-idUSKBN2120D8</a>                                         |
|           | School closure          | 2020-03-16     | <a href="https://www.reuters.com/article/us-health-coronavirus-austria-austria-closing-schools-over-coronavirus-as-border-checks-take-effect-idUSKBN20Y2YC">https://www.reuters.com/article/us-health-coronavirus-austria-austria-closing-schools-over-coronavirus-as-border-checks-take-effect-idUSKBN20Y2YC</a>                             |
|           | Border closure          | 2020-03-19     | <a href="https://www.reuters.com/article/us-health-coronavirus-austria-coronavirus-infections-top-2000-in-austria-more-border-controls-imposed-idUSKBN2160WK">https://www.reuters.com/article/us-health-coronavirus-austria-coronavirus-infections-top-2000-in-austria-more-border-controls-imposed-idUSKBN2160WK</a>                         |
|           | Venue closure           | 2020-03-16     | <a href="https://www.bundeskanzleramt.gv.at/bundeskanzleramt/nachrichten-der-bundesregierung/2020/bundesregierung-praesentiert-aktuelle-beschluesse-zum-coronavirus.html">https://www.bundeskanzleramt.gv.at/bundeskanzleramt/nachrichten-der-bundesregierung/2020/bundesregierung-praesentiert-aktuelle-beschluesse-zum-coronavirus.html</a> |
|           | Lockdown                | 2020-03-16     | <a href="https://www.sozialministerium.at/Informationen-zum-Coronavirus/Coronavirus---Aktuelle-Ma%C3%9Fnahmen.html">https://www.sozialministerium.at/Informationen-zum-Coronavirus/Coronavirus---Aktuelle-Ma%C3%9Fnahmen.html</a>                                                                                                             |
| Belgium   | Ban of large gatherings | 2020-03-10     | <a href="https://www.info-coronavirus.be/en/news/protect-yourself-and-protect-the-others/">https://www.info-coronavirus.be/en/news/protect-yourself-and-protect-the-others/</a>                                                                                                                                                               |
|           | Ban of small gatherings | 2020-03-18     | <a href="https://de.reuters.com/article/health-coronavirus-belgium-lockdown-idUSB5N28S003">https://de.reuters.com/article/health-coronavirus-belgium-lockdown-idUSB5N28S003</a>                                                                                                                                                               |

|                         |            |                                                                                                                                                                                                                                                                                           |
|-------------------------|------------|-------------------------------------------------------------------------------------------------------------------------------------------------------------------------------------------------------------------------------------------------------------------------------------------|
| School closure          | 2020-03-16 | <a href="https://www.info-coronavirus.be/en/2020/03/12/phase-2-maintained-transition-to-the-federal-phase-and-additional-measures/">https://www.info-coronavirus.be/en/2020/03/12/phase-2-maintained-transition-to-the-federal-phase-and-additional-measures/</a>                         |
| Border closure          | 2020-03-20 | <a href="https://www.politico.eu/article/belgium-closes-borders-for-non-essential-travel/">https://www.politico.eu/article/belgium-closes-borders-for-non-essential-travel/</a>                                                                                                           |
| Venue closure           | 2020-03-14 | <a href="https://www.info-coronavirus.be/en/2020/03/12/phase-2-maintained-transition-to-the-federal-phase-and-additional-measures/">https://www.info-coronavirus.be/en/2020/03/12/phase-2-maintained-transition-to-the-federal-phase-and-additional-measures/</a>                         |
| Lockdown                | 2020-03-18 | <a href="https://de.reuters.com/article/health-coronavirus-belgium-lockdown-idUSB5N28S003">https://de.reuters.com/article/health-coronavirus-belgium-lockdown-idUSB5N28S003</a>                                                                                                           |
| Ban of large gatherings |            | Date derived by cumulative share, see Tab. 10                                                                                                                                                                                                                                             |
| Ban of small gatherings |            | Date derived by cumulative share, see Tab. 10                                                                                                                                                                                                                                             |
| School closure          |            | Date derived by cumulative share, see Tab. 10                                                                                                                                                                                                                                             |
| Border closure          | 2020-03-21 | <a href="https://www.canada.ca/en/public-health/services/diseases/2019-novel-coronavirus-infection/canadas-reponse.html?topic=tilelink">https://www.canada.ca/en/public-health/services/diseases/2019-novel-coronavirus-infection/canadas-reponse.html?topic=tilelink</a>                 |
| Venue closure           |            | Date derived by cumulative share, see Tab. 10                                                                                                                                                                                                                                             |
| Ban of large gatherings | 2020-03-16 | <a href="https://www.regeringen.dk/nyheder/pressemoeede-11-marts-i-spejlsalen/">https://www.regeringen.dk/nyheder/pressemoeede-11-marts-i-spejlsalen/</a>                                                                                                                                 |
| Ban of small gatherings | 2020-03-18 | <a href="https://www.reuters.com/article/us-health-coronavirus-denmark/denmark-bans-crowds-of-over-10-people-to-curb-coronavirus-idUSKBN2143KG">https://www.reuters.com/article/us-health-coronavirus-denmark/denmark-bans-crowds-of-over-10-people-to-curb-coronavirus-idUSKBN2143KG</a> |
| School closure          | 2020-03-16 | <a href="https://www.regeringen.dk/nyheder/pressemoeede-11-marts-i-spejlsalen/">https://www.regeringen.dk/nyheder/pressemoeede-11-marts-i-spejlsalen/</a>                                                                                                                                 |
| Border closure          | 2020-03-16 | <a href="https://www.oresunddirekt.dk/en/news/danish-borders-closed-due-to-coronavirus-covid-19">https://www.oresunddirekt.dk/en/news/danish-borders-closed-due-to-coronavirus-covid-19</a>                                                                                               |
| Venue closure           | 2020-03-18 | <a href="https://www.reuters.com/article/us-health-coronavirus-denmark/denmark-bans-crowds-of-over-10-people-to-curb-coronavirus-idUSKBN2143KG">https://www.reuters.com/article/us-health-coronavirus-denmark/denmark-bans-crowds-of-over-10-people-to-curb-coronavirus-idUSKBN2143KG</a> |



|                         |                         |                                                                                                                                                                                                                                         |                                                                                                                                                                                                                                                                                                                                                                       |
|-------------------------|-------------------------|-----------------------------------------------------------------------------------------------------------------------------------------------------------------------------------------------------------------------------------------|-----------------------------------------------------------------------------------------------------------------------------------------------------------------------------------------------------------------------------------------------------------------------------------------------------------------------------------------------------------------------|
| Finland                 | Ban of large gatherings | 2020-03-16                                                                                                                                                                                                                              | <a href="https://valtioneuvosto.fi/en/article/-/asset_publisher/10616/hallitus-totesi-suomen-olevan-poikkeusoloissa-koronavirustilanteen-vuoksi">https://valtioneuvosto.fi/en/article/-/asset_publisher/10616/hallitus-totesi-suomen-olevan-poikkeusoloissa-koronavirustilanteen-vuoksi</a>                                                                           |
|                         | Ban of small gatherings | 2020-03-16                                                                                                                                                                                                                              | <a href="https://valtioneuvosto.fi/en/article/-/asset_publisher/10616/hallitus-totesi-suomen-olevan-poikkeusoloissa-koronavirustilanteen-vuoksi">https://valtioneuvosto.fi/en/article/-/asset_publisher/10616/hallitus-totesi-suomen-olevan-poikkeusoloissa-koronavirustilanteen-vuoksi</a>                                                                           |
|                         | School closure          | 2020-03-16                                                                                                                                                                                                                              | <a href="https://valtioneuvosto.fi/en/article/-/asset_publisher/10616/hallitus-totesi-suomen-olevan-poikkeusoloissa-koronavirustilanteen-vuoksi">https://valtioneuvosto.fi/en/article/-/asset_publisher/10616/hallitus-totesi-suomen-olevan-poikkeusoloissa-koronavirustilanteen-vuoksi</a>                                                                           |
|                         | Border closure          | 2020-03-19                                                                                                                                                                                                                              | <a href="https://valtioneuvosto.fi/en/article/-/asset_publisher/1410869/suomen-rajaliikennetta-aletaan-rajoittaa-elakkeella-olevia-rajavartijoita-ja-poliiseja-voidaan-kutsua-toihin">https://valtioneuvosto.fi/en/article/-/asset_publisher/1410869/suomen-rajaliikennetta-aletaan-rajoittaa-elakkeella-olevia-rajavartijoita-ja-poliiseja-voidaan-kutsua-toihin</a> |
|                         | Venue closure           | 2020-03-16                                                                                                                                                                                                                              | <a href="https://valtioneuvosto.fi/en/article/-/asset_publisher/10616/hallitus-totesi-suomen-olevan-poikkeusoloissa-koronavirustilanteen-vuoksi">https://valtioneuvosto.fi/en/article/-/asset_publisher/10616/hallitus-totesi-suomen-olevan-poikkeusoloissa-koronavirustilanteen-vuoksi</a>                                                                           |
|                         | Ban of large gatherings | 2020-03-13                                                                                                                                                                                                                              | <a href="https://www.bbc.com/news/world-europe-51892477">https://www.bbc.com/news/world-europe-51892477</a>                                                                                                                                                                                                                                                           |
|                         | Ban of small gatherings | 2020-03-13                                                                                                                                                                                                                              | <a href="https://www.bbc.com/news/world-europe-51892477">https://www.bbc.com/news/world-europe-51892477</a>                                                                                                                                                                                                                                                           |
|                         | School closure          | 2020-03-16                                                                                                                                                                                                                              | <a href="https://www.bbc.com/news/world-europe-51892477">https://www.bbc.com/news/world-europe-51892477</a>                                                                                                                                                                                                                                                           |
|                         | Border closure          | 2020-03-17                                                                                                                                                                                                                              | <a href="https://www.gouvernement.fr/info-coronavirus">https://www.gouvernement.fr/info-coronavirus</a>                                                                                                                                                                                                                                                               |
| Venue closure           | 2020-03-14              | <a href="https://www.gouvernement.fr/partage/11444-declaration-de-m-edouard-philippe-premier-ministre-sur-le-covid-19">https://www.gouvernement.fr/partage/11444-declaration-de-m-edouard-philippe-premier-ministre-sur-le-covid-19</a> |                                                                                                                                                                                                                                                                                                                                                                       |
| Lockdown                | 2020-03-17              | <a href="https://www.gouvernement.fr/info-coronavirus">https://www.gouvernement.fr/info-coronavirus</a>                                                                                                                                 |                                                                                                                                                                                                                                                                                                                                                                       |
| Work-from-home order    | 2020-03-17              | <a href="https://www.gouvernement.fr/info-coronavirus">https://www.gouvernement.fr/info-coronavirus</a>                                                                                                                                 |                                                                                                                                                                                                                                                                                                                                                                       |
| Ban of large gatherings |                         |                                                                                                                                                                                                                                         | Date derived by cumulative share, see Tab. 8                                                                                                                                                                                                                                                                                                                          |
| Germany                 |                         |                                                                                                                                                                                                                                         |                                                                                                                                                                                                                                                                                                                                                                       |

|                         |            |  |                                                                                                                                                                                                                                                                                                                   |
|-------------------------|------------|--|-------------------------------------------------------------------------------------------------------------------------------------------------------------------------------------------------------------------------------------------------------------------------------------------------------------------|
| Ban of small gatherings |            |  | Date derived by cumulative share, see Tab. 8                                                                                                                                                                                                                                                                      |
| School closure          |            |  | Date derived by cumulative share, see Tab. 8                                                                                                                                                                                                                                                                      |
| Venue closure           |            |  | Date derived by cumulative share, see Tab. 8                                                                                                                                                                                                                                                                      |
| Ban of large gatherings | 2020-03-13 |  | <a href="https://www.reuters.com/article/us-health-coronavirus-greece-measures/greece-to-shut-shops-quarantine-all-arrivals-from-abroad-idUSKBN2131SF">https://www.reuters.com/article/us-health-coronavirus-greece-measures/greece-to-shut-shops-quarantine-all-arrivals-from-abroad-idUSKBN2131SF</a>           |
| Ban of small gatherings | 2020-03-18 |  | <a href="https://www.reuters.com/article/us-health-coronavirus-greece-curfew/greece-imposes-lockdown-after-coronavirus-infections-jump-idUSKBN2190Z1">https://www.reuters.com/article/us-health-coronavirus-greece-curfew/greece-imposes-lockdown-after-coronavirus-infections-jump-idUSKBN2190Z1</a>             |
| School closure          | 2020-03-11 |  | <a href="https://www.reuters.com/article/us-health-coronavirus-greece-education/greece-shuts-schools-universities-to-halt-coronavirus-spread-idUSKBN20X28V">https://www.reuters.com/article/us-health-coronavirus-greece-education/greece-shuts-schools-universities-to-halt-coronavirus-spread-idUSKBN20X28V</a> |
| Venue closure           | 2020-03-14 |  | <a href="https://www.cnn.gr/news/ellada/story/211153/koronoios-poia-katastimata-kleinoy-n-poia-menoy-n-anoikta-lista">https://www.cnn.gr/news/ellada/story/211153/koronoios-poia-katastimata-kleinoy-n-poia-menoy-n-anoikta-lista</a>                                                                             |
| Lockdown                | 2020-03-23 |  | <a href="https://www.reuters.com/article/us-health-coronavirus-greece-curfew/greece-imposes-lockdown-after-coronavirus-infections-jump-idUSKBN2190Z1">https://www.reuters.com/article/us-health-coronavirus-greece-curfew/greece-imposes-lockdown-after-coronavirus-infections-jump-idUSKBN2190Z1</a>             |
| Ban of large gatherings | 2020-03-12 |  | <a href="https://www.gov.ie/en/press-release/96eb4c-statement-from-the-national-public-health-emergency-team/">https://www.gov.ie/en/press-release/96eb4c-statement-from-the-national-public-health-emergency-team/</a>                                                                                           |
| Ban of small gatherings | 2020-03-28 |  | <a href="https://www.gov.ie/en/publication/539d23-stay-at-home-the-latest-public-health-measures-to-prevent-the-spread/">https://www.gov.ie/en/publication/539d23-stay-at-home-the-latest-public-health-measures-to-prevent-the-spread/</a>                                                                       |
| School closure          | 2020-03-12 |  | <a href="https://www.gov.ie/en/press-release/96eb4c-statement-from-the-national-public-health-emergency-team/">https://www.gov.ie/en/press-release/96eb4c-statement-from-the-national-public-health-emergency-team/</a>                                                                                           |
| Venue closure           | 2020-03-15 |  | <a href="https://www.gov.ie/en/press-release/20fc58-all-pubs-advised-to-close-until-march-29/">https://www.gov.ie/en/press-release/20fc58-all-pubs-advised-to-close-until-march-29/</a>                                                                                                                           |
| Lockdown                | 2020-03-28 |  | <a href="https://www.gov.ie/en/publication/539d23-stay-at-home-the-latest-public-health-measures-to-prevent-the-spread/">https://www.gov.ie/en/publication/539d23-stay-at-home-the-latest-public-health-measures-to-prevent-the-spread/</a>                                                                       |

|                         |            |                                                                                                                                                                                                                                                                                                                                                                                                         |
|-------------------------|------------|---------------------------------------------------------------------------------------------------------------------------------------------------------------------------------------------------------------------------------------------------------------------------------------------------------------------------------------------------------------------------------------------------------|
| Work-from-home order    | 2020-03-28 | <a href="https://www.gov.ie/en/publication/539d23-stay-at-home-the-latest-public-health-measures-to-prevent-the-spread/">https://www.gov.ie/en/publication/539d23-stay-at-home-the-latest-public-health-measures-to-prevent-the-spread/</a>                                                                                                                                                             |
| Ban of large gatherings |            | Date derived by cumulative share, see Tab. 12                                                                                                                                                                                                                                                                                                                                                           |
| Ban of small gatherings |            | Date derived by cumulative share, see Tab. 12                                                                                                                                                                                                                                                                                                                                                           |
| School closure          |            | Date derived by cumulative share, see Tab. 12                                                                                                                                                                                                                                                                                                                                                           |
| Border closure          | 2020-03-26 | <a href="https://www.gazzettaufficiale.it/showNewsDetail?id=2553&amp;backTo=archivio&amp;anno=2020&amp;provenienza=archivio">https://www.gazzettaufficiale.it/showNewsDetail?id=2553&amp;backTo=archivio&amp;anno=2020&amp;provenienza=archivio</a>                                                                                                                                                     |
| Venue closure           |            | Date derived by cumulative share, see Tab. 12                                                                                                                                                                                                                                                                                                                                                           |
| Lockdown                |            | Date derived by cumulative share, see Tab. 12                                                                                                                                                                                                                                                                                                                                                           |
| Work-from-home order    |            | Date derived by cumulative share, see Tab. 12                                                                                                                                                                                                                                                                                                                                                           |
| <hr/>                   |            |                                                                                                                                                                                                                                                                                                                                                                                                         |
| Ban of large gatherings | 2020-03-11 | <a href="https://gouvernement.lu/fr/actualites/toutes_actualites/communiqués/2020/03-mars/11-conseil-gouvernement.html">https://gouvernement.lu/fr/actualites/toutes_actualites/communiqués/2020/03-mars/11-conseil-gouvernement.html</a>                                                                                                                                                               |
| Ban of small gatherings | 2020-03-17 | <a href="https://coronavirus.gouvernement.lu/en/communications-officielles.gouvernement%2Ben%2Bactualites%2Btoutes_actualites%2Bcommuniqués%2B2020%2B03-mars%2B17-declaration-premier-chd.html">https://coronavirus.gouvernement.lu/en/communications-officielles.gouvernement%2Ben%2Bactualites%2Btoutes_actualites%2Bcommuniqués%2B2020%2B03-mars%2B17-declaration-premier-chd.html</a>               |
| School closure          | 2020-03-16 | <a href="https://coronavirus.gouvernement.lu/en/communications-officielles.gouvernement%2Ben%2Bactualites%2Btoutes_actualites%2Bcommuniqués%2B2020%2B03-mars%2B12-cdg-extraordinaire-coronavirus.html">https://coronavirus.gouvernement.lu/en/communications-officielles.gouvernement%2Ben%2Bactualites%2Btoutes_actualites%2Bcommuniqués%2B2020%2B03-mars%2B12-cdg-extraordinaire-coronavirus.html</a> |
| Venue closure           | 2020-03-16 | <a href="https://coronavirus.gouvernement.lu/en/communications-officielles.gouvernement%2Ben%2Bactualites%2Btoutes_actualites%2Bcommuniqués%2B2020%2B03-mars%2B15-nouvelles-mesures-coronavirus.html">https://coronavirus.gouvernement.lu/en/communications-officielles.gouvernement%2Ben%2Bactualites%2Btoutes_actualites%2Bcommuniqués%2B2020%2B03-mars%2B15-nouvelles-mesures-coronavirus.html</a>   |

|                         |            |                                                                                                                                                                                                                                                                                                                                                                                       |
|-------------------------|------------|---------------------------------------------------------------------------------------------------------------------------------------------------------------------------------------------------------------------------------------------------------------------------------------------------------------------------------------------------------------------------------------|
| Lockdown                | 2020-03-17 | <a href="https://coronavirus.gouvernement.lu/en/communications-officielles.gouvernement%2Ben%2Bactualites%2Btoutes_actuelles%2Bcommunique%2B2020%2B03-mars%2B17-declaration-premier-chd.html">https://coronavirus.gouvernement.lu/en/communications-officielles.gouvernement%2Ben%2Bactualites%2Btoutes_actuelles%2Bcommunique%2B2020%2B03-mars%2B17-declaration-premier-chd.html</a> |
| Work-from-home orders   | 2020-03-18 | <a href="http://www.legilux.lu/eli/etat/leg/rgd/2020/03/18/a165/jo">http://www.legilux.lu/eli/etat/leg/rgd/2020/03/18/a165/jo</a>                                                                                                                                                                                                                                                     |
| <hr/>                   |            |                                                                                                                                                                                                                                                                                                                                                                                       |
| Ban of large gatherings | 2020-03-12 | <a href="https://www.government.nl/latest/news/2020/03/12/new-measures-to-stop-spread-of-coronavirus-in-the-netherlands">https://www.government.nl/latest/news/2020/03/12/new-measures-to-stop-spread-of-coronavirus-in-the-netherlands</a>                                                                                                                                           |
| Ban of small gatherings | 2020-03-23 | <a href="https://www.rijksoverheid.nl/actueel/nieuws/2020/03/24/aanvullende-maatregelen-23-maart">https://www.rijksoverheid.nl/actueel/nieuws/2020/03/24/aanvullende-maatregelen-23-maart</a>                                                                                                                                                                                         |
| School closure          | 2020-03-16 | <a href="https://www.government.nl/latest/news/2020/03/15/additional-measures-in-schools-the-hospitality-sector-and-sport">https://www.government.nl/latest/news/2020/03/15/additional-measures-in-schools-the-hospitality-sector-and-sport</a>                                                                                                                                       |
| Venue closure           | 2020-03-16 | <a href="https://www.government.nl/latest/news/2020/03/15/additional-measures-in-schools-the-hospitality-sector-and-sport">https://www.government.nl/latest/news/2020/03/15/additional-measures-in-schools-the-hospitality-sector-and-sport</a>                                                                                                                                       |
| <hr/>                   |            |                                                                                                                                                                                                                                                                                                                                                                                       |
| Ban of large gatherings | 2020-03-12 | <a href="https://www.fhi.no/nettpub/coronavirus/rad-og-informasjon-til-andresektorer-og-yrkesgrupper/anbefalinger-ved--store-arrangementer-knyttet-til-koronasmitte-i-norge/">https://www.fhi.no/nettpub/coronavirus/rad-og-informasjon-til-andresektorer-og-yrkesgrupper/anbefalinger-ved--store-arrangementer-knyttet-til-koronasmitte-i-norge/</a>                                 |
| School closure          | 2020-03-13 | <a href="https://www.regjeringen.no/en/aktuelt/coronavirus-measures-to-continue/id2694682/">https://www.regjeringen.no/en/aktuelt/coronavirus-measures-to-continue/id2694682/</a>                                                                                                                                                                                                     |
| Border closure          | 2020-03-16 | <a href="https://www.regjeringen.no/no/aktuelt/innforer-strengere-grensekontroll/id2693624/">https://www.regjeringen.no/no/aktuelt/innforer-strengere-grensekontroll/id2693624/</a>                                                                                                                                                                                                   |
| Venue closure           | 2020-03-13 | <a href="https://www.regjeringen.no/en/aktuelt/coronavirus-measures-to-continue/id2694682/">https://www.regjeringen.no/en/aktuelt/coronavirus-measures-to-continue/id2694682/</a>                                                                                                                                                                                                     |
| <hr/>                   |            |                                                                                                                                                                                                                                                                                                                                                                                       |
| Ban of large gatherings | 2020-03-15 | <a href="https://dre.pt/web/guest/home/-/dre/130277342/details/maximized">https://dre.pt/web/guest/home/-/dre/130277342/details/maximized</a>                                                                                                                                                                                                                                         |

Portugal

|                         |            |                                                                                                                                                                                                                                                                                                                                                                                                     |
|-------------------------|------------|-----------------------------------------------------------------------------------------------------------------------------------------------------------------------------------------------------------------------------------------------------------------------------------------------------------------------------------------------------------------------------------------------------|
| Ban of small gatherings | 2020-03-22 | <a href="https://dre.pt/web/guest/legislacao-consolidada/-/lc/130473378/202004042116/73800717/diploma/indice">https://dre.pt/web/guest/legislacao-consolidada/-/lc/130473378/202004042116/73800717/diploma/indice</a>                                                                                                                                                                               |
| School closure          | 2020-03-16 | <a href="https://www.portugal.gov.pt/pt/gc22/comunicacao/comunicado?i=suspensao-de-todas-as-atividades-letivas-e-nao-letivas-com-presenca-de-estudantes-em-todas-as-instituicoes-de-ensino-superior">https://www.portugal.gov.pt/pt/gc22/comunicacao/comunicado?i=suspensao-de-todas-as-atividades-letivas-e-nao-letivas-com-presenca-de-estudantes-em-todas-as-instituicoes-de-ensino-superior</a> |
| Venue closure           | 2020-03-22 | <a href="https://dre.pt/web/guest/legislacao-consolidada/-/lc/130473378/202004042116/73800717/diploma/indice">https://dre.pt/web/guest/legislacao-consolidada/-/lc/130473378/202004042116/73800717/diploma/indice</a>                                                                                                                                                                               |
| Lockdown                | 2020-03-22 | <a href="https://dre.pt/web/guest/legislacao-consolidada/-/lc/130473378/202004042116/73800717/diploma/indice">https://dre.pt/web/guest/legislacao-consolidada/-/lc/130473378/202004042116/73800717/diploma/indice</a>                                                                                                                                                                               |
| Ban of large gatherings |            | Date derived by cumulative share, see Tab. 9                                                                                                                                                                                                                                                                                                                                                        |
| Ban of small gatherings |            | Date derived by cumulative share, see Tab. 9                                                                                                                                                                                                                                                                                                                                                        |
| School closure          |            | Date derived by cumulative share, see Tab. 9                                                                                                                                                                                                                                                                                                                                                        |
| Border closure          | 2020-03-17 | <a href="https://english.elpais.com/society/2020-03-16/spain-closes-its-borders-to-contain-coronavirus.html">https://english.elpais.com/society/2020-03-16/spain-closes-its-borders-to-contain-coronavirus.html</a>                                                                                                                                                                                 |
| Venue closure           |            | Date derived by cumulative share, see Tab. 9                                                                                                                                                                                                                                                                                                                                                        |
| Lockdown                |            | Date derived by cumulative share, see Tab. 9                                                                                                                                                                                                                                                                                                                                                        |
| Work-from-home order    |            | Date derived by cumulative share, see Tab. 9                                                                                                                                                                                                                                                                                                                                                        |
| Ban of large gatherings | 2020-03-11 | <a href="https://www.government.se/articles/2020/03/ordinance-on-a-prohibition-against-holding-public-gatherings-and-events/">https://www.government.se/articles/2020/03/ordinance-on-a-prohibition-against-holding-public-gatherings-and-events/</a>                                                                                                                                               |
| Ban of small gatherings | 2020-03-27 | <a href="https://www.dailymail.co.uk/news/article-8160653/Sweden-bans-gatherings-50-people-threatens-people-six-month-jail-terms.html">https://www.dailymail.co.uk/news/article-8160653/Sweden-bans-gatherings-50-people-threatens-people-six-month-jail-terms.html</a>                                                                                                                             |
| Ban of large gatherings |            | Date derived by cumulative share, see Tab. 13                                                                                                                                                                                                                                                                                                                                                       |

Switzerland

|                         |            |  |                                                                                                                                                                                                                                                                                                                     |
|-------------------------|------------|--|---------------------------------------------------------------------------------------------------------------------------------------------------------------------------------------------------------------------------------------------------------------------------------------------------------------------|
| Ban of small gatherings |            |  | Date derived by cumulative share, see Tab. 13                                                                                                                                                                                                                                                                       |
| School closure          |            |  | Date derived by cumulative share, see Tab. 13                                                                                                                                                                                                                                                                       |
| Border closure          | 2020-03-25 |  | <a href="https://www.bag.admin.ch/bag/it/home/krankheiten/ausbrueche-epidemien-pandemien/aktuelle-ausbrueche-epidemien/novel-cov/massnahmen-des-bundes.html">https://www.bag.admin.ch/bag/it/home/krankheiten/ausbrueche-epidemien-pandemien/aktuelle-ausbrueche-epidemien/novel-cov/massnahmen-des-bundes.html</a> |
| Venue closure           |            |  | Date derived by cumulative share, see Tab. 13                                                                                                                                                                                                                                                                       |
| <hr/>                   |            |  |                                                                                                                                                                                                                                                                                                                     |
| Ban of large gatherings | 2020-03-16 |  | <a href="https://www.gov.uk/guidance/covid-19-guidance-for-mass-gatherings">https://www.gov.uk/guidance/covid-19-guidance-for-mass-gatherings</a>                                                                                                                                                                   |
| Ban of small gatherings | 2020-03-23 |  | <a href="https://www.gov.uk/government/speeches/pm-address-to-the-nation-on-coronavirus-23-march-2020">https://www.gov.uk/government/speeches/pm-address-to-the-nation-on-coronavirus-23-march-2020</a>                                                                                                             |
| School closure          | 2020-03-23 |  | <a href="https://www.gov.uk/government/speeches/pm-statement-on-coronavirus-22-march-2020">https://www.gov.uk/government/speeches/pm-statement-on-coronavirus-22-march-2020</a>                                                                                                                                     |
| Venue closure           | 2020-03-20 |  | <a href="https://www.wsj.com/articles/u-k-escalates-measures-to-fight-coronavirus-11584741690">https://www.wsj.com/articles/u-k-escalates-measures-to-fight-coronavirus-11584741690</a>                                                                                                                             |
| Lockdown                | 2020-03-23 |  | <a href="https://www.gov.uk/government/speeches/pm-address-to-the-nation-on-coronavirus-23-march-2020">https://www.gov.uk/government/speeches/pm-address-to-the-nation-on-coronavirus-23-march-2020</a>                                                                                                             |
| Ban of large gatherings |            |  | Date derived by cumulative share, see Tab. 7                                                                                                                                                                                                                                                                        |
| Ban of small gatherings |            |  | Date derived by cumulative share, see Tab. 7                                                                                                                                                                                                                                                                        |
| School closure          |            |  | Date derived by cumulative share, see Tab. 7                                                                                                                                                                                                                                                                        |
| Border closure          | 2020-03-13 |  | <a href="https://www.theguardian.com/world/2020/mar/11/coronavirus-outbreak-us-trump-latest#maincontent">https://www.theguardian.com/world/2020/mar/11/coronavirus-outbreak-us-trump-latest#maincontent</a>                                                                                                         |
| Venue closure           |            |  | Date derived by cumulative share, see Tab. 7                                                                                                                                                                                                                                                                        |
| Lockdown                |            |  | Date derived by cumulative share, see Tab. 7                                                                                                                                                                                                                                                                        |

Work-from-home or-  
der

Date derived by cumulative share, see Tab. 7

---

**Table 6.** Sources for policies in Switzerland, Austria, Belgium, Denmark, Finland, France, United Kingdom, Greece, Ireland, Luxembourg, Netherlands, Norway, Portugal, Sweden, United States of America, Germany, Italy, Spain, Canada, and Australia

| NPI                     | Date       | Cumulative Region share | Source                                                                                                                                                                                                                                                                                                                                                                                                                                                                                                                                                                                          |
|-------------------------|------------|-------------------------|-------------------------------------------------------------------------------------------------------------------------------------------------------------------------------------------------------------------------------------------------------------------------------------------------------------------------------------------------------------------------------------------------------------------------------------------------------------------------------------------------------------------------------------------------------------------------------------------------|
| Ban of large gatherings | 2020-03-11 | 0.02                    | <a href="https://www.ri.gov/press/view/37892">https://www.ri.gov/press/view/37892</a>                                                                                                                                                                                                                                                                                                                                                                                                                                                                                                           |
| Ban of large gatherings | 2020-03-11 | 0.02                    | <a href="https://governor.ky.gov/covid19">https://governor.ky.gov/covid19</a>                                                                                                                                                                                                                                                                                                                                                                                                                                                                                                                   |
| Ban of large gatherings | 2020-03-11 | 0.02                    | <a href="https://wjla.com/news/coronavirus/dc-health-postponing-cancelling-events-1000-people-through-march">https://wjla.com/news/coronavirus/dc-health-postponing-cancelling-events-1000-people-through-march</a>                                                                                                                                                                                                                                                                                                                                                                             |
| Ban of large gatherings | 2020-03-12 | 0.48                    | <a href="https://governor.maryland.gov/2020/03/12/governor-hogan-announces-major-actions-to-protect-public-health-limit-spread-of-covid-19-pandemic/">https://governor.maryland.gov/2020/03/12/governor-hogan-announces-major-actions-to-protect-public-health-limit-spread-of-covid-19-pandemic/</a>                                                                                                                                                                                                                                                                                           |
| Ban of large gatherings | 2020-03-12 | 0.48                    | <a href="https://lancasteronline.com/news/health/gov-tom-wolf-cancel-large-events-with-more-than-250-people/article_1a6f027c-648e-11ea-aa2f-c787d0825889.html">https://lancasteronline.com/news/health/gov-tom-wolf-cancel-large-events-with-more-than-250-people/article_1a6f027c-648e-11ea-aa2f-c787d0825889.html</a>                                                                                                                                                                                                                                                                         |
| Ban of large gatherings | 2020-03-12 | 0.48                    | <a href="https://www.governor.ny.gov/news/no-2021-continuing-temporary-suspension-and-modification-laws-relating-disaster-emergency">https://www.governor.ny.gov/news/no-2021-continuing-temporary-suspension-and-modification-laws-relating-disaster-emergency</a>                                                                                                                                                                                                                                                                                                                             |
| Ban of large gatherings | 2020-03-12 | 0.48                    | <a href="https://www.oregon.gov/osp/programs/sfm/Pages/Event_Cancellations.aspx">https://www.oregon.gov/osp/programs/sfm/Pages/Event_Cancellations.aspx</a>                                                                                                                                                                                                                                                                                                                                                                                                                                     |
| Ban of large gatherings | 2020-03-12 | 0.48                    | <a href="https://www.cdc.gov/coronavirus/2019-ncov/community/large-events/mass-gatherings-ready-for-covid-19.html">https://www.cdc.gov/coronavirus/2019-ncov/community/large-events/mass-gatherings-ready-for-covid-19.html</a>                                                                                                                                                                                                                                                                                                                                                                 |
| Ban of large gatherings | 2020-03-12 | 0.48                    | <a href="https://coronavirus.ohio.gov/wps/wcm/connect/gov/b815ab52-a571-4e65-9077-32468779671a/DDH+Order+to+Limit+and+Prohibit+Mass+Gatherings%2C+3.12.20.pdf?MOD=AJPERES&amp;CONVERT_TO=url&amp;CACHEID=ROOTWORKSPACE.Z18_M1HGGIKON0J000Q09DDDM3000-b815ab52-a571-4e65-9077-32468779671a-n5828iN">https://coronavirus.ohio.gov/wps/wcm/connect/gov/b815ab52-a571-4e65-9077-32468779671a/DDH+Order+to+Limit+and+Prohibit+Mass+Gatherings%2C+3.12.20.pdf?MOD=AJPERES&amp;CONVERT_TO=url&amp;CACHEID=ROOTWORKSPACE.Z18_M1HGGIKON0J000Q09DDDM3000-b815ab52-a571-4e65-9077-32468779671a-n5828iN</a> |
| Ban of large gatherings | 2020-03-12 | 0.48                    | <a href="https://www.nj.gov/governor/news/news/562020/approved/20200312a.shtml">https://www.nj.gov/governor/news/news/562020/approved/20200312a.shtml</a>                                                                                                                                                                                                                                                                                                                                                                                                                                       |



|                         |            |      |               |                                                                                                                                                                                                                                                                                                                                                                                             |
|-------------------------|------------|------|---------------|---------------------------------------------------------------------------------------------------------------------------------------------------------------------------------------------------------------------------------------------------------------------------------------------------------------------------------------------------------------------------------------------|
| Ban of large gatherings | 2020-03-12 | 0.48 | Mississippi   | <a href="https://www.coronavirus.ms.gov/2019-11/msdh-has-issued-enhanced-protective-recommendations">https://www.coronavirus.ms.gov/2019-11/msdh-has-issued-enhanced-protective-recommendations</a>                                                                                                                                                                                         |
| Ban of large gatherings | 2020-03-12 | 0.48 | Florida       | <a href="https://www.miamiherald.com/news/local/community/miami-dade/article241133076.html">https://www.miamiherald.com/news/local/community/miami-dade/article241133076.html</a>                                                                                                                                                                                                           |
| Ban of large gatherings | 2020-03-12 | 0.48 | New Mexico    | <a href="https://www.governor.state.nm.us/2020/03/12/health-secretary-issues-public-health-order-suspending-mass-gatherings-in-new-mexico/">https://www.governor.state.nm.us/2020/03/12/health-secretary-issues-public-health-order-suspending-mass-gatherings-in-new-mexico/</a>                                                                                                           |
| Ban of large gatherings | 2020-03-12 | 0.48 | Connecticut   | <a href="https://portal.ct.gov/-/media/Office-of-the-Governor/Executive-Orders/Lamont-Executive-Orders/Executive-Order-No-7.pdf?la=en">https://portal.ct.gov/-/media/Office-of-the-Governor/Executive-Orders/Lamont-Executive-Orders/Executive-Order-No-7.pdf?la=en</a>                                                                                                                     |
| Ban of large gatherings | 2020-03-12 | 0.48 | Virginia      | <a href="https://www.governor.virginia.gov/newsroom/all-releases/2020/march/headline-853537-en.html">https://www.governor.virginia.gov/newsroom/all-releases/2020/march/headline-853537-en.html</a>                                                                                                                                                                                         |
| Ban of large gatherings | 2020-03-12 | 0.48 | California    | <a href="https://thehill.com/policy/healthcare/487179-california-governor-calls-for-cancellations-of-large-events">https://thehill.com/policy/healthcare/487179-california-governor-calls-for-cancellations-of-large-events</a>                                                                                                                                                             |
| Ban of large gatherings | 2020-03-12 | 0.48 | West Virginia | <a href="https://governor.wv.gov/News/press-releases/2020/Pages/COVID-UPDATE-Gov.-Justice-announces-State-employee-travel-ban,-basketball-tournament-cancellation-among-latest-precautions.aspx">https://governor.wv.gov/News/press-releases/2020/Pages/COVID-UPDATE-Gov.-Justice-announces-State-employee-travel-ban,-basketball-tournament-cancellation-among-latest-precautions.aspx</a> |
| Ban of large gatherings | 2020-03-12 | 0.48 | Utah          | <a href="https://kutv.com/news/local/live-blog-closures-event-cancellations-more-in-utah-due-to-coronavirus">https://kutv.com/news/local/live-blog-closures-event-cancellations-more-in-utah-due-to-coronavirus</a>                                                                                                                                                                         |
| Ban of large gatherings | 2020-03-13 | 0.63 | Minnesota     | <a href="https://apnews.com/24d6d0c93ded9e8a5c2712df0a045854">https://apnews.com/24d6d0c93ded9e8a5c2712df0a045854</a>                                                                                                                                                                                                                                                                       |
| Ban of large gatherings | 2020-03-13 | 0.63 | Washington    | <a href="https://www.governor.wa.gov/news-media/inslee-announces-statewide-school-closures-expansion-limits-large-gatherings">https://www.governor.wa.gov/news-media/inslee-announces-statewide-school-closures-expansion-limits-large-gatherings</a>                                                                                                                                       |
| Ban of large gatherings | 2020-03-13 | 0.63 | Louisiana     | <a href="https://gov.louisiana.gov/index.cfm/communication/viewcampaign/2548?&amp;uid=hgdtfgl%3Dn7&amp;nowrap=1">https://gov.louisiana.gov/index.cfm/communication/viewcampaign/2548?&amp;uid=hgdtfgl%3Dn7&amp;nowrap=1</a>                                                                                                                                                                 |
| Ban of large gatherings | 2020-03-13 | 0.63 | Arizona       | <a href="https://www.fox10phoenix.com/news/arizona-governor-says-schools-mass-gatherings-events-of-50-or-more-canceled-amid-covid-19-spread">https://www.fox10phoenix.com/news/arizona-governor-says-schools-mass-gatherings-events-of-50-or-more-canceled-amid-covid-19-spread</a>                                                                                                         |

|                         |            |      |                |                                                                                                                                                                                                                                                                           |
|-------------------------|------------|------|----------------|---------------------------------------------------------------------------------------------------------------------------------------------------------------------------------------------------------------------------------------------------------------------------|
| Ban of large gatherings | 2020-03-13 | 0.63 | Massachusetts  | <a href="https://www.mass.gov/news/governor-baker-issues-order-limiting-large-gatherings-in-the-commonwealth">https://www.mass.gov/news/governor-baker-issues-order-limiting-large-gatherings-in-the-commonwealth</a>                                                     |
| Ban of large gatherings | 2020-03-13 | 0.63 | Michigan       | <a href="https://www.michigan.gov/whitmer/0,9309,7-387-90499_90705-521595--,00.html">https://www.michigan.gov/whitmer/0,9309,7-387-90499_90705-521595--,00.html</a>                                                                                                       |
| Ban of large gatherings | 2020-03-13 | 0.63 | Tennessee      | <a href="https://www.tn.gov/governor/news/2020/3/13/governor-lee-issues-guidance-for-mass-gatherings--schools-and-state-workforce.html">https://www.tn.gov/governor/news/2020/3/13/governor-lee-issues-guidance-for-mass-gatherings--schools-and-state-workforce.html</a> |
| Ban of large gatherings | 2020-03-14 | 0.66 | North Carolina | <a href="https://files.nc.gov/governor/documents/files/E0117-COVID-19-Prohibiting-Mass-Gathering-and-K12-School-Closure.pdf">https://files.nc.gov/governor/documents/files/E0117-COVID-19-Prohibiting-Mass-Gathering-and-K12-School-Closure.pdf</a>                       |
| Ban of large gatherings | 2020-03-15 | 0.67 | Puerto Rico    | <a href="https://www.estado.pr.gov/es/ordenes-ejecutivas/">https://www.estado.pr.gov/es/ordenes-ejecutivas/</a>                                                                                                                                                           |
| Ban of large gatherings | 2020-03-16 | 1.00 | South Carolina | <a href="https://eu.usatoday.com/story/news/health/2020/03/16/coronavirus-live-updates-us-death-toll-rises-cases-testing/5053816002/">https://eu.usatoday.com/story/news/health/2020/03/16/coronavirus-live-updates-us-death-toll-rises-cases-testing/5053816002/</a>     |
| Ban of large gatherings | 2020-03-16 | 1.00 | Oklahoma       | <a href="https://eu.usatoday.com/story/news/health/2020/03/16/coronavirus-live-updates-us-death-toll-rises-cases-testing/5053816002/">https://eu.usatoday.com/story/news/health/2020/03/16/coronavirus-live-updates-us-death-toll-rises-cases-testing/5053816002/</a>     |
| Ban of large gatherings | 2020-03-16 | 1.00 | South Dakota   | <a href="https://eu.usatoday.com/story/news/health/2020/03/16/coronavirus-live-updates-us-death-toll-rises-cases-testing/5053816002/">https://eu.usatoday.com/story/news/health/2020/03/16/coronavirus-live-updates-us-death-toll-rises-cases-testing/5053816002/</a>     |
| Ban of large gatherings | 2020-03-16 | 1.00 | North Dakota   | <a href="https://eu.usatoday.com/story/news/health/2020/03/16/coronavirus-live-updates-us-death-toll-rises-cases-testing/5053816002/">https://eu.usatoday.com/story/news/health/2020/03/16/coronavirus-live-updates-us-death-toll-rises-cases-testing/5053816002/</a>     |
| Ban of large gatherings | 2020-03-16 | 1.00 | Texas          | <a href="https://eu.usatoday.com/story/news/health/2020/03/16/coronavirus-live-updates-us-death-toll-rises-cases-testing/5053816002/">https://eu.usatoday.com/story/news/health/2020/03/16/coronavirus-live-updates-us-death-toll-rises-cases-testing/5053816002/</a>     |
| Ban of large gatherings | 2020-03-16 | 1.00 | Vermont        | <a href="https://eu.usatoday.com/story/news/health/2020/03/16/coronavirus-live-updates-us-death-toll-rises-cases-testing/5053816002/">https://eu.usatoday.com/story/news/health/2020/03/16/coronavirus-live-updates-us-death-toll-rises-cases-testing/5053816002/</a>     |
| Ban of large gatherings | 2020-03-16 | 1.00 | Alabama        | <a href="https://eu.usatoday.com/story/news/health/2020/03/16/coronavirus-live-updates-us-death-toll-rises-cases-testing/5053816002/">https://eu.usatoday.com/story/news/health/2020/03/16/coronavirus-live-updates-us-death-toll-rises-cases-testing/5053816002/</a>     |
| Ban of large gatherings | 2020-03-16 | 1.00 | Missouri       | <a href="https://governor.mo.gov/press-releases/archive/governor-parsons-statement-regarding-cdc-recommendations-mass-gatherings-and">https://governor.mo.gov/press-releases/archive/governor-parsons-statement-regarding-cdc-recommendations-mass-gatherings-and</a>     |

|                         |            |      |               |                                                                                                                                                                                                                                                                       |
|-------------------------|------------|------|---------------|-----------------------------------------------------------------------------------------------------------------------------------------------------------------------------------------------------------------------------------------------------------------------|
| Ban of large gatherings | 2020-03-16 | 1.00 | Nevada        | <a href="https://eu.usatoday.com/story/news/health/2020/03/16/coronavirus-live-updates-us-death-toll-rises-cases-testing/5053816002/">https://eu.usatoday.com/story/news/health/2020/03/16/coronavirus-live-updates-us-death-toll-rises-cases-testing/5053816002/</a> |
| Ban of large gatherings | 2020-03-16 | 1.00 | Alaska        | <a href="https://eu.usatoday.com/story/news/health/2020/03/16/coronavirus-live-updates-us-death-toll-rises-cases-testing/5053816002/">https://eu.usatoday.com/story/news/health/2020/03/16/coronavirus-live-updates-us-death-toll-rises-cases-testing/5053816002/</a> |
| Ban of large gatherings | 2020-03-16 | 1.00 | Arkansas      | <a href="https://eu.usatoday.com/story/news/health/2020/03/16/coronavirus-live-updates-us-death-toll-rises-cases-testing/5053816002/">https://eu.usatoday.com/story/news/health/2020/03/16/coronavirus-live-updates-us-death-toll-rises-cases-testing/5053816002/</a> |
| Ban of large gatherings | 2020-03-16 | 1.00 | Colorado      | <a href="https://northglenn-thorntonsentinel.com/stories/colorado-events-of-50-people-no-sit-down-restaurants-bars,296332">https://northglenn-thorntonsentinel.com/stories/colorado-events-of-50-people-no-sit-down-restaurants-bars,296332</a>                       |
| Ban of large gatherings | 2020-03-16 | 1.00 | Delaware      | <a href="https://eu.usatoday.com/story/news/health/2020/03/16/coronavirus-live-updates-us-death-toll-rises-cases-testing/5053816002/">https://eu.usatoday.com/story/news/health/2020/03/16/coronavirus-live-updates-us-death-toll-rises-cases-testing/5053816002/</a> |
| Ban of large gatherings | 2020-03-16 | 1.00 | Georgia       | <a href="https://eu.usatoday.com/story/news/health/2020/03/16/coronavirus-live-updates-us-death-toll-rises-cases-testing/5053816002/">https://eu.usatoday.com/story/news/health/2020/03/16/coronavirus-live-updates-us-death-toll-rises-cases-testing/5053816002/</a> |
| Ban of large gatherings | 2020-03-16 | 1.00 | Hawaii        | <a href="https://eu.usatoday.com/story/news/health/2020/03/16/coronavirus-live-updates-us-death-toll-rises-cases-testing/5053816002/">https://eu.usatoday.com/story/news/health/2020/03/16/coronavirus-live-updates-us-death-toll-rises-cases-testing/5053816002/</a> |
| Ban of large gatherings | 2020-03-16 | 1.00 | New Hampshire | <a href="https://www.governor.nh.gov/news-media/press-2020/20200316-covid-10-businesses.htm">https://www.governor.nh.gov/news-media/press-2020/20200316-covid-10-businesses.htm</a>                                                                                   |
| Ban of large gatherings | 2020-03-16 | 1.00 | Idaho         | <a href="https://eu.usatoday.com/story/news/health/2020/03/16/coronavirus-live-updates-us-death-toll-rises-cases-testing/5053816002/">https://eu.usatoday.com/story/news/health/2020/03/16/coronavirus-live-updates-us-death-toll-rises-cases-testing/5053816002/</a> |
| Ban of large gatherings | 2020-03-16 | 1.00 | Iowa          | <a href="https://eu.usatoday.com/story/news/health/2020/03/16/coronavirus-live-updates-us-death-toll-rises-cases-testing/5053816002/">https://eu.usatoday.com/story/news/health/2020/03/16/coronavirus-live-updates-us-death-toll-rises-cases-testing/5053816002/</a> |
| Ban of large gatherings | 2020-03-16 | 1.00 | Kansas        | <a href="https://govstatus.egov.com/coronavirus">https://govstatus.egov.com/coronavirus</a>                                                                                                                                                                           |
| Ban of large gatherings | 2020-03-16 | 1.00 | Maine         | <a href="https://eu.usatoday.com/story/news/health/2020/03/16/coronavirus-live-updates-us-death-toll-rises-cases-testing/5053816002/">https://eu.usatoday.com/story/news/health/2020/03/16/coronavirus-live-updates-us-death-toll-rises-cases-testing/5053816002/</a> |
| Ban of large gatherings | 2020-03-16 | 1.00 | Wisconsin     | <a href="https://content.govdelivery.com/accounts/WIGOV/bulletins/2817964">https://content.govdelivery.com/accounts/WIGOV/bulletins/2817964</a>                                                                                                                       |

| Ban of large gatherings | 2020-03-16 | 1.00             | Montana       | <a href="https://eu.usatoday.com/story/news/health/2020/03/16/coronavirus-live-updates-us-death-toll-rises-cases-testing/5053816002/">https://eu.usatoday.com/story/news/health/2020/03/16/coronavirus-live-updates-us-death-toll-rises-cases-testing/5053816002/</a>                                                                                                                                                               |
|-------------------------|------------|------------------|---------------|-------------------------------------------------------------------------------------------------------------------------------------------------------------------------------------------------------------------------------------------------------------------------------------------------------------------------------------------------------------------------------------------------------------------------------------|
| Ban of large gatherings | 2020-03-16 | 1.00             | Nebraska      | <a href="https://eu.usatoday.com/story/news/health/2020/03/16/coronavirus-live-updates-us-death-toll-rises-cases-testing/5053816002/">https://eu.usatoday.com/story/news/health/2020/03/16/coronavirus-live-updates-us-death-toll-rises-cases-testing/5053816002/</a>                                                                                                                                                               |
| Ban of large gatherings | 2020-03-16 | 1.00             | Illinois      | <a href="https://herald-review.com/news/state-and-regional/govt-and-politics/monday-update-pritzker-bans-gatherings-of-50-or-more-12-new-illinois-cases-announced/article_c5fa6e55-70f4-583b-aea9-09ce2315eb16.html">https://herald-review.com/news/state-and-regional/govt-and-politics/monday-update-pritzker-bans-gatherings-of-50-or-more-12-new-illinois-cases-announced/article_c5fa6e55-70f4-583b-aea9-09ce2315eb16.html</a> |
| Ban of large gatherings | 2020-03-16 | 1.00             | Wyoming       | <a href="https://eu.usatoday.com/story/news/health/2020/03/16/coronavirus-live-updates-us-death-toll-rises-cases-testing/5053816002/">https://eu.usatoday.com/story/news/health/2020/03/16/coronavirus-live-updates-us-death-toll-rises-cases-testing/5053816002/</a>                                                                                                                                                               |
| NPI                     | Date       | Cumulative share | Region        | Source                                                                                                                                                                                                                                                                                                                                                                                                                              |
| Ban of small gatherings | 2020-03-11 | 0.01             | Kentucky      | <a href="https://governor.ky.gov/covid19">https://governor.ky.gov/covid19</a>                                                                                                                                                                                                                                                                                                                                                       |
| Ban of small gatherings | 2020-03-13 | 0.04             | Arizona       | <a href="https://www.fox10phoenix.com/news/arizona-governor-says-schools-mass-gatherings-events-of-50-or-more-canceled-amid-covid-19-spread">https://www.fox10phoenix.com/news/arizona-governor-says-schools-mass-gatherings-events-of-50-or-more-canceled-amid-covid-19-spread</a>                                                                                                                                                 |
| Ban of small gatherings | 2020-03-15 | 0.05             | Puerto Rico   | <a href="https://www.estado.pr.gov/es/ordenes-ejecutivas/">https://www.estado.pr.gov/es/ordenes-ejecutivas/</a>                                                                                                                                                                                                                                                                                                                     |
| Ban of small gatherings | 2020-03-16 | 1.00             | New Hampshire | <a href="https://www.governor.nh.gov/news-media/press-2020/20200316-covid-10-businesses.htm">https://www.governor.nh.gov/news-media/press-2020/20200316-covid-10-businesses.htm</a>                                                                                                                                                                                                                                                 |
| Ban of small gatherings | 2020-03-16 | 1.00             | New Jersey    | <a href="https://www.governor.nh.gov/news-media/press-2020/20200315-emergency-order-1.html">https://www.governor.nh.gov/news-media/press-2020/20200315-emergency-order-1.html</a>                                                                                                                                                                                                                                                   |
| Ban of small gatherings | 2020-03-16 | 1.00             | New Mexico    | <a href="https://eu.usatoday.com/story/news/health/2020/03/16/coronavirus-live-updates-us-death-toll-rises-cases-testing/5053816002/">https://eu.usatoday.com/story/news/health/2020/03/16/coronavirus-live-updates-us-death-toll-rises-cases-testing/5053816002/</a>                                                                                                                                                               |
| Ban of small gatherings | 2020-03-16 | 1.00             | New York      | <a href="https://eu.usatoday.com/story/news/health/2020/03/16/coronavirus-live-updates-us-death-toll-rises-cases-testing/5053816002/">https://eu.usatoday.com/story/news/health/2020/03/16/coronavirus-live-updates-us-death-toll-rises-cases-testing/5053816002/</a>                                                                                                                                                               |

|                         |            |      |                |                                                                                                                                                                                                                                                                                                                                                                       |
|-------------------------|------------|------|----------------|-----------------------------------------------------------------------------------------------------------------------------------------------------------------------------------------------------------------------------------------------------------------------------------------------------------------------------------------------------------------------|
| Ban of small gatherings | 2020-03-16 | 1.00 | North Carolina | <a href="https://eu.usatoday.com/story/news/health/2020/03/16/coronavirus-live-updates-us-death-toll-rises-cases-testing/5053816002/">https://eu.usatoday.com/story/news/health/2020/03/16/coronavirus-live-updates-us-death-toll-rises-cases-testing/5053816002/</a>                                                                                                 |
| Ban of small gatherings | 2020-03-16 | 1.00 | North Dakota   | <a href="https://eu.usatoday.com/story/news/health/2020/03/16/coronavirus-live-updates-us-death-toll-rises-cases-testing/5053816002/">https://eu.usatoday.com/story/news/health/2020/03/16/coronavirus-live-updates-us-death-toll-rises-cases-testing/5053816002/</a>                                                                                                 |
| Ban of small gatherings | 2020-03-16 | 1.00 | Ohio           | <a href="https://eu.usatoday.com/story/news/health/2020/03/16/coronavirus-live-updates-us-death-toll-rises-cases-testing/5053816002/">https://eu.usatoday.com/story/news/health/2020/03/16/coronavirus-live-updates-us-death-toll-rises-cases-testing/5053816002/</a>                                                                                                 |
| Ban of small gatherings | 2020-03-16 | 1.00 | Oklahoma       | <a href="https://eu.usatoday.com/story/news/health/2020/03/16/coronavirus-live-updates-us-death-toll-rises-cases-testing/5053816002/">https://eu.usatoday.com/story/news/health/2020/03/16/coronavirus-live-updates-us-death-toll-rises-cases-testing/5053816002/</a>                                                                                                 |
| Ban of small gatherings | 2020-03-16 | 1.00 | Oregon         | <a href="https://www.kptv.com/news/covid--in-oregon-governor-cancels-gatherings-of-more-than/article_8e9aafec-67d2-11ea-af7f-2bad23d52443.html">https://www.kptv.com/news/covid--in-oregon-governor-cancels-gatherings-of-more-than/article_8e9aafec-67d2-11ea-af7f-2bad23d52443.html</a>                                                                             |
| Ban of small gatherings | 2020-03-16 | 1.00 | Pennsylvania   | <a href="https://www.governor.pa.gov/newsroom/gov-wolf-puts-statewide-covid-19-mitigation-efforts-in-effect-stresses-need-for-every-pennsylvanian-to-take-action-to-stop-the-spread/">https://www.governor.pa.gov/newsroom/gov-wolf-puts-statewide-covid-19-mitigation-efforts-in-effect-stresses-need-for-every-pennsylvanian-to-take-action-to-stop-the-spread/</a> |
| Ban of small gatherings | 2020-03-16 | 1.00 | Alabama        | <a href="https://governor.alabama.gov/assets/2020/03/Amended-Statewide-Social-Distancing-SHO-Order-3.27.2020-FINAL.pdf">https://governor.alabama.gov/assets/2020/03/Amended-Statewide-Social-Distancing-SHO-Order-3.27.2020-FINAL.pdf</a>                                                                                                                             |
| Ban of small gatherings | 2020-03-16 | 1.00 | Rhode Island   | <a href="https://eu.usatoday.com/story/news/health/2020/03/16/coronavirus-live-updates-us-death-toll-rises-cases-testing/5053816002/">https://eu.usatoday.com/story/news/health/2020/03/16/coronavirus-live-updates-us-death-toll-rises-cases-testing/5053816002/</a>                                                                                                 |
| Ban of small gatherings | 2020-03-16 | 1.00 | South Carolina | <a href="https://eu.usatoday.com/story/news/health/2020/03/16/coronavirus-live-updates-us-death-toll-rises-cases-testing/5053816002/">https://eu.usatoday.com/story/news/health/2020/03/16/coronavirus-live-updates-us-death-toll-rises-cases-testing/5053816002/</a>                                                                                                 |
| Ban of small gatherings | 2020-03-16 | 1.00 | South Dakota   | <a href="https://eu.usatoday.com/story/news/health/2020/03/16/coronavirus-live-updates-us-death-toll-rises-cases-testing/5053816002/">https://eu.usatoday.com/story/news/health/2020/03/16/coronavirus-live-updates-us-death-toll-rises-cases-testing/5053816002/</a>                                                                                                 |
| Ban of small gatherings | 2020-03-16 | 1.00 | Tennessee      | <a href="https://eu.usatoday.com/story/news/health/2020/03/16/coronavirus-live-updates-us-death-toll-rises-cases-testing/5053816002/">https://eu.usatoday.com/story/news/health/2020/03/16/coronavirus-live-updates-us-death-toll-rises-cases-testing/5053816002/</a>                                                                                                 |
| Ban of small gatherings | 2020-03-16 | 1.00 | Texas          | <a href="https://eu.usatoday.com/story/news/health/2020/03/16/coronavirus-live-updates-us-death-toll-rises-cases-testing/5053816002/">https://eu.usatoday.com/story/news/health/2020/03/16/coronavirus-live-updates-us-death-toll-rises-cases-testing/5053816002/</a>                                                                                                 |

|                         |            |      |               |                                                                                                                                                                                                                                                                       |
|-------------------------|------------|------|---------------|-----------------------------------------------------------------------------------------------------------------------------------------------------------------------------------------------------------------------------------------------------------------------|
| Ban of small gatherings | 2020-03-16 | 1.00 | Utah          | <a href="https://eu.usatoday.com/story/news/health/2020/03/16/coronavirus-live-updates-us-death-toll-rises-cases-testing/5053816002/">https://eu.usatoday.com/story/news/health/2020/03/16/coronavirus-live-updates-us-death-toll-rises-cases-testing/5053816002/</a> |
| Ban of small gatherings | 2020-03-16 | 1.00 | Vermont       | <a href="https://eu.usatoday.com/story/news/health/2020/03/16/coronavirus-live-updates-us-death-toll-rises-cases-testing/5053816002/">https://eu.usatoday.com/story/news/health/2020/03/16/coronavirus-live-updates-us-death-toll-rises-cases-testing/5053816002/</a> |
| Ban of small gatherings | 2020-03-16 | 1.00 | Virginia      | <a href="https://eu.usatoday.com/story/news/health/2020/03/16/coronavirus-live-updates-us-death-toll-rises-cases-testing/5053816002/">https://eu.usatoday.com/story/news/health/2020/03/16/coronavirus-live-updates-us-death-toll-rises-cases-testing/5053816002/</a> |
| Ban of small gatherings | 2020-03-16 | 1.00 | Washington    | <a href="https://eu.usatoday.com/story/news/health/2020/03/16/coronavirus-live-updates-us-death-toll-rises-cases-testing/5053816002/">https://eu.usatoday.com/story/news/health/2020/03/16/coronavirus-live-updates-us-death-toll-rises-cases-testing/5053816002/</a> |
| Ban of small gatherings | 2020-03-16 | 1.00 | West Virginia | <a href="https://eu.usatoday.com/story/news/health/2020/03/16/coronavirus-live-updates-us-death-toll-rises-cases-testing/5053816002/">https://eu.usatoday.com/story/news/health/2020/03/16/coronavirus-live-updates-us-death-toll-rises-cases-testing/5053816002/</a> |
| Ban of small gatherings | 2020-03-16 | 1.00 | Nevada        | <a href="https://eu.usatoday.com/story/news/health/2020/03/16/coronavirus-live-updates-us-death-toll-rises-cases-testing/5053816002/">https://eu.usatoday.com/story/news/health/2020/03/16/coronavirus-live-updates-us-death-toll-rises-cases-testing/5053816002/</a> |
| Ban of small gatherings | 2020-03-16 | 1.00 | Nebraska      | <a href="https://eu.usatoday.com/story/news/health/2020/03/16/coronavirus-live-updates-us-death-toll-rises-cases-testing/5053816002/">https://eu.usatoday.com/story/news/health/2020/03/16/coronavirus-live-updates-us-death-toll-rises-cases-testing/5053816002/</a> |
| Ban of small gatherings | 2020-03-16 | 1.00 | Missouri      | <a href="https://eu.usatoday.com/story/news/health/2020/03/16/coronavirus-live-updates-us-death-toll-rises-cases-testing/5053816002/">https://eu.usatoday.com/story/news/health/2020/03/16/coronavirus-live-updates-us-death-toll-rises-cases-testing/5053816002/</a> |
| Ban of small gatherings | 2020-03-16 | 1.00 | Wisconsin     | <a href="https://content.govdelivery.com/accounts/WIGOV/bulletins/2817964">https://content.govdelivery.com/accounts/WIGOV/bulletins/2817964</a>                                                                                                                       |
| Ban of small gatherings | 2020-03-16 | 1.00 | Alaska        | <a href="https://eu.usatoday.com/story/news/health/2020/03/16/coronavirus-live-updates-us-death-toll-rises-cases-testing/5053816002/">https://eu.usatoday.com/story/news/health/2020/03/16/coronavirus-live-updates-us-death-toll-rises-cases-testing/5053816002/</a> |
| Ban of small gatherings | 2020-03-16 | 1.00 | Arkansas      | <a href="https://eu.usatoday.com/story/news/health/2020/03/16/coronavirus-live-updates-us-death-toll-rises-cases-testing/5053816002/">https://eu.usatoday.com/story/news/health/2020/03/16/coronavirus-live-updates-us-death-toll-rises-cases-testing/5053816002/</a> |
| Ban of small gatherings | 2020-03-16 | 1.00 | California    | <a href="https://eu.usatoday.com/story/news/health/2020/03/16/coronavirus-live-updates-us-death-toll-rises-cases-testing/5053816002/">https://eu.usatoday.com/story/news/health/2020/03/16/coronavirus-live-updates-us-death-toll-rises-cases-testing/5053816002/</a> |
| Ban of small gatherings | 2020-03-16 | 1.00 | Colorado      | <a href="https://northglenn-thorntonsentinel.com/stories/colorado-events-of-50-people-no-sit-down-restaurants-bars,296332">https://northglenn-thorntonsentinel.com/stories/colorado-events-of-50-people-no-sit-down-restaurants-bars,296332</a>                       |

|                         |            |      |                      |                                                                                                                                                                                                                                                                       |
|-------------------------|------------|------|----------------------|-----------------------------------------------------------------------------------------------------------------------------------------------------------------------------------------------------------------------------------------------------------------------|
| Ban of small gatherings | 2020-03-16 | 1.00 | Connecticut          | <a href="https://eu.usatoday.com/story/news/health/2020/03/16/coronavirus-live-updates-us-death-toll-rises-cases-testing/5053816002/">https://eu.usatoday.com/story/news/health/2020/03/16/coronavirus-live-updates-us-death-toll-rises-cases-testing/5053816002/</a> |
| Ban of small gatherings | 2020-03-16 | 1.00 | Delaware             | <a href="https://eu.usatoday.com/story/news/health/2020/03/16/coronavirus-live-updates-us-death-toll-rises-cases-testing/5053816002/">https://eu.usatoday.com/story/news/health/2020/03/16/coronavirus-live-updates-us-death-toll-rises-cases-testing/5053816002/</a> |
| Ban of small gatherings | 2020-03-16 | 1.00 | District of Columbia | <a href="https://dc.gov/release/mayor/E2%80%99s-order-2020-048-prohibition-mass-gatherings-during-public-health-emergency">https://dc.gov/release/mayor/E2%80%99s-order-2020-048-prohibition-mass-gatherings-during-public-health-emergency</a>                       |
| Ban of small gatherings | 2020-03-16 | 1.00 | Florida              | <a href="https://eu.usatoday.com/story/news/health/2020/03/16/coronavirus-live-updates-us-death-toll-rises-cases-testing/5053816002/">https://eu.usatoday.com/story/news/health/2020/03/16/coronavirus-live-updates-us-death-toll-rises-cases-testing/5053816002/</a> |
| Ban of small gatherings | 2020-03-16 | 1.00 | Georgia              | <a href="https://eu.usatoday.com/story/news/health/2020/03/16/coronavirus-live-updates-us-death-toll-rises-cases-testing/5053816002/">https://eu.usatoday.com/story/news/health/2020/03/16/coronavirus-live-updates-us-death-toll-rises-cases-testing/5053816002/</a> |
| Ban of small gatherings | 2020-03-16 | 1.00 | Hawaii               | <a href="https://eu.usatoday.com/story/news/health/2020/03/16/coronavirus-live-updates-us-death-toll-rises-cases-testing/5053816002/">https://eu.usatoday.com/story/news/health/2020/03/16/coronavirus-live-updates-us-death-toll-rises-cases-testing/5053816002/</a> |
| Ban of small gatherings | 2020-03-16 | 1.00 | Montana              | <a href="https://eu.usatoday.com/story/news/health/2020/03/16/coronavirus-live-updates-us-death-toll-rises-cases-testing/5053816002/">https://eu.usatoday.com/story/news/health/2020/03/16/coronavirus-live-updates-us-death-toll-rises-cases-testing/5053816002/</a> |
| Ban of small gatherings | 2020-03-16 | 1.00 | Idaho                | <a href="https://eu.usatoday.com/story/news/health/2020/03/16/coronavirus-live-updates-us-death-toll-rises-cases-testing/5053816002/">https://eu.usatoday.com/story/news/health/2020/03/16/coronavirus-live-updates-us-death-toll-rises-cases-testing/5053816002/</a> |
| Ban of small gatherings | 2020-03-16 | 1.00 | Indiana              | <a href="https://eu.usatoday.com/story/news/health/2020/03/16/coronavirus-live-updates-us-death-toll-rises-cases-testing/5053816002/">https://eu.usatoday.com/story/news/health/2020/03/16/coronavirus-live-updates-us-death-toll-rises-cases-testing/5053816002/</a> |
| Ban of small gatherings | 2020-03-16 | 1.00 | Iowa                 | <a href="https://eu.usatoday.com/story/news/health/2020/03/16/coronavirus-live-updates-us-death-toll-rises-cases-testing/5053816002/">https://eu.usatoday.com/story/news/health/2020/03/16/coronavirus-live-updates-us-death-toll-rises-cases-testing/5053816002/</a> |
| Ban of small gatherings | 2020-03-16 | 1.00 | Kansas               | <a href="https://govstatus.egov.com/coronavirus">https://govstatus.egov.com/coronavirus</a>                                                                                                                                                                           |
| Ban of small gatherings | 2020-03-16 | 1.00 | Louisiana            | <a href="https://eu.usatoday.com/story/news/health/2020/03/16/coronavirus-live-updates-us-death-toll-rises-cases-testing/5053816002/">https://eu.usatoday.com/story/news/health/2020/03/16/coronavirus-live-updates-us-death-toll-rises-cases-testing/5053816002/</a> |
| Ban of small gatherings | 2020-03-16 | 1.00 | Maine                | <a href="https://eu.usatoday.com/story/news/health/2020/03/16/coronavirus-live-updates-us-death-toll-rises-cases-testing/5053816002/">https://eu.usatoday.com/story/news/health/2020/03/16/coronavirus-live-updates-us-death-toll-rises-cases-testing/5053816002/</a> |

|                         |            |      |               |                                                                                                                                                                                                                                                                       |
|-------------------------|------------|------|---------------|-----------------------------------------------------------------------------------------------------------------------------------------------------------------------------------------------------------------------------------------------------------------------|
| Ban of small gatherings | 2020-03-16 | 1.00 | Maryland      | <a href="https://eu.usatoday.com/story/news/health/2020/03/16/coronavirus-live-updates-us-death-toll-rises-cases-testing/5053816002/">https://eu.usatoday.com/story/news/health/2020/03/16/coronavirus-live-updates-us-death-toll-rises-cases-testing/5053816002/</a> |
| Ban of small gatherings | 2020-03-16 | 1.00 | Massachusetts | <a href="https://eu.usatoday.com/story/news/health/2020/03/16/coronavirus-live-updates-us-death-toll-rises-cases-testing/5053816002/">https://eu.usatoday.com/story/news/health/2020/03/16/coronavirus-live-updates-us-death-toll-rises-cases-testing/5053816002/</a> |
| Ban of small gatherings | 2020-03-16 | 1.00 | Michigan      | <a href="https://www.michigan.gov/whitmer/0,9309,7-387-90499_90705-521890--,00.html">https://www.michigan.gov/whitmer/0,9309,7-387-90499_90705-521890--,00.html</a>                                                                                                   |
| Ban of small gatherings | 2020-03-16 | 1.00 | Minnesota     | <a href="https://eu.usatoday.com/story/news/health/2020/03/16/coronavirus-live-updates-us-death-toll-rises-cases-testing/5053816002/">https://eu.usatoday.com/story/news/health/2020/03/16/coronavirus-live-updates-us-death-toll-rises-cases-testing/5053816002/</a> |
| Ban of small gatherings | 2020-03-16 | 1.00 | Mississippi   | <a href="https://eu.usatoday.com/story/news/health/2020/03/16/coronavirus-live-updates-us-death-toll-rises-cases-testing/5053816002/">https://eu.usatoday.com/story/news/health/2020/03/16/coronavirus-live-updates-us-death-toll-rises-cases-testing/5053816002/</a> |
| Ban of small gatherings | 2020-03-16 | 1.00 | Illinois      | <a href="https://eu.usatoday.com/story/news/health/2020/03/16/coronavirus-live-updates-us-death-toll-rises-cases-testing/5053816002/">https://eu.usatoday.com/story/news/health/2020/03/16/coronavirus-live-updates-us-death-toll-rises-cases-testing/5053816002/</a> |
| Ban of small gatherings | 2020-03-16 | 1.00 | Wyoming       | <a href="https://eu.usatoday.com/story/news/health/2020/03/16/coronavirus-live-updates-us-death-toll-rises-cases-testing/5053816002/">https://eu.usatoday.com/story/news/health/2020/03/16/coronavirus-live-updates-us-death-toll-rises-cases-testing/5053816002/</a> |

| NPI            | Date       | Cumulative share | Region        | Source                                                                                                                                                                                                                                                                              |
|----------------|------------|------------------|---------------|-------------------------------------------------------------------------------------------------------------------------------------------------------------------------------------------------------------------------------------------------------------------------------------|
| School closure | 2020-03-12 | 0.01             | New Mexico    | <a href="https://www.governor.state.nm.us/2020/03/12/new-mexico-schools-to-temporarily-close/">https://www.governor.state.nm.us/2020/03/12/new-mexico-schools-to-temporarily-close/</a>                                                                                             |
| School closure | 2020-03-13 | 0.05             | West Virginia | <a href="https://governor.wv.gov/News/press-releases/2020/Pages/COVID19-UPDATE-Gov.-Justice-announces-closure-of-West-Virginia-schools.aspx">https://governor.wv.gov/News/press-releases/2020/Pages/COVID19-UPDATE-Gov.-Justice-announces-closure-of-West-Virginia-schools.aspx</a> |
| School closure | 2020-03-13 | 0.05             | Washington    | <a href="https://www.governor.wa.gov/news-media/inslee-announces-statewide-school-closures-expansion-limits-large-gatherings">https://www.governor.wa.gov/news-media/inslee-announces-statewide-school-closures-expansion-limits-large-gatherings</a>                               |
| School closure | 2020-03-13 | 0.05             | Wisconsin     | <a href="https://content.govdelivery.com/accounts/WIGOV/bulletins/281127d">https://content.govdelivery.com/accounts/WIGOV/bulletins/281127d</a>                                                                                                                                     |
| School closure | 2020-03-15 | 0.06             | Montana       | <a href="http://opi.mt.gov/COVID-19-Information">http://opi.mt.gov/COVID-19-Information</a>                                                                                                                                                                                         |



|                |            |      |                |                                                                                                                                                                                                                                                                                                                                                                                                                                                                                                                         |
|----------------|------------|------|----------------|-------------------------------------------------------------------------------------------------------------------------------------------------------------------------------------------------------------------------------------------------------------------------------------------------------------------------------------------------------------------------------------------------------------------------------------------------------------------------------------------------------------------------|
| School closure | 2020-03-16 | 0.50 | Nevada         | <a href="http://www.doe.nv.gov">http://www.doe.nv.gov</a>                                                                                                                                                                                                                                                                                                                                                                                                                                                               |
| School closure | 2020-03-16 | 0.50 | New Hampshire  | <a href="https://www.governor.nh.gov/news-media/press-2020/20200315-emergency-order-1.html">https://www.governor.nh.gov/news-media/press-2020/20200315-emergency-order-1.html</a>                                                                                                                                                                                                                                                                                                                                       |
| School closure | 2020-03-16 | 0.50 | New York       | <a href="https://www.governor.ny.gov/news/governor-cuomo-signs-executive-order-closing-schools-statewide-two-weeks">https://www.governor.ny.gov/news/governor-cuomo-signs-executive-order-closing-schools-statewide-two-weeks</a>                                                                                                                                                                                                                                                                                       |
| School closure | 2020-03-16 | 0.50 | North Carolina | <a href="https://www.dpi.nc.gov/news/press-releases/2020/03/16/state-board-issues-guidance-personnel-facility-matters-covid-19-closure">https://www.dpi.nc.gov/news/press-releases/2020/03/16/state-board-issues-guidance-personnel-facility-matters-covid-19-closure</a>                                                                                                                                                                                                                                               |
| School closure | 2020-03-16 | 0.50 | North Dakota   | <a href="https://www.nd.gov/dpi/school-closure-frequently-asked-questions">https://www.nd.gov/dpi/school-closure-frequently-asked-questions</a>                                                                                                                                                                                                                                                                                                                                                                         |
| School closure | 2020-03-16 | 0.50 | Pennsylvania   | <a href="https://www.governor.pa.gov/newsroom/governor-wolf-announces-closure-of-pennsylvania-schools/">https://www.governor.pa.gov/newsroom/governor-wolf-announces-closure-of-pennsylvania-schools/</a>                                                                                                                                                                                                                                                                                                               |
| School closure | 2020-03-16 | 0.50 | Puerto Rico    | <a href="https://twitter.com/wandavazquezg?ref_src=twsrc%5Etfw%7Ctwcamp%5Etweetembed%7Ctterm%5E1238675549372977153%7Ctgr%5E&amp;ref_url=https%3A%2F%2Fwww.nbcnews.com%2Fhealth%2Fhealth-news%2Flive-blog%2F2020-03-14-coronavirus-news-n1158821%2Fncrd1158961">https://twitter.com/wandavazquezg?ref_src=twsrc%5Etfw%7Ctwcamp%5Etweetembed%7Ctterm%5E1238675549372977153%7Ctgr%5E&amp;ref_url=https%3A%2F%2Fwww.nbcnews.com%2Fhealth%2Fhealth-news%2Flive-blog%2F2020-03-14-coronavirus-news-n1158821%2Fncrd1158961</a> |
| School closure | 2020-03-16 | 0.50 | South Carolina | <a href="https://thehill.com/homenews/state-watch/487708-south-carolina-closes-schools-amid-outbreak">https://thehill.com/homenews/state-watch/487708-south-carolina-closes-schools-amid-outbreak</a>                                                                                                                                                                                                                                                                                                                   |
| School closure | 2020-03-16 | 0.50 | South Dakota   | <a href="https://www.nd.gov/dpi/executive-orders-education">https://www.nd.gov/dpi/executive-orders-education</a>                                                                                                                                                                                                                                                                                                                                                                                                       |
| School closure | 2020-03-16 | 0.50 | Tennessee      | <a href="https://www.tn.gov/governor/news/2020/3/16/governor-lee-issues-statement-regarding-statewide-school-closure.html">https://www.tn.gov/governor/news/2020/3/16/governor-lee-issues-statement-regarding-statewide-school-closure.html</a>                                                                                                                                                                                                                                                                         |
| School closure | 2020-03-16 | 0.50 | Utah           | <a href="https://www.schools.utah.gov/File/b27ab22a-d14f-4e12-b247-f95becea39d3">https://www.schools.utah.gov/File/b27ab22a-d14f-4e12-b247-f95becea39d3</a>                                                                                                                                                                                                                                                                                                                                                             |
| School closure | 2020-03-16 | 0.50 | Virginia       | <a href="https://www.governor.virginia.gov/newsroom/all-releases/2020/march/headline-854442-en.html">https://www.governor.virginia.gov/newsroom/all-releases/2020/march/headline-854442-en.html</a>                                                                                                                                                                                                                                                                                                                     |

|                |            |      |                      |                                                                                                                                                                                                                                                                                                                                       |
|----------------|------------|------|----------------------|---------------------------------------------------------------------------------------------------------------------------------------------------------------------------------------------------------------------------------------------------------------------------------------------------------------------------------------|
| School closure | 2020-03-16 | 0.50 | Michigan             | <a href="https://www.michigan.gov/whitmer/0,9309,7-387-90499_90705-521890--,00.html">https://www.michigan.gov/whitmer/0,9309,7-387-90499_90705-521890--,00.html</a>                                                                                                                                                                   |
| School closure | 2020-03-16 | 0.50 | Maryland             | <a href="https://fox8.com/news/list-states-that-have-closed-all-schools-due-to-coronavirus/">https://fox8.com/news/list-states-that-have-closed-all-schools-due-to-coronavirus/</a>                                                                                                                                                   |
| School closure | 2020-03-16 | 0.50 | Wyoming              | <a href="https://www.ktvq.com/wyoming-governor-directs-schools-to-close">https://www.ktvq.com/wyoming-governor-directs-schools-to-close</a>                                                                                                                                                                                           |
| School closure | 2020-03-16 | 0.50 | Louisiana            | <a href="https://www.fox61.com/article/news/health/coronavirus/connecticut-coronavirus-updates-march-12/520-ddf cc84c-1521-4354-907b-d53e2642bee9">https://www.fox61.com/article/news/health/coronavirus/connecticut-coronavirus-updates-march-12/520-ddf cc84c-1521-4354-907b-d53e2642bee9</a>                                       |
| School closure | 2020-03-16 | 0.50 | Alaska               | <a href="https://www.aljazeera.com/news/2020/03/emergencies-closures-states-handling-coronavirus-200317213356419.html">https://www.aljazeera.com/news/2020/03/emergencies-closures-states-handling-coronavirus-200317213356419.html</a>                                                                                               |
| School closure | 2020-03-16 | 0.50 | Arizona              | <a href="https://www.azed.gov/finance/2020/03/16/school-closures-from-march-16-2020-through-march-27-2020/">https://www.azed.gov/finance/2020/03/16/school-closures-from-march-16-2020-through-march-27-2020/</a>                                                                                                                     |
| School closure | 2020-03-16 | 0.50 | Kentucky             | <a href="https://governor.ky.gov/covid19">https://governor.ky.gov/covid19</a>                                                                                                                                                                                                                                                         |
| School closure | 2020-03-16 | 0.50 | Delaware             | <a href="https://www.abc27.com/news/list-states-that-have-closed-all-schools-due-to-coronavirus/">https://www.abc27.com/news/list-states-that-have-closed-all-schools-due-to-coronavirus/</a>                                                                                                                                         |
| School closure | 2020-03-16 | 0.50 | Illinois             | <a href="https://www.chicagotribune.com/coronavirus/ct-cb-coronavirus-illinois-schools-closed-cps-parents-need-to-know-20200317-zrcim5pcfcgnerkboyx7esg5y-story.html">https://www.chicagotribune.com/coronavirus/ct-cb-coronavirus-illinois-schools-closed-cps-parents-need-to-know-20200317-zrcim5pcfcgnerkboyx7esg5y-story.html</a> |
| School closure | 2020-03-16 | 0.50 | District of Columbia | <a href="https://dcps.dc.gov/coronavirus">https://dcps.dc.gov/coronavirus</a>                                                                                                                                                                                                                                                         |
| School closure | 2020-03-16 | 0.50 | Hawaii               | <a href="https://www.aljazeera.com/news/2020/03/emergencies-closures-states-handling-coronavirus-200317213356419.html">https://www.aljazeera.com/news/2020/03/emergencies-closures-states-handling-coronavirus-200317213356419.html</a>                                                                                               |
| School closure | 2020-03-16 | 0.50 | Florida              | <a href="http://www.fidoe.org/newsroom/latest-news/florida-department-of-education-announces-additional-guidance-for-the-2019-20-school-year.stml">http://www.fidoe.org/newsroom/latest-news/florida-department-of-education-announces-additional-guidance-for-the-2019-20-school-year.stml</a>                                       |

|                |            |      |               |                                                                                                                                                                                                                                                                                                                                                                                                                                                                                                                                                               |
|----------------|------------|------|---------------|---------------------------------------------------------------------------------------------------------------------------------------------------------------------------------------------------------------------------------------------------------------------------------------------------------------------------------------------------------------------------------------------------------------------------------------------------------------------------------------------------------------------------------------------------------------|
| School closure | 2020-03-16 | 0.50 | Maine         | <a href="https://www.pressherald.com/2020/03/14/scarborough-closes-schools-through-at-least-march-20/">https://www.pressherald.com/2020/03/14/scarborough-closes-schools-through-at-least-march-20/</a>                                                                                                                                                                                                                                                                                                                                                       |
| School closure | 2020-03-17 | 0.74 | Massachusetts | <a href="https://fox8.com/news/list-states-that-have-closed-all-schools-due-to-coronavirus/">https://fox8.com/news/list-states-that-have-closed-all-schools-due-to-coronavirus/</a>                                                                                                                                                                                                                                                                                                                                                                           |
| School closure | 2020-03-17 | 0.74 | Arkansas      | <a href="https://www.abc27.com/news/list-states-that-have-closed-all-schools-due-to-coronavirus/">https://www.abc27.com/news/list-states-that-have-closed-all-schools-due-to-coronavirus/</a>                                                                                                                                                                                                                                                                                                                                                                 |
| School closure | 2020-03-17 | 0.74 | California    | <a href="https://www.abc27.com/news/list-states-that-have-closed-all-schools-due-to-coronavirus/">https://www.abc27.com/news/list-states-that-have-closed-all-schools-due-to-coronavirus/</a>                                                                                                                                                                                                                                                                                                                                                                 |
| School closure | 2020-03-17 | 0.74 | Connecticut   | <a href="https://patch.com/connecticut/guilford/coronavirus-ct-gov-closes-all-schools-state-has-now-26-cases">https://patch.com/connecticut/guilford/coronavirus-ct-gov-closes-all-schools-state-has-now-26-cases</a>                                                                                                                                                                                                                                                                                                                                         |
| School closure | 2020-03-17 | 0.74 | Rhode Island  | <a href="https://www.riide.ri.gov/InsideRIDE/AdditionalInformation/Covid19.aspx">https://www.riide.ri.gov/InsideRIDE/AdditionalInformation/Covid19.aspx</a>                                                                                                                                                                                                                                                                                                                                                                                                   |
| School closure | 2020-03-17 | 0.74 | Oregon        | <a href="https://www.oregon.gov/newsroom/Pages/NewsDetail.aspx?newsid=36203">https://www.oregon.gov/newsroom/Pages/NewsDetail.aspx?newsid=36203</a>                                                                                                                                                                                                                                                                                                                                                                                                           |
| School closure | 2020-03-17 | 0.74 | Oklahoma      | <a href="https://sde.ok.gov/newsblog/2020-03-16/emergency-state-board-meeting-expected-close-schools-until-april-6">https://sde.ok.gov/newsblog/2020-03-16/emergency-state-board-meeting-expected-close-schools-until-april-6</a>                                                                                                                                                                                                                                                                                                                             |
| School closure | 2020-03-17 | 0.74 | Missouri      | <a href="https://www.abc27.com/news/list-states-that-have-closed-all-schools-due-to-coronavirus/">https://www.abc27.com/news/list-states-that-have-closed-all-schools-due-to-coronavirus/</a>                                                                                                                                                                                                                                                                                                                                                                 |
| School closure | 2020-03-17 | 0.74 | Ohio          | <a href="https://coronavirus.ohio.gov/wps/wcm/connect/gov/aeadbec1-574d-4a42-9ca4-4487b7a67a4f/Director%27s+Order+-+K-12+Schools+03.14.20.pdf?MOD=AJPERES&amp;CONVERT_TO=url&amp;CACHEID=ROOTWORKSPACE.Z18_M1HGGIKON0J000Q9DDDM3000-aeadbec1-574d-4a42-9ca4-4487b7a67a4f-n5827Z4">https://coronavirus.ohio.gov/wps/wcm/connect/gov/aeadbec1-574d-4a42-9ca4-4487b7a67a4f/Director%27s+Order+-+K-12+Schools+03.14.20.pdf?MOD=AJPERES&amp;CONVERT_TO=url&amp;CACHEID=ROOTWORKSPACE.Z18_M1HGGIKON0J000Q9DDDM3000-aeadbec1-574d-4a42-9ca4-4487b7a67a4f-n5827Z4</a> |
| School closure | 2020-03-18 | 0.86 | Georgia       | <a href="https://www.gpb.org/bllogs/education-matters/2020/03/16/gov-kemp-orders-all-k-12-georgia-schools-close-until-end-of-march">https://www.gpb.org/bllogs/education-matters/2020/03/16/gov-kemp-orders-all-k-12-georgia-schools-close-until-end-of-march</a>                                                                                                                                                                                                                                                                                             |
| School closure | 2020-03-18 | 0.86 | Idaho         | <a href="https://www.idahostatesman.com/news/coronavirus/article241291676.html">https://www.idahostatesman.com/news/coronavirus/article241291676.html</a>                                                                                                                                                                                                                                                                                                                                                                                                     |

|                |             |                         |               |                                                                                                                                                                                                                                                                                                                                     |
|----------------|-------------|-------------------------|---------------|-------------------------------------------------------------------------------------------------------------------------------------------------------------------------------------------------------------------------------------------------------------------------------------------------------------------------------------|
| School closure | 2020-03-18  | 0.86                    | New Jersey    | <a href="https://www.nj.gov/governor/news/news/562020/approved/20200316c.shtml">https://www.nj.gov/governor/news/news/562020/approved/20200316c.shtml</a>                                                                                                                                                                           |
| School closure | 2020-03-18  | 0.86                    | Kansas        | <a href="https://www.washingtonpost.com/education/2020/03/17/kansas-is-first-state-close-schools-rest-school-year-amid-coronavirus-crisis-california-could-be-next/">https://www.washingtonpost.com/education/2020/03/17/kansas-is-first-state-close-schools-rest-school-year-amid-coronavirus-crisis-california-could-be-next/</a> |
| School closure | 2020-03-18  | 0.86                    | Nebraska      | <a href="https://www.education.ne.gov/publichealth/known-school-closures/">https://www.education.ne.gov/publichealth/known-school-closures/</a>                                                                                                                                                                                     |
| School closure | 2020-03-18  | 0.86                    | Vermont       | <a href="https://governor.vermont.gov/press-release/gov-scott-orders-orderly-closure-vermont-prek-12-schools-week">https://governor.vermont.gov/press-release/gov-scott-orders-orderly-closure-vermont-prek-12-schools-week</a>                                                                                                     |
| School closure | 2020-03-18  | 0.86                    | Minnesota     | <a href="https://mn.gov/governor/assets/E0%2020-02%20Final_tcm1055-423084.pdf">https://mn.gov/governor/assets/E0%2020-02%20Final_tcm1055-423084.pdf</a>                                                                                                                                                                             |
| School closure | 2020-03-18  | 0.86                    | Alabama       | <a href="https://www.aljazeera.com/news/2020/03/emergencies-closures-states-handling-coronavirus-200317213356419.html">https://www.aljazeera.com/news/2020/03/emergencies-closures-states-handling-coronavirus-200317213356419.html</a>                                                                                             |
| School closure | 2020-03-19  | 0.97                    | Indiana       | <a href="https://www.abc27.com/news/list-states-that-have-closed-all-schools-due-to-coronavirus/">https://www.abc27.com/news/list-states-that-have-closed-all-schools-due-to-coronavirus/</a>                                                                                                                                       |
| School closure | 2020-03-19  | 0.97                    | Texas         | <a href="https://www.dallasnews.com/news/public-health/2020/03/19/gov-abbott-announces-temporary-statewide-school-restaurant-gym-closures/">https://www.dallasnews.com/news/public-health/2020/03/19/gov-abbott-announces-temporary-statewide-school-restaurant-gym-closures/</a>                                                   |
| School closure | 2020-03-19  | 0.97                    | Mississippi   | <a href="https://www.wlox.com/2020/03/19/gov-tate-reeves-give-update-plans-mississippi-schools/">https://www.wlox.com/2020/03/19/gov-tate-reeves-give-update-plans-mississippi-schools/</a>                                                                                                                                         |
| School closure | 2020-03-23  | 0.99                    | Colorado      | <a href="https://www.denverpost.com/2020/03/11/colorado-schools-closed-coronavirus/">https://www.denverpost.com/2020/03/11/colorado-schools-closed-coronavirus/</a>                                                                                                                                                                 |
| <b>NPI</b>     | <b>Date</b> | <b>Cumulative share</b> | <b>Region</b> | <b>Source</b>                                                                                                                                                                                                                                                                                                                       |

|       |      |            |      |                      |                                                                                                                                                                                                                                                                                                                                                         |
|-------|------|------------|------|----------------------|---------------------------------------------------------------------------------------------------------------------------------------------------------------------------------------------------------------------------------------------------------------------------------------------------------------------------------------------------------|
| Venue | clo- | 2020-03-15 | 0.09 | Pennsylvania         | <a href="https://www.governor.pa.gov/newsroom/wolf-administration-orders-restaurants-and-bars-to-close-dine-in-service-in-mitigation-counties-to-stop-spread-of-covid-19/">https://www.governor.pa.gov/newsroom/wolf-administration-orders-restaurants-and-bars-to-close-dine-in-service-in-mitigation-counties-to-stop-spread-of-covid-19/</a>         |
| Venue | clo- | 2020-03-15 | 0.09 | Puerto Rico          | <a href="https://www.estado.pr.gov/es/ordenes-ejecutivas/">https://www.estado.pr.gov/es/ordenes-ejecutivas/</a>                                                                                                                                                                                                                                         |
| Venue | clo- | 2020-03-15 | 0.09 | District of Columbia | <a href="https://www.washingtonian.com/2020/03/16/mayor-closes-dc-bars-and-restaurants-for-dine-in-service/">https://www.washingtonian.com/2020/03/16/mayor-closes-dc-bars-and-restaurants-for-dine-in-service/</a>                                                                                                                                     |
| Venue | clo- | 2020-03-15 | 0.09 | Ohio                 | <a href="https://governor.ohio.gov/wps/portal/gov/governor/media/news-and-media/dewine-orders-ohio-bars-restaurants-to-close">https://governor.ohio.gov/wps/portal/gov/governor/media/news-and-media/dewine-orders-ohio-bars-restaurants-to-close</a>                                                                                                   |
| Venue | clo- | 2020-03-16 | 0.48 | Louisiana            | <a href="https://eu.thenewstar.com/story/news/2020/03/16/louisiana-coronavirus-cases-rise-114-legislature-resume-work/5057909002/">https://eu.thenewstar.com/story/news/2020/03/16/louisiana-coronavirus-cases-rise-114-legislature-resume-work/5057909002/</a>                                                                                         |
| Venue | clo- | 2020-03-16 | 0.48 | New York             | <a href="https://www.politico.com/states/new-york/albany/story/2020/03/16/new-york-new-jersey-connecticut-closing-bars-restaurants-indefinitely-starting-monday-night-1267159">https://www.politico.com/states/new-york/albany/story/2020/03/16/new-york-new-jersey-connecticut-closing-bars-restaurants-indefinitely-starting-monday-night-1267159</a> |
| Venue | clo- | 2020-03-16 | 0.48 | New Jersey           | <a href="https://www.nj.gov/governor/news/news/562020/approved/20200316a.shtml">https://www.nj.gov/governor/news/news/562020/approved/20200316a.shtml</a>                                                                                                                                                                                               |
| Venue | clo- | 2020-03-16 | 0.48 | New Hampshire        | <a href="https://www.governor.nh.gov/news-media/press-2020/20200316-covid-10-businesses.htm">https://www.governor.nh.gov/news-media/press-2020/20200316-covid-10-businesses.htm</a>                                                                                                                                                                     |
| Venue | clo- | 2020-03-16 | 0.48 | Michigan             | <a href="https://www.usnews.com/news/best-states/michigan/articles/2020-03-16/michigan-governor-closes-restaurants-to-dine-in-customers">https://www.usnews.com/news/best-states/michigan/articles/2020-03-16/michigan-governor-closes-restaurants-to-dine-in-customers</a>                                                                             |
| Venue | clo- | 2020-03-16 | 0.48 | Maryland             | <a href="https://governor.maryland.gov/2020/03/19/governor-hogan-announces-further-actions-to-slow-the-spread-of-covid-19-relaunches-maryland-unites-initiative/">https://governor.maryland.gov/2020/03/19/governor-hogan-announces-further-actions-to-slow-the-spread-of-covid-19-relaunches-maryland-unites-initiative/</a>                           |
| Venue | clo- | 2020-03-16 | 0.48 | Kentucky             | <a href="https://governor.ky.gov/covid19">https://governor.ky.gov/covid19</a>                                                                                                                                                                                                                                                                           |

|       |      |            |      |                |                                                                                                                                                                                                                                                                                                                                                                                                             |
|-------|------|------------|------|----------------|-------------------------------------------------------------------------------------------------------------------------------------------------------------------------------------------------------------------------------------------------------------------------------------------------------------------------------------------------------------------------------------------------------------|
| Venue | clo- | 2020-03-16 | 0.48 | Indiana        | <a href="https://www.wndu.com/content/news/Indiana-governor-closes-restaurants-bars-to-dine-in-customers-568830011.html">https://www.wndu.com/content/news/Indiana-governor-closes-restaurants-bars-to-dine-in-customers-568830011.html</a>                                                                                                                                                                 |
| sure  |      |            |      |                |                                                                                                                                                                                                                                                                                                                                                                                                             |
| Venue | clo- | 2020-03-16 | 0.48 | Illinois       | <a href="https://time.com/5803539/united-states-coronavirus-bars-restaurants/">https://time.com/5803539/united-states-coronavirus-bars-restaurants/</a>                                                                                                                                                                                                                                                     |
| sure  |      |            |      |                |                                                                                                                                                                                                                                                                                                                                                                                                             |
| Venue | clo- | 2020-03-16 | 0.48 | Oregon         | <a href="https://www.oregon.gov/newsroom/Pages/NewsDetail.aspx?newsid=36192">https://www.oregon.gov/newsroom/Pages/NewsDetail.aspx?newsid=36192</a>                                                                                                                                                                                                                                                         |
| sure  |      |            |      |                |                                                                                                                                                                                                                                                                                                                                                                                                             |
| Venue | clo- | 2020-03-16 | 0.48 | Rhode Island   | <a href="https://www.ri.gov/press/view/37924">https://www.ri.gov/press/view/37924</a>                                                                                                                                                                                                                                                                                                                       |
| sure  |      |            |      |                |                                                                                                                                                                                                                                                                                                                                                                                                             |
| Venue | clo- | 2020-03-16 | 0.48 | Washington     | <a href="https://www.governor.wa.gov/news-media/inslee-announces-statewide-shutdown-restaurants-bars-and-expanded-social-gathering-limits">https://www.governor.wa.gov/news-media/inslee-announces-statewide-shutdown-restaurants-bars-and-expanded-social-gathering-limits</a>                                                                                                                             |
| sure  |      |            |      |                |                                                                                                                                                                                                                                                                                                                                                                                                             |
| Venue | clo- | 2020-03-16 | 0.48 | California     | <a href="https://www.latimes.com/business/story/2020-03-15/coronavirus-close-los-angeles-restaurants">https://www.latimes.com/business/story/2020-03-15/coronavirus-close-los-angeles-restaurants</a>                                                                                                                                                                                                       |
| sure  |      |            |      |                |                                                                                                                                                                                                                                                                                                                                                                                                             |
| Venue | clo- | 2020-03-16 | 0.48 | Delaware       | <a href="https://coronavirus.delaware.gov/wp-content/uploads/sites/177/2020/03/coronavirus_govdec_rest_bars-1.pdf">https://coronavirus.delaware.gov/wp-content/uploads/sites/177/2020/03/coronavirus_govdec_rest_bars-1.pdf</a>                                                                                                                                                                             |
| sure  |      |            |      |                |                                                                                                                                                                                                                                                                                                                                                                                                             |
| Venue | clo- | 2020-03-16 | 0.48 | Connecticut    | <a href="https://www.courant.com/news/connecticut/hc-news-coronavirus-update-0316-20200316-ukhf6fmh5cvtaob3yiavz5q-story.html">https://www.courant.com/news/connecticut/hc-news-coronavirus-update-0316-20200316-ukhf6fmh5cvtaob3yiavz5q-story.html</a>                                                                                                                                                     |
| sure  |      |            |      |                |                                                                                                                                                                                                                                                                                                                                                                                                             |
| Venue | clo- | 2020-03-17 | 0.69 | Wisconsin      | <a href="https://madison.com/ct/news/local/govt-and-politics/gov-tony-evers-orders-bars-restaurants-to-be-closed-across-wisconsin-for-in-house-dining/article_40abef70-b51e-5756-962f-801f0387eed6.html">https://madison.com/ct/news/local/govt-and-politics/gov-tony-evers-orders-bars-restaurants-to-be-closed-across-wisconsin-for-in-house-dining/article_40abef70-b51e-5756-962f-801f0387eed6.html</a> |
| sure  |      |            |      |                |                                                                                                                                                                                                                                                                                                                                                                                                             |
| Venue | clo- | 2020-03-17 | 0.69 | North Carolina | <a href="https://www.newsobserver.com/news/coronavirus/article241245211.html">https://www.newsobserver.com/news/coronavirus/article241245211.html</a>                                                                                                                                                                                                                                                       |
| sure  |      |            |      |                |                                                                                                                                                                                                                                                                                                                                                                                                             |
| Venue | clo- | 2020-03-17 | 0.69 | Nevada         | <a href="https://nvhealthresponse.nv.gov/wp-content/uploads/2020/03/NV-Health-Reponse-COVID19-Risk-Management-Initiative.pdf">https://nvhealthresponse.nv.gov/wp-content/uploads/2020/03/NV-Health-Reponse-COVID19-Risk-Management-Initiative.pdf</a>                                                                                                                                                       |
| sure  |      |            |      |                |                                                                                                                                                                                                                                                                                                                                                                                                             |
| Venue | clo- | 2020-03-17 | 0.69 | Colorado       | <a href="https://www.eater.com/2020/3/15/21180761/coronavirus-restaurants-bars-closed-new-york-la-chicago">https://www.eater.com/2020/3/15/21180761/coronavirus-restaurants-bars-closed-new-york-la-chicago</a>                                                                                                                                                                                             |
| sure  |      |            |      |                |                                                                                                                                                                                                                                                                                                                                                                                                             |

|       |      |            |      |                |                                                                                                                                                                                                                                                                                                                         |
|-------|------|------------|------|----------------|-------------------------------------------------------------------------------------------------------------------------------------------------------------------------------------------------------------------------------------------------------------------------------------------------------------------------|
| Venue | clo- | 2020-03-17 | 0.69 | Vermont        | <a href="https://governor.vermont.gov/press-release/governor-phil-scott-announces-new-guidance-covid-19-community-mitigation-measures">https://governor.vermont.gov/press-release/governor-phil-scott-announces-new-guidance-covid-19-community-mitigation-measures</a>                                                 |
| sure  |      |            |      |                |                                                                                                                                                                                                                                                                                                                         |
| Venue | clo- | 2020-03-17 | 0.69 | Massachusetts  | <a href="https://www.mass.gov/news/baker-polito-administration-announces-emergency-actions-to-address-covid-19">https://www.mass.gov/news/baker-polito-administration-announces-emergency-actions-to-address-covid-19</a>                                                                                               |
| sure  |      |            |      |                |                                                                                                                                                                                                                                                                                                                         |
| Venue | clo- | 2020-03-17 | 0.69 | Minnesota      | <a href="https://www.eater.com/2020/3/15/21180761/coronavirus-restaurants-bars-closed-new-york-la-chicago">https://www.eater.com/2020/3/15/21180761/coronavirus-restaurants-bars-closed-new-york-la-chicago</a>                                                                                                         |
| sure  |      |            |      |                |                                                                                                                                                                                                                                                                                                                         |
| Venue | clo- | 2020-03-17 | 0.69 | South Carolina | <a href="https://governor.sc.gov/sites/default/files/Documents/Executive-Orders/">https://governor.sc.gov/sites/default/files/Documents/Executive-Orders/</a>                                                                                                                                                           |
| sure  |      |            |      |                |                                                                                                                                                                                                                                                                                                                         |
| Venue | clo- | 2020-03-17 | 0.69 | Florida        | <a href="https://www.eater.com/2020/3/15/21180761/coronavirus-restaurants-bars-closed-new-york-la-chicago">https://www.eater.com/2020/3/15/21180761/coronavirus-restaurants-bars-closed-new-york-la-chicago</a>                                                                                                         |
| sure  |      |            |      |                |                                                                                                                                                                                                                                                                                                                         |
| Venue | clo- | 2020-03-17 | 0.69 | Iowa           | <a href="https://governor.iowa.gov/press-release/gov-reynolds-issues-a-state-of-public-health-disaster-emergency">https://governor.iowa.gov/press-release/gov-reynolds-issues-a-state-of-public-health-disaster-emergency</a>                                                                                           |
| sure  |      |            |      |                |                                                                                                                                                                                                                                                                                                                         |
| Venue | clo- | 2020-03-18 | 0.71 | Maine          | <a href="https://www.maine.gov/governor/mills/news/governor-mills-takes-further-steps-respond-covid-19-protect-health-and-safety-maine-people">https://www.maine.gov/governor/mills/news/governor-mills-takes-further-steps-respond-covid-19-protect-health-and-safety-maine-people</a>                                 |
| sure  |      |            |      |                |                                                                                                                                                                                                                                                                                                                         |
| Venue | clo- | 2020-03-18 | 0.71 | Utah           | <a href="https://governor.utah.gov/2020/03/18/state-orders-restaurants-bars-to-suspend-dine-in-services-to-slow-spread-of-covid-19/">https://governor.utah.gov/2020/03/18/state-orders-restaurants-bars-to-suspend-dine-in-services-to-slow-spread-of-covid-19/</a>                                                     |
| sure  |      |            |      |                |                                                                                                                                                                                                                                                                                                                         |
| Venue | clo- | 2020-03-18 | 0.71 | West Virginia  | <a href="https://governor.wv.gov/News/press-releases/2020/Pages/COVID-19-UPDATE-Executive-Order-limiting-restaurants-and-bars,-closing-casinos-statewide.aspx">https://governor.wv.gov/News/press-releases/2020/Pages/COVID-19-UPDATE-Executive-Order-limiting-restaurants-and-bars,-closing-casinos-statewide.aspx</a> |
| sure  |      |            |      |                |                                                                                                                                                                                                                                                                                                                         |
| Venue | clo- | 2020-03-19 | 0.83 | Nebraska       | <a href="https://www.3newsnow.com/news/coronavirus/directed-health-measures-released-by-governor-ricketts-office">https://www.3newsnow.com/news/coronavirus/directed-health-measures-released-by-governor-ricketts-office</a>                                                                                           |
| sure  |      |            |      |                |                                                                                                                                                                                                                                                                                                                         |
| Venue | clo- | 2020-03-19 | 0.83 | New Mexico     | <a href="https://www.governor.state.nm.us/2020/03/18/new-mexico-to-order-additional-closures-to-limit-spread-of-covid-19/">https://www.governor.state.nm.us/2020/03/18/new-mexico-to-order-additional-closures-to-limit-spread-of-covid-19/</a>                                                                         |
| sure  |      |            |      |                |                                                                                                                                                                                                                                                                                                                         |
| Venue | clo- | 2020-03-19 | 0.83 | Arizona        | <a href="https://azgovernor.gov/governor/news/2020/03/governor-ducey-announces-latest-covid-19-actions">https://azgovernor.gov/governor/news/2020/03/governor-ducey-announces-latest-covid-19-actions</a>                                                                                                               |
| sure  |      |            |      |                |                                                                                                                                                                                                                                                                                                                         |

|       |      |            |      |              |                                                                                                                                                                                                                                                                                                                                                                                                         |
|-------|------|------------|------|--------------|---------------------------------------------------------------------------------------------------------------------------------------------------------------------------------------------------------------------------------------------------------------------------------------------------------------------------------------------------------------------------------------------------------|
| Venue | clo- | 2020-03-19 | 0.83 | Texas        | <a href="https://www.dallasnews.com/news/public-health/2020/03/19/gov-abbott-announces-temporary-statewide-school-restaurant-gym-closures/">https://www.dallasnews.com/news/public-health/2020/03/19/gov-abbott-announces-temporary-statewide-school-restaurant-gym-closures/</a>                                                                                                                       |
| sure  |      |            |      |              |                                                                                                                                                                                                                                                                                                                                                                                                         |
| Venue | clo- | 2020-03-19 | 0.83 | Hawaii       | <a href="https://www.hawaiinewsnow.com/2020/03/19/city-orders-restaurants-bars-night-clubs-close-dine-in-services-days/">https://www.hawaiinewsnow.com/2020/03/19/city-orders-restaurants-bars-night-clubs-close-dine-in-services-days/</a>                                                                                                                                                             |
| sure  |      |            |      |              |                                                                                                                                                                                                                                                                                                                                                                                                         |
| Venue | clo- | 2020-03-20 | 0.85 | Wyoming      | <a href="https://health.wyo.gov/governor-and-state-health-officer-issue-public-spaces-closure-order/">https://health.wyo.gov/governor-and-state-health-officer-issue-public-spaces-closure-order/</a>                                                                                                                                                                                                   |
| sure  |      |            |      |              |                                                                                                                                                                                                                                                                                                                                                                                                         |
| Venue | clo- | 2020-03-20 | 0.85 | North Dakota | <a href="https://www.governor.nd.gov/news/burgum-orders-bars-restaurants-closed-site-patrons-provides-additional-guidance-k-12-schools">https://www.governor.nd.gov/news/burgum-orders-bars-restaurants-closed-site-patrons-provides-additional-guidance-k-12-schools</a>                                                                                                                               |
| sure  |      |            |      |              |                                                                                                                                                                                                                                                                                                                                                                                                         |
| Venue | clo- | 2020-03-20 | 0.85 | Montana      | <a href="https://news.mt.gov/governor-bullock-announces-closure-of-dine-in-food-service-and-alcoholic-beverage-businesses-and-other-activities-that-pose-enhanced-risks-to-curtail-spread-of-covid-19">https://news.mt.gov/governor-bullock-announces-closure-of-dine-in-food-service-and-alcoholic-beverage-businesses-and-other-activities-that-pose-enhanced-risks-to-curtail-spread-of-covid-19</a> |
| sure  |      |            |      |              |                                                                                                                                                                                                                                                                                                                                                                                                         |
| Venue | clo- | 2020-03-20 | 0.85 | Arkansas     | <a href="https://www.nwaonline.com/news/2020/mar/20/governor-orders-gyms-restaurants-bars-c/">https://www.nwaonline.com/news/2020/mar/20/governor-orders-gyms-restaurants-bars-c/</a>                                                                                                                                                                                                                   |
| sure  |      |            |      |              |                                                                                                                                                                                                                                                                                                                                                                                                         |
| Venue | clo- | 2020-03-20 | 0.85 | South Dakota | <a href="https://www.governor.nd.gov/news/burgum-orders-bars-restaurants-closed-site-patrons-provides-additional-guidance-k-12-schools">https://www.governor.nd.gov/news/burgum-orders-bars-restaurants-closed-site-patrons-provides-additional-guidance-k-12-schools</a>                                                                                                                               |
| sure  |      |            |      |              |                                                                                                                                                                                                                                                                                                                                                                                                         |
| Venue | clo- | 2020-03-23 | 0.89 | Tennessee    | <a href="https://www.tn.gov/governor/news/2020/3/22/gov-bill-lee-signs-executive-order-mandating-alternative-business-models-for-restaurants-and-gyms--lifts-alcohol-regulations.html">https://www.tn.gov/governor/news/2020/3/22/gov-bill-lee-signs-executive-order-mandating-alternative-business-models-for-restaurants-and-gyms--lifts-alcohol-regulations.html</a>                                 |
| sure  |      |            |      |              |                                                                                                                                                                                                                                                                                                                                                                                                         |
| Venue | clo- | 2020-03-23 | 0.89 | Missouri     | <a href="https://governor.mo.gov/press-releases/archive/governor-parson-signs-executive-order-20-05-allowing-sale-unprepared-foods">https://governor.mo.gov/press-releases/archive/governor-parson-signs-executive-order-20-05-allowing-sale-unprepared-foods</a>                                                                                                                                       |
| sure  |      |            |      |              |                                                                                                                                                                                                                                                                                                                                                                                                         |
| Venue | clo- | 2020-03-24 | 0.96 | Mississippi  | <a href="https://www.jacksonfreepress.com/documents/2020/mar/24/mississippi-covid-19-response/">https://www.jacksonfreepress.com/documents/2020/mar/24/mississippi-covid-19-response/</a>                                                                                                                                                                                                               |
| sure  |      |            |      |              |                                                                                                                                                                                                                                                                                                                                                                                                         |
| Venue | clo- | 2020-03-24 | 0.96 | Virginia     | <a href="https://www.governor.virginia.gov/newsroom/all-releases/2020/march/headline-855292-en.html">https://www.governor.virginia.gov/newsroom/all-releases/2020/march/headline-855292-en.html</a>                                                                                                                                                                                                     |
| sure  |      |            |      |              |                                                                                                                                                                                                                                                                                                                                                                                                         |
| Venue | clo- | 2020-03-24 | 0.96 | Georgia      | <a href="https://www.usnews.com/news/best-states/georgia/articles/2020-03-23/counties-in-georgia-enact-restrictions-as-virus-spreads">https://www.usnews.com/news/best-states/georgia/articles/2020-03-23/counties-in-georgia-enact-restrictions-as-virus-spreads</a>                                                                                                                                   |
| sure  |      |            |      |              |                                                                                                                                                                                                                                                                                                                                                                                                         |



|       |      |            |      |          |                                                                                                                                                                                                                                                                       |
|-------|------|------------|------|----------|-----------------------------------------------------------------------------------------------------------------------------------------------------------------------------------------------------------------------------------------------------------------------|
| Venue | clo- | 2020-03-24 | 0.96 | Alaska   | <a href="https://gov.alaska.gov/wp-content/uploads/sites/2/03232020-SOA-COVID-19-Health-Mandate-009.pdf">https://gov.alaska.gov/wp-content/uploads/sites/2/03232020-SOA-COVID-19-Health-Mandate-009.pdf</a>                                                           |
| Venue | clo- | 2020-03-25 | 0.98 | Idaho    | <a href="https://coronavirus.idaho.gov/essential-services/sure">https://coronavirus.idaho.gov/essential-services/sure</a>                                                                                                                                             |
| Venue | clo- | 2020-03-25 | 0.98 | Oklahoma | <a href="https://kfor.com/news/local/gov-stitt-orders-all-non-essential-businesses-to-close-in-counties-affected-by-covid-19/">https://kfor.com/news/local/gov-stitt-orders-all-non-essential-businesses-to-close-in-counties-affected-by-covid-19/</a>               |
| Venue | clo- | 2020-03-27 | 0.99 | Alabama  | <a href="https://governor.alabama.gov/assets/2020/03/Amended-Statewide-Social-Distancing-SHO-Order-3.27.2020-FINAL.pdf">https://governor.alabama.gov/assets/2020/03/Amended-Statewide-Social-Distancing-SHO-Order-3.27.2020-FINAL.pdf</a>                             |
| Venue | clo- | 2020-03-30 | 1.00 | Kansas   | <a href="https://governor.kansas.gov/governor-kelly-issues-temporary-statewide-stay-home-order-in-ongoing-effort-to-combat-covid-19/">https://governor.kansas.gov/governor-kelly-issues-temporary-statewide-stay-home-order-in-ongoing-effort-to-combat-covid-19/</a> |

| <b>NPI</b> | <b>Date</b> | <b>Cumulative Region share</b> | <b>Source</b>                                                                                                                                                                                                                                                                                                                                                                   |
|------------|-------------|--------------------------------|---------------------------------------------------------------------------------------------------------------------------------------------------------------------------------------------------------------------------------------------------------------------------------------------------------------------------------------------------------------------------------|
| Lockdown   | 2020-03-15  | 0.01                           | <a href="https://www.estado.pr.gov/es/ordenes-ejecutivas/">https://www.estado.pr.gov/es/ordenes-ejecutivas/</a>                                                                                                                                                                                                                                                                 |
| Lockdown   | 2020-03-19  | 0.13                           | <a href="https://www.gov.ca.gov/2020/03/19/governor-gavin-newsom-issues-stay-at-home-order/">https://www.gov.ca.gov/2020/03/19/governor-gavin-newsom-issues-stay-at-home-order/</a>                                                                                                                                                                                             |
| Lockdown   | 2020-03-21  | 0.19                           | <a href="https://www.nj.gov/governor/news/news/562020/approved/20200320j.shtml">https://www.nj.gov/governor/news/news/562020/approved/20200320j.shtml</a>                                                                                                                                                                                                                       |
| Lockdown   | 2020-03-21  | 0.19                           | <a href="https://www2.illinois.gov/Pages/news-item.aspx?ReleaseID=21288">https://www2.illinois.gov/Pages/news-item.aspx?ReleaseID=21288</a>                                                                                                                                                                                                                                     |
| Lockdown   | 2020-03-22  | 0.25                           | <a href="https://patch.com/new-york/new-york-city/new-yorks-stay-home-order-goes-effect">https://patch.com/new-york/new-york-city/new-yorks-stay-home-order-goes-effect</a>                                                                                                                                                                                                     |
| Lockdown   | 2020-03-23  | 0.35                           | <a href="https://www.oregon.gov/newsroom/Pages/NewsDetail.aspx?newsid=36240">https://www.oregon.gov/newsroom/Pages/NewsDetail.aspx?newsid=36240</a>                                                                                                                                                                                                                             |
| Lockdown   | 2020-03-23  | 0.35                           | <a href="https://coronavirus.ohio.gov/static/DirectorsOrderStayAtHome.pdf">https://coronavirus.ohio.gov/static/DirectorsOrderStayAtHome.pdf</a>                                                                                                                                                                                                                                 |
| Lockdown   | 2020-03-23  | 0.35                           | <a href="https://portal.ct.gov/Office-of-the-Governor/News/Press-Releases/2020/03-2020-Governor-Lamont-Releases-Guidance-to-Businesses-on-Order-Asking-Connecticut-to-Stay-Safe-Stay-Home">https://portal.ct.gov/Office-of-the-Governor/News/Press-Releases/2020/03-2020-Governor-Lamont-Releases-Guidance-to-Businesses-on-Order-Asking-Connecticut-to-Stay-Safe-Stay-Home</a> |
| Lockdown   | 2020-03-23  | 0.35                           | <a href="https://www.governor.state.nm.us/2020/03/23/state-enacts-further-restrictions-to-stop-spread-including-stay-at-home-instruction/">https://www.governor.state.nm.us/2020/03/23/state-enacts-further-restrictions-to-stop-spread-including-stay-at-home-instruction/</a>                                                                                                 |

|          |            |      |               |                                                                                                                                                                                                                                                                                                                                                                     |
|----------|------------|------|---------------|---------------------------------------------------------------------------------------------------------------------------------------------------------------------------------------------------------------------------------------------------------------------------------------------------------------------------------------------------------------------|
| Lockdown | 2020-03-23 | 0.35 | Washington    | <a href="https://www.governor.wa.gov/news-media/insee-announces-stay-home-stay-healthy%2%A0order">https://www.governor.wa.gov/news-media/insee-announces-stay-home-stay-healthy%2%A0order</a>                                                                                                                                                                       |
| Lockdown | 2020-03-23 | 0.35 | Louisiana     | <a href="https://gov.louisiana.gov/assets/Proclamations/2020/JBE-33-2020.pdf">https://gov.louisiana.gov/assets/Proclamations/2020/JBE-33-2020.pdf</a>                                                                                                                                                                                                               |
| Lockdown | 2020-03-24 | 0.42 | Michigan      | <a href="https://www.michigan.gov/coronavirus/0,9753,7-406-98178_98455-521682--,00.html">https://www.michigan.gov/coronavirus/0,9753,7-406-98178_98455-521682--,00.html</a>                                                                                                                                                                                         |
| Lockdown | 2020-03-24 | 0.42 | West Virginia | <a href="https://governor.wv.gov/News/press-releases/2020/Pages/COVID-19-UPDATE-Gov.-Justice-issues-Stay-at-Home-order-for-all-West-Virginians.aspx">https://governor.wv.gov/News/press-releases/2020/Pages/COVID-19-UPDATE-Gov.-Justice-issues-Stay-at-Home-order-for-all-West-Virginians.aspx</a>                                                                 |
| Lockdown | 2020-03-24 | 0.42 | Massachusetts | <a href="https://www.mass.gov/news/dph-public-health-advisory-stay-at-home-advisory">https://www.mass.gov/news/dph-public-health-advisory-stay-at-home-advisory</a>                                                                                                                                                                                                 |
| Lockdown | 2020-03-24 | 0.42 | Vermont       | <a href="https://governor.vermont.gov/sites/scott/files/documents/ADDENDUM%20%20TO%20EXECUTIVE%20ORDER%2001-20.pdf">https://governor.vermont.gov/sites/scott/files/documents/ADDENDUM%20%20TO%20EXECUTIVE%20ORDER%2001-20.pdf</a>                                                                                                                                   |
| Lockdown | 2020-03-24 | 0.42 | Delaware      | <a href="https://governor.delaware.gov/wp-content/uploads/sites/24/2020/03/Fifth-Modification-to-State-of-Emergency-03222020.pdf">https://governor.delaware.gov/wp-content/uploads/sites/24/2020/03/Fifth-Modification-to-State-of-Emergency-03222020.pdf</a>                                                                                                       |
| Lockdown | 2020-03-25 | 0.46 | Indiana       | <a href="https://www.in.gov/gov/3232.htm">https://www.in.gov/gov/3232.htm</a>                                                                                                                                                                                                                                                                                       |
| Lockdown | 2020-03-25 | 0.46 | Hawaii        | <a href="https://governor.hawaii.gov/newsroom/latest-news/office-of-the-governor-news-release-governor-ige-issues-statewide-order-to-stay-at-home-work-from-home-to-fight-covid-19/">https://governor.hawaii.gov/newsroom/latest-news/office-of-the-governor-news-release-governor-ige-issues-statewide-order-to-stay-at-home-work-from-home-to-fight-covid-19/</a> |
| Lockdown | 2020-03-25 | 0.46 | Wisconsin     | <a href="https://content.govdelivery.com/accounts/WIGOV/bulletins/282deef">https://content.govdelivery.com/accounts/WIGOV/bulletins/282deef</a>                                                                                                                                                                                                                     |
| Lockdown | 2020-03-25 | 0.46 | Idaho         | <a href="https://www.idahostatesman.com/news/coronavirus/article241479406.html">https://www.idahostatesman.com/news/coronavirus/article241479406.html</a>                                                                                                                                                                                                           |
| Lockdown | 2020-03-26 | 0.48 | New Hampshire | <a href="https://www.governor.nh.gov/news-media/emergency-orders/documents/emergency-order-17-1.pdf">https://www.governor.nh.gov/news-media/emergency-orders/documents/emergency-order-17-1.pdf</a>                                                                                                                                                                 |
| Lockdown | 2020-03-26 | 0.48 | Colorado      | <a href="https://bloximages.newyork1.vip.townnews.com/coloradopolitics.com/content/tncms/assets/v3/editorial/1/5c/15c0d646-6efd-11ea-9f44-936924cd21a7/5e7bfea00dc56.pdf.pdf">https://bloximages.newyork1.vip.townnews.com/coloradopolitics.com/content/tncms/assets/v3/editorial/1/5c/15c0d646-6efd-11ea-9f44-936924cd21a7/5e7bfea00dc56.pdf.pdf</a>               |
| Lockdown | 2020-03-27 | 0.51 | Utah          | <a href="https://coronavirus.utah.gov/full-text-governors-stay-home-stay-safe-directive/">https://coronavirus.utah.gov/full-text-governors-stay-home-stay-safe-directive/</a>                                                                                                                                                                                       |

|          |            |      |                      |                                                                                                                                                                                                                                                                                                                                             |
|----------|------------|------|----------------------|---------------------------------------------------------------------------------------------------------------------------------------------------------------------------------------------------------------------------------------------------------------------------------------------------------------------------------------------|
| Lockdown | 2020-03-27 | 0.51 | Minnesota            | <a href="https://mn.gov/governor/assets/3a.%20E0%2020-20%20FINAL%20SIGNED%20Filed_tcm1055-425020.pdf">https://mn.gov/governor/assets/3a.%20E0%2020-20%20FINAL%20SIGNED%20Filed_tcm1055-425020.pdf</a>                                                                                                                                       |
| Lockdown | 2020-03-28 | 0.52 | Rhode Island         | <a href="http://www.governor.ri.gov/documents/orders/Executive-Order-20-13.pdf">http://www.governor.ri.gov/documents/orders/Executive-Order-20-13.pdf</a>                                                                                                                                                                                   |
| Lockdown | 2020-03-28 | 0.52 | Montana              | <a href="https://news.mt.gov/governor-bullock-issues-stay-at-home-directive-to-slow-the-spread-of-covid-19">https://news.mt.gov/governor-bullock-issues-stay-at-home-directive-to-slow-the-spread-of-covid-19</a>                                                                                                                           |
| Lockdown | 2020-03-28 | 0.52 | Alaska               | <a href="https://gov.alaska.gov/home/covid19-healthmandates/">https://gov.alaska.gov/home/covid19-healthmandates/</a>                                                                                                                                                                                                                       |
| Lockdown | 2020-03-30 | 0.61 | Virginia             | <a href="https://www.governor.virginia.gov/newsroom/all-releases/2020/march/headline-855702-en.html">https://www.governor.virginia.gov/newsroom/all-releases/2020/march/headline-855702-en.html</a>                                                                                                                                         |
| Lockdown | 2020-03-30 | 0.61 | North Carolina       | <a href="https://files.nc.gov/governor/documents/files/E0121-Stay-at-Home-Order-3.pdf">https://files.nc.gov/governor/documents/files/E0121-Stay-at-Home-Order-3.pdf</a>                                                                                                                                                                     |
| Lockdown | 2020-03-30 | 0.61 | Kansas               | <a href="https://governor.kansas.gov/wp-content/uploads/2020/03/E020-16.pdf">https://governor.kansas.gov/wp-content/uploads/2020/03/E020-16.pdf</a>                                                                                                                                                                                         |
| Lockdown | 2020-03-30 | 0.61 | Maryland             | <a href="https://www.youtube.com/watch?v=8TPx6pxBCyM">https://www.youtube.com/watch?v=8TPx6pxBCyM</a>                                                                                                                                                                                                                                       |
| Lockdown | 2020-03-30 | 0.61 | District of Columbia | <a href="https://coronavirus.dc.gov/release/mayor-bowser-issues-stay-home-order">https://coronavirus.dc.gov/release/mayor-bowser-issues-stay-home-order</a>                                                                                                                                                                                 |
| Lockdown | 2020-03-31 | 0.63 | Arizona              | <a href="https://azgovernor.gov/governor/news/2020/03/stay-home-stay-healthy-stay-connected">https://azgovernor.gov/governor/news/2020/03/stay-home-stay-healthy-stay-connected</a>                                                                                                                                                         |
| Lockdown | 2020-04-01 | 0.76 | Florida              | <a href="https://eu.floridatoday.com/story/news/2020/04/01/coronavirus-florida-stay-home-order-what-means-explanation-what-essential-non-essential-desantis/5104936002/">https://eu.floridatoday.com/story/news/2020/04/01/coronavirus-florida-stay-home-order-what-means-explanation-what-essential-non-essential-desantis/5104936002/</a> |
| Lockdown | 2020-04-01 | 0.76 | Pennsylvania         | <a href="https://www.nytimes.com/interactive/2020/us/coronavirus-stay-at-home-order.html">https://www.nytimes.com/interactive/2020/us/coronavirus-stay-at-home-order.html</a>                                                                                                                                                               |
| Lockdown | 2020-04-01 | 0.76 | Nevada               | <a href="https://www.fox5vegas.com/coronavirus/nevada-gov-sisolak-issues-stay-at-home-directive-through-april-30/article_6b11e83c-7430-11ea-abe6-0f026facbed.html">https://www.fox5vegas.com/coronavirus/nevada-gov-sisolak-issues-stay-at-home-directive-through-april-30/article_6b11e83c-7430-11ea-abe6-0f026facbed.html</a>             |
| Lockdown | 2020-04-01 | 0.76 | Tennessee            | <a href="https://publications.tnsofiles.com/pub/execorders/exec-orders-lee22.pdf">https://publications.tnsofiles.com/pub/execorders/exec-orders-lee22.pdf</a>                                                                                                                                                                               |
| Lockdown | 2020-04-02 | 0.89 | Georgia              | <a href="https://gov.georgia.gov/document/2020-executive-order/04022001/download">https://gov.georgia.gov/document/2020-executive-order/04022001/download</a>                                                                                                                                                                               |

|          |            |      |                |                                                                                                                                                                                                                         |
|----------|------------|------|----------------|-------------------------------------------------------------------------------------------------------------------------------------------------------------------------------------------------------------------------|
| Lockdown | 2020-04-02 | 0.89 | Texas          | <a href="https://www.nbcnews.com/health/health-news/here-are-stay-home-orders-across-country-n1168736">https://www.nbcnews.com/health/health-news/here-are-stay-home-orders-across-country-n1168736</a>                 |
| Lockdown | 2020-04-02 | 0.89 | Maine          | <a href="https://www.maine.gov/governor/mills/news/governor-mills-issues-stay-healthy-home-mandate-2020-03-31">https://www.maine.gov/governor/mills/news/governor-mills-issues-stay-healthy-home-mandate-2020-03-31</a> |
| Lockdown | 2020-04-03 | 0.89 | Mississippi    | <a href="https://thehill.com/homenews/state-watch/490674-mississippi-governor-issues-stay-at-home-order">https://thehill.com/homenews/state-watch/490674-mississippi-governor-issues-stay-at-home-order</a>             |
| Lockdown | 2020-04-04 | 0.91 | Alabama        | <a href="https://governor.alabama.gov/newsroom/2020/04/governor-ivey-issues-stay-at-home-order/">https://governor.alabama.gov/newsroom/2020/04/governor-ivey-issues-stay-at-home-order/</a>                             |
| Lockdown | 2020-04-06 | 0.93 | Missouri       | <a href="https://governor.mo.gov/priorities/stay-home-order">https://governor.mo.gov/priorities/stay-home-order</a>                                                                                                     |
| Lockdown | 2020-04-07 | 0.94 | South Carolina | <a href="http://abcnews4.com/news/local/gov-mcmaster-orders-stay-at-home-order-for-south-carolina">http://abcnews4.com/news/local/gov-mcmaster-orders-stay-at-home-order-for-south-carolina</a>                         |

| NPI                  | Date       | Cumulative share | Region       | Source                                                                                                                                                                                                                                                                                                                                          |
|----------------------|------------|------------------|--------------|-------------------------------------------------------------------------------------------------------------------------------------------------------------------------------------------------------------------------------------------------------------------------------------------------------------------------------------------------|
| Work-from-home order | 2020-03-15 | 0.01             | Puerto Rico  | <a href="https://www.estado.pr.gov/es/ordenes-ejecutivas/">https://www.estado.pr.gov/es/ordenes-ejecutivas/</a>                                                                                                                                                                                                                                 |
| Work-from-home order | 2020-03-19 | 0.17             | California   | <a href="https://www.gov.ca.gov/2020/03/19/governor-gavin-newsom-issues-stay-at-home-order/">https://www.gov.ca.gov/2020/03/19/governor-gavin-newsom-issues-stay-at-home-order/</a>                                                                                                                                                             |
| Work-from-home order | 2020-03-19 | 0.17             | Pennsylvania | <a href="https://www.governor.pa.gov/newsroom/all-non-life-sustaining-businesses-in-pennsylvania-to-close-physical-locations-as-of-8-pm-today-to-slow-spread-of-covid-19/">https://www.governor.pa.gov/newsroom/all-non-life-sustaining-businesses-in-pennsylvania-to-close-physical-locations-as-of-8-pm-today-to-slow-spread-of-covid-19/</a> |
| Work-from-home order | 2020-03-21 | 0.23             | Illinois     | <a href="https://www.nytimes.com/2020/03/21/world/coronavirus-news.html">https://www.nytimes.com/2020/03/21/world/coronavirus-news.html</a>                                                                                                                                                                                                     |
| Work-from-home order | 2020-03-21 | 0.23             | New Jersey   | <a href="https://www.nj.gov/governor/news/news/562020/approved/20200320j.shtml">https://www.nj.gov/governor/news/news/562020/approved/20200320j.shtml</a>                                                                                                                                                                                       |
| Work-from-home order | 2020-03-22 | 0.29             | New York     | <a href="https://www.governor.ny.gov/news/no-2028-continuing-temporary-suspension-and-modification-laws-relating-disaster-emergency">https://www.governor.ny.gov/news/no-2028-continuing-temporary-suspension-and-modification-laws-relating-disaster-emergency</a>                                                                             |

|                      |            |      |               |                                                                                                                                                                                                                                                                                                                                                                                                       |
|----------------------|------------|------|---------------|-------------------------------------------------------------------------------------------------------------------------------------------------------------------------------------------------------------------------------------------------------------------------------------------------------------------------------------------------------------------------------------------------------|
| Work-from-home order | 2020-03-23 | 0.42 | New Mexico    | <a href="https://www.governor.state.nm.us/2020/03/23/state-enacts-further-restrictions-to-stop-spread-including-stay-at-home-instruction/">https://www.governor.state.nm.us/2020/03/23/state-enacts-further-restrictions-to-stop-spread-including-stay-at-home-instruction/</a>                                                                                                                       |
| Work-from-home order | 2020-03-23 | 0.42 | Washington    | <a href="https://www.governor.wa.gov/news-media/inslee-announces-stay-home-stay-healthy%2%A0order">https://www.governor.wa.gov/news-media/inslee-announces-stay-home-stay-healthy%2%A0order</a>                                                                                                                                                                                                       |
| Work-from-home order | 2020-03-23 | 0.42 | Oregon        | <a href="https://govstatus.egov.com/or-covid-19">https://govstatus.egov.com/or-covid-19</a>                                                                                                                                                                                                                                                                                                           |
| Work-from-home order | 2020-03-23 | 0.42 | Connecticut   | <a href="https://portal.ct.gov/Office-of-the-Governor/News/Press-Releases/2020-03-2020/Governor-Lamont-Signs-Executive-Order-Asking-Connecticut-Businesses-and-Residents-Stay-Safe">https://portal.ct.gov/Office-of-the-Governor/News/Press-Releases/2020-03-2020/Governor-Lamont-Signs-Executive-Order-Asking-Connecticut-Businesses-and-Residents-Stay-Safe</a>                                     |
| Work-from-home order | 2020-03-23 | 0.42 | Massachusetts | <a href="https://www.mass.gov/news/governor-charlie-baker-orders-all-non-essential-businesses-to-cess-in-person-operation">https://www.mass.gov/news/governor-charlie-baker-orders-all-non-essential-businesses-to-cess-in-person-operation</a>                                                                                                                                                       |
| Work-from-home order | 2020-03-23 | 0.42 | Ohio          | <a href="https://coronavirus.ohio.gov/static/DirectorsOrderStayAtHome.pdf">https://coronavirus.ohio.gov/static/DirectorsOrderStayAtHome.pdf</a>                                                                                                                                                                                                                                                       |
| Work-from-home order | 2020-03-23 | 0.42 | Maryland      | <a href="https://governor.maryland.gov/2020/03/23/governor-hogan-announces-closure-of-all-non-essential-businesses-175-million-relief-package-for-workers-and-small-businesses-affected-by-covid-19/">https://governor.maryland.gov/2020/03/23/governor-hogan-announces-closure-of-all-non-essential-businesses-175-million-relief-package-for-workers-and-small-businesses-affected-by-covid-19/</a> |
| Work-from-home order | 2020-03-24 | 0.46 | Michigan      | <a href="https://www.michigan.gov/coronavirus/0,9753,7-406-98178_98455-521682--,00.html">https://www.michigan.gov/coronavirus/0,9753,7-406-98178_98455-521682--,00.html</a>                                                                                                                                                                                                                           |
| Work-from-home order | 2020-03-24 | 0.46 | West Virginia | <a href="https://governor.wv.gov/News/press-releases/2020/Pages/COVID-19-UPDATE-Gov.-Justice-issues-Stay-at-Home-order-for-all-West-Virginians.aspx">https://governor.wv.gov/News/press-releases/2020/Pages/COVID-19-UPDATE-Gov.-Justice-issues-Stay-at-Home-order-for-all-West-Virginians.aspx</a>                                                                                                   |
| Work-from-home order | 2020-03-24 | 0.46 | Delaware      | <a href="https://governor.delaware.gov/wp-content/uploads/sites/24/2020/03/Fourth-Modification-to-State-of-Emergency-03222020.pdf">https://governor.delaware.gov/wp-content/uploads/sites/24/2020/03/Fourth-Modification-to-State-of-Emergency-03222020.pdf</a>                                                                                                                                       |
| Work-from-home order | 2020-03-24 | 0.46 | Vermont       | <a href="https://governor.vermont.gov/sites/scott/files/documents/ADDENDUM%206%20TO%20EXECUTIVE%20ORDER%2001-20.pdf">https://governor.vermont.gov/sites/scott/files/documents/ADDENDUM%206%20TO%20EXECUTIVE%20ORDER%2001-20.pdf</a>                                                                                                                                                                   |
| Work-from-home order | 2020-03-25 | 0.52 | Wisconsin     | <a href="https://content.govdelivery.com/accounts/WIGOV/bulletins/282deef">https://content.govdelivery.com/accounts/WIGOV/bulletins/282deef</a>                                                                                                                                                                                                                                                       |

|                      |            |      |               |                                                                                                                                                                                                                                                                                                                                                                     |
|----------------------|------------|------|---------------|---------------------------------------------------------------------------------------------------------------------------------------------------------------------------------------------------------------------------------------------------------------------------------------------------------------------------------------------------------------------|
| Work-from-home order | 2020-03-25 | 0.52 | Oklahoma      | <a href="https://www.sos.ok.gov/documents/executive/1919.pdf">https://www.sos.ok.gov/documents/executive/1919.pdf</a>                                                                                                                                                                                                                                               |
| Work-from-home order | 2020-03-25 | 0.52 | Indiana       | <a href="https://www.in.gov/gov/3232.htm">https://www.in.gov/gov/3232.htm</a>                                                                                                                                                                                                                                                                                       |
| Work-from-home order | 2020-03-25 | 0.52 | Idaho         | <a href="https://www.idahostatesman.com/news/coronavirus/article241479406.html">https://www.idahostatesman.com/news/coronavirus/article241479406.html</a>                                                                                                                                                                                                           |
| Work-from-home order | 2020-03-25 | 0.52 | Hawaii        | <a href="https://governor.hawaii.gov/newsroom/latest-news/office-of-the-governor-news-release-governor-ige-issues-statewide-order-to-stay-at-home-work-from-home-to-fight-covid-19/">https://governor.hawaii.gov/newsroom/latest-news/office-of-the-governor-news-release-governor-ige-issues-statewide-order-to-stay-at-home-work-from-home-to-fight-covid-19/</a> |
| Work-from-home order | 2020-03-26 | 0.55 | Colorado      | <a href="https://bloximages.newyork1.vip.townnews.com/coloradopoltics.com/content/tncms/assets/v3/editorial/1/5c/15c0d646-6efd-11ea-9f44-936924cd21a7/5e7bfea00dc56.pdf.pdf">https://bloximages.newyork1.vip.townnews.com/coloradopoltics.com/content/tncms/assets/v3/editorial/1/5c/15c0d646-6efd-11ea-9f44-936924cd21a7/5e7bfea00dc56.pdf.pdf</a>                 |
| Work-from-home order | 2020-03-26 | 0.55 | New Hampshire | <a href="https://www.governor.nh.gov/news-media/emergency-orders/documents/emergency-order-17-1.pdf">https://www.governor.nh.gov/news-media/emergency-orders/documents/emergency-order-17-1.pdf</a>                                                                                                                                                                 |
| Work-from-home order | 2020-03-26 | 0.55 | Kentucky      | <a href="https://governor.ky.gov/attachments/20200325_Executive-Order_2020-257_Healthy-at-Home.pdf">https://governor.ky.gov/attachments/20200325_Executive-Order_2020-257_Healthy-at-Home.pdf</a>                                                                                                                                                                   |
| Work-from-home order | 2020-03-27 | 0.58 | Alabama       | <a href="https://governor.alabama.gov/newsroom/2020/04/governor-ivey-issues-stay-at-home-order/">https://governor.alabama.gov/newsroom/2020/04/governor-ivey-issues-stay-at-home-order/</a>                                                                                                                                                                         |
| Work-from-home order | 2020-03-27 | 0.58 | Minnesota     | <a href="https://mn.gov/governor/assets/3a.%20EO%2020-20%20FINAL%20SIGNED%20Filled_tcm1055-425020.pdf">https://mn.gov/governor/assets/3a.%20EO%2020-20%20FINAL%20SIGNED%20Filled_tcm1055-425020.pdf</a>                                                                                                                                                             |
| Work-from-home order | 2020-03-28 | 0.59 | Alaska        | <a href="https://gov.alaska.gov/home/covid19-healthmandates/">https://gov.alaska.gov/home/covid19-healthmandates/</a>                                                                                                                                                                                                                                               |
| Work-from-home order | 2020-03-28 | 0.59 | Montana       | <a href="https://news.mt.gov/governor-bullock-issues-stay-at-home-directive-to-slow-the-spread-of-covid-19">https://news.mt.gov/governor-bullock-issues-stay-at-home-directive-to-slow-the-spread-of-covid-19</a>                                                                                                                                                   |
| Work-from-home order | 2020-03-30 | 0.64 | Kansas        | <a href="https://governor.kansas.gov/governor-kelly-issues-temporary-statewide-stay-home-order-in-ongoing-effort-to-combat-covid-19/">https://governor.kansas.gov/governor-kelly-issues-temporary-statewide-stay-home-order-in-ongoing-effort-to-combat-covid-19/</a>                                                                                               |

|                      |            |      |                      |                                                                                                                                                                                                         |
|----------------------|------------|------|----------------------|---------------------------------------------------------------------------------------------------------------------------------------------------------------------------------------------------------|
| Work-from-home order | 2020-03-30 | 0.64 | Rhode Island         | <a href="http://www.governor.ri.gov/documents/orders/Executive-Order-20-13.pdf">http://www.governor.ri.gov/documents/orders/Executive-Order-20-13.pdf</a>                                               |
| Work-from-home order | 2020-03-30 | 0.64 | District of Columbia | <a href="https://coronavirus.dc.gov/release/mayor-browser-issues-stay-home-order">https://coronavirus.dc.gov/release/mayor-browser-issues-stay-home-order</a>                                           |
| Work-from-home order | 2020-03-30 | 0.64 | North Carolina       | <a href="https://files.nc.gov/governor/documents/files/E0121-Stay-at-Home-Order-3.pdf">https://files.nc.gov/governor/documents/files/E0121-Stay-at-Home-Order-3.pdf</a>                                 |
| Work-from-home order | 2020-04-01 | 0.66 | Tennessee            | <a href="https://publications.tnsofiles.com/pub/execorders/exec-orders-lee22.pdf">https://publications.tnsofiles.com/pub/execorders/exec-orders-lee22.pdf</a>                                           |
| Work-from-home order | 2020-04-02 | 0.74 | Texas                | <a href="https://www.nbcnews.com/health/health-news/here-are-stay-home-orders-across-country-n1168736">https://www.nbcnews.com/health/health-news/here-are-stay-home-orders-across-country-n1168736</a> |
| Work-from-home order | 2020-04-07 | 0.76 | South Carolina       | <a href="http://abcnews4.com/news/local/gov-mcmaster-orders-stay-at-home-order-for-south-carolina">http://abcnews4.com/news/local/gov-mcmaster-orders-stay-at-home-order-for-south-carolina</a>         |

**Table 7.** Sources for policies implemented across different US States

| NPI                     | Date       | Cumulative Region share | Source                                                                                                                                                                                                                                                                                                    |
|-------------------------|------------|-------------------------|-----------------------------------------------------------------------------------------------------------------------------------------------------------------------------------------------------------------------------------------------------------------------------------------------------------|
| Ban of large gatherings | 2020-03-09 | 0.15                    | <a href="https://www.br.de/nachrichten/bayern/coronavirus-bayern-will-grossveranstaltungen-verbieten, RsLNyZ0">https://www.br.de/nachrichten/bayern/coronavirus-bayern-will-grossveranstaltungen-verbieten, RsLNyZ0</a>                                                                                   |
| Ban of large gatherings | 2020-03-10 | 0.37                    | Rhine-Westphalia<br><a href="https://www1.wdr.de/nachrichten/themen/coronavirus/veranstaltungen-corona-virus-absage-nrw-100.html">https://www1.wdr.de/nachrichten/themen/coronavirus/veranstaltungen-corona-virus-absage-nrw-100.html</a>                                                                 |
| Ban of large gatherings | 2020-03-11 | 0.70                    | Baden-Wuerttemberg<br><a href="https://bnn.de/lokales/karlsruhe/baden-wuerttemberg-will-grosse-veranstaltungen-gegen-des-coronavirus-untersagen-lassen">https://bnn.de/lokales/karlsruhe/baden-wuerttemberg-will-grosse-veranstaltungen-gegen-des-coronavirus-untersagen-lassen</a>                       |
| Ban of large gatherings | 2020-03-11 | 0.70                    | Berlin<br><a href="https://www.t-online.de/nachrichten/panorama/id_87498882/coronavirus-in-diesen-bundeslaendern-sind-grossveranstaltungen-verboten.html">https://www.t-online.de/nachrichten/panorama/id_87498882/coronavirus-in-diesen-bundeslaendern-sind-grossveranstaltungen-verboten.html</a>       |
| Ban of large gatherings | 2020-03-11 | 0.70                    | Hamburg<br><a href="https://www.t-online.de/nachrichten/panorama/id_87498882/coronavirus-in-diesen-bundeslaendern-sind-grossveranstaltungen-verboten.html">https://www.t-online.de/nachrichten/panorama/id_87498882/coronavirus-in-diesen-bundeslaendern-sind-grossveranstaltungen-verboten.html</a>      |
| Ban of large gatherings | 2020-03-11 | 0.70                    | Lower Saxony<br><a href="https://www.t-online.de/nachrichten/panorama/id_87498882/coronavirus-in-diesen-bundeslaendern-sind-grossveranstaltungen-verboten.html">https://www.t-online.de/nachrichten/panorama/id_87498882/coronavirus-in-diesen-bundeslaendern-sind-grossveranstaltungen-verboten.html</a> |
| Ban of large gatherings | 2020-03-11 | 0.70                    | Schleswig-Holstein<br><a href="https://www.ndr.de/nachrichten/schleswig-holstein/Details-zur-Absage-von-Grossveranstaltungen-,pk214.html">https://www.ndr.de/nachrichten/schleswig-holstein/Details-zur-Absage-von-Grossveranstaltungen-,pk214.html</a>                                                   |
| Ban of large gatherings | 2020-03-12 | 0.73                    | Bremen<br><a href="https://www.t-online.de/nachrichten/panorama/id_87498882/coronavirus-in-diesen-bundeslaendern-sind-grossveranstaltungen-verboten.html">https://www.t-online.de/nachrichten/panorama/id_87498882/coronavirus-in-diesen-bundeslaendern-sind-grossveranstaltungen-verboten.html</a>       |
| Ban of large gatherings | 2020-03-12 | 0.73                    | Thuringia<br><a href="https://www.mdr.de/thueringen/coronavirus-veranstaltungen-massnahmen-teilnehmer-100.html">https://www.mdr.de/thueringen/coronavirus-veranstaltungen-massnahmen-teilnehmer-100.html</a>                                                                                              |
| Ban of large gatherings | 2020-03-13 | 1.00                    | Brandenburg<br><a href="https://twitter.com/StM_Klose/status/1238028608469336070">https://twitter.com/StM_Klose/status/1238028608469336070</a>                                                                                                                                                            |
| Ban of large gatherings | 2020-03-13 | 1.00                    | Hesse<br><a href="https://twitter.com/StM_Klose/status/1238028608469336070">https://twitter.com/StM_Klose/status/1238028608469336070</a>                                                                                                                                                                  |



|                         |             |                         |                               |                                                                                                                                                                                                                                                                                                                                               |
|-------------------------|-------------|-------------------------|-------------------------------|-----------------------------------------------------------------------------------------------------------------------------------------------------------------------------------------------------------------------------------------------------------------------------------------------------------------------------------------------|
| Ban of large gatherings | 2020-03-13  | 1.00                    | Mecklenburg-Western Pomerania | <a href="https://twitter.com/StM_Klose/status/1238028608469336070">https://twitter.com/StM_Klose/status/1238028608469336070</a>                                                                                                                                                                                                               |
| Ban of large gatherings | 2020-03-13  | 1.00                    | Rhineland-Palatinate          | <a href="https://twitter.com/StM_Klose/status/1238028608469336070">https://twitter.com/StM_Klose/status/1238028608469336070</a>                                                                                                                                                                                                               |
| Ban of large gatherings | 2020-03-13  | 1.00                    | Saarland                      | <a href="https://twitter.com/StM_Klose/status/1238028608469336070">https://twitter.com/StM_Klose/status/1238028608469336070</a>                                                                                                                                                                                                               |
| Ban of large gatherings | 2020-03-13  | 1.00                    | Saxony                        | <a href="https://twitter.com/StM_Klose/status/1238028608469336070">https://twitter.com/StM_Klose/status/1238028608469336070</a>                                                                                                                                                                                                               |
| Ban of large gatherings | 2020-03-13  | 1.00                    | Saxony-Anhalt                 | <a href="https://twitter.com/StM_Klose/status/1238028608469336070">https://twitter.com/StM_Klose/status/1238028608469336070</a>                                                                                                                                                                                                               |
| <b>NPI</b>              | <b>Date</b> | <b>Cumulative share</b> | <b>Region</b>                 | <b>Source</b>                                                                                                                                                                                                                                                                                                                                 |
| Ban of small gatherings | 2020-03-14  | 0.04                    | Berlin                        | <a href="https://www.reuters.com/article/us-health-coronavirus-germany/berlin-joins-cologne-in-closing-bars-clubs-as-germany-toughens-coronavirus-response-idUSKBN2110LS">https://www.reuters.com/article/us-health-coronavirus-germany/berlin-joins-cologne-in-closing-bars-clubs-as-germany-toughens-coronavirus-response-idUSKBN2110LS</a> |
| Ban of small gatherings | 2020-03-17  | 0.20                    | Bavaria                       | <a href="https://www.reuters.com/article/us-health-coronavirus-germany-economy/merkel-says-lets-get-through-this-as-shops-bars-and-churches-shut-idUSKBN213178">https://www.reuters.com/article/us-health-coronavirus-germany-economy/merkel-says-lets-get-through-this-as-shops-bars-and-churches-shut-idUSKBN213178</a>                     |
| Ban of small gatherings | 2020-03-23  | 1.00                    | Baden-Wuerttemberg            | <a href="https://www.bundesregierung.de/breg-de/themen/coronavirus/faqs-neue-leitlinien-1733416">https://www.bundesregierung.de/breg-de/themen/coronavirus/faqs-neue-leitlinien-1733416</a>                                                                                                                                                   |
| Ban of small gatherings | 2020-03-23  | 1.00                    | Brandenburg                   | <a href="https://www.bundesregierung.de/breg-de/themen/coronavirus/faqs-neue-leitlinien-1733416">https://www.bundesregierung.de/breg-de/themen/coronavirus/faqs-neue-leitlinien-1733416</a>                                                                                                                                                   |
| Ban of small gatherings | 2020-03-23  | 1.00                    | Bremen                        | <a href="https://www.bundesregierung.de/breg-de/themen/coronavirus/faqs-neue-leitlinien-1733416">https://www.bundesregierung.de/breg-de/themen/coronavirus/faqs-neue-leitlinien-1733416</a>                                                                                                                                                   |
| Ban of small gatherings | 2020-03-23  | 1.00                    | Hamburg                       | <a href="https://www.bundesregierung.de/breg-de/themen/coronavirus/faqs-neue-leitlinien-1733416">https://www.bundesregierung.de/breg-de/themen/coronavirus/faqs-neue-leitlinien-1733416</a>                                                                                                                                                   |

| Ban of small gatherings | 2020-03-23 | 1.00             | Hesse                         | <a href="https://www.bundesregierung.de/breg-de/themen/coronavirus/faqs-neue-leitlinien-1733416">https://www.bundesregierung.de/breg-de/themen/coronavirus/faqs-neue-leitlinien-1733416</a>                                                                 |
|-------------------------|------------|------------------|-------------------------------|-------------------------------------------------------------------------------------------------------------------------------------------------------------------------------------------------------------------------------------------------------------|
| Ban of small gatherings | 2020-03-23 | 1.00             | Lower Saxony                  | <a href="https://www.bundesregierung.de/breg-de/themen/coronavirus/faqs-neue-leitlinien-1733416">https://www.bundesregierung.de/breg-de/themen/coronavirus/faqs-neue-leitlinien-1733416</a>                                                                 |
| Ban of small gatherings | 2020-03-23 | 1.00             | Mecklenburg-Western Pomerania | <a href="https://www.bundesregierung.de/breg-de/themen/coronavirus/faqs-neue-leitlinien-1733416">https://www.bundesregierung.de/breg-de/themen/coronavirus/faqs-neue-leitlinien-1733416</a>                                                                 |
| Ban of small gatherings | 2020-03-23 | 1.00             | North Rhine-Westphalia        | <a href="https://www.bundesregierung.de/breg-de/themen/coronavirus/faqs-neue-leitlinien-1733416">https://www.bundesregierung.de/breg-de/themen/coronavirus/faqs-neue-leitlinien-1733416</a>                                                                 |
| Ban of small gatherings | 2020-03-23 | 1.00             | Rhineland-Palatinate          | <a href="https://www.bundesregierung.de/breg-de/themen/coronavirus/faqs-neue-leitlinien-1733416">https://www.bundesregierung.de/breg-de/themen/coronavirus/faqs-neue-leitlinien-1733416</a>                                                                 |
| Ban of small gatherings | 2020-03-23 | 1.00             | Saarland                      | <a href="https://www.bundesregierung.de/breg-de/themen/coronavirus/faqs-neue-leitlinien-1733416">https://www.bundesregierung.de/breg-de/themen/coronavirus/faqs-neue-leitlinien-1733416</a>                                                                 |
| Ban of small gatherings | 2020-03-23 | 1.00             | Saxony                        | <a href="https://www.bundesregierung.de/breg-de/themen/coronavirus/faqs-neue-leitlinien-1733416">https://www.bundesregierung.de/breg-de/themen/coronavirus/faqs-neue-leitlinien-1733416</a>                                                                 |
| Ban of small gatherings | 2020-03-23 | 1.00             | Saxony-Anhalt                 | <a href="https://www.bundesregierung.de/breg-de/themen/coronavirus/faqs-neue-leitlinien-1733416">https://www.bundesregierung.de/breg-de/themen/coronavirus/faqs-neue-leitlinien-1733416</a>                                                                 |
| Ban of small gatherings | 2020-03-23 | 1.00             | Schleswig-Holstein            | <a href="https://www.bundesregierung.de/breg-de/themen/coronavirus/faqs-neue-leitlinien-1733416">https://www.bundesregierung.de/breg-de/themen/coronavirus/faqs-neue-leitlinien-1733416</a>                                                                 |
| Ban of small gatherings | 2020-03-23 | 1.00             | Thuringia                     | <a href="https://www.bundesregierung.de/breg-de/themen/coronavirus/faqs-neue-leitlinien-1733416">https://www.bundesregierung.de/breg-de/themen/coronavirus/faqs-neue-leitlinien-1733416</a>                                                                 |
| NPI                     | Date       | Cumulative share | Region                        | Source                                                                                                                                                                                                                                                      |
| School closure          | 2020-03-16 | 0.81             | Bavaria                       | <a href="https://www.spiegel.de/international/germany/the-shutdown-begins-across-germany-a-3c541d1d-1d42-4672-9fdc-af6c3247df76">https://www.spiegel.de/international/germany/the-shutdown-begins-across-germany-a-3c541d1d-1d42-4672-9fdc-af6c3247df76</a> |
| School closure          | 2020-03-16 | 0.81             | Berlin                        | <a href="https://www.spiegel.de/international/germany/the-shutdown-begins-across-germany-a-3c541d1d-1d42-4672-9fdc-af6c3247df76">https://www.spiegel.de/international/germany/the-shutdown-begins-across-germany-a-3c541d1d-1d42-4672-9fdc-af6c3247df76</a> |

|                |            |      |                               |                                                                                                                                                                                                                                                                                                                       |
|----------------|------------|------|-------------------------------|-----------------------------------------------------------------------------------------------------------------------------------------------------------------------------------------------------------------------------------------------------------------------------------------------------------------------|
| School closure | 2020-03-16 | 0.81 | Bremen                        | <a href="https://www.spiegel.de/international/germany/the-shutdown-begins-across-germany-a-3c541d1d-1d42-4672-9fdc-af6c3247df76">https://www.spiegel.de/international/germany/the-shutdown-begins-across-germany-a-3c541d1d-1d42-4672-9fdc-af6c3247df76</a>                                                           |
| School closure | 2020-03-16 | 0.81 | Hamburg                       | <a href="https://www.spiegel.de/international/germany/the-shutdown-begins-across-germany-a-3c541d1d-1d42-4672-9fdc-af6c3247df76">https://www.spiegel.de/international/germany/the-shutdown-begins-across-germany-a-3c541d1d-1d42-4672-9fdc-af6c3247df76</a>                                                           |
| School closure | 2020-03-16 | 0.81 | Hesse                         | <a href="https://www.spiegel.de/international/germany/the-shutdown-begins-across-germany-a-3c541d1d-1d42-4672-9fdc-af6c3247df76">https://www.spiegel.de/international/germany/the-shutdown-begins-across-germany-a-3c541d1d-1d42-4672-9fdc-af6c3247df76</a>                                                           |
| School closure | 2020-03-16 | 0.81 | Lower Saxony                  | <a href="https://www.spiegel.de/international/germany/the-shutdown-begins-across-germany-a-3c541d1d-1d42-4672-9fdc-af6c3247df76">https://www.spiegel.de/international/germany/the-shutdown-begins-across-germany-a-3c541d1d-1d42-4672-9fdc-af6c3247df76</a>                                                           |
| School closure | 2020-03-16 | 0.81 | Mecklenburg-Western Pomerania | <a href="https://www.spiegel.de/international/germany/the-shutdown-begins-across-germany-a-3c541d1d-1d42-4672-9fdc-af6c3247df76">https://www.spiegel.de/international/germany/the-shutdown-begins-across-germany-a-3c541d1d-1d42-4672-9fdc-af6c3247df76</a>                                                           |
| School closure | 2020-03-16 | 0.81 | North Rhine-Westphalia        | <a href="https://www.spiegel.de/international/germany/the-shutdown-begins-across-germany-a-3c541d1d-1d42-4672-9fdc-af6c3247df76">https://www.spiegel.de/international/germany/the-shutdown-begins-across-germany-a-3c541d1d-1d42-4672-9fdc-af6c3247df76</a>                                                           |
| School closure | 2020-03-16 | 0.81 | Rhineland-Palatinate          | <a href="https://www.spiegel.de/international/germany/the-shutdown-begins-across-germany-a-3c541d1d-1d42-4672-9fdc-af6c3247df76">https://www.spiegel.de/international/germany/the-shutdown-begins-across-germany-a-3c541d1d-1d42-4672-9fdc-af6c3247df76</a>                                                           |
| School closure | 2020-03-16 | 0.81 | Saarland                      | <a href="https://www.spiegel.de/international/germany/the-shutdown-begins-across-germany-a-3c541d1d-1d42-4672-9fdc-af6c3247df76">https://www.spiegel.de/international/germany/the-shutdown-begins-across-germany-a-3c541d1d-1d42-4672-9fdc-af6c3247df76</a>                                                           |
| School closure | 2020-03-16 | 0.81 | Saxony                        | <a href="https://www.spiegel.de/international/germany/germany-states-move-to-close-educational-and-daycare-facilities-a-e9c13296-002b-484b-88bc-e14ea295ff10">https://www.spiegel.de/international/germany/germany-states-move-to-close-educational-and-daycare-facilities-a-e9c13296-002b-484b-88bc-e14ea295ff10</a> |
| School closure | 2020-03-16 | 0.81 | Saxony-Anhalt                 | <a href="https://www.spiegel.de/international/germany/the-shutdown-begins-across-germany-a-3c541d1d-1d42-4672-9fdc-af6c3247df76">https://www.spiegel.de/international/germany/the-shutdown-begins-across-germany-a-3c541d1d-1d42-4672-9fdc-af6c3247df76</a>                                                           |
| School closure | 2020-03-16 | 0.81 | Schleswig-Holstein            | <a href="https://www.spiegel.de/international/germany/the-shutdown-begins-across-germany-a-3c541d1d-1d42-4672-9fdc-af6c3247df76">https://www.spiegel.de/international/germany/the-shutdown-begins-across-germany-a-3c541d1d-1d42-4672-9fdc-af6c3247df76</a>                                                           |
| School closure | 2020-03-17 | 0.97 | Baden-Wuerttemberg            | <a href="https://www.spiegel.de/international/germany/the-shutdown-begins-across-germany-a-3c541d1d-1d42-4672-9fdc-af6c3247df76">https://www.spiegel.de/international/germany/the-shutdown-begins-across-germany-a-3c541d1d-1d42-4672-9fdc-af6c3247df76</a>                                                           |

|                |            |      |             |                                                                                                                                                                                                                                                             |
|----------------|------------|------|-------------|-------------------------------------------------------------------------------------------------------------------------------------------------------------------------------------------------------------------------------------------------------------|
| School closure | 2020-03-17 | 0.97 | Thuringia   | <a href="https://www.spiegel.de/international/germany/the-shutdown-begins-across-germany-a-3c541d1d-1d42-4672-9fdc-af6c3247df76">https://www.spiegel.de/international/germany/the-shutdown-begins-across-germany-a-3c541d1d-1d42-4672-9fdc-af6c3247df76</a> |
| School closure | 2020-03-18 | 1.00 | Brandenburg | <a href="https://www.spiegel.de/international/germany/the-shutdown-begins-across-germany-a-3c541d1d-1d42-4672-9fdc-af6c3247df76">https://www.spiegel.de/international/germany/the-shutdown-begins-across-germany-a-3c541d1d-1d42-4672-9fdc-af6c3247df76</a> |

| NPI        | Date       | Cumulative share | Region             | Source                                                                                                                                                                                                                                                                                                                                        |
|------------|------------|------------------|--------------------|-----------------------------------------------------------------------------------------------------------------------------------------------------------------------------------------------------------------------------------------------------------------------------------------------------------------------------------------------|
| Venue sure | 2020-03-14 | 0.05             | Berlin             | <a href="https://www.reuters.com/article/us-health-coronavirus-germany/berlin-joins-cologne-in-closing-bars-clubs-as-germany-toughens-coronavirus-response-idUSKBN2110LS">https://www.reuters.com/article/us-health-coronavirus-germany/berlin-joins-cologne-in-closing-bars-clubs-as-germany-toughens-coronavirus-response-idUSKBN2110LS</a> |
| Venue sure | 2020-03-14 | 0.05             | Saarland           | <a href="https://www.reuters.com/article/us-health-coronavirus-germany/berlin-joins-cologne-in-closing-bars-clubs-as-germany-toughens-coronavirus-response-idUSKBN2110LS">https://www.reuters.com/article/us-health-coronavirus-germany/berlin-joins-cologne-in-closing-bars-clubs-as-germany-toughens-coronavirus-response-idUSKBN2110LS</a> |
| Venue sure | 2020-03-16 | 1.00             | Baden-Wuerttemberg | <a href="https://www.bundesregierung.de/breg-de/themen/coronavirus/leitlinien-bund-laender-1731000">https://www.bundesregierung.de/breg-de/themen/coronavirus/leitlinien-bund-laender-1731000</a>                                                                                                                                             |
| Venue sure | 2020-03-16 | 1.00             | Bavaria            | <a href="https://www.bundesregierung.de/breg-de/themen/coronavirus/leitlinien-bund-laender-1731000">https://www.bundesregierung.de/breg-de/themen/coronavirus/leitlinien-bund-laender-1731000</a>                                                                                                                                             |
| Venue sure | 2020-03-16 | 1.00             | Brandenburg        | <a href="https://www.bundesregierung.de/breg-de/themen/coronavirus/leitlinien-bund-laender-1731000">https://www.bundesregierung.de/breg-de/themen/coronavirus/leitlinien-bund-laender-1731000</a>                                                                                                                                             |
| Venue sure | 2020-03-16 | 1.00             | Bremen             | <a href="https://www.bundesregierung.de/breg-de/themen/coronavirus/leitlinien-bund-laender-1731000">https://www.bundesregierung.de/breg-de/themen/coronavirus/leitlinien-bund-laender-1731000</a>                                                                                                                                             |
| Venue sure | 2020-03-16 | 1.00             | Hamburg            | <a href="https://www.bundesregierung.de/breg-de/themen/coronavirus/leitlinien-bund-laender-1731000">https://www.bundesregierung.de/breg-de/themen/coronavirus/leitlinien-bund-laender-1731000</a>                                                                                                                                             |
| Venue sure | 2020-03-16 | 1.00             | Hesse              | <a href="https://www.bundesregierung.de/breg-de/themen/coronavirus/leitlinien-bund-laender-1731000">https://www.bundesregierung.de/breg-de/themen/coronavirus/leitlinien-bund-laender-1731000</a>                                                                                                                                             |
| Venue sure | 2020-03-16 | 1.00             | Lower Saxony       | <a href="https://www.bundesregierung.de/breg-de/themen/coronavirus/leitlinien-bund-laender-1731000">https://www.bundesregierung.de/breg-de/themen/coronavirus/leitlinien-bund-laender-1731000</a>                                                                                                                                             |

|            |      |                                     |                   |                    |                                                                                                                                                                   |
|------------|------|-------------------------------------|-------------------|--------------------|-------------------------------------------------------------------------------------------------------------------------------------------------------------------|
| Venue      | clo- | 2020-03-16                          | 1.00              | Mecklenburg-       | <a href="https://www.bundesregierung.de/breg-de/themen/coronavirus/leitlinien-sure">https://www.bundesregierung.de/breg-de/themen/coronavirus/leitlinien-sure</a> |
|            | sure |                                     |                   | Western Pomerania  | <a href="https://www.bundesregierung.de/breg-de/themen/coronavirus/leitlinien-sure">bund-laender-1731000</a>                                                      |
| Venue      | clo- | 2020-03-16                          | 1.00              | North              | <a href="https://www.bundesregierung.de/breg-de/themen/coronavirus/leitlinien-sure">https://www.bundesregierung.de/breg-de/themen/coronavirus/leitlinien-sure</a> |
|            | sure |                                     |                   | Westphalia         | <a href="https://www.bundesregierung.de/breg-de/themen/coronavirus/leitlinien-sure">bund-laender-1731000</a>                                                      |
| Venue      | clo- | 2020-03-16                          | 1.00              | Rhineland-         | <a href="https://www.bundesregierung.de/breg-de/themen/coronavirus/leitlinien-sure">https://www.bundesregierung.de/breg-de/themen/coronavirus/leitlinien-sure</a> |
|            | sure |                                     |                   | Palatinate         | <a href="https://www.bundesregierung.de/breg-de/themen/coronavirus/leitlinien-sure">bund-laender-1731000</a>                                                      |
| Venue      | clo- | 2020-03-16                          | 1.00              | Saxony             | <a href="https://www.bundesregierung.de/breg-de/themen/coronavirus/leitlinien-sure">https://www.bundesregierung.de/breg-de/themen/coronavirus/leitlinien-sure</a> |
|            | sure |                                     |                   | Saxony-Anhalt      | <a href="https://www.bundesregierung.de/breg-de/themen/coronavirus/leitlinien-sure">bund-laender-1731000</a>                                                      |
| Venue      | clo- | 2020-03-16                          | 1.00              | Schleswig-Holstein | <a href="https://www.bundesregierung.de/breg-de/themen/coronavirus/leitlinien-sure">https://www.bundesregierung.de/breg-de/themen/coronavirus/leitlinien-sure</a> |
|            | sure |                                     |                   | Thuringia          | <a href="https://www.bundesregierung.de/breg-de/themen/coronavirus/leitlinien-sure">bund-laender-1731000</a>                                                      |
| <b>NPI</b> |      | <b>Date</b>                         | <b>Cumulative</b> | <b>Region</b>      | <b>Source</b>                                                                                                                                                     |
|            |      |                                     | <b>share</b>      |                    |                                                                                                                                                                   |
| Lockdown   |      | 2020-03-21                          | 0.15              | Bavaria            | <a href="https://www.corona-katastrophenschutz.bayern.de/">https://www.corona-katastrophenschutz.bayern.de/</a>                                                   |
| <b>NPI</b> |      | <b>Date</b>                         | <b>Cumulative</b> | <b>Region</b>      | <b>Source</b>                                                                                                                                                     |
|            |      |                                     | <b>share</b>      |                    |                                                                                                                                                                   |
| Work-from- |      | <i>NPI implemented in no region</i> |                   |                    |                                                                                                                                                                   |
| home order |      |                                     |                   |                    |                                                                                                                                                                   |

**Table 8.** Sources for policies implemented across different German regions

| NPI                     | Date       | Cumulative Region share | Source                                                                                                                                                                                                                                                                                                                                                               |
|-------------------------|------------|-------------------------|----------------------------------------------------------------------------------------------------------------------------------------------------------------------------------------------------------------------------------------------------------------------------------------------------------------------------------------------------------------------|
| Ban of large gatherings | 2020-03-10 | 0.15                    | <a href="https://www.eldiario.es/sociedad/Sanidad-consejo-ministros-medidas_0_1004400105.html">https://www.eldiario.es/sociedad/Sanidad-consejo-ministros-medidas_0_1004400105.html</a>                                                                                                                                                                              |
| Ban of large gatherings | 2020-03-10 | 0.15                    | Community of Madrid <a href="https://www.eldiario.es/sociedad/Sanidad-consejo-ministros-medidas_0_1004400105.html">https://www.eldiario.es/sociedad/Sanidad-consejo-ministros-medidas_0_1004400105.html</a>                                                                                                                                                          |
| Ban of large gatherings | 2020-03-12 | 0.31                    | Catalonia <a href="https://www.catalannews.com/society-science/item/catalonia-bans-events-of-over-1000-people-in-efforts-to-control-coronavirus">https://www.catalannews.com/society-science/item/catalonia-bans-events-of-over-1000-people-in-efforts-to-control-coronavirus</a>                                                                                    |
| Ban of large gatherings | 2020-03-13 | 1.00                    | Andalusia <a href="https://elpais.com/sociedad/2020-03-12/el-gobierno-extiende-a-toda-espana-la-recomendacion-de-cancelar-clases-y-celebrar-eventos-masivos-en-espacios-cerrados.html">https://elpais.com/sociedad/2020-03-12/el-gobierno-extiende-a-toda-espana-la-recomendacion-de-cancelar-clases-y-celebrar-eventos-masivos-en-espacios-cerrados.html</a>        |
| Ban of large gatherings | 2020-03-13 | 1.00                    | Navarre <a href="https://elpais.com/sociedad/2020-03-12/el-gobierno-extiende-a-toda-espana-la-recomendacion-de-cancelar-clases-y-celebrar-eventos-masivos-en-espacios-cerrados.html">https://elpais.com/sociedad/2020-03-12/el-gobierno-extiende-a-toda-espana-la-recomendacion-de-cancelar-clases-y-celebrar-eventos-masivos-en-espacios-cerrados.html</a>          |
| Ban of large gatherings | 2020-03-13 | 1.00                    | Galicia <a href="https://elpais.com/sociedad/2020-03-12/el-gobierno-extiende-a-toda-espana-la-recomendacion-de-cancelar-clases-y-celebrar-eventos-masivos-en-espacios-cerrados.html">https://elpais.com/sociedad/2020-03-12/el-gobierno-extiende-a-toda-espana-la-recomendacion-de-cancelar-clases-y-celebrar-eventos-masivos-en-espacios-cerrados.html</a>          |
| Ban of large gatherings | 2020-03-13 | 1.00                    | Extremadura <a href="https://elpais.com/sociedad/2020-03-12/el-gobierno-extiende-a-toda-espana-la-recomendacion-de-cancelar-clases-y-celebrar-eventos-masivos-en-espacios-cerrados.html">https://elpais.com/sociedad/2020-03-12/el-gobierno-extiende-a-toda-espana-la-recomendacion-de-cancelar-clases-y-celebrar-eventos-masivos-en-espacios-cerrados.html</a>      |
| Ban of large gatherings | 2020-03-13 | 1.00                    | Region of Murcia <a href="https://elpais.com/sociedad/2020-03-12/el-gobierno-extiende-a-toda-espana-la-recomendacion-de-cancelar-clases-y-celebrar-eventos-masivos-en-espacios-cerrados.html">https://elpais.com/sociedad/2020-03-12/el-gobierno-extiende-a-toda-espana-la-recomendacion-de-cancelar-clases-y-celebrar-eventos-masivos-en-espacios-cerrados.html</a> |

|                         |            |      |                    |                                                                                                                                                                                                                                                                                                                                                     |
|-------------------------|------------|------|--------------------|-----------------------------------------------------------------------------------------------------------------------------------------------------------------------------------------------------------------------------------------------------------------------------------------------------------------------------------------------------|
| Ban of large gatherings | 2020-03-13 | 1.00 | Castille-La Mancha | <a href="https://elpais.com/sociedad/2020-03-12/el-gobierno-extiende-a-toda-espana-la-recomendacion-de-cancelar-clases-y-celebrar-eventos-masivos-en-espacios-cerrados.html">https://elpais.com/sociedad/2020-03-12/el-gobierno-extiende-a-toda-espana-la-recomendacion-de-cancelar-clases-y-celebrar-eventos-masivos-en-espacios-cerrados.html</a> |
| Ban of large gatherings | 2020-03-13 | 1.00 | Cantabria          | <a href="https://elpais.com/sociedad/2020-03-12/el-gobierno-extiende-a-toda-espana-la-recomendacion-de-cancelar-clases-y-celebrar-eventos-masivos-en-espacios-cerrados.html">https://elpais.com/sociedad/2020-03-12/el-gobierno-extiende-a-toda-espana-la-recomendacion-de-cancelar-clases-y-celebrar-eventos-masivos-en-espacios-cerrados.html</a> |
| Ban of large gatherings | 2020-03-13 | 1.00 | Canary Islands     | <a href="https://elpais.com/sociedad/2020-03-12/el-gobierno-extiende-a-toda-espana-la-recomendacion-de-cancelar-clases-y-celebrar-eventos-masivos-en-espacios-cerrados.html">https://elpais.com/sociedad/2020-03-12/el-gobierno-extiende-a-toda-espana-la-recomendacion-de-cancelar-clases-y-celebrar-eventos-masivos-en-espacios-cerrados.html</a> |
| Ban of large gatherings | 2020-03-13 | 1.00 | Basque Country     | <a href="https://elpais.com/sociedad/2020-03-12/el-gobierno-extiende-a-toda-espana-la-recomendacion-de-cancelar-clases-y-celebrar-eventos-masivos-en-espacios-cerrados.html">https://elpais.com/sociedad/2020-03-12/el-gobierno-extiende-a-toda-espana-la-recomendacion-de-cancelar-clases-y-celebrar-eventos-masivos-en-espacios-cerrados.html</a> |
| Ban of large gatherings | 2020-03-13 | 1.00 | Balearic Islands   | <a href="https://elpais.com/sociedad/2020-03-12/el-gobierno-extiende-a-toda-espana-la-recomendacion-de-cancelar-clases-y-celebrar-eventos-masivos-en-espacios-cerrados.html">https://elpais.com/sociedad/2020-03-12/el-gobierno-extiende-a-toda-espana-la-recomendacion-de-cancelar-clases-y-celebrar-eventos-masivos-en-espacios-cerrados.html</a> |
| Ban of large gatherings | 2020-03-13 | 1.00 | Asturias           | <a href="https://elpais.com/sociedad/2020-03-12/el-gobierno-extiende-a-toda-espana-la-recomendacion-de-cancelar-clases-y-celebrar-eventos-masivos-en-espacios-cerrados.html">https://elpais.com/sociedad/2020-03-12/el-gobierno-extiende-a-toda-espana-la-recomendacion-de-cancelar-clases-y-celebrar-eventos-masivos-en-espacios-cerrados.html</a> |
| Ban of large gatherings | 2020-03-13 | 1.00 | Aragon             | <a href="https://elpais.com/sociedad/2020-03-12/el-gobierno-extiende-a-toda-espana-la-recomendacion-de-cancelar-clases-y-celebrar-eventos-masivos-en-espacios-cerrados.html">https://elpais.com/sociedad/2020-03-12/el-gobierno-extiende-a-toda-espana-la-recomendacion-de-cancelar-clases-y-celebrar-eventos-masivos-en-espacios-cerrados.html</a> |
| Ban of large gatherings | 2020-03-13 | 1.00 | Castille and Leon  | <a href="https://elpais.com/sociedad/2020-03-12/el-gobierno-extiende-a-toda-espana-la-recomendacion-de-cancelar-clases-y-celebrar-eventos-masivos-en-espacios-cerrados.html">https://elpais.com/sociedad/2020-03-12/el-gobierno-extiende-a-toda-espana-la-recomendacion-de-cancelar-clases-y-celebrar-eventos-masivos-en-espacios-cerrados.html</a> |

Ban of large gatherings 2020-03-13 1.00 Valencian Community <https://elpais.com/sociedad/2020-03-12/el-gobierno-extiende-a-toda-espana-la-recomendacion-de-cancelar-clases-y-celebrar-eventos-masivos-en-espacios-cerrados.html>

| NPI                     | Date       | Cumulative share | Region              | Source                                                                                                                                                                                            |
|-------------------------|------------|------------------|---------------------|---------------------------------------------------------------------------------------------------------------------------------------------------------------------------------------------------|
| Ban of small gatherings | 2020-03-15 | 1.00             | Andalusia           | <a href="https://www.cnbc.com/2020/03/14/spain-declares-state-of-emergency-due-to-coronavirus.html">https://www.cnbc.com/2020/03/14/spain-declares-state-of-emergency-due-to-coronavirus.html</a> |
| Ban of small gatherings | 2020-03-15 | 1.00             | Navarre             | <a href="https://www.cnbc.com/2020/03/14/spain-declares-state-of-emergency-due-to-coronavirus.html">https://www.cnbc.com/2020/03/14/spain-declares-state-of-emergency-due-to-coronavirus.html</a> |
| Ban of small gatherings | 2020-03-15 | 1.00             | La Rioja            | <a href="https://www.cnbc.com/2020/03/14/spain-declares-state-of-emergency-due-to-coronavirus.html">https://www.cnbc.com/2020/03/14/spain-declares-state-of-emergency-due-to-coronavirus.html</a> |
| Ban of small gatherings | 2020-03-15 | 1.00             | Galicia             | <a href="https://www.cnbc.com/2020/03/14/spain-declares-state-of-emergency-due-to-coronavirus.html">https://www.cnbc.com/2020/03/14/spain-declares-state-of-emergency-due-to-coronavirus.html</a> |
| Ban of small gatherings | 2020-03-15 | 1.00             | Extremadura         | <a href="https://www.cnbc.com/2020/03/14/spain-declares-state-of-emergency-due-to-coronavirus.html">https://www.cnbc.com/2020/03/14/spain-declares-state-of-emergency-due-to-coronavirus.html</a> |
| Ban of small gatherings | 2020-03-15 | 1.00             | Community of Madrid | <a href="https://www.cnbc.com/2020/03/14/spain-declares-state-of-emergency-due-to-coronavirus.html">https://www.cnbc.com/2020/03/14/spain-declares-state-of-emergency-due-to-coronavirus.html</a> |
| Ban of small gatherings | 2020-03-15 | 1.00             | Catalonia           | <a href="https://www.cnbc.com/2020/03/14/spain-declares-state-of-emergency-due-to-coronavirus.html">https://www.cnbc.com/2020/03/14/spain-declares-state-of-emergency-due-to-coronavirus.html</a> |
| Ban of small gatherings | 2020-03-15 | 1.00             | Region of Murcia    | <a href="https://www.cnbc.com/2020/03/14/spain-declares-state-of-emergency-due-to-coronavirus.html">https://www.cnbc.com/2020/03/14/spain-declares-state-of-emergency-due-to-coronavirus.html</a> |
| Ban of small gatherings | 2020-03-15 | 1.00             | Castille-La Mancha  | <a href="https://www.cnbc.com/2020/03/14/spain-declares-state-of-emergency-due-to-coronavirus.html">https://www.cnbc.com/2020/03/14/spain-declares-state-of-emergency-due-to-coronavirus.html</a> |
| Ban of small gatherings | 2020-03-15 | 1.00             | Cantabria           | <a href="https://www.cnbc.com/2020/03/14/spain-declares-state-of-emergency-due-to-coronavirus.html">https://www.cnbc.com/2020/03/14/spain-declares-state-of-emergency-due-to-coronavirus.html</a> |



|                         |            |      |                     |                                                                                                                                                                                                   |
|-------------------------|------------|------|---------------------|---------------------------------------------------------------------------------------------------------------------------------------------------------------------------------------------------|
| Ban of small gatherings | 2020-03-15 | 1.00 | Canary Islands      | <a href="https://www.cnbc.com/2020/03/14/spain-declares-state-of-emergency-due-to-coronavirus.html">https://www.cnbc.com/2020/03/14/spain-declares-state-of-emergency-due-to-coronavirus.html</a> |
| Ban of small gatherings | 2020-03-15 | 1.00 | Basque Country      | <a href="https://www.cnbc.com/2020/03/14/spain-declares-state-of-emergency-due-to-coronavirus.html">https://www.cnbc.com/2020/03/14/spain-declares-state-of-emergency-due-to-coronavirus.html</a> |
| Ban of small gatherings | 2020-03-15 | 1.00 | Balearic Islands    | <a href="https://www.cnbc.com/2020/03/14/spain-declares-state-of-emergency-due-to-coronavirus.html">https://www.cnbc.com/2020/03/14/spain-declares-state-of-emergency-due-to-coronavirus.html</a> |
| Ban of small gatherings | 2020-03-15 | 1.00 | Asturias            | <a href="https://www.cnbc.com/2020/03/14/spain-declares-state-of-emergency-due-to-coronavirus.html">https://www.cnbc.com/2020/03/14/spain-declares-state-of-emergency-due-to-coronavirus.html</a> |
| Ban of small gatherings | 2020-03-15 | 1.00 | Aragon              | <a href="https://www.cnbc.com/2020/03/14/spain-declares-state-of-emergency-due-to-coronavirus.html">https://www.cnbc.com/2020/03/14/spain-declares-state-of-emergency-due-to-coronavirus.html</a> |
| Ban of small gatherings | 2020-03-15 | 1.00 | Castille and Leon   | <a href="https://www.cnbc.com/2020/03/14/spain-declares-state-of-emergency-due-to-coronavirus.html">https://www.cnbc.com/2020/03/14/spain-declares-state-of-emergency-due-to-coronavirus.html</a> |
| Ban of small gatherings | 2020-03-15 | 1.00 | Valencian Community | <a href="https://www.cnbc.com/2020/03/14/spain-declares-state-of-emergency-due-to-coronavirus.html">https://www.cnbc.com/2020/03/14/spain-declares-state-of-emergency-due-to-coronavirus.html</a> |

| NPI            | Date       | Cumulative share | Region              | Source                                                                                                                                                                                                                                                                    |
|----------------|------------|------------------|---------------------|---------------------------------------------------------------------------------------------------------------------------------------------------------------------------------------------------------------------------------------------------------------------------|
| School closure | 2020-03-11 | 0.15             | La Rioja            | <a href="https://www.thestar.com.my/news/world/2020/03/10/spain039s-la-rioja-region-orders-schools-shutdown-as-coronavirus-spreads">https://www.thestar.com.my/news/world/2020/03/10/spain039s-la-rioja-region-orders-schools-shutdown-as-coronavirus-spreads</a>         |
| School closure | 2020-03-11 | 0.15             | Community of Madrid | <a href="https://english.elpais.com/society/2020-03-09/madrid-basque-city-close-schools-as-coronavirus-continues-spread-in-spain.html">https://english.elpais.com/society/2020-03-09/madrid-basque-city-close-schools-as-coronavirus-continues-spread-in-spain.html</a>   |
| School closure | 2020-03-13 | 0.46             | Galicia             | <a href="https://english.elpais.com/society/2020-03-12/basque-country-galicia-and-murcia-close-schools-in-bid-to-slow-coronavirus.html">https://english.elpais.com/society/2020-03-12/basque-country-galicia-and-murcia-close-schools-in-bid-to-slow-coronavirus.html</a> |
| School closure | 2020-03-13 | 0.46             | Basque Country      | <a href="https://english.elpais.com/society/2020-03-12/basque-country-galicia-and-murcia-close-schools-in-bid-to-slow-coronavirus.html">https://english.elpais.com/society/2020-03-12/basque-country-galicia-and-murcia-close-schools-in-bid-to-slow-coronavirus.html</a> |
| School closure | 2020-03-13 | 0.46             | Canary Islands      | <a href="https://english.elpais.com/society/2020-03-12/basque-country-galicia-and-murcia-close-schools-in-bid-to-slow-coronavirus.html">https://english.elpais.com/society/2020-03-12/basque-country-galicia-and-murcia-close-schools-in-bid-to-slow-coronavirus.html</a> |

|                |             |                         |                     |                                                                                                                                                                                                                                                                           |
|----------------|-------------|-------------------------|---------------------|---------------------------------------------------------------------------------------------------------------------------------------------------------------------------------------------------------------------------------------------------------------------------|
| School closure | 2020-03-13  | 0.46                    | Catalonia           | <a href="https://english.elpais.com/society/2020-03-12/basque-country-galicia-and-murcia-close-schools-in-bid-to-slow-coronavirus.html">https://english.elpais.com/society/2020-03-12/basque-country-galicia-and-murcia-close-schools-in-bid-to-slow-coronavirus.html</a> |
| School closure | 2020-03-16  | 1.00                    | Andalusia           | <a href="https://english.elpais.com/society/2020-03-12/basque-country-galicia-and-murcia-close-schools-in-bid-to-slow-coronavirus.html">https://english.elpais.com/society/2020-03-12/basque-country-galicia-and-murcia-close-schools-in-bid-to-slow-coronavirus.html</a> |
| School closure | 2020-03-16  | 1.00                    | Navarre             | <a href="https://english.elpais.com/society/2020-03-12/basque-country-galicia-and-murcia-close-schools-in-bid-to-slow-coronavirus.html">https://english.elpais.com/society/2020-03-12/basque-country-galicia-and-murcia-close-schools-in-bid-to-slow-coronavirus.html</a> |
| School closure | 2020-03-16  | 1.00                    | Extremadura         | <a href="https://english.elpais.com/society/2020-03-12/basque-country-galicia-and-murcia-close-schools-in-bid-to-slow-coronavirus.html">https://english.elpais.com/society/2020-03-12/basque-country-galicia-and-murcia-close-schools-in-bid-to-slow-coronavirus.html</a> |
| School closure | 2020-03-16  | 1.00                    | Castille-La Mancha  | <a href="https://english.elpais.com/society/2020-03-12/basque-country-galicia-and-murcia-close-schools-in-bid-to-slow-coronavirus.html">https://english.elpais.com/society/2020-03-12/basque-country-galicia-and-murcia-close-schools-in-bid-to-slow-coronavirus.html</a> |
| School closure | 2020-03-16  | 1.00                    | Castille and Leon   | <a href="https://english.elpais.com/society/2020-03-12/basque-country-galicia-and-murcia-close-schools-in-bid-to-slow-coronavirus.html">https://english.elpais.com/society/2020-03-12/basque-country-galicia-and-murcia-close-schools-in-bid-to-slow-coronavirus.html</a> |
| School closure | 2020-03-16  | 1.00                    | Cantabria           | <a href="https://english.elpais.com/society/2020-03-12/basque-country-galicia-and-murcia-close-schools-in-bid-to-slow-coronavirus.html">https://english.elpais.com/society/2020-03-12/basque-country-galicia-and-murcia-close-schools-in-bid-to-slow-coronavirus.html</a> |
| School closure | 2020-03-16  | 1.00                    | Balearic Islands    | <a href="https://english.elpais.com/society/2020-03-12/basque-country-galicia-and-murcia-close-schools-in-bid-to-slow-coronavirus.html">https://english.elpais.com/society/2020-03-12/basque-country-galicia-and-murcia-close-schools-in-bid-to-slow-coronavirus.html</a> |
| School closure | 2020-03-16  | 1.00                    | Asturias            | <a href="https://english.elpais.com/society/2020-03-12/basque-country-galicia-and-murcia-close-schools-in-bid-to-slow-coronavirus.html">https://english.elpais.com/society/2020-03-12/basque-country-galicia-and-murcia-close-schools-in-bid-to-slow-coronavirus.html</a> |
| School closure | 2020-03-16  | 1.00                    | Aragon              | <a href="https://english.elpais.com/society/2020-03-12/basque-country-galicia-and-murcia-close-schools-in-bid-to-slow-coronavirus.html">https://english.elpais.com/society/2020-03-12/basque-country-galicia-and-murcia-close-schools-in-bid-to-slow-coronavirus.html</a> |
| School closure | 2020-03-16  | 1.00                    | Region of Murcia    | <a href="https://english.elpais.com/society/2020-03-12/basque-country-galicia-and-murcia-close-schools-in-bid-to-slow-coronavirus.html">https://english.elpais.com/society/2020-03-12/basque-country-galicia-and-murcia-close-schools-in-bid-to-slow-coronavirus.html</a> |
| School closure | 2020-03-16  | 1.00                    | Valencian Community | <a href="https://english.elpais.com/society/2020-03-12/basque-country-galicia-and-murcia-close-schools-in-bid-to-slow-coronavirus.html">https://english.elpais.com/society/2020-03-12/basque-country-galicia-and-murcia-close-schools-in-bid-to-slow-coronavirus.html</a> |
| <b>NPI</b>     | <b>Date</b> | <b>Cumulative share</b> | <b>Region</b>       | <b>Source</b>                                                                                                                                                                                                                                                             |

|       |      |            |      |                     |                                                                                                                                                                                                                                                                                                             |
|-------|------|------------|------|---------------------|-------------------------------------------------------------------------------------------------------------------------------------------------------------------------------------------------------------------------------------------------------------------------------------------------------------|
| Venue | clo- | 2020-03-13 | 0.29 | Galicia             | <a href="https://www.nytimes.com/aponline/2020/03/14/world/europe/ap-eu-virus-outbreak-spain.html">https://www.nytimes.com/aponline/2020/03/14/world/europe/ap-eu-virus-outbreak-spain.html</a>                                                                                                             |
| Venue | clo- | 2020-03-13 | 0.29 | Cantabria           | <a href="https://www.eldiario.es/cantabria/ultima-hora/Cantabria-hosteleria-superficies-edificios-actividades_0_1005450439.html">https://www.eldiario.es/cantabria/ultima-hora/Cantabria-hosteleria-superficies-edificios-actividades_0_1005450439.html</a>                                                 |
| Venue | clo- | 2020-03-13 | 0.29 | Castille and Leon   | <a href="https://twitter.com/FranciscoIgea/status/1238571610468220929">https://twitter.com/FranciscoIgea/status/1238571610468220929</a>                                                                                                                                                                     |
| Venue | clo- | 2020-03-13 | 0.29 | Catalonia           | <a href="https://elpais.com/espana/catalunya/2020-03-13/cataluna-cierra-pistas-de-esqui-discotecas-y-areas-comerciales-que-no-sean-de-alimentacion.html">https://elpais.com/espana/catalunya/2020-03-13/cataluna-cierra-pistas-de-esqui-discotecas-y-areas-comerciales-que-no-sean-de-alimentacion.html</a> |
| Venue | clo- | 2020-03-14 | 0.56 | Valencian Community | <a href="https://english.elpais.com/society/2020-03-13/madrid-orders-restaurants-and-bars-to-close-from-saturday-onward-to-slow-coronavirus-spread.html">https://english.elpais.com/society/2020-03-13/madrid-orders-restaurants-and-bars-to-close-from-saturday-onward-to-slow-coronavirus-spread.html</a> |
| Venue | clo- | 2020-03-14 | 0.56 | Asturias            | <a href="https://cadenaser.com/emisora/2020/03/13/ser_gijon/1584138177_171951.html">https://cadenaser.com/emisora/2020/03/13/ser_gijon/1584138177_171951.html</a>                                                                                                                                           |
| Venue | clo- | 2020-03-14 | 0.56 | Community of Madrid | <a href="https://english.elpais.com/society/2020-03-13/madrid-orders-restaurants-and-bars-to-close-from-saturday-onward-to-slow-coronavirus-spread.html">https://english.elpais.com/society/2020-03-13/madrid-orders-restaurants-and-bars-to-close-from-saturday-onward-to-slow-coronavirus-spread.html</a> |
| Venue | clo- | 2020-03-15 | 1.00 | Navarre             | <a href="https://www.cnbc.com/2020/03/14/spain-declares-state-of-emergency-due-to-coronavirus.html">https://www.cnbc.com/2020/03/14/spain-declares-state-of-emergency-due-to-coronavirus.html</a>                                                                                                           |
| Venue | clo- | 2020-03-15 | 1.00 | La Rioja            | <a href="https://www.cnbc.com/2020/03/14/spain-declares-state-of-emergency-due-to-coronavirus.html">https://www.cnbc.com/2020/03/14/spain-declares-state-of-emergency-due-to-coronavirus.html</a>                                                                                                           |
| Venue | clo- | 2020-03-15 | 1.00 | Extremadura         | <a href="https://www.cnbc.com/2020/03/14/spain-declares-state-of-emergency-due-to-coronavirus.html">https://www.cnbc.com/2020/03/14/spain-declares-state-of-emergency-due-to-coronavirus.html</a>                                                                                                           |
| Venue | clo- | 2020-03-15 | 1.00 | Andalusia           | <a href="https://www.cnbc.com/2020/03/14/spain-declares-state-of-emergency-due-to-coronavirus.html">https://www.cnbc.com/2020/03/14/spain-declares-state-of-emergency-due-to-coronavirus.html</a>                                                                                                           |
| Venue | clo- | 2020-03-15 | 1.00 | Canary Islands      | <a href="https://www.cnbc.com/2020/03/14/spain-declares-state-of-emergency-due-to-coronavirus.html">https://www.cnbc.com/2020/03/14/spain-declares-state-of-emergency-due-to-coronavirus.html</a>                                                                                                           |

|            |      |             |                   |                     |                                                                                                                                                                                                   |
|------------|------|-------------|-------------------|---------------------|---------------------------------------------------------------------------------------------------------------------------------------------------------------------------------------------------|
| Venue      | clo- | 2020-03-15  | 1.00              | Basque Country      | <a href="https://www.cnbc.com/2020/03/14/spain-declares-state-of-emergency-due-to-coronavirus.html">https://www.cnbc.com/2020/03/14/spain-declares-state-of-emergency-due-to-coronavirus.html</a> |
| Venue      | clo- | 2020-03-15  | 1.00              | Balearic Islands    | <a href="https://www.cnbc.com/2020/03/14/spain-declares-state-of-emergency-due-to-coronavirus.html">https://www.cnbc.com/2020/03/14/spain-declares-state-of-emergency-due-to-coronavirus.html</a> |
| Venue      | clo- | 2020-03-15  | 1.00              | Aragon              | <a href="https://www.cnbc.com/2020/03/14/spain-declares-state-of-emergency-due-to-coronavirus.html">https://www.cnbc.com/2020/03/14/spain-declares-state-of-emergency-due-to-coronavirus.html</a> |
| Venue      | clo- | 2020-03-15  | 1.00              | Region of Murcia    | <a href="https://www.cnbc.com/2020/03/14/spain-declares-state-of-emergency-due-to-coronavirus.html">https://www.cnbc.com/2020/03/14/spain-declares-state-of-emergency-due-to-coronavirus.html</a> |
| Venue      | clo- | 2020-03-15  | 1.00              | Castille-La Mancha  | <a href="https://www.cnbc.com/2020/03/14/spain-declares-state-of-emergency-due-to-coronavirus.html">https://www.cnbc.com/2020/03/14/spain-declares-state-of-emergency-due-to-coronavirus.html</a> |
| <b>NPI</b> |      | <b>Date</b> | <b>Cumulative</b> | <b>Region</b>       | <b>Source</b>                                                                                                                                                                                     |
|            |      |             | <b>share</b>      |                     |                                                                                                                                                                                                   |
| Lockdown   |      | 2020-03-15  | 1.00              | Andalusia           | <a href="https://www.cnbc.com/2020/03/14/spain-declares-state-of-emergency-due-to-coronavirus.html">https://www.cnbc.com/2020/03/14/spain-declares-state-of-emergency-due-to-coronavirus.html</a> |
| Lockdown   |      | 2020-03-15  | 1.00              | Navarre             | <a href="https://www.cnbc.com/2020/03/14/spain-declares-state-of-emergency-due-to-coronavirus.html">https://www.cnbc.com/2020/03/14/spain-declares-state-of-emergency-due-to-coronavirus.html</a> |
| Lockdown   |      | 2020-03-15  | 1.00              | La Rioja            | <a href="https://www.cnbc.com/2020/03/14/spain-declares-state-of-emergency-due-to-coronavirus.html">https://www.cnbc.com/2020/03/14/spain-declares-state-of-emergency-due-to-coronavirus.html</a> |
| Lockdown   |      | 2020-03-15  | 1.00              | Galicia             | <a href="https://www.cnbc.com/2020/03/14/spain-declares-state-of-emergency-due-to-coronavirus.html">https://www.cnbc.com/2020/03/14/spain-declares-state-of-emergency-due-to-coronavirus.html</a> |
| Lockdown   |      | 2020-03-15  | 1.00              | Extremadura         | <a href="https://www.cnbc.com/2020/03/14/spain-declares-state-of-emergency-due-to-coronavirus.html">https://www.cnbc.com/2020/03/14/spain-declares-state-of-emergency-due-to-coronavirus.html</a> |
| Lockdown   |      | 2020-03-15  | 1.00              | Community of Madrid | <a href="https://www.cnbc.com/2020/03/14/spain-declares-state-of-emergency-due-to-coronavirus.html">https://www.cnbc.com/2020/03/14/spain-declares-state-of-emergency-due-to-coronavirus.html</a> |

|          |            |      |                     |                                                                                                                                                                                                   |
|----------|------------|------|---------------------|---------------------------------------------------------------------------------------------------------------------------------------------------------------------------------------------------|
| Lockdown | 2020-03-15 | 1.00 | Catalonia           | <a href="https://www.cnbc.com/2020/03/14/spain-declares-state-of-emergency-due-to-coronavirus.html">https://www.cnbc.com/2020/03/14/spain-declares-state-of-emergency-due-to-coronavirus.html</a> |
| Lockdown | 2020-03-15 | 1.00 | Region of Murcia    | <a href="https://www.cnbc.com/2020/03/14/spain-declares-state-of-emergency-due-to-coronavirus.html">https://www.cnbc.com/2020/03/14/spain-declares-state-of-emergency-due-to-coronavirus.html</a> |
| Lockdown | 2020-03-15 | 1.00 | Castille-La Mancha  | <a href="https://www.cnbc.com/2020/03/14/spain-declares-state-of-emergency-due-to-coronavirus.html">https://www.cnbc.com/2020/03/14/spain-declares-state-of-emergency-due-to-coronavirus.html</a> |
| Lockdown | 2020-03-15 | 1.00 | Cantabria           | <a href="https://www.cnbc.com/2020/03/14/spain-declares-state-of-emergency-due-to-coronavirus.html">https://www.cnbc.com/2020/03/14/spain-declares-state-of-emergency-due-to-coronavirus.html</a> |
| Lockdown | 2020-03-15 | 1.00 | Canary Islands      | <a href="https://www.cnbc.com/2020/03/14/spain-declares-state-of-emergency-due-to-coronavirus.html">https://www.cnbc.com/2020/03/14/spain-declares-state-of-emergency-due-to-coronavirus.html</a> |
| Lockdown | 2020-03-15 | 1.00 | Basque Country      | <a href="https://www.cnbc.com/2020/03/14/spain-declares-state-of-emergency-due-to-coronavirus.html">https://www.cnbc.com/2020/03/14/spain-declares-state-of-emergency-due-to-coronavirus.html</a> |
| Lockdown | 2020-03-15 | 1.00 | Balearic Islands    | <a href="https://www.cnbc.com/2020/03/14/spain-declares-state-of-emergency-due-to-coronavirus.html">https://www.cnbc.com/2020/03/14/spain-declares-state-of-emergency-due-to-coronavirus.html</a> |
| Lockdown | 2020-03-15 | 1.00 | Asturias            | <a href="https://www.cnbc.com/2020/03/14/spain-declares-state-of-emergency-due-to-coronavirus.html">https://www.cnbc.com/2020/03/14/spain-declares-state-of-emergency-due-to-coronavirus.html</a> |
| Lockdown | 2020-03-15 | 1.00 | Aragon              | <a href="https://www.cnbc.com/2020/03/14/spain-declares-state-of-emergency-due-to-coronavirus.html">https://www.cnbc.com/2020/03/14/spain-declares-state-of-emergency-due-to-coronavirus.html</a> |
| Lockdown | 2020-03-15 | 1.00 | Castille and Leon   | <a href="https://www.cnbc.com/2020/03/14/spain-declares-state-of-emergency-due-to-coronavirus.html">https://www.cnbc.com/2020/03/14/spain-declares-state-of-emergency-due-to-coronavirus.html</a> |
| Lockdown | 2020-03-15 | 1.00 | Valencian Community | <a href="https://www.cnbc.com/2020/03/14/spain-declares-state-of-emergency-due-to-coronavirus.html">https://www.cnbc.com/2020/03/14/spain-declares-state-of-emergency-due-to-coronavirus.html</a> |

---

| NPI | Date | CumulativeRegion share | Source |
|-----|------|------------------------|--------|
|-----|------|------------------------|--------|

---

|                      |            |      |                     |                                                                                                                                                                                                                                                                                                                         |
|----------------------|------------|------|---------------------|-------------------------------------------------------------------------------------------------------------------------------------------------------------------------------------------------------------------------------------------------------------------------------------------------------------------------|
| Work-from-home order | 2020-03-30 | 1.00 | Andalusia           | <a href="https://elpais.com/espana/2020-03-28/el-gobierno-amplia-el-confinamiento-los-trabajadores-de-actividades-no-esenciales-deberan-quedarse-en-casa.html">https://elpais.com/espana/2020-03-28/el-gobierno-amplia-el-confinamiento-los-trabajadores-de-actividades-no-esenciales-deberan-quedarse-en-casa.html</a> |
| Work-from-home order | 2020-03-30 | 1.00 | Navarre             | <a href="https://elpais.com/espana/2020-03-28/el-gobierno-amplia-el-confinamiento-los-trabajadores-de-actividades-no-esenciales-deberan-quedarse-en-casa.html">https://elpais.com/espana/2020-03-28/el-gobierno-amplia-el-confinamiento-los-trabajadores-de-actividades-no-esenciales-deberan-quedarse-en-casa.html</a> |
| Work-from-home order | 2020-03-30 | 1.00 | La Rioja            | <a href="https://elpais.com/espana/2020-03-28/el-gobierno-amplia-el-confinamiento-los-trabajadores-de-actividades-no-esenciales-deberan-quedarse-en-casa.html">https://elpais.com/espana/2020-03-28/el-gobierno-amplia-el-confinamiento-los-trabajadores-de-actividades-no-esenciales-deberan-quedarse-en-casa.html</a> |
| Work-from-home order | 2020-03-30 | 1.00 | Galicia             | <a href="https://elpais.com/espana/2020-03-28/el-gobierno-amplia-el-confinamiento-los-trabajadores-de-actividades-no-esenciales-deberan-quedarse-en-casa.html">https://elpais.com/espana/2020-03-28/el-gobierno-amplia-el-confinamiento-los-trabajadores-de-actividades-no-esenciales-deberan-quedarse-en-casa.html</a> |
| Work-from-home order | 2020-03-30 | 1.00 | Extremadura         | <a href="https://elpais.com/espana/2020-03-28/el-gobierno-amplia-el-confinamiento-los-trabajadores-de-actividades-no-esenciales-deberan-quedarse-en-casa.html">https://elpais.com/espana/2020-03-28/el-gobierno-amplia-el-confinamiento-los-trabajadores-de-actividades-no-esenciales-deberan-quedarse-en-casa.html</a> |
| Work-from-home order | 2020-03-30 | 1.00 | Community of Madrid | <a href="https://elpais.com/espana/2020-03-28/el-gobierno-amplia-el-confinamiento-los-trabajadores-de-actividades-no-esenciales-deberan-quedarse-en-casa.html">https://elpais.com/espana/2020-03-28/el-gobierno-amplia-el-confinamiento-los-trabajadores-de-actividades-no-esenciales-deberan-quedarse-en-casa.html</a> |
| Work-from-home order | 2020-03-30 | 1.00 | Catalonia           | <a href="https://elpais.com/espana/2020-03-28/el-gobierno-amplia-el-confinamiento-los-trabajadores-de-actividades-no-esenciales-deberan-quedarse-en-casa.html">https://elpais.com/espana/2020-03-28/el-gobierno-amplia-el-confinamiento-los-trabajadores-de-actividades-no-esenciales-deberan-quedarse-en-casa.html</a> |
| Work-from-home order | 2020-03-30 | 1.00 | Region of Murcia    | <a href="https://elpais.com/espana/2020-03-28/el-gobierno-amplia-el-confinamiento-los-trabajadores-de-actividades-no-esenciales-deberan-quedarse-en-casa.html">https://elpais.com/espana/2020-03-28/el-gobierno-amplia-el-confinamiento-los-trabajadores-de-actividades-no-esenciales-deberan-quedarse-en-casa.html</a> |

|                      |            |      |                    |                                                                                                                                                                                                                                                                                                                         |
|----------------------|------------|------|--------------------|-------------------------------------------------------------------------------------------------------------------------------------------------------------------------------------------------------------------------------------------------------------------------------------------------------------------------|
| Work-from-home order | 2020-03-30 | 1.00 | Castille-La Mancha | <a href="https://elpais.com/espana/2020-03-28/el-gobierno-amplia-el-confinamiento-los-trabajadores-de-actividades-no-esenciales-deberan-quedarse-en-casa.html">https://elpais.com/espana/2020-03-28/el-gobierno-amplia-el-confinamiento-los-trabajadores-de-actividades-no-esenciales-deberan-quedarse-en-casa.html</a> |
| Work-from-home order | 2020-03-30 | 1.00 | Cantabria          | <a href="https://elpais.com/espana/2020-03-28/el-gobierno-amplia-el-confinamiento-los-trabajadores-de-actividades-no-esenciales-deberan-quedarse-en-casa.html">https://elpais.com/espana/2020-03-28/el-gobierno-amplia-el-confinamiento-los-trabajadores-de-actividades-no-esenciales-deberan-quedarse-en-casa.html</a> |
| Work-from-home order | 2020-03-30 | 1.00 | Canary Islands     | <a href="https://elpais.com/espana/2020-03-28/el-gobierno-amplia-el-confinamiento-los-trabajadores-de-actividades-no-esenciales-deberan-quedarse-en-casa.html">https://elpais.com/espana/2020-03-28/el-gobierno-amplia-el-confinamiento-los-trabajadores-de-actividades-no-esenciales-deberan-quedarse-en-casa.html</a> |
| Work-from-home order | 2020-03-30 | 1.00 | Basque Country     | <a href="https://elpais.com/espana/2020-03-28/el-gobierno-amplia-el-confinamiento-los-trabajadores-de-actividades-no-esenciales-deberan-quedarse-en-casa.html">https://elpais.com/espana/2020-03-28/el-gobierno-amplia-el-confinamiento-los-trabajadores-de-actividades-no-esenciales-deberan-quedarse-en-casa.html</a> |
| Work-from-home order | 2020-03-30 | 1.00 | Balearic Islands   | <a href="https://elpais.com/espana/2020-03-28/el-gobierno-amplia-el-confinamiento-los-trabajadores-de-actividades-no-esenciales-deberan-quedarse-en-casa.html">https://elpais.com/espana/2020-03-28/el-gobierno-amplia-el-confinamiento-los-trabajadores-de-actividades-no-esenciales-deberan-quedarse-en-casa.html</a> |
| Work-from-home order | 2020-03-30 | 1.00 | Asturias           | <a href="https://elpais.com/espana/2020-03-28/el-gobierno-amplia-el-confinamiento-los-trabajadores-de-actividades-no-esenciales-deberan-quedarse-en-casa.html">https://elpais.com/espana/2020-03-28/el-gobierno-amplia-el-confinamiento-los-trabajadores-de-actividades-no-esenciales-deberan-quedarse-en-casa.html</a> |
| Work-from-home order | 2020-03-30 | 1.00 | Aragon             | <a href="https://elpais.com/espana/2020-03-28/el-gobierno-amplia-el-confinamiento-los-trabajadores-de-actividades-no-esenciales-deberan-quedarse-en-casa.html">https://elpais.com/espana/2020-03-28/el-gobierno-amplia-el-confinamiento-los-trabajadores-de-actividades-no-esenciales-deberan-quedarse-en-casa.html</a> |
| Work-from-home order | 2020-03-30 | 1.00 | Castille and Leon  | <a href="https://elpais.com/espana/2020-03-28/el-gobierno-amplia-el-confinamiento-los-trabajadores-de-actividades-no-esenciales-deberan-quedarse-en-casa.html">https://elpais.com/espana/2020-03-28/el-gobierno-amplia-el-confinamiento-los-trabajadores-de-actividades-no-esenciales-deberan-quedarse-en-casa.html</a> |

Work-from-home order      2020-03-30      1.00      Valencian Community      <https://elpais.com/espana/2020-03-28/el-gobierno-amplia-el-confinamiento-los-trabajadores-de-actividades-no-esenciales-deberan-quedarse-en-casa.html>

---

**Table 9.** Sources for policies implemented across different Spanish regions



| NPI                     | Date       | Cumulative Region share | Source                                                                                                                                                                                                                                                                                                                                                                                                                                                                                                                        |
|-------------------------|------------|-------------------------|-------------------------------------------------------------------------------------------------------------------------------------------------------------------------------------------------------------------------------------------------------------------------------------------------------------------------------------------------------------------------------------------------------------------------------------------------------------------------------------------------------------------------------|
| Ban of large gatherings | 2020-03-12 | 0.27                    | <a href="https://www.alberta.ca/release.cfm?xID=6980324A5B1B0-BC2C-40A8-A6AD9E30E3189425">https://www.alberta.ca/release.cfm?xID=6980324A5B1B0-BC2C-40A8-A6AD9E30E3189425</a>                                                                                                                                                                                                                                                                                                                                                 |
| Ban of large gatherings | 2020-03-12 | 0.27                    | <a href="https://news.gov.bc.ca/releases/2020HLTH0077-000484">https://news.gov.bc.ca/releases/2020HLTH0077-000484</a>                                                                                                                                                                                                                                                                                                                                                                                                         |
| Ban of large gatherings | 2020-03-12 | 0.27                    | <a href="https://www2.gnb.ca/content/gnb/en/news/news_release.2020.03.0114.html">https://www2.gnb.ca/content/gnb/en/news/news_release.2020.03.0114.html</a>                                                                                                                                                                                                                                                                                                                                                                   |
| Ban of large gatherings | 2020-03-13 | 0.71                    | <a href="https://news.gov.mb.ca/news/index.html?item=46933&amp;posted=2020-03-13">https://news.gov.mb.ca/news/index.html?item=46933&amp;posted=2020-03-13</a>                                                                                                                                                                                                                                                                                                                                                                 |
| Ban of large gatherings | 2020-03-13 | 0.71                    | <a href="https://www.gov.nl.ca/releases/2020/tcii/0313n04/">https://www.gov.nl.ca/releases/2020/tcii/0313n04/</a>                                                                                                                                                                                                                                                                                                                                                                                                             |
| Ban of large gatherings | 2020-03-13 | 0.71                    | <a href="https://www.gov.nu.ca/health/news/government-nunavut-response-covid-19">https://www.gov.nu.ca/health/news/government-nunavut-response-covid-19</a>                                                                                                                                                                                                                                                                                                                                                                   |
| Ban of large gatherings | 2020-03-13 | 0.71                    | <a href="https://news.ontario.ca/mtc/en/2020/03/statement-from-minister-elliott-and-minister-macleod-on-the-2019-novel-coronavirus-covid-19-1.html">https://news.ontario.ca/mtc/en/2020/03/statement-from-minister-elliott-and-minister-macleod-on-the-2019-novel-coronavirus-covid-19-1.html</a>                                                                                                                                                                                                                             |
| Ban of large gatherings | 2020-03-14 | 0.94                    | <a href="http://www.fill-information.gouv.qc.ca/Pages/Article.aspx?lang=en&amp;motsCles=Covid&amp;listeThe=&amp;listeReg=&amp;listeDiff=&amp;type=&amp;dateDebut=2019-09-28&amp;dateFin=2020-03-28&amp;afficherResultats=oui&amp;Page=5&amp;idArticle=2803149905">http://www.fill-information.gouv.qc.ca/Pages/Article.aspx?lang=en&amp;motsCles=Covid&amp;listeThe=&amp;listeReg=&amp;listeDiff=&amp;type=&amp;dateDebut=2019-09-28&amp;dateFin=2020-03-28&amp;afficherResultats=oui&amp;Page=5&amp;idArticle=2803149905</a> |
| Ban of large gatherings | 2020-03-15 | 0.96                    | <a href="https://novascotia.ca/news/release/?id=20200315002">https://novascotia.ca/news/release/?id=20200315002</a>                                                                                                                                                                                                                                                                                                                                                                                                           |
| Ban of large gatherings | 2020-03-16 | 1.00                    | <a href="https://www.princeedwardisland.ca/en/news/premier-announces-initial-financial-support-declares-public-health-emergency">https://www.princeedwardisland.ca/en/news/premier-announces-initial-financial-support-declares-public-health-emergency</a>                                                                                                                                                                                                                                                                   |
| Ban of large gatherings | 2020-03-16 | 1.00                    | <a href="https://www.saskatchewan.ca/government/news-and-media/2020/march/13/further-measures-for-covid-19">https://www.saskatchewan.ca/government/news-and-media/2020/march/13/further-measures-for-covid-19</a>                                                                                                                                                                                                                                                                                                             |

|                         |             |                         |                       |                                                                                                                                                                                                                                                                                                                                                                                                                                                                                                                             |
|-------------------------|-------------|-------------------------|-----------------------|-----------------------------------------------------------------------------------------------------------------------------------------------------------------------------------------------------------------------------------------------------------------------------------------------------------------------------------------------------------------------------------------------------------------------------------------------------------------------------------------------------------------------------|
| Ban of large gatherings | 2020-03-16  | 1.00                    | Yukon                 | <a href="https://yukon.ca/en/news/chief-medical-officer-health-recommends-broad-new-measures-yukon">https://yukon.ca/en/news/chief-medical-officer-health-recommends-broad-new-measures-yukon</a>                                                                                                                                                                                                                                                                                                                           |
| Ban of large gatherings | 2020-03-22  | 1.00                    | Northwest Territories | <a href="https://www.hss.gov.nt.ca/en/newsroom/all-gatherings-are-advised-cancel-effective-immediately">https://www.hss.gov.nt.ca/en/newsroom/all-gatherings-are-advised-cancel-effective-immediately</a>                                                                                                                                                                                                                                                                                                                   |
| <b>NPI</b>              | <b>Date</b> | <b>Cumulative share</b> | <b>Region</b>         | <b>Source</b>                                                                                                                                                                                                                                                                                                                                                                                                                                                                                                               |
| Ban of small gatherings | 2020-03-16  | 0.00                    | Prince Edward Island  | <a href="https://www.princeedwardisland.ca/en/news/premier-announces-initial-financial-support-declares-public-health-emergency">https://www.princeedwardisland.ca/en/news/premier-announces-initial-financial-support-declares-public-health-emergency</a>                                                                                                                                                                                                                                                                 |
| Ban of small gatherings | 2020-03-19  | 0.02                    | New Brunswick         | <a href="https://www2.gnb.ca/content/gnb/en/news/news_release.2020.03.0139.html">https://www2.gnb.ca/content/gnb/en/news/news_release.2020.03.0139.html</a>                                                                                                                                                                                                                                                                                                                                                                 |
| Ban of small gatherings | 2020-03-20  | 0.06                    | Saskatchewan          | <a href="https://www.saskatchewan.ca/government/news-and-media/2020/march/20/covid-19-update-march-20">https://www.saskatchewan.ca/government/news-and-media/2020/march/20/covid-19-update-march-20</a>                                                                                                                                                                                                                                                                                                                     |
| Ban of small gatherings | 2020-03-21  | 0.28                    | Quebec                | <a href="http://www.fil-information.gouv.qc.ca/Pages/Article.aspx?lang=en&amp;motsCles=Covid&amp;listeThe=&amp;listeReg=&amp;listeDiff=&amp;type=&amp;dateDebut=2019-09-28&amp;dateFin=2020-03-28&amp;afficherResultats=oui&amp;Page=2&amp;idArticle=2803211636">http://www.fil-information.gouv.qc.ca/Pages/Article.aspx?lang=en&amp;motsCles=Covid&amp;listeThe=&amp;listeReg=&amp;listeDiff=&amp;type=&amp;dateDebut=2019-09-28&amp;dateFin=2020-03-28&amp;afficherResultats=oui&amp;Page=2&amp;idArticle=2803211636</a> |
| Ban of small gatherings | 2020-03-22  | 0.31                    | Nova Scotia           | <a href="https://dailyhive.com/vancouver/nova-scotia-coronavirus-state-of-emergency">https://dailyhive.com/vancouver/nova-scotia-coronavirus-state-of-emergency</a>                                                                                                                                                                                                                                                                                                                                                         |
| Ban of small gatherings | 2020-03-22  | 0.31                    | Yukon                 | <a href="https://yukon.ca/en/news/yukons-chief-medical-officer-health-provides-update-covid-19-0">https://yukon.ca/en/news/yukons-chief-medical-officer-health-provides-update-covid-19-0</a>                                                                                                                                                                                                                                                                                                                               |
| Ban of small gatherings | 2020-03-24  | 0.31                    | Nunavut               | <a href="https://www.gov.nu.ca/health/news/chief-public-health-officer-orders-prohibition-travel-nunavut-limited-exceptions">https://www.gov.nu.ca/health/news/chief-public-health-officer-orders-prohibition-travel-nunavut-limited-exceptions</a>                                                                                                                                                                                                                                                                         |
| Ban of small gatherings | 2020-03-27  | 0.43                    | Alberta               | <a href="https://www.cbc.ca/news/canada/edmonton/alberta-covid-19-coronavirus-deena-hinshaw-1.5512445">https://www.cbc.ca/news/canada/edmonton/alberta-covid-19-coronavirus-deena-hinshaw-1.5512445</a>                                                                                                                                                                                                                                                                                                                     |
| Ban of small gatherings | 2020-03-28  | 0.81                    | Ontario               | <a href="https://globalnews.ca/news/6746181/ontario-ban-gatherings/">https://globalnews.ca/news/6746181/ontario-ban-gatherings/</a>                                                                                                                                                                                                                                                                                                                                                                                         |

|                         |             |                         |                           |     |                                                                                                                                                                                                                                                                                                                                                                                                                                                                                                                           |
|-------------------------|-------------|-------------------------|---------------------------|-----|---------------------------------------------------------------------------------------------------------------------------------------------------------------------------------------------------------------------------------------------------------------------------------------------------------------------------------------------------------------------------------------------------------------------------------------------------------------------------------------------------------------------------|
| Ban of small gatherings | 2020-03-31  | 0.83                    | Newfoundland and Labrador | and | <a href="https://www.gov.nl.ca/covid-19/faqs/">https://www.gov.nl.ca/covid-19/faqs/</a>                                                                                                                                                                                                                                                                                                                                                                                                                                   |
| Ban of small gatherings | 2020-04-01  | 0.86                    | Manitoba                  |     | <a href="https://news.gov.mb.ca/news/index.html?item=47337&amp;posted=2020-03-30">https://news.gov.mb.ca/news/index.html?item=47337&amp;posted=2020-03-30</a>                                                                                                                                                                                                                                                                                                                                                             |
| Ban of small gatherings | 2020-04-11  | 0.87                    | Northwest Territories     |     | <a href="https://www.gov.nt.ca/en/newsroom/two-new-orders-nwt-chief-public-health-officer-strengthen-response-covid-19-pandemic">https://www.gov.nt.ca/en/newsroom/two-new-orders-nwt-chief-public-health-officer-strengthen-response-covid-19-pandemic</a>                                                                                                                                                                                                                                                               |
| <b>NPI</b>              | <b>Date</b> | <b>Cumulative share</b> | <b>Region</b>             |     | <b>Source</b>                                                                                                                                                                                                                                                                                                                                                                                                                                                                                                             |
| School closure          | 2020-03-13  | 0.02                    | New Brunswick             |     | <a href="https://www2.gnb.ca/content/gnb/en/news/news_release.2020.03.0117.html">https://www2.gnb.ca/content/gnb/en/news/news_release.2020.03.0117.html</a>                                                                                                                                                                                                                                                                                                                                                               |
| School closure          | 2020-03-14  | 0.25                    | Quebec                    |     | <a href="http://www.fil-information.gouv.qc.ca/Pages/Article.aspx?lang=en&amp;motsCles=Covid&amp;listeThe=&amp;listeReg=&amp;listeDiff=&amp;type=&amp;dateDebut=2019-09-28&amp;dateFin=2020-03-28&amp;afficheResultats=oui&amp;Page=6&amp;idArticle=2803137507">http://www.fil-information.gouv.qc.ca/Pages/Article.aspx?lang=en&amp;motsCles=Covid&amp;listeThe=&amp;listeReg=&amp;listeDiff=&amp;type=&amp;dateDebut=2019-09-28&amp;dateFin=2020-03-28&amp;afficheResultats=oui&amp;Page=6&amp;idArticle=2803137507</a> |
| School closure          | 2020-03-15  | 0.36                    | Alberta                   |     | <a href="https://www.alberta.ca/release.cfm?xID=69818C355F188-C2A3-F5C6-875A2A33929D5C05">https://www.alberta.ca/release.cfm?xID=69818C355F188-C2A3-F5C6-875A2A33929D5C05</a>                                                                                                                                                                                                                                                                                                                                             |
| School closure          | 2020-03-16  | 0.80                    | Newfoundland and Labrador | and | <a href="https://www.gov.nl.ca/releases/2020/eecd/0316n04/">https://www.gov.nl.ca/releases/2020/eecd/0316n04/</a>                                                                                                                                                                                                                                                                                                                                                                                                         |
| School closure          | 2020-03-16  | 0.80                    | Northwest Territories     |     | <a href="https://cabinradio.ca/32133/news/education/nwt-tells-schools-to-close-until-after-easter-daycares-unaffected/">https://cabinradio.ca/32133/news/education/nwt-tells-schools-to-close-until-after-easter-daycares-unaffected/</a>                                                                                                                                                                                                                                                                                 |
| School closure          | 2020-03-16  | 0.80                    | Ontario                   |     | <a href="https://news.ontario.ca/maesd/en/2020/03/statement-from-minister-elliott-and-minister-romano-on-the-2019-novel-coronavirus-covid-19.html">https://news.ontario.ca/maesd/en/2020/03/statement-from-minister-elliott-and-minister-romano-on-the-2019-novel-coronavirus-covid-19.html</a>                                                                                                                                                                                                                           |
| School closure          | 2020-03-16  | 0.80                    | Saskatchewan              |     | <a href="https://www.saskatchewan.ca/government/news-and-media/2020/march/16/class-suspensions">https://www.saskatchewan.ca/government/news-and-media/2020/march/16/class-suspensions</a>                                                                                                                                                                                                                                                                                                                                 |
| School closure          | 2020-03-17  | 0.96                    | British Columbia          |     | <a href="https://news.gov.bc.ca/releases/2020EMBC0014-000552">https://news.gov.bc.ca/releases/2020EMBC0014-000552</a>                                                                                                                                                                                                                                                                                                                                                                                                     |

|                |            |      |                      |                                                                                                                                                                                                                                 |
|----------------|------------|------|----------------------|---------------------------------------------------------------------------------------------------------------------------------------------------------------------------------------------------------------------------------|
| School closure | 2020-03-17 | 0.96 | Nova Scotia          | <a href="https://novascotia.ca/news/release/?id=20200315002">https://novascotia.ca/news/release/?id=20200315002</a>                                                                                                             |
| School closure | 2020-03-17 | 0.96 | Nunavut              | <a href="https://www.gov.nu.ca/health/news/temporary-nunavut-wide-school-and-daycare-closures-precaution-covid-19">https://www.gov.nu.ca/health/news/temporary-nunavut-wide-school-and-daycare-closures-precaution-covid-19</a> |
| School closure | 2020-03-17 | 0.96 | Prince Edward Island | <a href="https://www.princeedwardisland.ca/en/news/province-announces-covid-19-related-closures">https://www.princeedwardisland.ca/en/news/province-announces-covid-19-related-closures</a>                                     |
| School closure | 2020-03-18 | 0.96 | Yukon                | <a href="https://yukon.ca/en/news/chief-medical-officer-health-declares-public-health-emergency">https://yukon.ca/en/news/chief-medical-officer-health-declares-public-health-emergency</a>                                     |
| School closure | 2020-03-23 | 1.00 | Manitoba             | <a href="https://news.gov.mb.ca/news/index.html?item=46936&amp;posted=2020-03-14">https://news.gov.mb.ca/news/index.html?item=46936&amp;posted=2020-03-14</a>                                                                   |

| <b>NPI</b> | <b>Date</b> | <b>Cumulative share</b> | <b>Region</b>        | <b>Source</b>                                                                                                                                                                                                                                                                                                                                                                                                                                                                                                               |
|------------|-------------|-------------------------|----------------------|-----------------------------------------------------------------------------------------------------------------------------------------------------------------------------------------------------------------------------------------------------------------------------------------------------------------------------------------------------------------------------------------------------------------------------------------------------------------------------------------------------------------------------|
| Venue sure | 2020-03-15  | 0.23                    | Quebec               | <a href="http://www.fil-information.gouv.qc.ca/Pages/Article.aspx?lang=en&amp;motsCles=Covid&amp;listeThe=&amp;listeReg=&amp;listeDiff=&amp;type=&amp;dateDebut=2019-09-28&amp;dateFin=2020-03-28&amp;afficherResultats=oui&amp;Page=5&amp;idArticle=2803159403">http://www.fil-information.gouv.qc.ca/Pages/Article.aspx?lang=en&amp;motsCles=Covid&amp;listeThe=&amp;listeReg=&amp;listeDiff=&amp;type=&amp;dateDebut=2019-09-28&amp;dateFin=2020-03-28&amp;afficherResultats=oui&amp;Page=5&amp;idArticle=2803159403</a> |
| Venue sure | 2020-03-16  | 0.61                    | Ontario              | <a href="https://news.ontario.ca/mohltc/en/2020/03/enhanced-measures-to-protect-ontarians-from-covid-19.html">https://news.ontario.ca/mohltc/en/2020/03/enhanced-measures-to-protect-ontarians-from-covid-19.html</a>                                                                                                                                                                                                                                                                                                       |
| Venue sure | 2020-03-17  | 0.89                    | Alberta              | <a href="https://www.alberta.ca/release.cfm?xID=69828242A5FFC-D75A-C83E-690D8028C0C4E09F">https://www.alberta.ca/release.cfm?xID=69828242A5FFC-D75A-C83E-690D8028C0C4E09F</a>                                                                                                                                                                                                                                                                                                                                               |
| Venue sure | 2020-03-17  | 0.89                    | British Columbia     | <a href="https://news.gov.bc.ca/releases/2020EMBC0014-000552">https://news.gov.bc.ca/releases/2020EMBC0014-000552</a>                                                                                                                                                                                                                                                                                                                                                                                                       |
| Venue sure | 2020-03-17  | 0.89                    | New Brunswick        | <a href="https://www2.gnb.ca/content/gnb/en/news/news_release.2020.03.0127.html">https://www2.gnb.ca/content/gnb/en/news/news_release.2020.03.0127.html</a>                                                                                                                                                                                                                                                                                                                                                                 |
| Venue sure | 2020-03-17  | 0.89                    | Prince Edward Island | <a href="https://www.princeedwardisland.ca/en/news/chief-public-health-officer-urges-islanders-work-together-reduce-spread-covid-19">https://www.princeedwardisland.ca/en/news/chief-public-health-officer-urges-islanders-work-together-reduce-spread-covid-19</a>                                                                                                                                                                                                                                                         |

|       |      |            |      |                           |                                                                                                                                                                                                           |
|-------|------|------------|------|---------------------------|-----------------------------------------------------------------------------------------------------------------------------------------------------------------------------------------------------------|
| Venue | clo- | 2020-03-19 | 0.92 | Nova Scotia               | <a href="https://novascotia.ca/news/release/?id=20200317005">https://novascotia.ca/news/release/?id=20200317005</a>                                                                                       |
| sure  |      |            |      |                           |                                                                                                                                                                                                           |
| Venue | clo- | 2020-03-20 | 0.95 | Nunavut                   | <a href="https://www.gov.nu.ca/health/news/minister-health-declares-public-health-emergency">https://www.gov.nu.ca/health/news/minister-health-declares-public-health-emergency</a>                       |
| sure  |      |            |      |                           |                                                                                                                                                                                                           |
| Venue | clo- | 2020-03-20 | 0.95 | Saskatchewan              | <a href="https://www.saskatchewan.ca/government/news-and-media/2020/march/20/covid-19-update-march-20">https://www.saskatchewan.ca/government/news-and-media/2020/march/20/covid-19-update-march-20</a>   |
| sure  |      |            |      |                           |                                                                                                                                                                                                           |
| Venue | clo- | 2020-03-22 | 0.95 | Northwest Territories     | <a href="https://www.hss.gov.nt.ca/en/newsroom/all-gatherings-are-advised-cancel-effective-immediately">https://www.hss.gov.nt.ca/en/newsroom/all-gatherings-are-advised-cancel-effective-immediately</a> |
| sure  |      |            |      |                           |                                                                                                                                                                                                           |
| Venue | clo- | 2020-03-23 | 0.96 | Newfoundland and Labrador | <a href="https://www.gov.nl.ca/covid-19/">https://www.gov.nl.ca/covid-19/</a>                                                                                                                             |
| sure  |      |            |      |                           |                                                                                                                                                                                                           |
| Venue | clo- | 2020-03-25 | 0.96 | Yukon                     | <a href="https://yukon.ca/en/news/yukons-chief-medical-officer-health-provides-update-covid-19-0">https://yukon.ca/en/news/yukons-chief-medical-officer-health-provides-update-covid-19-0</a>             |
| sure  |      |            |      |                           |                                                                                                                                                                                                           |
| Venue | clo- | 2020-04-01 | 1.00 | Manitoba                  | <a href="https://news.gov.mb.ca/news/index.html?item=47337&amp;posted=2020-03-30">https://news.gov.mb.ca/news/index.html?item=47337&amp;posted=2020-03-30</a>                                             |
| sure  |      |            |      |                           |                                                                                                                                                                                                           |

---

| <b>NPI</b> | <b>Date</b> | <b>Cumulative Region share</b> | <b>Source</b>                                                                                                                                                                                                     |
|------------|-------------|--------------------------------|-------------------------------------------------------------------------------------------------------------------------------------------------------------------------------------------------------------------|
| Lockdown   | 2020-03-29  | 0.02                           | <a href="https://www2.gnb.ca/content/gnb/en/news/news_release.2020.03.0164.html">https://www2.gnb.ca/content/gnb/en/news/news_release.2020.03.0164.html</a>                                                       |
| Lockdown   | 2020-03-30  | 0.41                           | <a href="https://news.ontario.ca/mohltc/en/2020/03/statement-from-the-chief-medical-officer-of-health.html">https://news.ontario.ca/mohltc/en/2020/03/statement-from-the-chief-medical-officer-of-health.html</a> |

---

| <b>NPI</b>           | <b>Date</b> | <b>Cumulative Region share</b> | <b>Source</b>                                                                                                                                                                                                                                                         |
|----------------------|-------------|--------------------------------|-----------------------------------------------------------------------------------------------------------------------------------------------------------------------------------------------------------------------------------------------------------------------|
| Work-from-home order | 2020-03-24  | 0.39                           | <a href="https://news.ontario.ca/opo/en/2020/03/ontario-closing-at-risk-workplaces-to-protect-health-and-safety.html">https://news.ontario.ca/opo/en/2020/03/ontario-closing-at-risk-workplaces-to-protect-health-and-safety.html</a>                                 |
| Work-from-home order | 2020-03-27  | 0.39                           | <a href="https://www.princeedwardisland.ca/en/news/prince-edward-island-extends-closures-for-schools-daycares-non-essential-services">https://www.princeedwardisland.ca/en/news/prince-edward-island-extends-closures-for-schools-daycares-non-essential-services</a> |

Work-from- 2020-04-01 0.43 Manitoba <https://news.gov.mb.ca/news/index.html?item=47337&posted=2020-03-30>

home order

---

**Table 10.** Sources for policies implemented across different Canadian regions

| <b>NPI</b>              | <b>Date</b> | <b>CumulativeRegion<br/>share</b> | <b>Source</b>                                                                                                                                                                                                                                                             |
|-------------------------|-------------|-----------------------------------|---------------------------------------------------------------------------------------------------------------------------------------------------------------------------------------------------------------------------------------------------------------------------|
| Ban of large gatherings | 2020-03-16  | 1.00                              | <a href="https://www.watoday.com.au/politics/federal/effective-ban-on-non-essential-mass-gatherings-of-500-people-20200313-p549u5.html">https://www.watoday.com.au/politics/federal/effective-ban-on-non-essential-mass-gatherings-of-500-people-20200313-p549u5.html</a> |
| Ban of large gatherings | 2020-03-16  | 1.00                              | <a href="https://www.watoday.com.au/politics/federal/effective-ban-on-non-essential-mass-gatherings-of-500-people-20200313-p549u5.html">https://www.watoday.com.au/politics/federal/effective-ban-on-non-essential-mass-gatherings-of-500-people-20200313-p549u5.html</a> |
| Ban of large gatherings | 2020-03-16  | 1.00                              | <a href="https://www.watoday.com.au/politics/federal/effective-ban-on-non-essential-mass-gatherings-of-500-people-20200313-p549u5.html">https://www.watoday.com.au/politics/federal/effective-ban-on-non-essential-mass-gatherings-of-500-people-20200313-p549u5.html</a> |
| Ban of large gatherings | 2020-03-16  | 1.00                              | <a href="https://www.watoday.com.au/politics/federal/effective-ban-on-non-essential-mass-gatherings-of-500-people-20200313-p549u5.html">https://www.watoday.com.au/politics/federal/effective-ban-on-non-essential-mass-gatherings-of-500-people-20200313-p549u5.html</a> |
| Ban of large gatherings | 2020-03-16  | 1.00                              | <a href="https://www.watoday.com.au/politics/federal/effective-ban-on-non-essential-mass-gatherings-of-500-people-20200313-p549u5.html">https://www.watoday.com.au/politics/federal/effective-ban-on-non-essential-mass-gatherings-of-500-people-20200313-p549u5.html</a> |
| Ban of large gatherings | 2020-03-16  | 1.00                              | <a href="https://www.watoday.com.au/politics/federal/effective-ban-on-non-essential-mass-gatherings-of-500-people-20200313-p549u5.html">https://www.watoday.com.au/politics/federal/effective-ban-on-non-essential-mass-gatherings-of-500-people-20200313-p549u5.html</a> |
| Ban of large gatherings | 2020-03-16  | 1.00                              | <a href="https://www.watoday.com.au/politics/federal/effective-ban-on-non-essential-mass-gatherings-of-500-people-20200313-p549u5.html">https://www.watoday.com.au/politics/federal/effective-ban-on-non-essential-mass-gatherings-of-500-people-20200313-p549u5.html</a> |
| Ban of large gatherings | 2020-03-16  | 1.00                              | <a href="https://www.watoday.com.au/politics/federal/effective-ban-on-non-essential-mass-gatherings-of-500-people-20200313-p549u5.html">https://www.watoday.com.au/politics/federal/effective-ban-on-non-essential-mass-gatherings-of-500-people-20200313-p549u5.html</a> |
| Ban of large gatherings | 2020-03-16  | 1.00                              | <a href="https://www.watoday.com.au/politics/federal/effective-ban-on-non-essential-mass-gatherings-of-500-people-20200313-p549u5.html">https://www.watoday.com.au/politics/federal/effective-ban-on-non-essential-mass-gatherings-of-500-people-20200313-p549u5.html</a> |
| Ban of large gatherings | 2020-03-16  | 1.00                              | <a href="https://www.watoday.com.au/politics/federal/effective-ban-on-non-essential-mass-gatherings-of-500-people-20200313-p549u5.html">https://www.watoday.com.au/politics/federal/effective-ban-on-non-essential-mass-gatherings-of-500-people-20200313-p549u5.html</a> |

| <b>NPI</b>              | <b>Date</b> | <b>CumulativeRegion<br/>share</b> | <b>Source</b>                                                                                                                                                                                                                                                   |
|-------------------------|-------------|-----------------------------------|-----------------------------------------------------------------------------------------------------------------------------------------------------------------------------------------------------------------------------------------------------------------|
| Ban of small gatherings | 2020-03-23  | 0.01                              | <a href="https://coronavirus.nt.gov.au/updates">https://coronavirus.nt.gov.au/updates</a>                                                                                                                                                                       |
| Ban of small gatherings | 2020-03-28  | 0.08                              | <a href="https://www.sa.gov.au/_data/assets/pdf_file/0003/605055/Emergency-Management-GatheringsCOVID-19-Direction-2020_FINAL.pdf">https://www.sa.gov.au/_data/assets/pdf_file/0003/605055/Emergency-Management-GatheringsCOVID-19-Direction-2020_FINAL.pdf</a> |

|                         |            |      |                      |                                                                                                                                                                                                                                                                                                                                                                                                                               |
|-------------------------|------------|------|----------------------|-------------------------------------------------------------------------------------------------------------------------------------------------------------------------------------------------------------------------------------------------------------------------------------------------------------------------------------------------------------------------------------------------------------------------------|
| Ban of small gatherings | 2020-03-29 | 0.90 | Queensland           | <a href="https://www.health.gov.au/news/health-alerts/novel-coronavirus-2019-ncov-health-alert/how-to-protect-yourself-and-others-from-coronavirus-covid-19/limits-on-public-gatherings-for-coronavirus-covid-19">https://www.health.gov.au/news/health-alerts/novel-coronavirus-2019-ncov-health-alert/how-to-protect-yourself-and-others-from-coronavirus-covid-19/limits-on-public-gatherings-for-coronavirus-covid-19</a> |
| Ban of small gatherings | 2020-03-29 | 0.90 | New South Wales      | <a href="https://www.health.gov.au/news/health-alerts/novel-coronavirus-2019-ncov-health-alert/how-to-protect-yourself-and-others-from-coronavirus-covid-19/limits-on-public-gatherings-for-coronavirus-covid-19">https://www.health.gov.au/news/health-alerts/novel-coronavirus-2019-ncov-health-alert/how-to-protect-yourself-and-others-from-coronavirus-covid-19/limits-on-public-gatherings-for-coronavirus-covid-19</a> |
| Ban of small gatherings | 2020-03-29 | 0.90 | Victoria             | <a href="https://www.health.gov.au/news/health-alerts/novel-coronavirus-2019-ncov-health-alert/how-to-protect-yourself-and-others-from-coronavirus-covid-19/limits-on-public-gatherings-for-coronavirus-covid-19">https://www.health.gov.au/news/health-alerts/novel-coronavirus-2019-ncov-health-alert/how-to-protect-yourself-and-others-from-coronavirus-covid-19/limits-on-public-gatherings-for-coronavirus-covid-19</a> |
| Ban of small gatherings | 2020-03-29 | 0.90 | Tasmania             | <a href="https://www.health.gov.au/news/health-alerts/novel-coronavirus-2019-ncov-health-alert/how-to-protect-yourself-and-others-from-coronavirus-covid-19/limits-on-public-gatherings-for-coronavirus-covid-19">https://www.health.gov.au/news/health-alerts/novel-coronavirus-2019-ncov-health-alert/how-to-protect-yourself-and-others-from-coronavirus-covid-19/limits-on-public-gatherings-for-coronavirus-covid-19</a> |
| Ban of small gatherings | 2020-03-29 | 0.90 | Australian Territory | <a href="https://www.health.gov.au/news/health-alerts/novel-coronavirus-2019-ncov-health-alert/how-to-protect-yourself-and-others-from-coronavirus-covid-19/limits-on-public-gatherings-for-coronavirus-covid-19">https://www.health.gov.au/news/health-alerts/novel-coronavirus-2019-ncov-health-alert/how-to-protect-yourself-and-others-from-coronavirus-covid-19/limits-on-public-gatherings-for-coronavirus-covid-19</a> |
| Ban of small gatherings | 2020-04-01 | 1.00 | Western Australia    | <a href="https://ww2.health.wa.gov.au/~media/Files/Corporate/general%20documents/Infectious%20diseases/PDF/Coronavirus/COVID19-Agency-Advisory-14-2020.pdf">https://ww2.health.wa.gov.au/~media/Files/Corporate/general%20documents/Infectious%20diseases/PDF/Coronavirus/COVID19-Agency-Advisory-14-2020.pdf</a>                                                                                                             |

| NPI            | Date       | Cumulative share | Region               | Source                                                                                                                                                                                                                                          |
|----------------|------------|------------------|----------------------|-------------------------------------------------------------------------------------------------------------------------------------------------------------------------------------------------------------------------------------------------|
| School closure | 2020-03-16 | 0.32             | New South Wales      | <a href="https://www.abc.net.au/news/2020-03-23/coronavirus-parents-told-to-keep-children-home-from-school/12079524">https://www.abc.net.au/news/2020-03-23/coronavirus-parents-told-to-keep-children-home-from-school/12079524</a>             |
| School closure | 2020-03-23 | 0.60             | Victoria             | <a href="https://www.theguardian.com/world/2020/mar/22/victoria-nsw-lockdowns-scott-morrison-coronavirus-national-cabinet">https://www.theguardian.com/world/2020/mar/22/victoria-nsw-lockdowns-scott-morrison-coronavirus-national-cabinet</a> |
| School closure | 2020-03-23 | 0.60             | Australian Territory | <a href="https://www.theguardian.com/world/2020/mar/22/victoria-nsw-lockdowns-scott-morrison-coronavirus-national-cabinet">https://www.theguardian.com/world/2020/mar/22/victoria-nsw-lockdowns-scott-morrison-coronavirus-national-cabinet</a> |



|                |             |                         |                    |                                                                                                                                                                                                                                                                                                                                         |
|----------------|-------------|-------------------------|--------------------|-----------------------------------------------------------------------------------------------------------------------------------------------------------------------------------------------------------------------------------------------------------------------------------------------------------------------------------------|
| School closure | 2020-04-20  | 0.80                    | Queensland         | <a href="https://www.theguardian.com/australia-news/2020/apr/13/are-schools-open-closed-term-2-australia-coronavirus-easter-holidays">https://www.theguardian.com/australia-news/2020/apr/13/are-schools-open-closed-term-2-australia-coronavirus-easter-holidays</a>                                                                   |
| <b>NPI</b>     | <b>Date</b> | <b>Cumulative share</b> | <b>Region</b>      | <b>Source</b>                                                                                                                                                                                                                                                                                                                           |
| Venue sure     | 2020-03-23  | 1.00                    | Western Australia  | <a href="https://www.theguardian.com/world/live/2020/mar/22/coronavirus-updates-live-australia-nsw-victoria-qld-tasmania-cases-government-stimulus-latest-update-news">https://www.theguardian.com/world/live/2020/mar/22/coronavirus-updates-live-australia-nsw-victoria-qld-tasmania-cases-government-stimulus-latest-update-news</a> |
| Venue sure     | 2020-03-23  | 1.00                    | Northern Territory | <a href="https://www.theguardian.com/world/live/2020/mar/22/coronavirus-updates-live-australia-nsw-victoria-qld-tasmania-cases-government-stimulus-latest-update-news">https://www.theguardian.com/world/live/2020/mar/22/coronavirus-updates-live-australia-nsw-victoria-qld-tasmania-cases-government-stimulus-latest-update-news</a> |
| Venue sure     | 2020-03-23  | 1.00                    | South Australia    | <a href="https://www.theguardian.com/world/live/2020/mar/22/coronavirus-updates-live-australia-nsw-victoria-qld-tasmania-cases-government-stimulus-latest-update-news">https://www.theguardian.com/world/live/2020/mar/22/coronavirus-updates-live-australia-nsw-victoria-qld-tasmania-cases-government-stimulus-latest-update-news</a> |
| Venue sure     | 2020-03-23  | 1.00                    | Queensland         | <a href="https://www.theguardian.com/world/live/2020/mar/22/coronavirus-updates-live-australia-nsw-victoria-qld-tasmania-cases-government-stimulus-latest-update-news">https://www.theguardian.com/world/live/2020/mar/22/coronavirus-updates-live-australia-nsw-victoria-qld-tasmania-cases-government-stimulus-latest-update-news</a> |
| Venue sure     | 2020-03-23  | 1.00                    | New South Wales    | <a href="https://www.theguardian.com/world/live/2020/mar/22/coronavirus-updates-live-australia-nsw-victoria-qld-tasmania-cases-government-stimulus-latest-update-news">https://www.theguardian.com/world/live/2020/mar/22/coronavirus-updates-live-australia-nsw-victoria-qld-tasmania-cases-government-stimulus-latest-update-news</a> |
| Venue sure     | 2020-03-23  | 1.00                    | Victoria           | <a href="https://www.theguardian.com/world/live/2020/mar/22/coronavirus-updates-live-australia-nsw-victoria-qld-tasmania-cases-government-stimulus-latest-update-news">https://www.theguardian.com/world/live/2020/mar/22/coronavirus-updates-live-australia-nsw-victoria-qld-tasmania-cases-government-stimulus-latest-update-news</a> |
| Venue sure     | 2020-03-23  | 1.00                    | Tasmania           | <a href="https://www.theguardian.com/world/live/2020/mar/22/coronavirus-updates-live-australia-nsw-victoria-qld-tasmania-cases-government-stimulus-latest-update-news">https://www.theguardian.com/world/live/2020/mar/22/coronavirus-updates-live-australia-nsw-victoria-qld-tasmania-cases-government-stimulus-latest-update-news</a> |

|               |             |                         |                      |               |                                                                                                                                                                                                                                                                                                                                                                             |
|---------------|-------------|-------------------------|----------------------|---------------|-----------------------------------------------------------------------------------------------------------------------------------------------------------------------------------------------------------------------------------------------------------------------------------------------------------------------------------------------------------------------------|
| Venue closure | 2020-03-23  | 1.00                    | Australian Territory | Capital       | <a href="https://www.theguardian.com/world/live/2020/mar/22/coronavirus-updates-live-australia-nsw-victoria-qld-tasmania-cases-government-stimulus-latest-update-news">https://www.theguardian.com/world/live/2020/mar/22/coronavirus-updates-live-australia-nsw-victoria-qld-tasmania-cases-government-stimulus-latest-update-news</a>                                     |
| <b>NPI</b>    | <b>Date</b> | <b>Cumulative share</b> | <b>Region</b>        | <b>Source</b> | <b>Source</b>                                                                                                                                                                                                                                                                                                                                                               |
| Lockdown      | 2020-03-29  | 0.02                    | Australian Territory | Capital       | <a href="https://www.covid19.act.gov.au/news-articles/latest-federal-government-announcement">https://www.covid19.act.gov.au/news-articles/latest-federal-government-announcement</a>                                                                                                                                                                                       |
| Lockdown      | 2020-03-31  | 0.62                    | New South Wales      |               | <a href="https://www.legislation.nsw.gov.au/_emergency/Public%20Health%20(COVID-19%20Restrictions%20on%20Gathering%20and%20Movement)%20Order%202020.pdf">https://www.legislation.nsw.gov.au/_emergency/Public%20Health%20(COVID-19%20Restrictions%20on%20Gathering%20and%20Movement)%20Order%202020.pdf</a>                                                                 |
| Lockdown      | 2020-03-31  | 0.62                    | Victoria             |               | <a href="https://www.vic.gov.au/coronavirusresponse">https://www.vic.gov.au/coronavirusresponse</a>                                                                                                                                                                                                                                                                         |
| Lockdown      | 2020-03-31  | 0.62                    | Tasmania             |               | <a href="http://www.premier.tas.gov.au/releases/keeping_tasmanians_safe_and_secure_stay_home,_save_lives">http://www.premier.tas.gov.au/releases/keeping_tasmanians_safe_and_secure_stay_home,_save_lives</a>                                                                                                                                                               |
| Lockdown      | 2020-04-02  | 0.82                    | Queensland           |               | <a href="https://www.health.qld.gov.au/system-governance/legislation/cho-public-health-directions-under-expanded-public-health-act-powers/home-confinement-movement-gathering-direction">https://www.health.qld.gov.au/system-governance/legislation/cho-public-health-directions-under-expanded-public-health-act-powers/home-confinement-movement-gathering-direction</a> |

**Table 11.** Sources for policies implemented across different Australian regions

| NPI                     | Date       | Cumulative Region share | Source                                                                                                                                                                                                                                              |
|-------------------------|------------|-------------------------|-----------------------------------------------------------------------------------------------------------------------------------------------------------------------------------------------------------------------------------------------------|
| Ban of large gatherings | 2020-03-02 | 0.32                    | <a href="https://www.gazzettaufficiale.it/eli/id/2020/03/01/20A01381/sg">https://www.gazzettaufficiale.it/eli/id/2020/03/01/20A01381/sg</a>                                                                                                         |
| Ban of large gatherings | 2020-03-02 | 0.32                    | <a href="https://www.gazzettaufficiale.it/eli/id/2020/03/01/20A01381/sg">https://www.gazzettaufficiale.it/eli/id/2020/03/01/20A01381/sg</a>                                                                                                         |
| Ban of large gatherings | 2020-03-02 | 0.32                    | <a href="https://www.gazzettaufficiale.it/eli/id/2020/03/01/20A01381/sg">https://www.gazzettaufficiale.it/eli/id/2020/03/01/20A01381/sg</a>                                                                                                         |
| Ban of large gatherings | 2020-03-08 | 1.00                    | <a href="https://www.gazzettaufficiale.it/showNewsDetail?id=2513&amp;backTo=archivio&amp;anno=2020&amp;provenienza=archivio">https://www.gazzettaufficiale.it/showNewsDetail?id=2513&amp;backTo=archivio&amp;anno=2020&amp;provenienza=archivio</a> |
| Ban of large gatherings | 2020-03-08 | 1.00                    | <a href="https://www.gazzettaufficiale.it/showNewsDetail?id=2513&amp;backTo=archivio&amp;anno=2020&amp;provenienza=archivio">https://www.gazzettaufficiale.it/showNewsDetail?id=2513&amp;backTo=archivio&amp;anno=2020&amp;provenienza=archivio</a> |
| Ban of large gatherings | 2020-03-08 | 1.00                    | <a href="https://www.gazzettaufficiale.it/showNewsDetail?id=2513&amp;backTo=archivio&amp;anno=2020&amp;provenienza=archivio">https://www.gazzettaufficiale.it/showNewsDetail?id=2513&amp;backTo=archivio&amp;anno=2020&amp;provenienza=archivio</a> |
| Ban of large gatherings | 2020-03-08 | 1.00                    | <a href="https://www.gazzettaufficiale.it/showNewsDetail?id=2513&amp;backTo=archivio&amp;anno=2020&amp;provenienza=archivio">https://www.gazzettaufficiale.it/showNewsDetail?id=2513&amp;backTo=archivio&amp;anno=2020&amp;provenienza=archivio</a> |
| Ban of large gatherings | 2020-03-08 | 1.00                    | <a href="https://www.gazzettaufficiale.it/showNewsDetail?id=2513&amp;backTo=archivio&amp;anno=2020&amp;provenienza=archivio">https://www.gazzettaufficiale.it/showNewsDetail?id=2513&amp;backTo=archivio&amp;anno=2020&amp;provenienza=archivio</a> |
| Ban of large gatherings | 2020-03-08 | 1.00                    | <a href="https://www.gazzettaufficiale.it/showNewsDetail?id=2513&amp;backTo=archivio&amp;anno=2020&amp;provenienza=archivio">https://www.gazzettaufficiale.it/showNewsDetail?id=2513&amp;backTo=archivio&amp;anno=2020&amp;provenienza=archivio</a> |
| Ban of large gatherings | 2020-03-08 | 1.00                    | <a href="https://www.gazzettaufficiale.it/showNewsDetail?id=2513&amp;backTo=archivio&amp;anno=2020&amp;provenienza=archivio">https://www.gazzettaufficiale.it/showNewsDetail?id=2513&amp;backTo=archivio&amp;anno=2020&amp;provenienza=archivio</a> |
| Ban of large gatherings | 2020-03-08 | 1.00                    | <a href="https://www.gazzettaufficiale.it/showNewsDetail?id=2513&amp;backTo=archivio&amp;anno=2020&amp;provenienza=archivio">https://www.gazzettaufficiale.it/showNewsDetail?id=2513&amp;backTo=archivio&amp;anno=2020&amp;provenienza=archivio</a> |
| Ban of large gatherings | 2020-03-08 | 1.00                    | <a href="https://www.gazzettaufficiale.it/showNewsDetail?id=2513&amp;backTo=archivio&amp;anno=2020&amp;provenienza=archivio">https://www.gazzettaufficiale.it/showNewsDetail?id=2513&amp;backTo=archivio&amp;anno=2020&amp;provenienza=archivio</a> |
| Ban of large gatherings | 2020-03-08 | 1.00                    | <a href="https://www.gazzettaufficiale.it/showNewsDetail?id=2513&amp;backTo=archivio&amp;anno=2020&amp;provenienza=archivio">https://www.gazzettaufficiale.it/showNewsDetail?id=2513&amp;backTo=archivio&amp;anno=2020&amp;provenienza=archivio</a> |

|                         |            |      |                       |                                                                                                                                                                                                                                                     |
|-------------------------|------------|------|-----------------------|-----------------------------------------------------------------------------------------------------------------------------------------------------------------------------------------------------------------------------------------------------|
| Ban of large gatherings | 2020-03-08 | 1.00 | Umbria                | <a href="https://www.gazzettaufficiale.it/showNewsDetail?id=2513&amp;backTo=archivio&amp;anno=2020&amp;provenienza=archivio">https://www.gazzettaufficiale.it/showNewsDetail?id=2513&amp;backTo=archivio&amp;anno=2020&amp;provenienza=archivio</a> |
| Ban of large gatherings | 2020-03-08 | 1.00 | Lazio                 | <a href="https://www.gazzettaufficiale.it/showNewsDetail?id=2513&amp;backTo=archivio&amp;anno=2020&amp;provenienza=archivio">https://www.gazzettaufficiale.it/showNewsDetail?id=2513&amp;backTo=archivio&amp;anno=2020&amp;provenienza=archivio</a> |
| Ban of large gatherings | 2020-03-08 | 1.00 | Friuli-Venezia Giulia | <a href="https://www.gazzettaufficiale.it/showNewsDetail?id=2513&amp;backTo=archivio&amp;anno=2020&amp;provenienza=archivio">https://www.gazzettaufficiale.it/showNewsDetail?id=2513&amp;backTo=archivio&amp;anno=2020&amp;provenienza=archivio</a> |
| Ban of large gatherings | 2020-03-08 | 1.00 | Campania              | <a href="https://www.gazzettaufficiale.it/showNewsDetail?id=2513&amp;backTo=archivio&amp;anno=2020&amp;provenienza=archivio">https://www.gazzettaufficiale.it/showNewsDetail?id=2513&amp;backTo=archivio&amp;anno=2020&amp;provenienza=archivio</a> |
| Ban of large gatherings | 2020-03-08 | 1.00 | Calabria              | <a href="https://www.gazzettaufficiale.it/showNewsDetail?id=2513&amp;backTo=archivio&amp;anno=2020&amp;provenienza=archivio">https://www.gazzettaufficiale.it/showNewsDetail?id=2513&amp;backTo=archivio&amp;anno=2020&amp;provenienza=archivio</a> |
| Ban of large gatherings | 2020-03-08 | 1.00 | Basilicata            | <a href="https://www.gazzettaufficiale.it/showNewsDetail?id=2513&amp;backTo=archivio&amp;anno=2020&amp;provenienza=archivio">https://www.gazzettaufficiale.it/showNewsDetail?id=2513&amp;backTo=archivio&amp;anno=2020&amp;provenienza=archivio</a> |
| Ban of large gatherings | 2020-03-08 | 1.00 | Abruzzo               | <a href="https://www.gazzettaufficiale.it/showNewsDetail?id=2513&amp;backTo=archivio&amp;anno=2020&amp;provenienza=archivio">https://www.gazzettaufficiale.it/showNewsDetail?id=2513&amp;backTo=archivio&amp;anno=2020&amp;provenienza=archivio</a> |
| Ban of large gatherings | 2020-03-08 | 1.00 | Marche                | <a href="https://www.gazzettaufficiale.it/showNewsDetail?id=2513&amp;backTo=archivio&amp;anno=2020&amp;provenienza=archivio">https://www.gazzettaufficiale.it/showNewsDetail?id=2513&amp;backTo=archivio&amp;anno=2020&amp;provenienza=archivio</a> |
| Ban of large gatherings | 2020-03-08 | 1.00 | Aosta Valley          | <a href="https://www.gazzettaufficiale.it/showNewsDetail?id=2513&amp;backTo=archivio&amp;anno=2020&amp;provenienza=archivio">https://www.gazzettaufficiale.it/showNewsDetail?id=2513&amp;backTo=archivio&amp;anno=2020&amp;provenienza=archivio</a> |

| <b>NPI</b>              | <b>Date</b> | <b>Cumulative share</b> | <b>Region</b>  | <b>Source</b>                                                                                                                               |
|-------------------------|-------------|-------------------------|----------------|---------------------------------------------------------------------------------------------------------------------------------------------|
| Ban of small gatherings | 2020-03-02  | 0.32                    | Lombardia      | <a href="https://www.gazzettaufficiale.it/eli/id/2020/03/01/20A01381/sg">https://www.gazzettaufficiale.it/eli/id/2020/03/01/20A01381/sg</a> |
| Ban of small gatherings | 2020-03-02  | 0.32                    | Veneto         | <a href="https://www.gazzettaufficiale.it/eli/id/2020/03/01/20A01381/sg">https://www.gazzettaufficiale.it/eli/id/2020/03/01/20A01381/sg</a> |
| Ban of small gatherings | 2020-03-02  | 0.32                    | Emilia-Romagna | <a href="https://www.gazzettaufficiale.it/eli/id/2020/03/01/20A01381/sg">https://www.gazzettaufficiale.it/eli/id/2020/03/01/20A01381/sg</a> |

|                         |            |      |                       |                                                                                                                                                                                                                                                     |
|-------------------------|------------|------|-----------------------|-----------------------------------------------------------------------------------------------------------------------------------------------------------------------------------------------------------------------------------------------------|
| Ban of small gatherings | 2020-03-08 | 1.00 | Trentino-South Tyrol  | <a href="https://www.gazzettaufficiale.it/showNewsDetail?id=2513&amp;backTo=archivio&amp;anno=2020&amp;provenienza=archivio">https://www.gazzettaufficiale.it/showNewsDetail?id=2513&amp;backTo=archivio&amp;anno=2020&amp;provenienza=archivio</a> |
| Ban of small gatherings | 2020-03-08 | 1.00 | Tuscany               | <a href="https://www.gazzettaufficiale.it/showNewsDetail?id=2513&amp;backTo=archivio&amp;anno=2020&amp;provenienza=archivio">https://www.gazzettaufficiale.it/showNewsDetail?id=2513&amp;backTo=archivio&amp;anno=2020&amp;provenienza=archivio</a> |
| Ban of small gatherings | 2020-03-08 | 1.00 | Sicily                | <a href="https://www.gazzettaufficiale.it/showNewsDetail?id=2513&amp;backTo=archivio&amp;anno=2020&amp;provenienza=archivio">https://www.gazzettaufficiale.it/showNewsDetail?id=2513&amp;backTo=archivio&amp;anno=2020&amp;provenienza=archivio</a> |
| Ban of small gatherings | 2020-03-08 | 1.00 | Sardinia              | <a href="https://www.gazzettaufficiale.it/showNewsDetail?id=2513&amp;backTo=archivio&amp;anno=2020&amp;provenienza=archivio">https://www.gazzettaufficiale.it/showNewsDetail?id=2513&amp;backTo=archivio&amp;anno=2020&amp;provenienza=archivio</a> |
| Ban of small gatherings | 2020-03-08 | 1.00 | Puglia (Apulia)       | <a href="https://www.gazzettaufficiale.it/showNewsDetail?id=2513&amp;backTo=archivio&amp;anno=2020&amp;provenienza=archivio">https://www.gazzettaufficiale.it/showNewsDetail?id=2513&amp;backTo=archivio&amp;anno=2020&amp;provenienza=archivio</a> |
| Ban of small gatherings | 2020-03-08 | 1.00 | Piemonte              | <a href="https://www.gazzettaufficiale.it/showNewsDetail?id=2513&amp;backTo=archivio&amp;anno=2020&amp;provenienza=archivio">https://www.gazzettaufficiale.it/showNewsDetail?id=2513&amp;backTo=archivio&amp;anno=2020&amp;provenienza=archivio</a> |
| Ban of small gatherings | 2020-03-08 | 1.00 | Molise                | <a href="https://www.gazzettaufficiale.it/showNewsDetail?id=2513&amp;backTo=archivio&amp;anno=2020&amp;provenienza=archivio">https://www.gazzettaufficiale.it/showNewsDetail?id=2513&amp;backTo=archivio&amp;anno=2020&amp;provenienza=archivio</a> |
| Ban of small gatherings | 2020-03-08 | 1.00 | Liguria               | <a href="https://www.gazzettaufficiale.it/showNewsDetail?id=2513&amp;backTo=archivio&amp;anno=2020&amp;provenienza=archivio">https://www.gazzettaufficiale.it/showNewsDetail?id=2513&amp;backTo=archivio&amp;anno=2020&amp;provenienza=archivio</a> |
| Ban of small gatherings | 2020-03-08 | 1.00 | Umbria                | <a href="https://www.gazzettaufficiale.it/showNewsDetail?id=2513&amp;backTo=archivio&amp;anno=2020&amp;provenienza=archivio">https://www.gazzettaufficiale.it/showNewsDetail?id=2513&amp;backTo=archivio&amp;anno=2020&amp;provenienza=archivio</a> |
| Ban of small gatherings | 2020-03-08 | 1.00 | Lazio                 | <a href="https://www.gazzettaufficiale.it/showNewsDetail?id=2513&amp;backTo=archivio&amp;anno=2020&amp;provenienza=archivio">https://www.gazzettaufficiale.it/showNewsDetail?id=2513&amp;backTo=archivio&amp;anno=2020&amp;provenienza=archivio</a> |
| Ban of small gatherings | 2020-03-08 | 1.00 | Friuli-Venezia Giulia | <a href="https://www.gazzettaufficiale.it/showNewsDetail?id=2513&amp;backTo=archivio&amp;anno=2020&amp;provenienza=archivio">https://www.gazzettaufficiale.it/showNewsDetail?id=2513&amp;backTo=archivio&amp;anno=2020&amp;provenienza=archivio</a> |
| Ban of small gatherings | 2020-03-08 | 1.00 | Campania              | <a href="https://www.gazzettaufficiale.it/showNewsDetail?id=2513&amp;backTo=archivio&amp;anno=2020&amp;provenienza=archivio">https://www.gazzettaufficiale.it/showNewsDetail?id=2513&amp;backTo=archivio&amp;anno=2020&amp;provenienza=archivio</a> |
| Ban of small gatherings | 2020-03-08 | 1.00 | Calabria              | <a href="https://www.gazzettaufficiale.it/showNewsDetail?id=2513&amp;backTo=archivio&amp;anno=2020&amp;provenienza=archivio">https://www.gazzettaufficiale.it/showNewsDetail?id=2513&amp;backTo=archivio&amp;anno=2020&amp;provenienza=archivio</a> |

|                         |            |      |              |                                                                                                                                                                                                                                                     |
|-------------------------|------------|------|--------------|-----------------------------------------------------------------------------------------------------------------------------------------------------------------------------------------------------------------------------------------------------|
| Ban of small gatherings | 2020-03-08 | 1.00 | Basilicata   | <a href="https://www.gazzettaufficiale.it/showNewsDetail?id=2513&amp;backTo=archivio&amp;anno=2020&amp;provenienza=archivio">https://www.gazzettaufficiale.it/showNewsDetail?id=2513&amp;backTo=archivio&amp;anno=2020&amp;provenienza=archivio</a> |
| Ban of small gatherings | 2020-03-08 | 1.00 | Abruzzo      | <a href="https://www.gazzettaufficiale.it/showNewsDetail?id=2513&amp;backTo=archivio&amp;anno=2020&amp;provenienza=archivio">https://www.gazzettaufficiale.it/showNewsDetail?id=2513&amp;backTo=archivio&amp;anno=2020&amp;provenienza=archivio</a> |
| Ban of small gatherings | 2020-03-08 | 1.00 | Marche       | <a href="https://www.gazzettaufficiale.it/showNewsDetail?id=2513&amp;backTo=archivio&amp;anno=2020&amp;provenienza=archivio">https://www.gazzettaufficiale.it/showNewsDetail?id=2513&amp;backTo=archivio&amp;anno=2020&amp;provenienza=archivio</a> |
| Ban of small gatherings | 2020-03-08 | 1.00 | Aosta Valley | <a href="https://www.gazzettaufficiale.it/showNewsDetail?id=2513&amp;backTo=archivio&amp;anno=2020&amp;provenienza=archivio">https://www.gazzettaufficiale.it/showNewsDetail?id=2513&amp;backTo=archivio&amp;anno=2020&amp;provenienza=archivio</a> |

| NPI            | Date       | Cumulative share | Region               | Source                                                                                                                                      |
|----------------|------------|------------------|----------------------|---------------------------------------------------------------------------------------------------------------------------------------------|
| School closure | 2020-03-02 | 0.32             | Lombardia            | <a href="https://www.gazzettaufficiale.it/eli/id/2020/03/01/20A01381/sg">https://www.gazzettaufficiale.it/eli/id/2020/03/01/20A01381/sg</a> |
| School closure | 2020-03-02 | 0.32             | Veneto               | <a href="https://www.gazzettaufficiale.it/eli/id/2020/03/01/20A01381/sg">https://www.gazzettaufficiale.it/eli/id/2020/03/01/20A01381/sg</a> |
| School closure | 2020-03-02 | 0.32             | Emilia-Romagna       | <a href="https://www.gazzettaufficiale.it/eli/id/2020/03/01/20A01381/sg">https://www.gazzettaufficiale.it/eli/id/2020/03/01/20A01381/sg</a> |
| School closure | 2020-03-05 | 1.00             | Trentino-South Tyrol | <a href="https://www.gazzettaufficiale.it/eli/id/2020/03/04/20A01475/sg">https://www.gazzettaufficiale.it/eli/id/2020/03/04/20A01475/sg</a> |
| School closure | 2020-03-05 | 1.00             | Tuscany              | <a href="https://www.gazzettaufficiale.it/eli/id/2020/03/04/20A01475/sg">https://www.gazzettaufficiale.it/eli/id/2020/03/04/20A01475/sg</a> |
| School closure | 2020-03-05 | 1.00             | Sicily               | <a href="https://www.gazzettaufficiale.it/eli/id/2020/03/04/20A01475/sg">https://www.gazzettaufficiale.it/eli/id/2020/03/04/20A01475/sg</a> |
| School closure | 2020-03-05 | 1.00             | Sardinia             | <a href="https://www.gazzettaufficiale.it/eli/id/2020/03/04/20A01475/sg">https://www.gazzettaufficiale.it/eli/id/2020/03/04/20A01475/sg</a> |
| School closure | 2020-03-05 | 1.00             | Puglia (Apulia)      | <a href="https://www.gazzettaufficiale.it/eli/id/2020/03/04/20A01475/sg">https://www.gazzettaufficiale.it/eli/id/2020/03/04/20A01475/sg</a> |

|                |             |                   |                       |                                                                                                                                             |
|----------------|-------------|-------------------|-----------------------|---------------------------------------------------------------------------------------------------------------------------------------------|
| School closure | 2020-03-05  | 1.00              | Piemonte              | <a href="https://www.gazzettaufficiale.it/eli/id/2020/03/04/20A01475/sg">https://www.gazzettaufficiale.it/eli/id/2020/03/04/20A01475/sg</a> |
| School closure | 2020-03-05  | 1.00              | Molise                | <a href="https://www.gazzettaufficiale.it/eli/id/2020/03/04/20A01475/sg">https://www.gazzettaufficiale.it/eli/id/2020/03/04/20A01475/sg</a> |
| School closure | 2020-03-05  | 1.00              | Liguria               | <a href="https://www.gazzettaufficiale.it/eli/id/2020/03/04/20A01475/sg">https://www.gazzettaufficiale.it/eli/id/2020/03/04/20A01475/sg</a> |
| School closure | 2020-03-05  | 1.00              | Umbria                | <a href="https://www.gazzettaufficiale.it/eli/id/2020/03/04/20A01475/sg">https://www.gazzettaufficiale.it/eli/id/2020/03/04/20A01475/sg</a> |
| School closure | 2020-03-05  | 1.00              | Lazio                 | <a href="https://www.gazzettaufficiale.it/eli/id/2020/03/04/20A01475/sg">https://www.gazzettaufficiale.it/eli/id/2020/03/04/20A01475/sg</a> |
| School closure | 2020-03-05  | 1.00              | Friuli-Venezia Giulia | <a href="https://www.gazzettaufficiale.it/eli/id/2020/03/04/20A01475/sg">https://www.gazzettaufficiale.it/eli/id/2020/03/04/20A01475/sg</a> |
| School closure | 2020-03-05  | 1.00              | Campania              | <a href="https://www.gazzettaufficiale.it/eli/id/2020/03/04/20A01475/sg">https://www.gazzettaufficiale.it/eli/id/2020/03/04/20A01475/sg</a> |
| School closure | 2020-03-05  | 1.00              | Calabria              | <a href="https://www.gazzettaufficiale.it/eli/id/2020/03/04/20A01475/sg">https://www.gazzettaufficiale.it/eli/id/2020/03/04/20A01475/sg</a> |
| School closure | 2020-03-05  | 1.00              | Basilicata            | <a href="https://www.gazzettaufficiale.it/eli/id/2020/03/04/20A01475/sg">https://www.gazzettaufficiale.it/eli/id/2020/03/04/20A01475/sg</a> |
| School closure | 2020-03-05  | 1.00              | Abruzzo               | <a href="https://www.gazzettaufficiale.it/eli/id/2020/03/04/20A01475/sg">https://www.gazzettaufficiale.it/eli/id/2020/03/04/20A01475/sg</a> |
| School closure | 2020-03-05  | 1.00              | Marche                | <a href="https://www.gazzettaufficiale.it/eli/id/2020/03/04/20A01475/sg">https://www.gazzettaufficiale.it/eli/id/2020/03/04/20A01475/sg</a> |
| School closure | 2020-03-05  | 1.00              | Aosta Valley          | <a href="https://www.gazzettaufficiale.it/eli/id/2020/03/04/20A01475/sg">https://www.gazzettaufficiale.it/eli/id/2020/03/04/20A01475/sg</a> |
| <b>NPI</b>     | <b>Date</b> | <b>Cumulative</b> | <b>Region</b>         | <b>Source</b>                                                                                                                               |
|                |             | <b>share</b>      |                       |                                                                                                                                             |

|       |      |            |      |                       |                                                                                                                                                                                                                                                     |
|-------|------|------------|------|-----------------------|-----------------------------------------------------------------------------------------------------------------------------------------------------------------------------------------------------------------------------------------------------|
| Venue | clo- | 2020-03-12 | 1.00 | Lombardia             | <a href="https://www.gazzettaufficiale.it/showNewsDetail?id=2532&amp;backTo=archivio&amp;anno=2020&amp;provenienza=archivio">https://www.gazzettaufficiale.it/showNewsDetail?id=2532&amp;backTo=archivio&amp;anno=2020&amp;provenienza=archivio</a> |
| sure  |      |            |      |                       |                                                                                                                                                                                                                                                     |
| Venue | clo- | 2020-03-12 | 1.00 | Trentino-South Tyrol  | <a href="https://www.gazzettaufficiale.it/showNewsDetail?id=2532&amp;backTo=archivio&amp;anno=2020&amp;provenienza=archivio">https://www.gazzettaufficiale.it/showNewsDetail?id=2532&amp;backTo=archivio&amp;anno=2020&amp;provenienza=archivio</a> |
| sure  |      |            |      |                       |                                                                                                                                                                                                                                                     |
| Venue | clo- | 2020-03-12 | 1.00 | Tuscany               | <a href="https://www.gazzettaufficiale.it/showNewsDetail?id=2532&amp;backTo=archivio&amp;anno=2020&amp;provenienza=archivio">https://www.gazzettaufficiale.it/showNewsDetail?id=2532&amp;backTo=archivio&amp;anno=2020&amp;provenienza=archivio</a> |
| sure  |      |            |      |                       |                                                                                                                                                                                                                                                     |
| Venue | clo- | 2020-03-12 | 1.00 | Sicily                | <a href="https://www.gazzettaufficiale.it/showNewsDetail?id=2532&amp;backTo=archivio&amp;anno=2020&amp;provenienza=archivio">https://www.gazzettaufficiale.it/showNewsDetail?id=2532&amp;backTo=archivio&amp;anno=2020&amp;provenienza=archivio</a> |
| sure  |      |            |      |                       |                                                                                                                                                                                                                                                     |
| Venue | clo- | 2020-03-12 | 1.00 | Sardinia              | <a href="https://www.gazzettaufficiale.it/showNewsDetail?id=2532&amp;backTo=archivio&amp;anno=2020&amp;provenienza=archivio">https://www.gazzettaufficiale.it/showNewsDetail?id=2532&amp;backTo=archivio&amp;anno=2020&amp;provenienza=archivio</a> |
| sure  |      |            |      |                       |                                                                                                                                                                                                                                                     |
| Venue | clo- | 2020-03-12 | 1.00 | Puglia (Apulia)       | <a href="https://www.gazzettaufficiale.it/showNewsDetail?id=2532&amp;backTo=archivio&amp;anno=2020&amp;provenienza=archivio">https://www.gazzettaufficiale.it/showNewsDetail?id=2532&amp;backTo=archivio&amp;anno=2020&amp;provenienza=archivio</a> |
| sure  |      |            |      |                       |                                                                                                                                                                                                                                                     |
| Venue | clo- | 2020-03-12 | 1.00 | Piemonte              | <a href="https://www.gazzettaufficiale.it/showNewsDetail?id=2532&amp;backTo=archivio&amp;anno=2020&amp;provenienza=archivio">https://www.gazzettaufficiale.it/showNewsDetail?id=2532&amp;backTo=archivio&amp;anno=2020&amp;provenienza=archivio</a> |
| sure  |      |            |      |                       |                                                                                                                                                                                                                                                     |
| Venue | clo- | 2020-03-12 | 1.00 | Molise                | <a href="https://www.gazzettaufficiale.it/showNewsDetail?id=2532&amp;backTo=archivio&amp;anno=2020&amp;provenienza=archivio">https://www.gazzettaufficiale.it/showNewsDetail?id=2532&amp;backTo=archivio&amp;anno=2020&amp;provenienza=archivio</a> |
| sure  |      |            |      |                       |                                                                                                                                                                                                                                                     |
| Venue | clo- | 2020-03-12 | 1.00 | Marche                | <a href="https://www.gazzettaufficiale.it/showNewsDetail?id=2532&amp;backTo=archivio&amp;anno=2020&amp;provenienza=archivio">https://www.gazzettaufficiale.it/showNewsDetail?id=2532&amp;backTo=archivio&amp;anno=2020&amp;provenienza=archivio</a> |
| sure  |      |            |      |                       |                                                                                                                                                                                                                                                     |
| Venue | clo- | 2020-03-12 | 1.00 | Liguria               | <a href="https://www.gazzettaufficiale.it/showNewsDetail?id=2532&amp;backTo=archivio&amp;anno=2020&amp;provenienza=archivio">https://www.gazzettaufficiale.it/showNewsDetail?id=2532&amp;backTo=archivio&amp;anno=2020&amp;provenienza=archivio</a> |
| sure  |      |            |      |                       |                                                                                                                                                                                                                                                     |
| Venue | clo- | 2020-03-12 | 1.00 | Lazio                 | <a href="https://www.gazzettaufficiale.it/showNewsDetail?id=2532&amp;backTo=archivio&amp;anno=2020&amp;provenienza=archivio">https://www.gazzettaufficiale.it/showNewsDetail?id=2532&amp;backTo=archivio&amp;anno=2020&amp;provenienza=archivio</a> |
| sure  |      |            |      |                       |                                                                                                                                                                                                                                                     |
| Venue | clo- | 2020-03-12 | 1.00 | Friuli-Venezia Giulia | <a href="https://www.gazzettaufficiale.it/showNewsDetail?id=2532&amp;backTo=archivio&amp;anno=2020&amp;provenienza=archivio">https://www.gazzettaufficiale.it/showNewsDetail?id=2532&amp;backTo=archivio&amp;anno=2020&amp;provenienza=archivio</a> |
| sure  |      |            |      |                       |                                                                                                                                                                                                                                                     |
| Venue | clo- | 2020-03-12 | 1.00 | Campania              | <a href="https://www.gazzettaufficiale.it/showNewsDetail?id=2532&amp;backTo=archivio&amp;anno=2020&amp;provenienza=archivio">https://www.gazzettaufficiale.it/showNewsDetail?id=2532&amp;backTo=archivio&amp;anno=2020&amp;provenienza=archivio</a> |
| sure  |      |            |      |                       |                                                                                                                                                                                                                                                     |



|       |      |            |      |                |                                                                                                                                                                                                                                                     |
|-------|------|------------|------|----------------|-----------------------------------------------------------------------------------------------------------------------------------------------------------------------------------------------------------------------------------------------------|
| Venue | clo- | 2020-03-12 | 1.00 | Calabria       | <a href="https://www.gazzettaufficiale.it/showNewsDetail?id=2532&amp;backTo=archivio&amp;anno=2020&amp;provenienza=archivio">https://www.gazzettaufficiale.it/showNewsDetail?id=2532&amp;backTo=archivio&amp;anno=2020&amp;provenienza=archivio</a> |
| Venue | clo- | 2020-03-12 | 1.00 | Basilicata     | <a href="https://www.gazzettaufficiale.it/showNewsDetail?id=2532&amp;backTo=archivio&amp;anno=2020&amp;provenienza=archivio">https://www.gazzettaufficiale.it/showNewsDetail?id=2532&amp;backTo=archivio&amp;anno=2020&amp;provenienza=archivio</a> |
| Venue | clo- | 2020-03-12 | 1.00 | Abruzzo        | <a href="https://www.gazzettaufficiale.it/showNewsDetail?id=2532&amp;backTo=archivio&amp;anno=2020&amp;provenienza=archivio">https://www.gazzettaufficiale.it/showNewsDetail?id=2532&amp;backTo=archivio&amp;anno=2020&amp;provenienza=archivio</a> |
| Venue | clo- | 2020-03-12 | 1.00 | Emilia-Romagna | <a href="https://www.gazzettaufficiale.it/showNewsDetail?id=2532&amp;backTo=archivio&amp;anno=2020&amp;provenienza=archivio">https://www.gazzettaufficiale.it/showNewsDetail?id=2532&amp;backTo=archivio&amp;anno=2020&amp;provenienza=archivio</a> |
| Venue | clo- | 2020-03-12 | 1.00 | Veneto         | <a href="https://www.gazzettaufficiale.it/showNewsDetail?id=2532&amp;backTo=archivio&amp;anno=2020&amp;provenienza=archivio">https://www.gazzettaufficiale.it/showNewsDetail?id=2532&amp;backTo=archivio&amp;anno=2020&amp;provenienza=archivio</a> |
| Venue | clo- | 2020-03-12 | 1.00 | Umbria         | <a href="https://www.gazzettaufficiale.it/showNewsDetail?id=2532&amp;backTo=archivio&amp;anno=2020&amp;provenienza=archivio">https://www.gazzettaufficiale.it/showNewsDetail?id=2532&amp;backTo=archivio&amp;anno=2020&amp;provenienza=archivio</a> |
| Venue | clo- | 2020-03-12 | 1.00 | Aosta Valley   | <a href="https://www.gazzettaufficiale.it/showNewsDetail?id=2532&amp;backTo=archivio&amp;anno=2020&amp;provenienza=archivio">https://www.gazzettaufficiale.it/showNewsDetail?id=2532&amp;backTo=archivio&amp;anno=2020&amp;provenienza=archivio</a> |

---

**NPI**      **Date**      **Cumulative**      **Source**

share

|          |  |            |      |                      |                                                                                                                                                                                                                                                     |
|----------|--|------------|------|----------------------|-----------------------------------------------------------------------------------------------------------------------------------------------------------------------------------------------------------------------------------------------------|
| Lockdown |  | 2020-03-12 | 1.00 | Lombardia            | <a href="https://www.gazzettaufficiale.it/showNewsDetail?id=2532&amp;backTo=archivio&amp;anno=2020&amp;provenienza=archivio">https://www.gazzettaufficiale.it/showNewsDetail?id=2532&amp;backTo=archivio&amp;anno=2020&amp;provenienza=archivio</a> |
| Lockdown |  | 2020-03-12 | 1.00 | Trentino-South Tyrol | <a href="https://www.gazzettaufficiale.it/showNewsDetail?id=2532&amp;backTo=archivio&amp;anno=2020&amp;provenienza=archivio">https://www.gazzettaufficiale.it/showNewsDetail?id=2532&amp;backTo=archivio&amp;anno=2020&amp;provenienza=archivio</a> |
| Lockdown |  | 2020-03-12 | 1.00 | Tuscany              | <a href="https://www.gazzettaufficiale.it/showNewsDetail?id=2532&amp;backTo=archivio&amp;anno=2020&amp;provenienza=archivio">https://www.gazzettaufficiale.it/showNewsDetail?id=2532&amp;backTo=archivio&amp;anno=2020&amp;provenienza=archivio</a> |
| Lockdown |  | 2020-03-12 | 1.00 | Sicily               | <a href="https://www.gazzettaufficiale.it/showNewsDetail?id=2532&amp;backTo=archivio&amp;anno=2020&amp;provenienza=archivio">https://www.gazzettaufficiale.it/showNewsDetail?id=2532&amp;backTo=archivio&amp;anno=2020&amp;provenienza=archivio</a> |
| Lockdown |  | 2020-03-12 | 1.00 | Sardinia             | <a href="https://www.gazzettaufficiale.it/showNewsDetail?id=2532&amp;backTo=archivio&amp;anno=2020&amp;provenienza=archivio">https://www.gazzettaufficiale.it/showNewsDetail?id=2532&amp;backTo=archivio&amp;anno=2020&amp;provenienza=archivio</a> |

|          |            |      |                       |                                                                                                                                                                                                                                                     |
|----------|------------|------|-----------------------|-----------------------------------------------------------------------------------------------------------------------------------------------------------------------------------------------------------------------------------------------------|
| Lockdown | 2020-03-12 | 1.00 | Puglia (Apulia)       | <a href="https://www.gazzettaufficiale.it/showNewsDetail?id=2532&amp;backTo=archivio&amp;anno=2020&amp;provenienza=archivio">https://www.gazzettaufficiale.it/showNewsDetail?id=2532&amp;backTo=archivio&amp;anno=2020&amp;provenienza=archivio</a> |
| Lockdown | 2020-03-12 | 1.00 | Piemonte              | <a href="https://www.gazzettaufficiale.it/showNewsDetail?id=2532&amp;backTo=archivio&amp;anno=2020&amp;provenienza=archivio">https://www.gazzettaufficiale.it/showNewsDetail?id=2532&amp;backTo=archivio&amp;anno=2020&amp;provenienza=archivio</a> |
| Lockdown | 2020-03-12 | 1.00 | Molise                | <a href="https://www.gazzettaufficiale.it/showNewsDetail?id=2532&amp;backTo=archivio&amp;anno=2020&amp;provenienza=archivio">https://www.gazzettaufficiale.it/showNewsDetail?id=2532&amp;backTo=archivio&amp;anno=2020&amp;provenienza=archivio</a> |
| Lockdown | 2020-03-12 | 1.00 | Marche                | <a href="https://www.gazzettaufficiale.it/showNewsDetail?id=2532&amp;backTo=archivio&amp;anno=2020&amp;provenienza=archivio">https://www.gazzettaufficiale.it/showNewsDetail?id=2532&amp;backTo=archivio&amp;anno=2020&amp;provenienza=archivio</a> |
| Lockdown | 2020-03-12 | 1.00 | Liguria               | <a href="https://www.gazzettaufficiale.it/showNewsDetail?id=2532&amp;backTo=archivio&amp;anno=2020&amp;provenienza=archivio">https://www.gazzettaufficiale.it/showNewsDetail?id=2532&amp;backTo=archivio&amp;anno=2020&amp;provenienza=archivio</a> |
| Lockdown | 2020-03-12 | 1.00 | Lazio                 | <a href="https://www.gazzettaufficiale.it/showNewsDetail?id=2532&amp;backTo=archivio&amp;anno=2020&amp;provenienza=archivio">https://www.gazzettaufficiale.it/showNewsDetail?id=2532&amp;backTo=archivio&amp;anno=2020&amp;provenienza=archivio</a> |
| Lockdown | 2020-03-12 | 1.00 | Friuli-Venezia Giulia | <a href="https://www.gazzettaufficiale.it/showNewsDetail?id=2532&amp;backTo=archivio&amp;anno=2020&amp;provenienza=archivio">https://www.gazzettaufficiale.it/showNewsDetail?id=2532&amp;backTo=archivio&amp;anno=2020&amp;provenienza=archivio</a> |
| Lockdown | 2020-03-12 | 1.00 | Campania              | <a href="https://www.gazzettaufficiale.it/showNewsDetail?id=2532&amp;backTo=archivio&amp;anno=2020&amp;provenienza=archivio">https://www.gazzettaufficiale.it/showNewsDetail?id=2532&amp;backTo=archivio&amp;anno=2020&amp;provenienza=archivio</a> |
| Lockdown | 2020-03-12 | 1.00 | Calabria              | <a href="https://www.gazzettaufficiale.it/showNewsDetail?id=2532&amp;backTo=archivio&amp;anno=2020&amp;provenienza=archivio">https://www.gazzettaufficiale.it/showNewsDetail?id=2532&amp;backTo=archivio&amp;anno=2020&amp;provenienza=archivio</a> |
| Lockdown | 2020-03-12 | 1.00 | Basilicata            | <a href="https://www.gazzettaufficiale.it/showNewsDetail?id=2532&amp;backTo=archivio&amp;anno=2020&amp;provenienza=archivio">https://www.gazzettaufficiale.it/showNewsDetail?id=2532&amp;backTo=archivio&amp;anno=2020&amp;provenienza=archivio</a> |
| Lockdown | 2020-03-12 | 1.00 | Abruzzo               | <a href="https://www.gazzettaufficiale.it/showNewsDetail?id=2532&amp;backTo=archivio&amp;anno=2020&amp;provenienza=archivio">https://www.gazzettaufficiale.it/showNewsDetail?id=2532&amp;backTo=archivio&amp;anno=2020&amp;provenienza=archivio</a> |
| Lockdown | 2020-03-12 | 1.00 | Emilia-Romagna        | <a href="https://www.gazzettaufficiale.it/showNewsDetail?id=2532&amp;backTo=archivio&amp;anno=2020&amp;provenienza=archivio">https://www.gazzettaufficiale.it/showNewsDetail?id=2532&amp;backTo=archivio&amp;anno=2020&amp;provenienza=archivio</a> |
| Lockdown | 2020-03-12 | 1.00 | Veneto                | <a href="https://www.gazzettaufficiale.it/showNewsDetail?id=2532&amp;backTo=archivio&amp;anno=2020&amp;provenienza=archivio">https://www.gazzettaufficiale.it/showNewsDetail?id=2532&amp;backTo=archivio&amp;anno=2020&amp;provenienza=archivio</a> |

|          |            |      |              |                                                                                                                                                                                                                                                     |
|----------|------------|------|--------------|-----------------------------------------------------------------------------------------------------------------------------------------------------------------------------------------------------------------------------------------------------|
| Lockdown | 2020-03-12 | 1.00 | Umbria       | <a href="https://www.gazzettaufficiale.it/showNewsDetail?id=2532&amp;backTo=archivio&amp;anno=2020&amp;provenienza=archivio">https://www.gazzettaufficiale.it/showNewsDetail?id=2532&amp;backTo=archivio&amp;anno=2020&amp;provenienza=archivio</a> |
| Lockdown | 2020-03-12 | 1.00 | Aosta Valley | <a href="https://www.gazzettaufficiale.it/showNewsDetail?id=2532&amp;backTo=archivio&amp;anno=2020&amp;provenienza=archivio">https://www.gazzettaufficiale.it/showNewsDetail?id=2532&amp;backTo=archivio&amp;anno=2020&amp;provenienza=archivio</a> |

| NPI                  | Date       | Cumulative share | Region               | Source                                                                                                                                                                                                                                              |
|----------------------|------------|------------------|----------------------|-----------------------------------------------------------------------------------------------------------------------------------------------------------------------------------------------------------------------------------------------------|
| Work-from-home order | 2020-03-22 | 1.00             | Lombardia            | <a href="https://www.gazzettaufficiale.it/showNewsDetail?id=2545&amp;backTo=archivio&amp;anno=2020&amp;provenienza=archivio">https://www.gazzettaufficiale.it/showNewsDetail?id=2545&amp;backTo=archivio&amp;anno=2020&amp;provenienza=archivio</a> |
| Work-from-home order | 2020-03-22 | 1.00             | Trentino-South Tyrol | <a href="https://www.gazzettaufficiale.it/showNewsDetail?id=2545&amp;backTo=archivio&amp;anno=2020&amp;provenienza=archivio">https://www.gazzettaufficiale.it/showNewsDetail?id=2545&amp;backTo=archivio&amp;anno=2020&amp;provenienza=archivio</a> |
| Work-from-home order | 2020-03-22 | 1.00             | Tuscany              | <a href="https://www.gazzettaufficiale.it/showNewsDetail?id=2545&amp;backTo=archivio&amp;anno=2020&amp;provenienza=archivio">https://www.gazzettaufficiale.it/showNewsDetail?id=2545&amp;backTo=archivio&amp;anno=2020&amp;provenienza=archivio</a> |
| Work-from-home order | 2020-03-22 | 1.00             | Sicily               | <a href="https://www.gazzettaufficiale.it/showNewsDetail?id=2545&amp;backTo=archivio&amp;anno=2020&amp;provenienza=archivio">https://www.gazzettaufficiale.it/showNewsDetail?id=2545&amp;backTo=archivio&amp;anno=2020&amp;provenienza=archivio</a> |
| Work-from-home order | 2020-03-22 | 1.00             | Sardinia             | <a href="https://www.gazzettaufficiale.it/showNewsDetail?id=2545&amp;backTo=archivio&amp;anno=2020&amp;provenienza=archivio">https://www.gazzettaufficiale.it/showNewsDetail?id=2545&amp;backTo=archivio&amp;anno=2020&amp;provenienza=archivio</a> |
| Work-from-home order | 2020-03-22 | 1.00             | Puglia (Apulia)      | <a href="https://www.gazzettaufficiale.it/showNewsDetail?id=2545&amp;backTo=archivio&amp;anno=2020&amp;provenienza=archivio">https://www.gazzettaufficiale.it/showNewsDetail?id=2545&amp;backTo=archivio&amp;anno=2020&amp;provenienza=archivio</a> |
| Work-from-home order | 2020-03-22 | 1.00             | Piemonte             | <a href="https://www.gazzettaufficiale.it/showNewsDetail?id=2545&amp;backTo=archivio&amp;anno=2020&amp;provenienza=archivio">https://www.gazzettaufficiale.it/showNewsDetail?id=2545&amp;backTo=archivio&amp;anno=2020&amp;provenienza=archivio</a> |
| Work-from-home order | 2020-03-22 | 1.00             | Molise               | <a href="https://www.gazzettaufficiale.it/showNewsDetail?id=2545&amp;backTo=archivio&amp;anno=2020&amp;provenienza=archivio">https://www.gazzettaufficiale.it/showNewsDetail?id=2545&amp;backTo=archivio&amp;anno=2020&amp;provenienza=archivio</a> |
| Work-from-home order | 2020-03-22 | 1.00             | Marche               | <a href="https://www.gazzettaufficiale.it/showNewsDetail?id=2545&amp;backTo=archivio&amp;anno=2020&amp;provenienza=archivio">https://www.gazzettaufficiale.it/showNewsDetail?id=2545&amp;backTo=archivio&amp;anno=2020&amp;provenienza=archivio</a> |
| Work-from-home order | 2020-03-22 | 1.00             | Liguria              | <a href="https://www.gazzettaufficiale.it/showNewsDetail?id=2545&amp;backTo=archivio&amp;anno=2020&amp;provenienza=archivio">https://www.gazzettaufficiale.it/showNewsDetail?id=2545&amp;backTo=archivio&amp;anno=2020&amp;provenienza=archivio</a> |

|                      |            |      |                       |                                                                                                                                                                                                                                                     |
|----------------------|------------|------|-----------------------|-----------------------------------------------------------------------------------------------------------------------------------------------------------------------------------------------------------------------------------------------------|
| Work-from-home order | 2020-03-22 | 1.00 | Lazio                 | <a href="https://www.gazzettaufficiale.it/showNewsDetail?id=2545&amp;backTo=archivio&amp;anno=2020&amp;provenienza=archivio">https://www.gazzettaufficiale.it/showNewsDetail?id=2545&amp;backTo=archivio&amp;anno=2020&amp;provenienza=archivio</a> |
| Work-from-home order | 2020-03-22 | 1.00 | Friuli-Venezia Giulia | <a href="https://www.gazzettaufficiale.it/showNewsDetail?id=2545&amp;backTo=archivio&amp;anno=2020&amp;provenienza=archivio">https://www.gazzettaufficiale.it/showNewsDetail?id=2545&amp;backTo=archivio&amp;anno=2020&amp;provenienza=archivio</a> |
| Work-from-home order | 2020-03-22 | 1.00 | Campania              | <a href="https://www.gazzettaufficiale.it/showNewsDetail?id=2545&amp;backTo=archivio&amp;anno=2020&amp;provenienza=archivio">https://www.gazzettaufficiale.it/showNewsDetail?id=2545&amp;backTo=archivio&amp;anno=2020&amp;provenienza=archivio</a> |
| Work-from-home order | 2020-03-22 | 1.00 | Calabria              | <a href="https://www.gazzettaufficiale.it/showNewsDetail?id=2545&amp;backTo=archivio&amp;anno=2020&amp;provenienza=archivio">https://www.gazzettaufficiale.it/showNewsDetail?id=2545&amp;backTo=archivio&amp;anno=2020&amp;provenienza=archivio</a> |
| Work-from-home order | 2020-03-22 | 1.00 | Basilicata            | <a href="https://www.gazzettaufficiale.it/showNewsDetail?id=2545&amp;backTo=archivio&amp;anno=2020&amp;provenienza=archivio">https://www.gazzettaufficiale.it/showNewsDetail?id=2545&amp;backTo=archivio&amp;anno=2020&amp;provenienza=archivio</a> |
| Work-from-home order | 2020-03-22 | 1.00 | Abruzzo               | <a href="https://www.gazzettaufficiale.it/showNewsDetail?id=2545&amp;backTo=archivio&amp;anno=2020&amp;provenienza=archivio">https://www.gazzettaufficiale.it/showNewsDetail?id=2545&amp;backTo=archivio&amp;anno=2020&amp;provenienza=archivio</a> |
| Work-from-home order | 2020-03-22 | 1.00 | Emilia-Romagna        | <a href="https://www.gazzettaufficiale.it/showNewsDetail?id=2545&amp;backTo=archivio&amp;anno=2020&amp;provenienza=archivio">https://www.gazzettaufficiale.it/showNewsDetail?id=2545&amp;backTo=archivio&amp;anno=2020&amp;provenienza=archivio</a> |
| Work-from-home order | 2020-03-22 | 1.00 | Veneto                | <a href="https://www.gazzettaufficiale.it/showNewsDetail?id=2545&amp;backTo=archivio&amp;anno=2020&amp;provenienza=archivio">https://www.gazzettaufficiale.it/showNewsDetail?id=2545&amp;backTo=archivio&amp;anno=2020&amp;provenienza=archivio</a> |
| Work-from-home order | 2020-03-22 | 1.00 | Umbria                | <a href="https://www.gazzettaufficiale.it/showNewsDetail?id=2545&amp;backTo=archivio&amp;anno=2020&amp;provenienza=archivio">https://www.gazzettaufficiale.it/showNewsDetail?id=2545&amp;backTo=archivio&amp;anno=2020&amp;provenienza=archivio</a> |
| Work-from-home order | 2020-03-22 | 1.00 | Aosta Valley          | <a href="https://www.gazzettaufficiale.it/showNewsDetail?id=2545&amp;backTo=archivio&amp;anno=2020&amp;provenienza=archivio">https://www.gazzettaufficiale.it/showNewsDetail?id=2545&amp;backTo=archivio&amp;anno=2020&amp;provenienza=archivio</a> |

**Table 12.** Sources for policies implemented across different Italian regions

| NPI | Date | Cumulative Region share | Source |
|-----|------|-------------------------|--------|
|-----|------|-------------------------|--------|





| NPI                     | Date       | Cumulative Region<br>share | Source                                                                                                                                                                                                                                                                                                                                  |
|-------------------------|------------|----------------------------|-----------------------------------------------------------------------------------------------------------------------------------------------------------------------------------------------------------------------------------------------------------------------------------------------------------------------------------------|
| Ban of small gatherings | 2020-03-16 | 0.02                       | <a href="https://www.ne.ch/medias/Pages/20200315-mesures-urgence-lutte-covid19-canton-de-neuchatel.aspx">https://www.ne.ch/medias/Pages/20200315-mesures-urgence-lutte-covid19-canton-de-neuchatel.aspx</a>                                                                                                                             |
| Ban of small gatherings | 2020-03-18 | 0.03                       | <a href="https://www.jura.ch/CHA/SIC/Centre-medias/Communicues-2020/COVID-19-etat-de-necessite-decrete-et-interdiction-des-rassemblements-de-plus-de-5-personnes.html">https://www.jura.ch/CHA/SIC/Centre-medias/Communicues-2020/COVID-19-etat-de-necessite-decrete-et-interdiction-des-rassemblements-de-plus-de-5-personnes.html</a> |
| Ban of small gatherings | 2020-03-20 | 1.00                       | <a href="https://www.admin.ch/gov/it/pagina-iniziale/documentazione/comunicati-stampa/comunicati-stampa-consiglio-federale.msg-id-78513.html">https://www.admin.ch/gov/it/pagina-iniziale/documentazione/comunicati-stampa/comunicati-stampa-consiglio-federale.msg-id-78513.html</a>                                                   |
| Ban of small gatherings | 2020-03-20 | 1.00                       | <a href="https://www.admin.ch/gov/it/pagina-iniziale/documentazione/comunicati-stampa/comunicati-stampa-consiglio-federale.msg-id-78513.html">https://www.admin.ch/gov/it/pagina-iniziale/documentazione/comunicati-stampa/comunicati-stampa-consiglio-federale.msg-id-78513.html</a>                                                   |
| Ban of small gatherings | 2020-03-20 | 1.00                       | <a href="https://www.admin.ch/gov/it/pagina-iniziale/documentazione/comunicati-stampa/comunicati-stampa-consiglio-federale.msg-id-78513.html">https://www.admin.ch/gov/it/pagina-iniziale/documentazione/comunicati-stampa/comunicati-stampa-consiglio-federale.msg-id-78513.html</a>                                                   |
| Ban of small gatherings | 2020-03-20 | 1.00                       | <a href="https://www.admin.ch/gov/it/pagina-iniziale/documentazione/comunicati-stampa/comunicati-stampa-consiglio-federale.msg-id-78513.html">https://www.admin.ch/gov/it/pagina-iniziale/documentazione/comunicati-stampa/comunicati-stampa-consiglio-federale.msg-id-78513.html</a>                                                   |
| Ban of small gatherings | 2020-03-20 | 1.00                       | <a href="https://www.admin.ch/gov/it/pagina-iniziale/documentazione/comunicati-stampa/comunicati-stampa-consiglio-federale.msg-id-78513.html">https://www.admin.ch/gov/it/pagina-iniziale/documentazione/comunicati-stampa/comunicati-stampa-consiglio-federale.msg-id-78513.html</a>                                                   |
| Ban of small gatherings | 2020-03-20 | 1.00                       | <a href="https://www.admin.ch/gov/it/pagina-iniziale/documentazione/comunicati-stampa/comunicati-stampa-consiglio-federale.msg-id-78513.html">https://www.admin.ch/gov/it/pagina-iniziale/documentazione/comunicati-stampa/comunicati-stampa-consiglio-federale.msg-id-78513.html</a>                                                   |
| Ban of small gatherings | 2020-03-20 | 1.00                       | <a href="https://www.admin.ch/gov/it/pagina-iniziale/documentazione/comunicati-stampa/comunicati-stampa-consiglio-federale.msg-id-78513.html">https://www.admin.ch/gov/it/pagina-iniziale/documentazione/comunicati-stampa/comunicati-stampa-consiglio-federale.msg-id-78513.html</a>                                                   |
| Ban of small gatherings | 2020-03-20 | 1.00                       | <a href="https://www.admin.ch/gov/it/pagina-iniziale/documentazione/comunicati-stampa/comunicati-stampa-consiglio-federale.msg-id-78513.html">https://www.admin.ch/gov/it/pagina-iniziale/documentazione/comunicati-stampa/comunicati-stampa-consiglio-federale.msg-id-78513.html</a>                                                   |
| Ban of small gatherings | 2020-03-20 | 1.00                       | <a href="https://www.admin.ch/gov/it/pagina-iniziale/documentazione/comunicati-stampa/comunicati-stampa-consiglio-federale.msg-id-78513.html">https://www.admin.ch/gov/it/pagina-iniziale/documentazione/comunicati-stampa/comunicati-stampa-consiglio-federale.msg-id-78513.html</a>                                                   |
| Ban of small gatherings | 2020-03-20 | 1.00                       | <a href="https://www.admin.ch/gov/it/pagina-iniziale/documentazione/comunicati-stampa/comunicati-stampa-consiglio-federale.msg-id-78513.html">https://www.admin.ch/gov/it/pagina-iniziale/documentazione/comunicati-stampa/comunicati-stampa-consiglio-federale.msg-id-78513.html</a>                                                   |
| Ban of small gatherings | 2020-03-20 | 1.00                       | <a href="https://www.admin.ch/gov/it/pagina-iniziale/documentazione/comunicati-stampa/comunicati-stampa-consiglio-federale.msg-id-78513.html">https://www.admin.ch/gov/it/pagina-iniziale/documentazione/comunicati-stampa/comunicati-stampa-consiglio-federale.msg-id-78513.html</a>                                                   |
| Ban of small gatherings | 2020-03-20 | 1.00                       | <a href="https://www.admin.ch/gov/it/pagina-iniziale/documentazione/comunicati-stampa/comunicati-stampa-consiglio-federale.msg-id-78513.html">https://www.admin.ch/gov/it/pagina-iniziale/documentazione/comunicati-stampa/comunicati-stampa-consiglio-federale.msg-id-78513.html</a>                                                   |
| Ban of small gatherings | 2020-03-20 | 1.00                       | <a href="https://www.admin.ch/gov/it/pagina-iniziale/documentazione/comunicati-stampa/comunicati-stampa-consiglio-federale.msg-id-78513.html">https://www.admin.ch/gov/it/pagina-iniziale/documentazione/comunicati-stampa/comunicati-stampa-consiglio-federale.msg-id-78513.html</a>                                                   |
| Ban of small gatherings | 2020-03-20 | 1.00                       | <a href="https://www.admin.ch/gov/it/pagina-iniziale/documentazione/comunicati-stampa/comunicati-stampa-consiglio-federale.msg-id-78513.html">https://www.admin.ch/gov/it/pagina-iniziale/documentazione/comunicati-stampa/comunicati-stampa-consiglio-federale.msg-id-78513.html</a>                                                   |

|                         |            |      |              |                                                                                                                                                                                                                                                                                       |
|-------------------------|------------|------|--------------|---------------------------------------------------------------------------------------------------------------------------------------------------------------------------------------------------------------------------------------------------------------------------------------|
| Ban of small gatherings | 2020-03-20 | 1.00 | Schaffhausen | <a href="https://www.admin.ch/gov/it/pagina-iniziale/documentazione/comunicati-stampa/comunicati-stampa-consiglio-federale.msg-id-78513.html">https://www.admin.ch/gov/it/pagina-iniziale/documentazione/comunicati-stampa/comunicati-stampa-consiglio-federale.msg-id-78513.html</a> |
| Ban of small gatherings | 2020-03-20 | 1.00 | Zurich       | <a href="https://www.admin.ch/gov/it/pagina-iniziale/documentazione/comunicati-stampa/comunicati-stampa-consiglio-federale.msg-id-78513.html">https://www.admin.ch/gov/it/pagina-iniziale/documentazione/comunicati-stampa/comunicati-stampa-consiglio-federale.msg-id-78513.html</a> |
| Ban of small gatherings | 2020-03-20 | 1.00 | Basel-Stadt  | <a href="https://www.admin.ch/gov/it/pagina-iniziale/documentazione/comunicati-stampa/comunicati-stampa-consiglio-federale.msg-id-78513.html">https://www.admin.ch/gov/it/pagina-iniziale/documentazione/comunicati-stampa/comunicati-stampa-consiglio-federale.msg-id-78513.html</a> |
| Ban of small gatherings | 2020-03-20 | 1.00 | Solothurn    | <a href="https://www.admin.ch/gov/it/pagina-iniziale/documentazione/comunicati-stampa/comunicati-stampa-consiglio-federale.msg-id-78513.html">https://www.admin.ch/gov/it/pagina-iniziale/documentazione/comunicati-stampa/comunicati-stampa-consiglio-federale.msg-id-78513.html</a> |
| Ban of small gatherings | 2020-03-20 | 1.00 | Fribourg     | <a href="https://www.admin.ch/gov/it/pagina-iniziale/documentazione/comunicati-stampa/comunicati-stampa-consiglio-federale.msg-id-78513.html">https://www.admin.ch/gov/it/pagina-iniziale/documentazione/comunicati-stampa/comunicati-stampa-consiglio-federale.msg-id-78513.html</a> |
| Ban of small gatherings | 2020-03-20 | 1.00 | Zug          | <a href="https://www.admin.ch/gov/it/pagina-iniziale/documentazione/comunicati-stampa/comunicati-stampa-consiglio-federale.msg-id-78513.html">https://www.admin.ch/gov/it/pagina-iniziale/documentazione/comunicati-stampa/comunicati-stampa-consiglio-federale.msg-id-78513.html</a> |
| Ban of small gatherings | 2020-03-20 | 1.00 | Glarus       | <a href="https://www.admin.ch/gov/it/pagina-iniziale/documentazione/comunicati-stampa/comunicati-stampa-consiglio-federale.msg-id-78513.html">https://www.admin.ch/gov/it/pagina-iniziale/documentazione/comunicati-stampa/comunicati-stampa-consiglio-federale.msg-id-78513.html</a> |
| Ban of small gatherings | 2020-03-20 | 1.00 | Nidwalden    | <a href="https://www.admin.ch/gov/it/pagina-iniziale/documentazione/comunicati-stampa/comunicati-stampa-consiglio-federale.msg-id-78513.html">https://www.admin.ch/gov/it/pagina-iniziale/documentazione/comunicati-stampa/comunicati-stampa-consiglio-federale.msg-id-78513.html</a> |
| Ban of small gatherings | 2020-03-20 | 1.00 | Obwalden     | <a href="https://www.admin.ch/gov/it/pagina-iniziale/documentazione/comunicati-stampa/comunicati-stampa-consiglio-federale.msg-id-78513.html">https://www.admin.ch/gov/it/pagina-iniziale/documentazione/comunicati-stampa/comunicati-stampa-consiglio-federale.msg-id-78513.html</a> |
| Ban of small gatherings | 2020-03-20 | 1.00 | Schwyz       | <a href="https://www.admin.ch/gov/it/pagina-iniziale/documentazione/comunicati-stampa/comunicati-stampa-consiglio-federale.msg-id-78513.html">https://www.admin.ch/gov/it/pagina-iniziale/documentazione/comunicati-stampa/comunicati-stampa-consiglio-federale.msg-id-78513.html</a> |
| Ban of small gatherings | 2020-03-20 | 1.00 | Uri          | <a href="https://www.admin.ch/gov/it/pagina-iniziale/documentazione/comunicati-stampa/comunicati-stampa-consiglio-federale.msg-id-78513.html">https://www.admin.ch/gov/it/pagina-iniziale/documentazione/comunicati-stampa/comunicati-stampa-consiglio-federale.msg-id-78513.html</a> |
| Ban of small gatherings | 2020-03-20 | 1.00 | Lucerne      | <a href="https://www.admin.ch/gov/it/pagina-iniziale/documentazione/comunicati-stampa/comunicati-stampa-consiglio-federale.msg-id-78513.html">https://www.admin.ch/gov/it/pagina-iniziale/documentazione/comunicati-stampa/comunicati-stampa-consiglio-federale.msg-id-78513.html</a> |
| Ban of small gatherings | 2020-03-20 | 1.00 | Bern         | <a href="https://www.admin.ch/gov/it/pagina-iniziale/documentazione/comunicati-stampa/comunicati-stampa-consiglio-federale.msg-id-78513.html">https://www.admin.ch/gov/it/pagina-iniziale/documentazione/comunicati-stampa/comunicati-stampa-consiglio-federale.msg-id-78513.html</a> |



| Ban of small gatherings | 2020-03-20 | 1.00             | Geneva           | <a href="https://www.admin.ch/gov/it/pagina-iniziale/documentazione/comunicati-stampa/comunicati-stampa-consiglio-federale.msg-id-78513.html">https://www.admin.ch/gov/it/pagina-iniziale/documentazione/comunicati-stampa/comunicati-stampa-consiglio-federale.msg-id-78513.html</a>                         |
|-------------------------|------------|------------------|------------------|---------------------------------------------------------------------------------------------------------------------------------------------------------------------------------------------------------------------------------------------------------------------------------------------------------------|
| Ban of small gatherings | 2020-03-20 | 1.00             | Basel-Landschaft | <a href="https://www.admin.ch/gov/it/pagina-iniziale/documentazione/comunicati-stampa/comunicati-stampa-consiglio-federale.msg-id-78513.html">https://www.admin.ch/gov/it/pagina-iniziale/documentazione/comunicati-stampa/comunicati-stampa-consiglio-federale.msg-id-78513.html</a>                         |
| NPI                     | Date       | Cumulative share | Region           | Source                                                                                                                                                                                                                                                                                                        |
| School closure          | 2020-03-16 | 1.00             | Zurich           | <a href="https://www.admin.ch/gov/it/pagina-iniziale/documentazione/comunicati-stampa/comunicati-stampa-consiglio-federale.html?dyn_startDate=01.01.2015">https://www.admin.ch/gov/it/pagina-iniziale/documentazione/comunicati-stampa/comunicati-stampa-consiglio-federale.html?dyn_startDate=01.01.2015</a> |
| School closure          | 2020-03-16 | 1.00             | Neuchâtel        | <a href="https://www.admin.ch/gov/it/pagina-iniziale/documentazione/comunicati-stampa/comunicati-stampa-consiglio-federale.html?dyn_startDate=01.01.2015">https://www.admin.ch/gov/it/pagina-iniziale/documentazione/comunicati-stampa/comunicati-stampa-consiglio-federale.html?dyn_startDate=01.01.2015</a> |
| School closure          | 2020-03-16 | 1.00             | Valais           | <a href="https://www.admin.ch/gov/it/pagina-iniziale/documentazione/comunicati-stampa/comunicati-stampa-consiglio-federale.html?dyn_startDate=01.01.2015">https://www.admin.ch/gov/it/pagina-iniziale/documentazione/comunicati-stampa/comunicati-stampa-consiglio-federale.html?dyn_startDate=01.01.2015</a> |
| School closure          | 2020-03-16 | 1.00             | Vaud             | <a href="https://www.admin.ch/gov/it/pagina-iniziale/documentazione/comunicati-stampa/comunicati-stampa-consiglio-federale.html?dyn_startDate=01.01.2015">https://www.admin.ch/gov/it/pagina-iniziale/documentazione/comunicati-stampa/comunicati-stampa-consiglio-federale.html?dyn_startDate=01.01.2015</a> |
| School closure          | 2020-03-16 | 1.00             | Ticino           | <a href="https://www.admin.ch/gov/it/pagina-iniziale/documentazione/comunicati-stampa/comunicati-stampa-consiglio-federale.html?dyn_startDate=01.01.2015">https://www.admin.ch/gov/it/pagina-iniziale/documentazione/comunicati-stampa/comunicati-stampa-consiglio-federale.html?dyn_startDate=01.01.2015</a> |
| School closure          | 2020-03-16 | 1.00             | Thurgau          | <a href="https://www.admin.ch/gov/it/pagina-iniziale/documentazione/comunicati-stampa/comunicati-stampa-consiglio-federale.html?dyn_startDate=01.01.2015">https://www.admin.ch/gov/it/pagina-iniziale/documentazione/comunicati-stampa/comunicati-stampa-consiglio-federale.html?dyn_startDate=01.01.2015</a> |

|                |            |      |                         |                                                                                                                                                                                                                                                                                                               |
|----------------|------------|------|-------------------------|---------------------------------------------------------------------------------------------------------------------------------------------------------------------------------------------------------------------------------------------------------------------------------------------------------------|
| School closure | 2020-03-16 | 1.00 | Aargau                  | <a href="https://www.admin.ch/gov/it/pagina-iniziale/documentazione/comunicati-stampa/comunicati-stampa-consiglio-federale.html?dyn_startDate=01.01.2015">https://www.admin.ch/gov/it/pagina-iniziale/documentazione/comunicati-stampa/comunicati-stampa-consiglio-federale.html?dyn_startDate=01.01.2015</a> |
| School closure | 2020-03-16 | 1.00 | Graubünden              | <a href="https://www.admin.ch/gov/it/pagina-iniziale/documentazione/comunicati-stampa/comunicati-stampa-consiglio-federale.html?dyn_startDate=01.01.2015">https://www.admin.ch/gov/it/pagina-iniziale/documentazione/comunicati-stampa/comunicati-stampa-consiglio-federale.html?dyn_startDate=01.01.2015</a> |
| School closure | 2020-03-16 | 1.00 | St. Gallen              | <a href="https://www.admin.ch/gov/it/pagina-iniziale/documentazione/comunicati-stampa/comunicati-stampa-consiglio-federale.html?dyn_startDate=01.01.2015">https://www.admin.ch/gov/it/pagina-iniziale/documentazione/comunicati-stampa/comunicati-stampa-consiglio-federale.html?dyn_startDate=01.01.2015</a> |
| School closure | 2020-03-16 | 1.00 | Appenzell Innerrho-den  | <a href="https://www.admin.ch/gov/it/pagina-iniziale/documentazione/comunicati-stampa/comunicati-stampa-consiglio-federale.html?dyn_startDate=01.01.2015">https://www.admin.ch/gov/it/pagina-iniziale/documentazione/comunicati-stampa/comunicati-stampa-consiglio-federale.html?dyn_startDate=01.01.2015</a> |
| School closure | 2020-03-16 | 1.00 | Appenzell Ausserrho-den | <a href="https://www.admin.ch/gov/it/pagina-iniziale/documentazione/comunicati-stampa/comunicati-stampa-consiglio-federale.html?dyn_startDate=01.01.2015">https://www.admin.ch/gov/it/pagina-iniziale/documentazione/comunicati-stampa/comunicati-stampa-consiglio-federale.html?dyn_startDate=01.01.2015</a> |
| School closure | 2020-03-16 | 1.00 | Schaffhausen            | <a href="https://www.admin.ch/gov/it/pagina-iniziale/documentazione/comunicati-stampa/comunicati-stampa-consiglio-federale.html?dyn_startDate=01.01.2015">https://www.admin.ch/gov/it/pagina-iniziale/documentazione/comunicati-stampa/comunicati-stampa-consiglio-federale.html?dyn_startDate=01.01.2015</a> |
| School closure | 2020-03-16 | 1.00 | Basel-Landschaft        | <a href="https://www.admin.ch/gov/it/pagina-iniziale/documentazione/comunicati-stampa/comunicati-stampa-consiglio-federale.html?dyn_startDate=01.01.2015">https://www.admin.ch/gov/it/pagina-iniziale/documentazione/comunicati-stampa/comunicati-stampa-consiglio-federale.html?dyn_startDate=01.01.2015</a> |
| School closure | 2020-03-16 | 1.00 | Basel-Stadt             | <a href="https://www.admin.ch/gov/it/pagina-iniziale/documentazione/comunicati-stampa/comunicati-stampa-consiglio-federale.html?dyn_startDate=01.01.2015">https://www.admin.ch/gov/it/pagina-iniziale/documentazione/comunicati-stampa/comunicati-stampa-consiglio-federale.html?dyn_startDate=01.01.2015</a> |

|                |            |      |           |                                                                                                                                                                                                                                                                                                               |
|----------------|------------|------|-----------|---------------------------------------------------------------------------------------------------------------------------------------------------------------------------------------------------------------------------------------------------------------------------------------------------------------|
| School closure | 2020-03-16 | 1.00 | Solothurn | <a href="https://www.admin.ch/gov/it/pagina-iniziale/documentazione/comunicati-stampa/comunicati-stampa-consiglio-federale.html?dyn_startDate=01.01.2015">https://www.admin.ch/gov/it/pagina-iniziale/documentazione/comunicati-stampa/comunicati-stampa-consiglio-federale.html?dyn_startDate=01.01.2015</a> |
| School closure | 2020-03-16 | 1.00 | Fribourg  | <a href="https://www.admin.ch/gov/it/pagina-iniziale/documentazione/comunicati-stampa/comunicati-stampa-consiglio-federale.html?dyn_startDate=01.01.2015">https://www.admin.ch/gov/it/pagina-iniziale/documentazione/comunicati-stampa/comunicati-stampa-consiglio-federale.html?dyn_startDate=01.01.2015</a> |
| School closure | 2020-03-16 | 1.00 | Zug       | <a href="https://www.admin.ch/gov/it/pagina-iniziale/documentazione/comunicati-stampa/comunicati-stampa-consiglio-federale.html?dyn_startDate=01.01.2015">https://www.admin.ch/gov/it/pagina-iniziale/documentazione/comunicati-stampa/comunicati-stampa-consiglio-federale.html?dyn_startDate=01.01.2015</a> |
| School closure | 2020-03-16 | 1.00 | Glarus    | <a href="https://www.admin.ch/gov/it/pagina-iniziale/documentazione/comunicati-stampa/comunicati-stampa-consiglio-federale.html?dyn_startDate=01.01.2015">https://www.admin.ch/gov/it/pagina-iniziale/documentazione/comunicati-stampa/comunicati-stampa-consiglio-federale.html?dyn_startDate=01.01.2015</a> |
| School closure | 2020-03-16 | 1.00 | Nidwalden | <a href="https://www.admin.ch/gov/it/pagina-iniziale/documentazione/comunicati-stampa/comunicati-stampa-consiglio-federale.html?dyn_startDate=01.01.2015">https://www.admin.ch/gov/it/pagina-iniziale/documentazione/comunicati-stampa/comunicati-stampa-consiglio-federale.html?dyn_startDate=01.01.2015</a> |
| School closure | 2020-03-16 | 1.00 | Obwalden  | <a href="https://www.admin.ch/gov/it/pagina-iniziale/documentazione/comunicati-stampa/comunicati-stampa-consiglio-federale.html?dyn_startDate=01.01.2015">https://www.admin.ch/gov/it/pagina-iniziale/documentazione/comunicati-stampa/comunicati-stampa-consiglio-federale.html?dyn_startDate=01.01.2015</a> |
| School closure | 2020-03-16 | 1.00 | Schwyz    | <a href="https://www.admin.ch/gov/it/pagina-iniziale/documentazione/comunicati-stampa/comunicati-stampa-consiglio-federale.html?dyn_startDate=01.01.2015">https://www.admin.ch/gov/it/pagina-iniziale/documentazione/comunicati-stampa/comunicati-stampa-consiglio-federale.html?dyn_startDate=01.01.2015</a> |
| School closure | 2020-03-16 | 1.00 | Uri       | <a href="https://www.admin.ch/gov/it/pagina-iniziale/documentazione/comunicati-stampa/comunicati-stampa-consiglio-federale.html?dyn_startDate=01.01.2015">https://www.admin.ch/gov/it/pagina-iniziale/documentazione/comunicati-stampa/comunicati-stampa-consiglio-federale.html?dyn_startDate=01.01.2015</a> |

| School closure | 2020-03-16 | 1.00             | Lucerne    | <a href="https://www.admin.ch/gov/it/pagina-iniziale/documentazione/comunicati-stampa/comunicati-stampa-consiglio-federale.html?dyn_startDate=01.01.2015">https://www.admin.ch/gov/it/pagina-iniziale/documentazione/comunicati-stampa/comunicati-stampa-consiglio-federale.html?dyn_startDate=01.01.2015</a>                                                                                                     |
|----------------|------------|------------------|------------|-------------------------------------------------------------------------------------------------------------------------------------------------------------------------------------------------------------------------------------------------------------------------------------------------------------------------------------------------------------------------------------------------------------------|
| School closure | 2020-03-16 | 1.00             | Bern       | <a href="https://www.admin.ch/gov/it/pagina-iniziale/documentazione/comunicati-stampa/comunicati-stampa-consiglio-federale.html?dyn_startDate=01.01.2015">https://www.admin.ch/gov/it/pagina-iniziale/documentazione/comunicati-stampa/comunicati-stampa-consiglio-federale.html?dyn_startDate=01.01.2015</a>                                                                                                     |
| School closure | 2020-03-16 | 1.00             | Geneva     | <a href="https://www.admin.ch/gov/it/pagina-iniziale/documentazione/comunicati-stampa/comunicati-stampa-consiglio-federale.html?dyn_startDate=01.01.2015">https://www.admin.ch/gov/it/pagina-iniziale/documentazione/comunicati-stampa/comunicati-stampa-consiglio-federale.html?dyn_startDate=01.01.2015</a>                                                                                                     |
| School closure | 2020-03-16 | 1.00             | Jura       | <a href="https://www.admin.ch/gov/it/pagina-iniziale/documentazione/comunicati-stampa/comunicati-stampa-consiglio-federale.html?dyn_startDate=01.01.2015">https://www.admin.ch/gov/it/pagina-iniziale/documentazione/comunicati-stampa/comunicati-stampa-consiglio-federale.html?dyn_startDate=01.01.2015</a>                                                                                                     |
| NPI            | Date       | Cumulative share | Region     | Source                                                                                                                                                                                                                                                                                                                                                                                                            |
| Venue sure     | 2020-03-14 | 0.04             | Ticino     | <a href="https://www4.ti.ch/dss/dsp/covid19/home/">https://www4.ti.ch/dss/dsp/covid19/home/</a>                                                                                                                                                                                                                                                                                                                   |
| Venue sure     | 2020-03-16 | 0.09             | Jura       | <a href="https://www.jura.ch/CHA/SIC/Centre-medias/Communiqués-2020/COVID-19-le-canton-du-Jura-prend-des-mesures-supplementaires-pour-protéger-la-population-et-enrayer-la-propagation-du-coronavirus.html">https://www.jura.ch/CHA/SIC/Centre-medias/Communiqués-2020/COVID-19-le-canton-du-Jura-prend-des-mesures-supplementaires-pour-protéger-la-population-et-enrayer-la-propagation-du-coronavirus.html</a> |
| Venue sure     | 2020-03-16 | 0.09             | Neuchâtel  | <a href="https://www.ne.ch/medias/Pages/20200315-mesures-urgence-lutte-covid19-canton-de-neuchatel.aspx">https://www.ne.ch/medias/Pages/20200315-mesures-urgence-lutte-covid19-canton-de-neuchatel.aspx</a>                                                                                                                                                                                                       |
| Venue sure     | 2020-03-16 | 0.09             | Graubünden | <a href="https://www.kantonsamtsblatt.gr.ch/it/efuc/00.045.026/publikation/">https://www.kantonsamtsblatt.gr.ch/it/efuc/00.045.026/publikation/</a>                                                                                                                                                                                                                                                               |
| Venue sure     | 2020-03-17 | 1.00             | Valais     | <a href="https://www.admin.ch/gov/it/pagina-iniziale/documentazione/comunicati-stampa/comunicati-stampa-consiglio-federale.html?dyn_startDate=01.01.2015">https://www.admin.ch/gov/it/pagina-iniziale/documentazione/comunicati-stampa/comunicati-stampa-consiglio-federale.html?dyn_startDate=01.01.2015</a>                                                                                                     |

|       |      |            |      |                      |                                                                                                                                                                                                                                                                                                               |
|-------|------|------------|------|----------------------|---------------------------------------------------------------------------------------------------------------------------------------------------------------------------------------------------------------------------------------------------------------------------------------------------------------|
| Venue | clo- | 2020-03-17 | 1.00 | Vaud                 | <a href="https://www.admin.ch/gov/it/pagina-iniziale/documentazione/comunicati-stampa/comunicati-stampa-consiglio-federale.html?dyn_startDate=01.01.2015">https://www.admin.ch/gov/it/pagina-iniziale/documentazione/comunicati-stampa/comunicati-stampa-consiglio-federale.html?dyn_startDate=01.01.2015</a> |
| Venue | clo- | 2020-03-17 | 1.00 | Thurgau              | <a href="https://www.admin.ch/gov/it/pagina-iniziale/documentazione/comunicati-stampa/comunicati-stampa-consiglio-federale.html?dyn_startDate=01.01.2015">https://www.admin.ch/gov/it/pagina-iniziale/documentazione/comunicati-stampa/comunicati-stampa-consiglio-federale.html?dyn_startDate=01.01.2015</a> |
| Venue | clo- | 2020-03-17 | 1.00 | Aargau               | <a href="https://www.admin.ch/gov/it/pagina-iniziale/documentazione/comunicati-stampa/comunicati-stampa-consiglio-federale.html?dyn_startDate=01.01.2015">https://www.admin.ch/gov/it/pagina-iniziale/documentazione/comunicati-stampa/comunicati-stampa-consiglio-federale.html?dyn_startDate=01.01.2015</a> |
| Venue | clo- | 2020-03-17 | 1.00 | St. Gallen           | <a href="https://www.admin.ch/gov/it/pagina-iniziale/documentazione/comunicati-stampa/comunicati-stampa-consiglio-federale.html?dyn_startDate=01.01.2015">https://www.admin.ch/gov/it/pagina-iniziale/documentazione/comunicati-stampa/comunicati-stampa-consiglio-federale.html?dyn_startDate=01.01.2015</a> |
| Venue | clo- | 2020-03-17 | 1.00 | Appenzell Innerrho-  | <a href="https://www.admin.ch/gov/it/pagina-iniziale/documentazione/comunicati-stampa/comunicati-stampa-consiglio-federale.html?dyn_startDate=01.01.2015">https://www.admin.ch/gov/it/pagina-iniziale/documentazione/comunicati-stampa/comunicati-stampa-consiglio-federale.html?dyn_startDate=01.01.2015</a> |
| Venue | clo- | 2020-03-17 | 1.00 | den                  | <a href="https://www.admin.ch/gov/it/pagina-iniziale/documentazione/comunicati-stampa/comunicati-stampa-consiglio-federale.html?dyn_startDate=01.01.2015">https://www.admin.ch/gov/it/pagina-iniziale/documentazione/comunicati-stampa/comunicati-stampa-consiglio-federale.html?dyn_startDate=01.01.2015</a> |
| Venue | clo- | 2020-03-17 | 1.00 | Appenzell Ausserrho- | <a href="https://www.admin.ch/gov/it/pagina-iniziale/documentazione/comunicati-stampa/comunicati-stampa-consiglio-federale.html?dyn_startDate=01.01.2015">https://www.admin.ch/gov/it/pagina-iniziale/documentazione/comunicati-stampa/comunicati-stampa-consiglio-federale.html?dyn_startDate=01.01.2015</a> |
| Venue | clo- | 2020-03-17 | 1.00 | den                  | <a href="https://www.admin.ch/gov/it/pagina-iniziale/documentazione/comunicati-stampa/comunicati-stampa-consiglio-federale.html?dyn_startDate=01.01.2015">https://www.admin.ch/gov/it/pagina-iniziale/documentazione/comunicati-stampa/comunicati-stampa-consiglio-federale.html?dyn_startDate=01.01.2015</a> |
| Venue | clo- | 2020-03-17 | 1.00 | Schaffhausen         | <a href="https://www.admin.ch/gov/it/pagina-iniziale/documentazione/comunicati-stampa/comunicati-stampa-consiglio-federale.html?dyn_startDate=01.01.2015">https://www.admin.ch/gov/it/pagina-iniziale/documentazione/comunicati-stampa/comunicati-stampa-consiglio-federale.html?dyn_startDate=01.01.2015</a> |
| Venue | clo- | 2020-03-17 | 1.00 | Zurich               | <a href="https://www.admin.ch/gov/it/pagina-iniziale/documentazione/comunicati-stampa/comunicati-stampa-consiglio-federale.html?dyn_startDate=01.01.2015">https://www.admin.ch/gov/it/pagina-iniziale/documentazione/comunicati-stampa/comunicati-stampa-consiglio-federale.html?dyn_startDate=01.01.2015</a> |
| Venue | sure |            |      |                      |                                                                                                                                                                                                                                                                                                               |

|       |      |            |      |             |                                                                                                                                                                                                                                                                                                               |
|-------|------|------------|------|-------------|---------------------------------------------------------------------------------------------------------------------------------------------------------------------------------------------------------------------------------------------------------------------------------------------------------------|
| Venue | clo- | 2020-03-17 | 1.00 | Basel-Stadt | <a href="https://www.admin.ch/gov/it/pagina-iniziale/documentazione/comunicati-stampa/comunicati-stampa-consiglio-federale.html?dyn_startDate=01.01.2015">https://www.admin.ch/gov/it/pagina-iniziale/documentazione/comunicati-stampa/comunicati-stampa-consiglio-federale.html?dyn_startDate=01.01.2015</a> |
| Venue | clo- | 2020-03-17 | 1.00 | Solothurn   | <a href="https://www.admin.ch/gov/it/pagina-iniziale/documentazione/comunicati-stampa/comunicati-stampa-consiglio-federale.html?dyn_startDate=01.01.2015">https://www.admin.ch/gov/it/pagina-iniziale/documentazione/comunicati-stampa/comunicati-stampa-consiglio-federale.html?dyn_startDate=01.01.2015</a> |
| Venue | clo- | 2020-03-17 | 1.00 | Fribourg    | <a href="https://www.admin.ch/gov/it/pagina-iniziale/documentazione/comunicati-stampa/comunicati-stampa-consiglio-federale.html?dyn_startDate=01.01.2015">https://www.admin.ch/gov/it/pagina-iniziale/documentazione/comunicati-stampa/comunicati-stampa-consiglio-federale.html?dyn_startDate=01.01.2015</a> |
| Venue | clo- | 2020-03-17 | 1.00 | Zug         | <a href="https://www.admin.ch/gov/it/pagina-iniziale/documentazione/comunicati-stampa/comunicati-stampa-consiglio-federale.html?dyn_startDate=01.01.2015">https://www.admin.ch/gov/it/pagina-iniziale/documentazione/comunicati-stampa/comunicati-stampa-consiglio-federale.html?dyn_startDate=01.01.2015</a> |
| Venue | clo- | 2020-03-17 | 1.00 | Glarus      | <a href="https://www.admin.ch/gov/it/pagina-iniziale/documentazione/comunicati-stampa/comunicati-stampa-consiglio-federale.html?dyn_startDate=01.01.2015">https://www.admin.ch/gov/it/pagina-iniziale/documentazione/comunicati-stampa/comunicati-stampa-consiglio-federale.html?dyn_startDate=01.01.2015</a> |
| Venue | clo- | 2020-03-17 | 1.00 | Nidwalden   | <a href="https://www.admin.ch/gov/it/pagina-iniziale/documentazione/comunicati-stampa/comunicati-stampa-consiglio-federale.html?dyn_startDate=01.01.2015">https://www.admin.ch/gov/it/pagina-iniziale/documentazione/comunicati-stampa/comunicati-stampa-consiglio-federale.html?dyn_startDate=01.01.2015</a> |
| Venue | clo- | 2020-03-17 | 1.00 | Obwalden    | <a href="https://www.admin.ch/gov/it/pagina-iniziale/documentazione/comunicati-stampa/comunicati-stampa-consiglio-federale.html?dyn_startDate=01.01.2015">https://www.admin.ch/gov/it/pagina-iniziale/documentazione/comunicati-stampa/comunicati-stampa-consiglio-federale.html?dyn_startDate=01.01.2015</a> |
| Venue | clo- | 2020-03-17 | 1.00 | Schwyz      | <a href="https://www.admin.ch/gov/it/pagina-iniziale/documentazione/comunicati-stampa/comunicati-stampa-consiglio-federale.html?dyn_startDate=01.01.2015">https://www.admin.ch/gov/it/pagina-iniziale/documentazione/comunicati-stampa/comunicati-stampa-consiglio-federale.html?dyn_startDate=01.01.2015</a> |

|                      |      |             |                         |                  |                                                                                                                                                                                                                                                                                                               |
|----------------------|------|-------------|-------------------------|------------------|---------------------------------------------------------------------------------------------------------------------------------------------------------------------------------------------------------------------------------------------------------------------------------------------------------------|
| Venue                | clo- | 2020-03-17  | 1.00                    | Uri              | <a href="https://www.admin.ch/gov/it/pagina-iniziale/documentazione/comunicati-stampa/comunicati-stampa-consiglio-federale.html?dyn_startDate=01.01.2015">https://www.admin.ch/gov/it/pagina-iniziale/documentazione/comunicati-stampa/comunicati-stampa-consiglio-federale.html?dyn_startDate=01.01.2015</a> |
| Venue                | clo- | 2020-03-17  | 1.00                    | Lucerne          | <a href="https://www.admin.ch/gov/it/pagina-iniziale/documentazione/comunicati-stampa/comunicati-stampa-consiglio-federale.html?dyn_startDate=01.01.2015">https://www.admin.ch/gov/it/pagina-iniziale/documentazione/comunicati-stampa/comunicati-stampa-consiglio-federale.html?dyn_startDate=01.01.2015</a> |
| Venue                | clo- | 2020-03-17  | 1.00                    | Bern             | <a href="https://www.admin.ch/gov/it/pagina-iniziale/documentazione/comunicati-stampa/comunicati-stampa-consiglio-federale.html?dyn_startDate=01.01.2015">https://www.admin.ch/gov/it/pagina-iniziale/documentazione/comunicati-stampa/comunicati-stampa-consiglio-federale.html?dyn_startDate=01.01.2015</a> |
| Venue                | clo- | 2020-03-17  | 1.00                    | Geneva           | <a href="https://www.admin.ch/gov/it/pagina-iniziale/documentazione/comunicati-stampa/comunicati-stampa-consiglio-federale.html?dyn_startDate=01.01.2015">https://www.admin.ch/gov/it/pagina-iniziale/documentazione/comunicati-stampa/comunicati-stampa-consiglio-federale.html?dyn_startDate=01.01.2015</a> |
| Venue                | clo- | 2020-03-17  | 1.00                    | Basel-Landschaft | <a href="https://www.admin.ch/gov/it/pagina-iniziale/documentazione/comunicati-stampa/comunicati-stampa-consiglio-federale.html?dyn_startDate=01.01.2015">https://www.admin.ch/gov/it/pagina-iniziale/documentazione/comunicati-stampa/comunicati-stampa-consiglio-federale.html?dyn_startDate=01.01.2015</a> |
| <b>NPI</b>           |      | <b>Date</b> | <b>CumulativeRegion</b> |                  | <b>Source</b>                                                                                                                                                                                                                                                                                                 |
|                      |      |             | <b>share</b>            |                  |                                                                                                                                                                                                                                                                                                               |
| <b>NPI</b>           |      | <b>Date</b> | <b>CumulativeRegion</b> |                  | <b>Source</b>                                                                                                                                                                                                                                                                                                 |
|                      |      |             | <b>share</b>            |                  |                                                                                                                                                                                                                                                                                                               |
| Work-from-home order |      | 2020-03-14  | 0.04                    | Ticino           | <a href="https://www4.ti.ch/dss/dsp/covid19/home/">https://www4.ti.ch/dss/dsp/covid19/home/</a>                                                                                                                                                                                                               |

**Table 13.** Sources for policies implemented across different Swiss regions

## References

- 507
- 508 **1.** Cori A, Ferguson NM, Fraser C, Cauchemez S. A New Framework and Software to Estimate  
509 Time-Varying Reproduction Numbers During Epidemics. *American Journal of Epidemiology*.  
510 2013 4;178(9):1505–1512. Available from: [https://academic.oup.com/aje/article-lookup/  
511 doi/10.1093/aje/kwt133](https://academic.oup.com/aje/article-lookup/doi/10.1093/aje/kwt133).
  - 512 **2.** Fraser C. Estimating Individual and Household Reproduction Numbers in an Emerging Epidemic.  
513 *PLoS ONE*. 2007 4;2(8):e758. Available from: [https://dx.plos.org/10.1371/journal.pone.  
514 0000758](https://dx.plos.org/10.1371/journal.pone.0000758).
  - 515 **3.** McAloon C, Collins A, Hunt K, Barber A, Byrne AW, Butler F, et al. Incubation period of COVID-  
516 19: a rapid systematic review and meta-analysis of observational research. *BMJ Open*. 2020  
517 4;10(8):e039652. Available from: [https://bmjopen.bmj.com/lookup/doi/10.1136/bmjopen-  
518 2020-039652](https://bmjopen.bmj.com/lookup/doi/10.1136/bmjopen-2020-039652).
  - 519 **4.** Cereda D, Tirani M, Rovida F, Demicheli V, Ajelli M, Poletti P, et al. The early phase of the  
520 COVID-19 outbreak in Lombardy, Italy. *arXiv*. 2020 4; Available from: [http://arxiv.org/abs/  
521 2003.09320](http://arxiv.org/abs/2003.09320).
  - 522 **5.** Akhmetzhanov AR, Mizumoto K, Jung Sm, Linton NM, Omori R, Nishiura H. Epidemiological  
523 characteristics of novel coronavirus infection: A statistical analysis of publicly available case data.  
524 *medRxiv*. 2020; Available from: [https://www.medrxiv.org/content/medrxiv/early/2020/04/  
525 30/2020.04.24.20077800.full.pdf](https://www.medrxiv.org/content/medrxiv/early/2020/04/30/2020.04.24.20077800.full.pdf).
  - 526 **6.** Günther F, Bender A, Katz K, Küchenhoff H, Höhle M. Nowcasting the COVID-19 pan-  
527 demic in Bavaria. *Biometrical Journal*. 2020 4;p. bimj.202000112. Available from: [https:  
528 //onlinelibrary.wiley.com/doi/10.1002/bimj.202000112](https://onlinelibrary.wiley.com/doi/10.1002/bimj.202000112).
  - 529 **7.** Leung K, Wu JT, Liu D, Leung GM. First-wave COVID-19 transmissibility and severity in China  
530 outside Hubei after control measures, and second-wave scenario planning: a modelling impact  
531 assessment. *The Lancet*. 2020 4;395(10233):1382–1393. Available from: [https://linkinghub.  
532 elsevier.com/retrieve/pii/S0140673620307467](https://linkinghub.elsevier.com/retrieve/pii/S0140673620307467).
  - 533 **8.** Tariq A, Lee Y, Roosa K, Blumberg S, Yan P, Ma S, et al. Real-time monitoring the transmission  
534 potential of COVID-19 in Singapore, March 2020. *BMC Medicine*. 2020 4;18(1):166. Available



- 535 from: <https://bmcmecine.biomedcentral.com/articles/10.1186/s12916-020-01615-9>.
- 536 **9.** Flaxman S, Mishra S, Gandy A, Unwin HJT, Mellan TA, Coupland H, et al. Estimating the effects  
537 of non-pharmaceutical interventions on COVID-19 in Europe. *Nature*. 2020 4;584(7820):257–261.  
538 Available from: <http://www.nature.com/articles/s41586-020-2405-7>.
- 539 **10.** Lehtinen S, Ashcroft P, Bonhoeffer S. On the relationship between serial interval, infectiousness  
540 profile and generation time. *medRxiv*. 2020 4;Available from: [https://doi.org/10.1101/2020.](https://doi.org/10.1101/2020.09.18.20197210)  
541 [09.18.20197210](https://doi.org/10.1101/2020.09.18.20197210).
- 542 **11.** Ferretti L, Wymant C, Kendall M, Zhao L, Nurtay A, Abeler-Dörner L, et al. Quantifying  
543 SARS-CoV-2 transmission suggests epidemic control with digital contact tracing. *Science*. 2020  
544 4;368(6491):eabb6936. Available from: [https://www.sciencemag.org/lookup/doi/10.1126/](https://www.sciencemag.org/lookup/doi/10.1126/science.abb6936)  
545 [science.abb6936](https://www.sciencemag.org/lookup/doi/10.1126/science.abb6936).
- 546 **12.** Ganyani T, Kremer C, Chen D, Torneri A, Faes C, Wallinga J, et al. Estimating the generation  
547 interval for coronavirus disease (COVID-19) based on symptom onset data, March 2020. *Euro*  
548 *surveillance* : bulletin Europeen sur les maladies transmissibles = European communicable  
549 disease bulletin. 2020 4;25(17):2000257. Available from: [https://pubmed.ncbi.nlm.nih.gov/](https://pubmed.ncbi.nlm.nih.gov/32372755https://www.ncbi.nlm.nih.gov/pmc/articles/PMC7201952/)  
550 [32372755https://www.ncbi.nlm.nih.gov/pmc/articles/PMC7201952/](https://pubmed.ncbi.nlm.nih.gov/32372755https://www.ncbi.nlm.nih.gov/pmc/articles/PMC7201952/).
- 551 **13.** Ferretti L, Ledda A, Wymant C, Zhao L, Ledda V, Abeler L, et al. The timing of COVID-19  
552 transmission. *medRxiv*. 2020 4;Available from: [https://www.medrxiv.org/content/10.1101/](https://www.medrxiv.org/content/10.1101/2020.09.04.20188516v2)  
553 [2020.09.04.20188516v2](https://www.medrxiv.org/content/10.1101/2020.09.04.20188516v2).
- 554 **14.** Liu Y, Gayle AA, Wilder-Smith A, Rocklöv J. The reproductive number of COVID-19 is  
555 higher compared to SARS coronavirus. *Journal of Travel Medicine*. 2020 4;27(2). Available from:  
556 <https://academic.oup.com/jtm/article/doi/10.1093/jtm/taaa021/5735319>.
- 557 **15.** Stan Development Team. Prior Choice Recommendations; 2020. Available from: [https:](https://github.com/stan-dev/stan/wiki/Prior-Choice-Recommendations)  
558 [//github.com/stan-dev/stan/wiki/Prior-Choice-Recommendations](https://github.com/stan-dev/stan/wiki/Prior-Choice-Recommendations).
- 559 **16.** Carpenter B, Gelman A, Hoffman MD, Lee D, Goodrich B, Betancourt M, et al. Stan : A  
560 Probabilistic Programming Language. *Journal of Statistical Software*. 2017;76(1). Available from:  
561 <http://www.jstatsoft.org/v76/i01/>.

- 562 **17.** Brauner JM, Mindermann S, Sharma M, Johnston D, Salvatier J, Gavenčiak T, et al. Inferring  
563 the effectiveness of government interventions against COVID-19. *Science*. 2020 4;p. eabd9338.  
564 Available from: <https://www.sciencemag.org/lookup/doi/10.1126/science.abd9338>.
- 565 **18.** Stan Development Team. Stan modeling language users guide (Version 2.21); 2019. Avail-  
566 able from: [https://mc-stan.org/docs/2\\_21/reference-manual/effective-sample-size-](https://mc-stan.org/docs/2_21/reference-manual/effective-sample-size-section.html)  
567 [section.html](https://mc-stan.org/docs/2_21/reference-manual/effective-sample-size-section.html).
- 568 **19.** Gelman A, Rubin DB, others. Inference from iterative simulation using multiple sequences.  
569 *Statistical science*. 1992;7(4):457–472.
- 570 **20.** Gelman A, Carlin JB, Stern HS, Dunson DB, Vehtari A, Rubin DB. *Bayesian Data Analysis*.  
571 Chapman & Hall; 2013.
- 572 **21.** Vehtari A, Gelman A, Gabry J. Practical Bayesian model evaluation using leave-one-out  
573 cross-validation and WAIC. *Statistics and Computing*. 2017;27(5):1413–1432.
- 574 **22.** Hale T, Webster S, Petherick A, Phillips T, Kira B. Oxford COVID-19 Government Response  
575 Tracker. Blavatnik School of Government. 2020;Available from: [https://www.bsg.ox.ac.uk/](https://www.bsg.ox.ac.uk/research/research-projects/coronavirus-government-response-tracker)  
576 [research/research-projects/coronavirus-government-response-tracker](https://www.bsg.ox.ac.uk/research/research-projects/coronavirus-government-response-tracker).
